# Supplementary material for: Genome-Wide Analysis of Snf2 Gene Family Reveals Potential Role in Regulation of Spike Development in Barley
Source: MDPI journal article supplement (doi:10.3390/ijms24010457), 2022-12-27
Supplement: s1 [file s1]

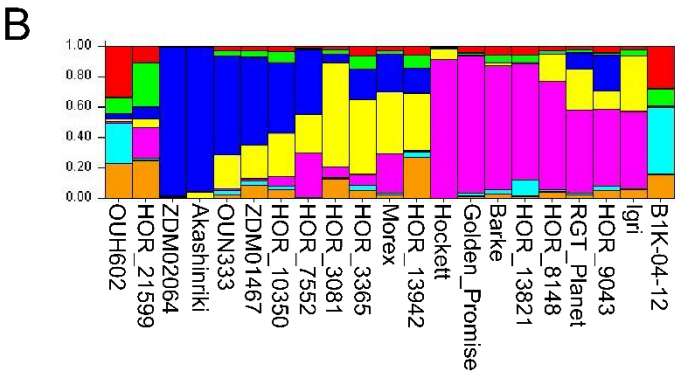

**Figure S1.** Population structure analysis of the *Snf2*-associated SNPs among different barley accessions. (A) Cluster dendrogram of SNPs across barley accessions. (B) Population structure with K = 7.

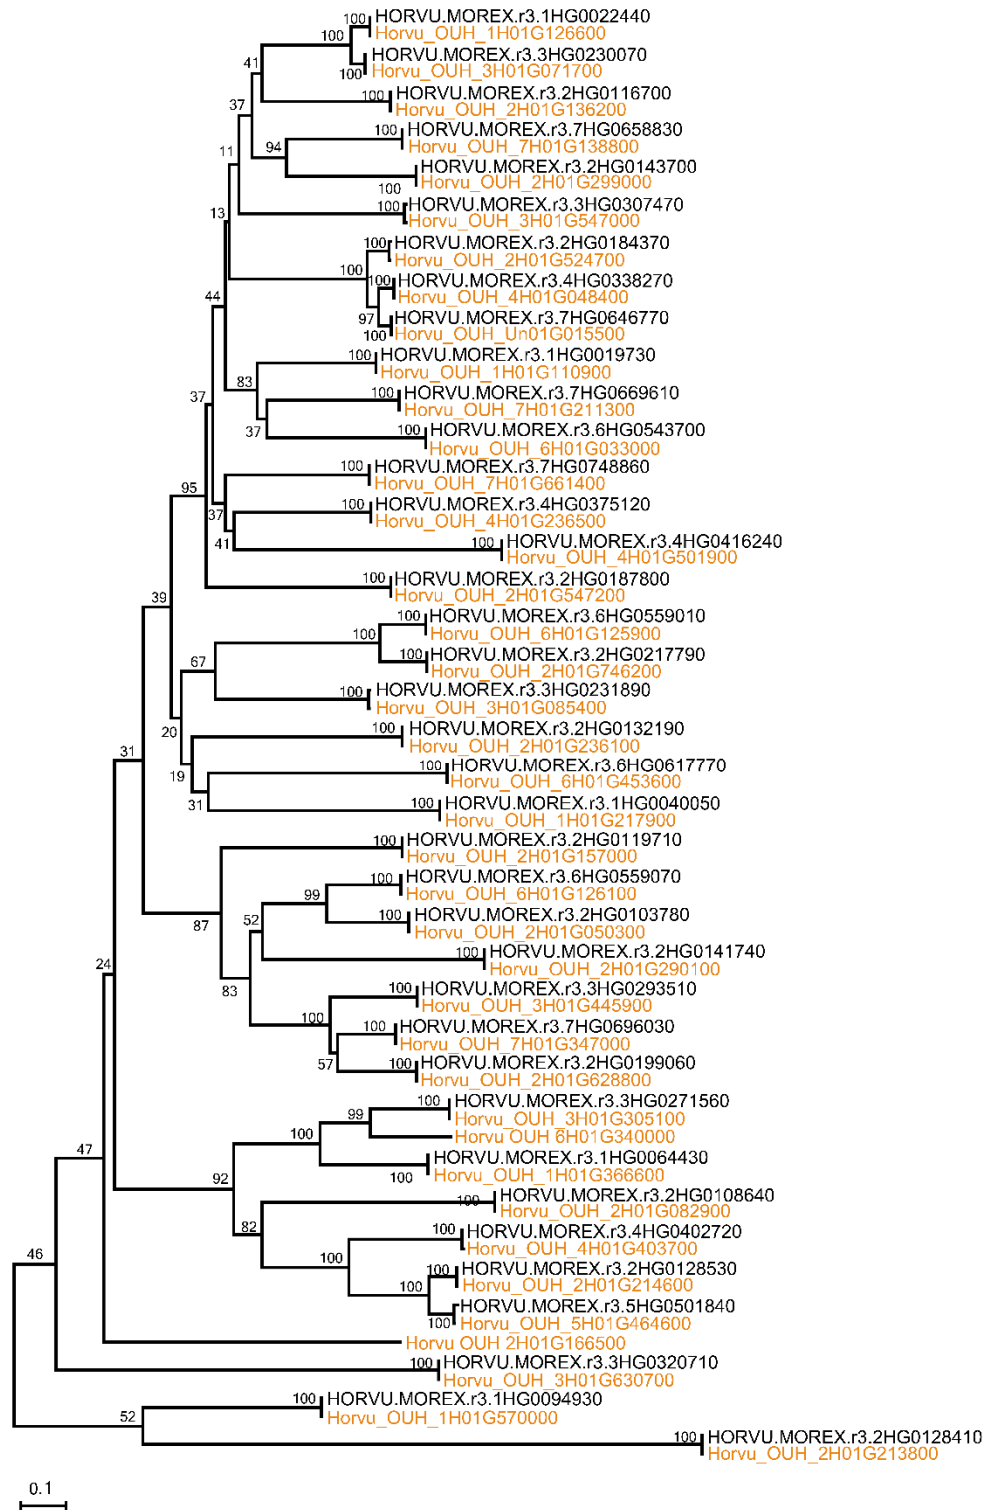

**Figure S2.** Phylogeny of Snf2 family proteins from wild (OUH602, orange text) and cultivated (Morex, black text) barley. The neighbor-joining tree was constructed with CLUSTALW in MEGA7 software on the basis of an alignment of full-length amino acid sequences. Bootstrap probabilities are shown at each branch node.
