# Supplementary material for: Genome-Wide Analysis of Snf2 Gene Family Reveals Potential Role in Regulation of Spike Development in Barley
Source: Int J Mol Sci. 2022 Dec 27;24(1):457. doi: 10.3390/ijms24010457 (PMC9820626; doi:10.3390/ijms24010457)
Supplement: Supplementary file 1 [file ijms-24-00457-s001.zip › Supplementary tables.xlsx]

## Sheet: Table S1
Table S1. Physicochemical properties of barley Snf2 proteins.
Gene ID in Morex genome	Gene start	Gene end	Protein length (aa)	Molecular weight (kDa)	Isoelectric point (pI)	GRAVYa	Subcellular localization
HORVU.MOREX.r3.1HG0019730	70474449	70489874	1102	125.534	6.0082	-0.640381	nucleus
HORVU.MOREX.r3.1HG0022440	83456192	83466831	1108	127.45	5.00853	-0.887274	nucleus
HORVU.MOREX.r3.1HG0040050	253479457	253498390	1488	168.57	5.53805	-0.656586	nucleus
HORVU.MOREX.r3.1HG0064430	423600640	423606092	1482	165.691	5.67266	-0.779825	nucleus
HORVU.MOREX.r3.1HG0094930	514900094	514913509	2069	229.371	5.71762	-0.21595	nucleus
HORVU.MOREX.r3.2HG0103780	16941931	16947775	1164	129.923	8.35128	-0.30988	nucleus
HORVU.MOREX.r3.2HG0108640	28217525	28222573	1264	144.378	8.41522	-0.468987	nucleus
HORVU.MOREX.r3.2HG0116700	55126477	55143094	1731	196.626	5.57477	-0.869266	nucleus
HORVU.MOREX.r3.2HG0119710	68250274	68254466	822	90.7551	8.66609	-0.257786	nucleus
HORVU.MOREX.r3.2HG0128410	116565300	116594447	1161	130.577	8.84792	-0.344444	nucleus
HORVU.MOREX.r3.2HG0128530	117564542	117569474	937	105.931	6.34835	-0.459872	nucleus
HORVU.MOREX.r3.2HG0132190	146767990	146774670	868	98.4056	8.76372	-0.517396	nucleus
HORVU.MOREX.r3.2HG0141740	220294018	220301018	838	94.0542	8.5439	-0.466826	nucleus
HORVU.MOREX.r3.2HG0143700	239845091	239858120	2253	250.8	6.42691	-0.625033	nucleus
HORVU.MOREX.r3.2HG0184370	569093522	569101758	787	89.6951	5.79108	-0.396188	nucleus
HORVU.MOREX.r3.2HG0187800	588636228	588643061	874	97.8923	5.33029	-0.493593	nucleus
HORVU.MOREX.r3.2HG0199060	621597750	621604059	1049	115.296	5.62595	-0.386654	nucleus
HORVU.MOREX.r3.2HG0217790	664579062	664586088	1127	125.298	6.14177	-0.548181	nucleus
HORVU.MOREX.r3.3HG0230070	22469644	22477796	1145	130.856	6.64705	-0.799913	nucleus
HORVU.MOREX.r3.3HG0231890	27704026	27709416	1220	135.071	7.93646	-0.605328	nucleus
HORVU.MOREX.r3.3HG0271560	364543469	364548182	1272	141.44	4.83349	-0.731761	nucleus
HORVU.MOREX.r3.3HG0293510	509732468	509742368	1270	140.098	5.14331	-0.49126	nucleus
HORVU.MOREX.r3.3HG0307470	564819192	564830835	1185	134.674	6.85836	-0.556371	nucleus
HORVU.MOREX.r3.3HG0320710	597709276	597715274	1295	144.445	8.32586	-0.324324	nucleus
HORVU.MOREX.r3.4HG0338270	22165167	22171178	826	92.9204	6.13917	-0.451937	nucleus
HORVU.MOREX.r3.4HG0375120	356531917	356544388	1496	170.694	7.47166	-0.577473	nucleus
HORVU.MOREX.r3.4HG0402720	561791256	561796034	970	110.465	5.89912	-0.510206	nucleus
HORVU.MOREX.r3.4HG0416240	604202142	604216997	882	99.1585	6.39325	-0.272789	nucleus
HORVU.MOREX.r3.5HG0501840	508164314	508170993	955	107.933	5.6883	-0.476126	nucleus
HORVU.MOREX.r3.6HG0543700	13430839	13442248	2214	247.926	8.87709	-0.894715	nucleus
HORVU.MOREX.r3.6HG0559010	62400363	62407773	681	77.2095	6.43379	-0.313656	nucleus
HORVU.MOREX.r3.6HG0559070	62692027	62705149	1029	113.371	8.41246	-0.304762	nucleus
HORVU.MOREX.r3.6HG0617770	517870572	517885095	977	108.475	6.01974	-0.523746	nucleus
HORVU.MOREX.r3.7HG0646770	22383744	22389436	785	88.8798	6.01178	-0.469299	nucleus
HORVU.MOREX.r3.7HG0658830	58032440	58051349	1333	152.507	5.5386	-0.666242	nucleus
HORVU.MOREX.r3.7HG0669610	109813283	109835482	3440	370.703	5.21144	-0.64	nucleus
HORVU.MOREX.r3.7HG0696030	340000810	340025362	1047	115.631	6.86446	-0.50191	nucleus
HORVU.MOREX.r3.7HG0748860	622184098	622197058	2160	244.913	5.1397	-0.668102	nucleus
aGRAVY: grand average of hydrophobicity

## Sheet: Table S2
Table S2. Duplications of Snf2 gene family in barley, Arabidopsis, and rice.
Query	Subject	Identity	Match (bp)	Query_start (bp)	Query_end (bp)	Subject_start (bp)	Subject_end (bp)	Query_length (bp)	Subject_length (bp)	Query_chr	Subject_chr
Barley
HORVU.MOREX.r3.1HG0022440	HORVU.MOREX.r3.3HG0230070	82.152	2863	352	3202	262	3112	3327	3438	chr1H	chr3H
HORVU.MOREX.r3.2HG0128530	HORVU.MOREX.r3.5HG0501840	86.036	2041	783	2814	846	2868	2814	2868	chr2H	chr5H
HORVU.MOREX.r3.2HG0184370	HORVU.MOREX.r3.7HG0646770	85.661	2141	232	2364	229	2358	2364	2358	chr2H	chr7H
HORVU.MOREX.r3.2HG0184370	HORVU.MOREX.r3.4HG0338270	84.524	2184	194	2364	308	2481	2364	2481	chr2H	chr4H
HORVU.MOREX.r3.4HG0338270	HORVU.MOREX.r3.7HG0646770	87.279	2154	344	2481	227	2358	2481	2358	chr4H	chr7H
Arabidopsis
AtCHR12 (AT3G06010)	AtCHR23 (AT5G19310)	83.049	2932	45	2963	29	2906	3309	3195	chr3	chr5
AtCHR11 (AT3G06400)	AtCHR17 (AT5G18620)	87.713	3166	18	3168	30	3188	3168	3210	chr3	chr5
Ricre
OsCHR727 (Os05g01503000)	OsCHR728 (Os01g0367900)	84.381	3086	100	3154	259	3322	3324	3477	chr1	chr5
OsCHR741 (Os03g0722400)	OsCHR746 (Os09g0442700)	94.09	2521	33	2550	24	2538	2550	2538	chr3	chr9
OsCHR736 (Os07g0434500)	OsCHR737 (Os06g025570)	96.61	2861	15	2854	45	2899	2856	2901	chr6	chr7

## Sheet: Table S3
Table S3. Ka/Ks ratios of segmental duplication gene pairs in barley.
Gene pairs		Ka	Ks	Ka/Ks	Selective pressure
HORVU.MOREX.r3.1HG0022440	HORVU.MOREX.r3.3HG0230070	0.102031	1.78621	0.0571217	purifying selection
HORVU.MOREX.r3.2HG0128530	HORVU.MOREX.r3.5HG0501840	0.124093	0.287753	0.43125	purifying selection
HORVU.MOREX.r3.2HG0184370	HORVU.MOREX.r3.7HG0646770	0.103349	0.574736	0.179819	purifying selection
HORVU.MOREX.r3.2HG0184370	HORVU.MOREX.r3.4HG0338270	0.102025	0.563245	0.181138	purifying selection
HORVU.MOREX.r3.4HG0338270	HORVU.MOREX.r3.7HG0646770	0.0916429	0.403365	0.227196	purifying selection

## Sheet: Table S4
Table S4. Snf2 family genes among 20 barley accessions.
Group	Subfamily	Morex (this study)			Akashinriki			Barke			Golden_Promise			Hockett			HOR_10350			HOR_13821			HOR_13942			HOR_21599			HOR_3081			HOR_3365			HOR_7552			HOR_8148			HOR_9043			Igri			OUN333
		Gene ID	Gene coding sequence from genome anotation	Alignment in genome	Gene ID	Gene coding sequence from genome anotation	Alignment in genome	Gene ID	Gene coding sequence from genome anotation	Alignment in genome	Gene ID	Gene coding sequence from genome anotation	Alignment in genome	Gene ID	Gene coding sequence from genome anotation	Alignment in genome	Gene ID	Gene coding sequence from genome anotation	Alignment in genome	Gene ID	Gene coding sequence from genome anotation	Alignment in genome	Gene ID	Gene coding sequence from genome anotation	Alignment in genome	Gene ID	Gene coding sequence from genome anotation	Alignment in genome	Gene ID	Gene coding sequence from genome anotation	Alignment in genome	Gene ID	Gene coding sequence from genome anotation	Alignment in genome	Gene ID	Gene coding sequence from genome anotation	Alignment in genome	Gene ID	Gene coding sequence from genome anotation	Alignment in genome	Gene ID	Gene coding sequence from genome anotation	Alignment in genome	Gene ID	Gene coding sequence from genome anotation	Alignment in genome	Gene ID	Gene coding sequence from genome annotation	Alignment in genome
Snf2-like	Snf2_1	HORVU.MOREX.r3.7HG0669610	ATGGCTTCATCACAGCATGTTGAAGTGGAGGCTGCGAAGCTACTTCAAAAACTCATTCTGGAATCGAAGGATGAGCCTGCTAAATTAGCAACAAAACTTTACGTGATATGTCAACATATGAAGTTAAGTGGAAAAGAGCAGTCTCTTCCTTATCAGGTCATATCTAGGGCCATGGAGACTGTTGTAAGTCAACATGGAATTGACATGGATGCATTGCGATCATCACGAGTTCCATTTTCTGGCGGTACACAAGCAGTAGATGCTAGTGGCGTTATGTCGAAGGATAAGGAGATCATTGGTGGTCAGTCTTCCATGGTTGGAAGTGATGCATCCCAGAGCAGCGGTCAAGCTGCATTATGGCATTTGCCACCAGGTTCAGCAGATATGACAAGGCCTGGG…	chr7:109813283-109835482	Horvu_AKASHIN_7H01G214100	ATGGCTTCATCACAGCATGTTGAAGTGGAGGCTGCGAAGCTACTTCAAAAACTCATTCTGGAATCGAAGGATGAGCCTGCTAAATTAGCAACAAAACTTTACGTGATATGTCAACATATGAAGTTAAGTGGAAAAGAGCAGTCTCTTCCTTATCAGGTCATATCTAGGGCCATGGAGACTGTTGTAAGTCAACATGGAATTGACATGGATGCATTGCGATCATCACGAGTTCCATTTTCTGGCGGTACACAAGCAGTAGATGCTAGTGGCGTTATGTCGAAGGATAAGGAGATCATTGGTGGTCAGTCTTCCATGGTTGGAAGTGATGCATCCCAGAGCAGCGGTCAAGCTGCATTATGGCATTTGCCACCAGGCAGGGTTCCAGCAGGAAATAGGGGT…	chr7H:109563635-109584343	Horvu_BARKE_7H01G229200	ATGGCTTCATCACAGCATGTTGAAGTGGAGGCTGCGAAGCTACTTCAAAAACTCATTCTGGAATCAAAGGATGAGCCTGCTAAATTAGCAACAAAACTTTACGTGATATGTCAACATATGAAGTTAAGTGGAAAAGAGCAGTCTCTTCCTTATCAGGTCATATCTAGGGCCATGGAGACTGTTGTAAGTCAACATGGAATTGACATGGATGCATTGCGATCATCACGAGTTCCATTTTCTGGCGGTACACAAGCAGTAGATGCTAGTGGCGTTATGTCGAAGGATAAGGAGATCATTGGTGGTCAGTCTTCCATGGTTGGAAGTGATGCATCCCAGAGCAGCGGTCAAGCTGCATTATGGCATTTGCCACCAGGCAGGGTTCCAGCAGGAAATAGGGGT…	chr7H:105715986-105736701	Horvu_GOLDEN_7H01G199000	ATGGCTTCATCACAGCATGTTGAAGTGGAGGCTGCGAAGCTACTTCAAAAACTCATTCTGGAATCAAAGGATGAGCCTGCTAAATTAGCAACAAAACTTTACGTGATATGTCAACATATGAAGTTAAGTGGAAAAGAGCAGTCTCTTCCTTATCAGGTCATATCTAGGGCCATGGAGACTGTTGTAAGTCAACATGGAATTGACATGGATGCATTGCGATCATCACGAGTTCCATTTTCTGGCGGTACACAAGCAGTAGATGCTAGTGGCGTTATGTCGAAGGATAAGGAGATCATTGGTGGTCAGTCTTCCATGGTTGGAAGTGATGCATCCCAGAGCAGCGGTCAAGCTGCATTATGGCATTTGCCACCAGGCAGGGTTCCAGCAGGAAATAGGGGT…	chr7H:93909893-93930608	Horvu_HOCKETT_7H01G211800	ATGGCTTCATCACAGCATGTTGAAGTGGAGGCTGCGAAGCTACTTCAAAAACTCATTCTGGAATCAAAGGATGAGCCTGCTAAATTAGCAACAAAACTTTACGTGATATGTCAACATATGAAGTTAAGTGGAAAAGAGCAGTCTCTTCCTTATCAGGTCATATCTAGGGCCATGGAGACTGTTGTAAGTCAACATGGAATTGACATGGATGCATTGCGATCATCACGAGTTCCATTTTCTGGCGGTACACAAGCAGTAGATGCTAGTGGCGTTATGTCGAAGGATAAGGAGATCATTGGTGGTCAGTCTTCCATGGTTGGAAGTGATGCATCCCAGAGCAGCGGTCAAGCTGCATTATGGCATTTGCCACCAGGCAGGGTTCCAGCAGGAAATAGGGGT…	chr7H:103585134-103605847	Horvu_10350_7H01G231000	ATGGCTTCATCACAGCATGTTGAAGTGGAGGCTGCGAAGCTACTTCAAAAACTCATTCTGGAATCAAAGGATGAGCCTGCTAAATTAGCAACAAAACTTTACGTGATATGTCAACATATGAAGTTAAGTGGAAAAGAGCAGTCTCTTCCTTATCAGGTCATATCTAGGGCCATGGAGACTGTTGTAAGTCAACATGGAATTGACATGGATGCATTGCGATCATCACGAGTTCCATTTTCTGGCGGTACACAAGCAGTAGATGCTAGTGGCGTTATGTCGAAGGATAAGGAGATCATTGGTGGTCAGTCTTCCATGGTTGGAAGTGATGCATCCCAGAGCAGCGGTCAAGCTGCATTATGGCATTTGCCACCAGGCAGGGTTCCAGCAGGAAATAGGGGT…	chr7H:107276017-107296732	Horvu_13821_7H01G215600	ATGGCTTCATCACAGCATGTTGAAGTGGAGGCTGCGAAGCTACTTCAAAAACTCATTCTGGAATCAAAGGATGAGCCTGCTAAATTAGCAACAAAACTTTACGTGATATGTCAACATATGAAGTTAAGTGGAAAAGAGCAGTCTCTTCCTTATCAGGTCATATCTAGGGCCATGGAGACTGTTGTAAGTCAACATGGAATTGACATGGATGCATTGCGATCATCACGAGTTCCATTTTCTGGCGGTACACAAGCAGTAGATGCTAGTGGCGTTATGTCGAAGGATAAGGAGATCATTGGTGGTCAGTCTTCCATGGTTGGAAGTGATGCATCCCAGAGCAGCGGTCAAGCTGCATTATGGCATTTGCCACCAGGCAGGGTTCCAGCAGGAAATAGGGGT…	chr7H:109232805-109253520	Horvu_13942_7H01G215600	ATGGCTTCATCACAGCATGTTGAAGTGGAGGCTGCGAAGCTACTTCAAAAACTCATTCTGGAATCAAAGGATGAGCCTGCTAAATTAGCAACAAAACTTTACGTGATATGTCAACATATGAAGTTAAGTGGAAAAGAGCAGTCTCTTCCTTATCAGGTCATATCTAGGGCCATGGAGACTGTTGTAAGTCAACATGGAATTGACATGGATGCATTGCGATCATCACGAGTTCCATTTTCTGGCGGTACACAAGCAGTAGATGCTAGTGGCGTTATGTCGAAGGATAAGGAGATCATTGGTGGTCAGTCTTCCATGGTTGGAAGTGATGCATCCCAGAGCAGCGGTCAAGCTGCATTATGGCATTTGCCACCAGGCAGGGTTCCAGCAGGAAATAGGGGT…	chr7H:107130120-107150844	Horvu_21599_7H01G225700	ATGGCTTCATCACAGCATGTTGAAGTGGAGGCTGCGAAGCTACTTCAAAAACTCATTCTGGAATCAAAGGATGAGCCTGCTAAATTAGCAACAAAACTTTACGTGATATGTCAACATATGAAGTTAAGTGGAAAAGAGCAGTCTCTTCCTTATCAGGTCATATCTAGGGCCATGGAGACTGTTGTAAGTCAACATGGAATTGACATGGATGCATTGCGATCATCACGAGTTCCATTTTCTGGCGGTACACAAGCAGTAGATGCTAGTGGCGTTATGTCGAAGGATAAGGAGATCATTGGTGGTCAGTCTTCCATGGTTGGAAGTGATGCATCCCAGAGCAGCGGTCAAGCTGCATTATGGCATTTGCCACCAGGCAGGGTTCCAGCAGGAAATAGGGGT…	chr7H:115857412-115878149	Horvu_3081_7H01G223100	ATGGCTTCATCACAGCATGTTGAAGTGGAGGCTGCGAAGCTACTTCAAAAACTCATTCTGGAATCAAAGGATGAGCCTGCTAAATTAGCAACAAAACTTTACGTGATATGTCAACATATGAAGTTAAGTGGAAAAGAGCAGTCTCTTCCTTATCAGGTCATATCTAGGGCCATGGAGACTGTTGTAAGTCAACATGGAATTGACATGGATGCATTGCGATCATCACGAGTTCCATTTTCTGGCGGTACACAAGCAGTAGATGCTAGTGGCGTTATGTCGAAGGATAAGGAGATCATTGGTGGTCAGTCTTCCATGGTTGGAAGTGATGCATCCCAGAGCAGCGGTCAAGCTGCATTATGGCATTTGCCACCAGGCAGGGTTCCAGCAGGAAATAGGGGT…	chr7H:107079074-107099795	Horvu_HHOR_7H01G221600	ATGGCTTCATCACAGCATGTTGAAGTGGAGGCTGCGAAGCTACTTCAAAAACTCATTCTGGAATCGAAGGATGAGCCTGCTAAATTAGCAACAAAACTTTACGTGATATGTCAACATATGAAGTTAAGTGGAAAAGAGCAGTCTCTTCCTTATCAGGTCATATCTAGGGCCATGGAGACTGTTGTAAGTCAACATGGAATTGACATGGATGCATTGCGATCATCACGAGTTCCATTTTCTGGCGGTACACAAGCAGTAGATGCTAGTGGCGTTATGTCGAAGGATAAGGAGATCATTGGTGGTCAGTCTTCCATGGTTGGAAGTGATGCATCCCAGAGCAGCGGTCAAGCTGCATTATGGCATTTGCCACCAGGCAGGGTTCCAGCAGGAAATAGGGGT…	chr7H:118864755-118885465	Horvu_7552_7H01G218800	ATGGCTTCATCACAGCATGTTGAAGTGGAGGCTGCGAAGCTACTTCAAAAACTCATTCTGGAATCGAAGGATGAGCCTGCTAAATTAGCAACAAAACTTTACGTGATATGTCAACATATGAAGTTAAGTGGAAAAGAGCAGTCTCTTCCTTATCAGGTCATATCTAGGGCCATGGAGACTGTTGTAAGTCAACATGGAATTGACATGGATGCATTGCGATCATCACGAGTTCCATTTTCTGGCGGTACACAAGCAGTAGATGCTAGTGGCGTTATGTCGAAGGATAAGGAGATCATTGGTGGTCAGTCTTCCATGGTTGGAAGTGATGCATCCCAGAGCAGCGGTCAAGCTGCATTATGGCATTTGCCACCAGGCAGGGTTCCAGCAGGAAATAGGGGT…	chr7H:108026642-108047352	Horvu_8148_7H01G219300	ATGGCTTCATCACAGCATGTTGAAGTGGAGGCTGCGAAGCTACTTCAAAAACTCATTCTGGAATCAAAGGATGAGCCTGCTAAATTAGCAACAAAACTTTACGTGATATGTCAACATATGAAGTTAAGTGGAAAAGAGCAGTCTCTTCCTTATCAGGTCATATCTAGGGCCATGGAGACTGTTGTAAGTCAACATGGAATTGACATGGATGCATTGCGATCATCACGAGTTCCATTTTCTGGCGGTACACAAGCAGTAGATGCTAGTGGCGTTATGTCGAAGGATAAGGAGATCATTGGTGGTCAGTCTTCCATGGTTGGAAGTGATGCATCCCAGAGCAGCGGTCAAGCTGCATTATGGCATTTGCCACCAGGCAGGGTTCCAGCAGGAAATAGGGGT…	chr7H:105747073-105767794	Horvu_9043_7H01G223900	ATGGCTTCATCACAGCATGTTGAAGTGGAGGCTGCGAAGCTACTTCAAAAACTCATTCTGGAATCAAAGGATGAGCCTGCTAAATTAGCAACAAAACTTTACGTGATATGTCAACATATGAAGTTAAGTGGAAAAGAGCAGTCTCTTCCTTATCAGGTCATATCTAGGGCCATGGAGACTGTTGTAAGTCAACATGGAATTGACATGGATGCATTGCGATCATCACGAGTTCCATTTTCTGGCGGTACACAAGCAGTAGATGCTAGTGGCGTTATGTCGAAGGATAAGGAGATCATTGGTGGTCAGTCTTCCATGGTTGGAAGTGATGCATCCCAGAGCAGCGGTCAAGCTGCATTATGGCATTTGCCACCAGGCAGGGTTCCAGCAGGAAATAGGGGT…	chr7H:109598537-109619252	Horvu_IGRI_7H01G218800	ATGGCTTCATCACAGCATGTTGAAGTGGAGGCTGCGAAGCTACTTCAAAAACTCATTCTGGAATCAAAGGATGAGCCTGCTAAATTAGCAACAAAACTTTACGTGATATGTCAACATATGAAGTTAAGTGGAAAAGAGCAGTCTCTTCCTTATCAGGTCATATCTAGGGCCATGGAGACTGTTGTAAGTCAACATGGAATTGACATGGATGCATTGCGATCATCACGAGTTCCATTTTCTGGCGGTACACAAGCAGTAGATGCTAGTGGCGTTATGTCGAAGGATAAGGAGATCATTGGTGGTCAGTCTTCCATGGTTGGAAGTGATGCATCCCAGAGCAGCGGTCAAGCTGCATTATGGCATTTGCCACCAGGCAGGGTTCCAGCAGGAAATAGGGGT…	chr7H:106857428-106878149	Horvu_OUN333_7H01G225500	ATGGCTTCATCACAGCATGTTGAAGTGGAGGCTGCGAAGCTACTTCAAAAACTCATTCTGGAATCGAAGGATGAGCCTGCTAAATTAGCAACAAAACTTTACGTGATATGTCAACATATGAAGTTAAGTGGAAAAGAGCAGTCTCTTCCTTATCAGGTCATATCTAGGGCCATGGAGACTGTTGTAAGTCAACATGGAATTGACATGGATGCATTGCGATCATCACGAGTTCCATTTTCTGGCGGTACACAAGCAGTAGATGCTAGTGGCGTTATGTCGAAGGATAAGGAGATCATTGGTGGTCAGTCTTCCATGGTTGGAAGTGATGCATCCCAGAGCAGCGGTCAAGCTGCATTATGGCATTTGCCACCAGGCAGGGTTCCAGCAGGAAATAGGGGT…	chr7H:115211422-115232132
	Snf2_2	HORVU.MOREX.r3.6HG0543700	ATGCTGCCCGGCGGGGCGCCGTCCGGCAGCTCGCCGGCGTCGTCTCCGCGGCCGGAGCAGACGCCCACGCCGTCGCAGCAGCAGCAGGCGCAGCACCTAGGGTTCGCCAGGAATCAGCAGGCGATGATGCATCAGCAGCAGCAGCAGCAGTCCTACCAGCCCGGTATGCCGCATGGTATGATGGGCGGAGGCGGCGGCTTCCCCCAGTCATCGGGCCCGATGGGGCCGTTCCAGGGTCAGAGGAGCCTGCCCCAGCCCGGTGGACCGCAGGGCCAGCAGTACAACCAGAGCACATTGCAGCAGCAGCAGGCGTACATGCAGTTTCTGATGCAGCAGCAGAAGTCCCATGGGATGCAACTCCAGCAGCAGCAGCAGCAGCAGCAGGCCAAAATGAATATG…	chr6:13430839-13442248	Horvu_AKASHIN_6H01G032000	ATGCTGCCCGGCGGGGCGCCGTCCGGCAGCTCGCCGGCGTCGTCTCCGCGGCCGGAGCAGACGCCCACGCCGTCGCAGCAGCAGCAGGCGCAGGCGCAGCACCTAGGGTTCGCCAGGAATCAGCAGGCGATGATGCATCAGCAGCAGCAGCAGCAGTCCTACCAGCCCGGTATGCCGCATGGTATGATGGGCGGAGGCGGCGGCTTCCCCCAGTCATCGGGCCCGATGGGGCCGTTCCAGGGTCAGAGGAGCCTGCCCCAGCCCGGTGGACCGCAGGGCCAGCAGTACAACCAGAGCACATTGCAGCAGCAGCAGGCGTACATGCAGTTTCTGATGCAGCAGCAGAAGTCCCATGGGATGCAACTCCAGCAGCAGCAGCAGCAGCAGCAGCAGGCCAAA…	chr6H:10273717-10284790	Horvu_BARKE_6H01G039600	ATGCTGCCCGGCGGGGCGCCGTCCGGCAGCTCGCCGGCGTCGTCTCCGCGGCCGGAGCAGACGCCCACGCCGTCGCAGCAGCAGCAGGCGCAGGCGCAGCACCTAGGGTTCGCCAGGAATCAGCAGGCGATGATGCATCAGCAGCAGCAGCAGCAGTCCTACCAGCCCGGTATGCCGCATGGTATGATGGGCGGAGGCGGCGGCTTCCCCCAGTCATCGGGCCCGATGGGGCCGTTCCAGGGTCAGAGGAGCCTGCCCCAGCCCGGTGGACCGCAGGGCCAGCAGTACAACCAGAGCACATTGCAGCAGCAGCAGGCGTACATGCAGTTTCTGATGCAGCAGCAGAAGTCCCATGGGATGCAACTCCAGCAGCAGCAGCAGCAGCAGCAGGCCAAAATG…	chr6H:11028199-11039289	Horvu_GOLDEN_6H01G029500	ATGCTGCCCGGCGGGGCGCCGTCCGGCAGCTCGCCGGCGTCGTCTCCGCGGCCGGAGCAGACGCCCACGCCGTCGCAGCAGCAGCAGGCGCAGGCGCAGCACCTAGGGTTCGCCAGGAATCAGCAGGCGATGATGCATCAGCAGCAGCAGCAGCAGTCCTACCAGCCCGGTATGCCGCATGGTATGATGGGCGGAGGCGGCGGCTTCCCCCAGTCATCGGGCCCGATGGGGCCGTTCCAGGGTCAGAGGAGCCTGCCCCAGCCCGGTGGACCGCAGGGCCAGCAGTACAACCAGAGCACATTGCAGCAGCAGCAGGCGTACATGCAGTTTCTGATGCAGCAGCAGAAGTCCCATGGGATGCAACTCCAGCAGCAGCAGCAGCAGCAGCAGGCCAAAATG…	chr6H:7355487-7366577	Horvu_HOCKETT_6H01G035600	ATGCTGCCCGGCGGGGCGCCGTCCGGCAGCTCGCCGGCGTCGTCTCCGCGGCCGGAGCAGACGCCCACGCCGTCGCAGCAGCAGCAGGCGCAGCACCTAGGGTTCGCCAGGAATCAGCAGGCGATGATGCATCAGCAGCAGCAGCAGCAGTCCTACCAGCCCGGTATGCCGCATGGTATGATGGGCGGAGGCGGCGGCTTCCCCCAGTCATCGGGCCCGATGGGGCCGTTCCAGGGTCAGAGGAGCCTGCCCCAGCCCGGTGGACCGCAGGGCCAGCAGTACAACCAGAGCACATTGCAGCAGCAGCAGGCGTACATGCAGTTTCTGATGCAGCAGCAGAAGTCCCATGGGATGCAACTCCAGCAGCAGCAGCAGCAGCAGCAGGCCAAAATGAATATG…	chr6H:9462267-9473328	Horvu_10350_6H01G037900	ATGCTGCCCGGCGGGGCGCCGTCCGGCAGCTCGCCGGCGTCGTCTCCGCGGCCGGAGCAGACGCCCACGCCGTCGCAGCAGCAGCAGGCGCAGCACCTAGGGTTCGCCAGGAATCAGCAGGCGATGATGCATCAGCAGCAGCAGCAGCAGTCCTACCAGCCCGGTATGCCGCATGGTATGATGGGCGGAGGCGGCGGCTTCCCCCAGTCATCGGGCCCGATGGGGCCGTTCCAGGGTCAGAGGAGCCTGCCCCAGCCCGGTGGACCGCAGGGCCAGCAGTACAACCAGAGCACATTGCAGCAGCAGCAGGCGTACATGCAGTTTCTGATGCAGCAGCAGAAGTCCCATGGGATGCAACTCCAGCAGCAGCAGCAGCAGCAGCAGGCCAAAATGAATATG…	chr6H:11136206-11147279	Horvu_13821_6H01G035800	ATGCTGCCCGGCGGGGCGCCGTCCGGCAGCTCGCCGGCGTCGTCTCCGCGGCCGGAGCAGACGCCCACGCCGTCGCAGCAGCAGCAGGCGCAGGCGCAGCACCTAGGGTTCGCCAGGAATCAGCAGGCGATGATGCATCAGCAGCAGCAGCAGCAGTCCTACCAGCCCGGTGTGCCGCATGGTATGATGGGCGGAGGCGGCGGCTTCCCCCAGTCATCGGGCCCGATGGGGCCGTTCCAGGGTCAGAGGAGCCTGCCCCAGCCCGGTGGACCGCAGGGCCAGCAGTACAACCAGAGCACATTGCAGCAGCAGCAGGCGTACATGCAGTTTCTGATGCAGCAGCAGAAGTCCCATGGGATGCAACTCCAGCAGCAGCAGCAGCAGCAGCAGGCCAAAATG…	chr6H:11011937-11023038	Horvu_13942_6H01G034200	ATGCTGCCCGGCGGGGCGCCGTCCGGCAGCTCGCCGGCGTCGTCTCCGCGGCCGGAGCAGACGCCCACGCCGTCGCAGCAGCAGCAGGCGCAGGCGCAGCACCTAGGGTTCGCCAGGAATCAGCAGGCGATGATGCATCAGCAGCAGCAGCAGCAGTCCTACCAGCCCGGTGTGCCGCATGGTATGATGGGCGGAGGCGGCGGCTTCCCCCAGTCATCGGGCCCGATGGGGCCGTTCCAGGGTCAGAGGAGCCTGCCCCAGCCCGGTGGACCGCAGGGCCAGCAGTACAACCAGAGCACATTGCAGCAGCAGCAGGCGTACATGCAGTTTCTGATGCAGCAGCAGAAGTCCCATGGGATGCAACTCCAGCAGCAGCAGCAGCAGCAGGCCAAAATGAAT…	chr6H:9395830-9406924	Horvu_21599_6H01G037400	ATGCTGCCCGGCGGGGCGCCGTCCGGCAGCTCGCCGGCGTCGTCTCCGCGGCCGGAGCAGACGCCCACGCCGTCGCAGCAGCAGCAGGCGCAGGCGCAGCACCTAGGGTTCGCCAGGAATCAGCAGGCGATGATGCATCAGCAGCAGCAGCAGCAGTCCTACCAGCCCGGTGTGCCGCATGGTATGATGGGCGGAGGCGGCGGCTTCCCCCAGTCATCGGGCCCGATGGGGCCGTTCCAGGGTCAGAGGAGCCTGCCCCAGCCCGGTGGACCGCAGGGCCAGCAGTACAACCAGAGCACATTGCAGCAGCAGCAGGCGTACATGCAGTTTCTGATGCAGCAGCAGAAGTCCCATGGGATGCAACTCCAGCAGCAGCAGCAGCAGCAGCAGGCCAAAATG…	chr6H:11242373-11253474	Horvu_3081_6H01G036500	ATGCTGCCCGGCGGGGCGCCGTCCGGCAGCTCGCCGGCGTCGTCTCCGCGGCCGGAGCAGACGCCCACGCCGTCGCAGCAGCAGCAGGCGCAGCACCTAGGGTTCGCCAGGAATCAGCAGGCGATGATGCATCAGCAGCAGCAGCAGCAGTCCTACCAGCCCGGTATGCCGCATGGTATGATGGGCGGAGGCGGCGGCTTCCCCCAGTCATCGGGCCCGATGGGGCCGTTCCAGGGTCAGAGGAGCCTGCCCCAGCCCGGTGGACCGCAGGGCCAGCAGTACAACCAGAGCACATTGCAGCAGCAGCAGGCGTACATGCAGTTTCTGATGCAGCAGCAGAAGTCCCATGGGATGCAACTCCAGCAGCAGCAGCAGCAGCAGCAGGCCAAAATGAATATG…	chr6H:11482806-11493884	Horvu_HHOR_6H01G034300	ATGCTGCCCGGCGGGGCGCCGTCCGGCAGCTCGCCGGCGTCGTCTCCGCGGCCGGAGCAGACGCCCACGCCGTCGCAGCAGCAGCAGGCGCAGCACCTAGGGTTCGCCAGGAATCAGCAGGCGATGATGCATCAGCAGCAGCAGCAGCAGTCCTACCAGCCCGGTATGCCGCATGGTATGATGGGCGGAGGCGGCGGCTTCCCCCAGTCATCGGGCCCGATGGGGCCGTTCCAGGGTCAGAGGAGCCTGCCCCAGCCCGGTGGACCGCAGGGCCAGCAGTACAACCAGAGCACATTGCAGCAGCAGCAGGCGTACATGCAGTTTCTGATGCAGCAGCAGAAGTCCCATGGGATGCAACTCCAGCAGCAGCAGCAGCAGCAGCAGGCCAAAATGAATATG…	chr6H:11216414-11227480	Horvu_7552_6H01G032500	ATGCTGCCCGGCGGGGCGCCGTCCGGCAGCTCGCCGGCGTCGTCTCCGCGGCCGGAGCAGACGCCCACGCCGTCGCAGCAGCAGCAGGCGCAGCACCTAGGGTTCGCCAGGAATCAGCAGGCGATGATGCATCAGCAGCAGCAGCAGCAGTCCTACCAGCCCGGTATGCCGCATGGTATGATGGGCGGAGGCGGCGGCTTCCCCCAGTCATCGGGCCCGATGGGGCCGTTCCAGGGTCAGAGGAGCCTGCCCCAGCCCGGTGGACCGCAGGGCCAGCAGTACAACCAGAGCACATTGCAGCAGCAGCAGGCGTACATGCAGTTTCTGATGCAGCAGCAGAAGTCCCATGGGATGCAACTCCAGCAGCAGCAGCAGCAGCAGCAGGCCAAAATGAATATG…	chr6H:10309593-10320656	Horvu_8148_6H01G040600	ATGCTGCCCGGCGGGGCGCCGTCCGGCAGCTCGCCGGCGTCGTCTCCGCGGCCGGAGCAGACGCCCACGCCGTCGCAGCAGCAGCAGGCGCAGCACCTAGGGTTCGCCAGGAATCAGGCGATGATGCATCAGCAGCAGCAGCAGCAGTCCTACCAGCCCGGTATGCCGCATGGTATGATGGGCGGAGGCGGCGGCTTCCCCCAGTCATCGGGCCCGATGGGGCCGTTCCAGGGTCAGAGGAGCCTGCCCCAGCCCGGTGGACCGCAGGGCCAGCAGTACAACCAGAGCACATTGCAGCAGCAGCAGGCGTACATGCAGTTTCTGATGCAGCAGCAGAAGTCCCATGGGATGCAACTCCAGCAGCAGCAGCAGCAGCAGCAGGCCAAAATGAATATGCCA…	chr6H:11837981-11849054	Horvu_9043_6H01G036000	ATGCTGCCCGGCGGGGCGCCGTCCGGCAGCTCGCCGGCGTCGTCTCCGCGGCCGGAGCAGACGCCCACGCCGTCGCAGCAGCAGCAGGCGCAGGCGCAGCACCTAGGGTTCGCCAGGAATCAGCAGGCGATGATGCATCAGCAGCAGCAGCAGCAGTCCTACCAGCCCGGTATGCCGCATGGTATGATGGGCGGAGGCGGCGGCTTCCCCCAGTCATCGGGCCCGATGGGGCCGTTCCAGGGTCAGAGGAGCCTGCCCCAGCCCGGTGGACCGCAGGGCCAGCAGTACAACCAGAGCACATTGCAGCAGCAGCAGGCGTACATGCAGTTTCTGATGCAGCAGCAGAAGTCCCATGGGATGCAACTCCAGCAGCAGCAGCAGCAGCAGCAGGCCAAAATG…	chr6H:11659890-11670995	Horvu_IGRI_6H01G035900	ATGCTGCCCGGCGGGGCGCCGTCCGGCAGCTCGCCGGCGTCGTCTCCGCGGCCGGAGCAGACGCCCACGCCGTCGCAGCAGCAGCAGGCGCAGCACCTAGGGTTCGCCAGGAATCAGCAGGCGATGATGCATCAGCAGCAGCAGCAGCAGTCCTACCAGCCCGGTATGCCGCATGGTATGATGGGCGGAGGCGGCGGCTTCCCCCAGTCATCGGGCCCGATGGGGCCGTTCCAGGGTCAGAGGAGCCTGCCCCAGCCCGGTGGACCGCAGGGCCAGCAGTACAACCAGAGCACATTGCAGCAGCAGCAGGCGTACATGCAGTTTCTGATGCAGCAGCAGAAGTCCCATGGGATGCAACTCCAGCAGCAGCAGCAGCAGCAGCAGGCCAAAATGAATATG…	chr6H:11141837-11152912	Horvu_OUN333_6H01G035300	ATGCTGCCCGGCGGGGCGCCGTCCGGCAGCTCGCCGGCGTCGTCTCCGCGGCCGGAGCAGACGCCCACGCCGTCGCAGCAGCAGCAGGCGCAGGCGCAGCACCTAGGGTTCGCCAGGAATCAGCAGGCGATGATGCATCAGCAGCAGCAGCAGCAGTCCTACCAGCCCGGTATGCCGCATGGTATGATGGGCGGAGGCGGCGGCTTCCCCCAGTCATCGGGCCCGATGGGGCCGTTCCAGGGTCAGAGGAGCCTGCCCCAGCCCGGTGGACCGCAGGGCCAGCAGTACAACCAGAGCACATTGCAGCAGCAGCAGGCGTACATGCAGTTTCTGATGCAGCAGCAGAAGTCCCATGGGATGCAACTCCAGCAGCAGCAGCAGCAGCAGCAGCAGGCCAAA…	chr6H:11030135-11041208
	Snf2_3	HORVU.MOREX.r3.1HG0019730	ATGGCGGCGTCCGTGGACGCGGCCGCGCCTGCTCCCCCGCCGCCCGTCGCCGCGCCCGAGGAGGCCGGCGGGGGCGACGTGGAGCAGGCCAGGATCCTCATCGGCGCGCTCAACCTGCTATCGCGCAACCTCCCGCTGCCACCCGCCGTCCTGTGCGCGGTCTCGTCCATCTACAACCACGGCGGTGAAGACGCGGGGGACGAGGATGAGGTGGATGAGGAAGGGGCCGAGGGCCCGGCGCTGGTCGGGGATGAAGGCCAAGGGGGGGATCCCGCTAACGCCGTCGGTGCGGCCGAGGAAGCCACCTTGATTCAAGACCTTGAAGATTCTATATATAGGAACCAAATGACGCACATGTCTTCCTCAAAGTTGACTGCTCTAAAAGAAGAACGCTTCAAT…	chr1:70474449-70489874	Horvu_AKASHIN_1H01G114600	ATGGCGGCGTCCGTGGACGCGGCCGCGCCTGCTCCCCCGCCGCCCGTCGCCGCGCCCGAGGAGGCCGGCGGGGGCGACGTGGAGCAGGCCAGGATCCTCATCGGCGCGCTCAACCTGCTATCGCGCAACCTCCCGCTGCCACCCGCCGTCCTGCGCGCGGTCTCGTCCATCTACAACCACGGCGGTGAAGACGCGGGGGACGAGGATGAGGTGGATGAGGAAGGGGCCGAGGGCCCGGCGCTGGTCGGGGATGAAGGCCAAGGGGGGGATCCCGCTAACGCCGTCGGTGCGGCCGAGGAAGCCACCTTGATTCAAGACCTTGAAGATTCTATATATAGGAACCAAATGACGCACATGTCTTCCTCAAAGTTGACTGCTCTAAAAGAAGAACGCTTCAAT…	chr1H:71848352-71863426	Horvu_BARKE_1H01G124900	ATGGCGGCGTCCGTGGACGCGGCCGCGCCTGCTCCCCCGCCGCCCGTCGCCGCGCCCGAGGAGGCCGGCGGGGGCGACGTGGAGCAGGCCAGGATCCTCATCGGCGCGCTCAACCTGCTATCGCGCAACCTCCCGCTGCCACCCGCCGTCCTGCGCGCGGTCTCGTCCATCTACAACCACGGCGGTGAAGACGCGGGGGACGAGGATGAGGTGGATGAGGAAGGGGCCGAGGGCCCGGCGCTGGTCGGGGATGAAGGCCAAGGGGGGGATCCCGCTAACGCCGTCGGTGCGGCCGAGGAAGCCACCTTGATTCAAGACCTTGAAGATTCTATATATAGGAACCAAATGACGCACATGTCTTCCTCAAAGTTGACTGCTCTAAAAGAAGAACGCTTCAAT…	chr1H:72041838-72056888	Horvu_GOLDEN_1H01G091700	ATGGCGGCGTCCGTGGACGCGGCCGCGCCTGCTCCCCCGCCGCCCGTCGCCGCGCCCGAGGAGGCCGGCGGGGGCGACGTGGAGCAGGCCAGGATCCTCATCGGCGCGCTCAACCTGCTATCGCGCAACCTCCCGCTGCCACCCGCCGTCCTGCGCGCGGTCTCGTCCATCTACAACCACGGCGGTGAAGACGCGGGGGACGAGGATGAGGTGGATGAGGAAGGGGCCGAGGGCCCGGCGCTGGTCGGGGATGAAGGCCAAGGGGGGGATCCCGCTAACGCCGTCGGTGCGGCCGAGGAAGCCACCTTGATTCAAGACCTTGAAGATTCTATATATAGGAACCAAATGACGCACATGTCTTCCTCAAAGTTGACTGCTCTAAAAGAAGAACGCTTCAAT…	chr1H:55812183-55827233	Horvu_HOCKETT_1H01G111000	ATGGCGGCGTCCGTGGACGCGGCCGCGCCTGCTCCCCCGCCGCCCGTCGCCGCGCCCGAGGAGGCCGGCGGGGGCGACGTGGAGCAGGCCAGGATCCTCATCGGCGCGCTCAACCTGCTATCGCGCAACCTCCCGCTGCCACCCGCCGTCCTGCGCGCGGTCTCGTCCATCTACAACCACGGCGGTGAAGACGCGGGGGACGAGGATGAGGTGGATGAGGAAGGGGCCGAGGGCCCGGCGCTGGTCGGGGATGAAGGCCAAGGGGGGGATCCCGCTAACGCCGTCGGTGCGGCCGAGGAAGCCACCTTGATTCAAGACCTTGAAGATTCTATATATAGGAACCAAATGACGCACATGTCTTCCTCAAAGTTGACTGCTCTAAAAGAAGAACGCTTCAAT…	chr1H:62013677-62028727	Horvu_10350_1H01G120700	ATGGCGGCGTCCGTGGACGCGGCCGCGCCTGCTCCCCCGCCGCCCGTCGCCGCGCCCGAGGAGGCCGGCGGGGGCGACGTGGAGCAGGCCAGGATCCTCATCGGCGCGCTCAACCTGCTATCGCGCAACCTCCCGCTGCCACCCGCCGTCCTGCGCGCGGTCTCGTCCATCTACAACCACGGCGGTGAAGACGCGGGGGACGAGGATGAGGTGGATGAGGAAGGGGCCGAGGGCCCGGCGCTGGTCGGGGATGAAGGCCAAGGGGGGGATCCCGCTAACGCCGTCGGTGCGGCCGAGGAAGCCACCTTGATTCAAGACCTTGAAGATTCTATATATAGGAACCAAATGACGCACATGTCTTCCTCAAAGTTGACTGCTCTAAAAGAAGAACGCTTCAAT…	chr1H:69234988-69250038	Horvu_13821_1H01G116100	ATGGCGGCGTCCGTGGACGCGGCCGCGCCTGCTCCCCCGCCGCCCGTCGCCGCGCCCGAGGAGGCCGGCGGGGGCGACGTGGAGCAGGCCAGGATCCTCATCGGCGCGCTCAACCTGCTATCGCGCAACCTCCCGCTGCCACCCGCCGTCCTGCGCGCGGTCTCGTCCATCTACAACCACGGCGGTGAAGACGCGGGGGACGAGGATGAGGTGGATGAGGAAGGGGCCGAGGGCCCGGCGCTGGTCGGGGATGAAGGCCAAGGGGGGGATCCCGCTAACGCCGTCGGTGCGGCCGAGGAAGCCACCTTGATTCAAGACCTTGAAGATTCTATATATAGGAACCAAATGACGCACATGTCTTCCTCAAAGTTGACTGCTCTAAAAGAAGAACGCTTCAAT…	chr1H:72221326-72236376	Horvu_13942_1H01G114400	ATGGCGGCGTCCGTGGACGCGGCCGCGCCTGCTCCCCCGCCGCCCGTCGCCGCGCCCGAGGAGGCCGGCGGGGGCGACGTGGAGCAGGCCAGGATCCTCATCGGCGCGCTCAACCTGCTATCGCGCAACCTCCCGCTGCCACCCGCCGTCCTGCGCGCGGTCTCGTCCATCTACAACCACGGCGGTGAAGACGCGGGGGACGAGGATGAGGTGGATGAGGAAGGGGCCGAGGGCCCGGCGCTGGTCGGGGATGAAGGCCAAGGGGGGGATCCCGCTAACGCCGTCGGTGCGGCCGAGGAAGCCACCTTGATTCAAGACCTTGAAGATTCTATATATAGGAACCAAATGACGCACATGTCTTCCTCAAAGTTGACTGCTCTAAAAGAAGAACGCTTCAAT…	chr1H:68425011-68440036	Horvu_21599_1H01G113500	ATGGCGGCGTCCGTGGACGCGGCCGCGCCTGCTCCCCCGCCGCCCGTCGCCGCGCCCGAGGAGGCCGGCGGGGGCGACGTGGAGCAGGCCAGGATCCTCATCGGCGCGCTCAACCTGCTATCGCGCAACCTCCCGCTGCCACCCGCCGTCCTGCGCGCGGTCTCGTCCATCTACAACCACGGCGGTGAAGACGCGGGGGACGAGGATGAGGTGGATGAGGAAGGGGCCGAGGGCCCGGCGCTGGTCGGGGATGAAGGCCAAGGGGGGGATCCCGCTAACGCCGTCGGTGCGGCCGAGGAAGCCACCTTGATTCAAGACCTTGAAGATTCTATATATAGGAACCAAATGACGCACATGTCTTCCTCAAAGTTGACTGCTCTAAAAGAAGAACGCTTCAAT…	chr1H:71178075-71193122	Horvu_3081_1H01G114300	ATGGCGGCGTCCGTGGACGCGGCCGCGCCTGCTCCCCCGCCGCCCGTCGCCGCGCCCGAGGAGGCCGGCGGGGGCGACGTGGAGCAGGCCAGGATCCTCATCGGCGCGCTCAACCTGCTATCGCGCAACCTCCCGCTGCCACCCGCCGTCCTGCGCGCGGTCTCGTCCATCTACAACCACGGCGGTCAAGACGCGGGGGACGAGGATGAGGTGGATGAGGAAGGGGCCGAGGGCCCGGCGCTGGTCGGGGATGAAGGCCAAGGGGGGGATCCCGCTAACGCCGTCGGTGCGGCCGAGGAAGCCACCTTGATTCAAGACCTTGAAGATTCTATATATAGGAACCAAATGACGCACATGTCTTCCTCAAAGTTGACTGCTCTAAAAGAAGAACGCTTCAAT…	chr1H:68884686-68899686	Horvu_HHOR_1H01G119000	ATGGCGGCGTCCGTGGACGCGGCCGCGCCTGCTCCCCCGCCGCCCGTCGCCGCGCCCGAGGAGGCCGGCGGGGGCGACGTGGAGCAGGCCAGGATCCTCATCGGCGCGCTCAACCTGCTATCGCGCAACCTCCCGCTGCCACCCGCCGTCCTGTGCGCGGTCTCGTCCATCTACAACCACGGCGGTGAAGACGCGGGGGACGAGGATGAGGTGGATGAGGAAGGGGCCGAGGGCCCGGCGCTGGTCGGGGATGAAGGCCAAGGGGGGGATCCCGCTAACGCCGTCGGTGCGGCCGAGGAAGCCACCTTGATTCAAGACCTTGAAGATTCTATATATAGGAACCAAATGACGCACATGTCTTCCTCAAAGTTGACTGCTCTAAAAGAAGAACGCTTCAAT…	chr1H:76665862-76680909	Horvu_7552_1H01G119300	ATGGCGGCGTCCGTGGACGCGGCCGCGCCTGCTCCCCCGCCGCCCGTCGCCGCGCCCGAGGAGGCCGGCGGGGGCGACGTGGAGCAGGCCAGGATCCTCATCGGCGCGCTCAACCTGCTATCGCGCAACCTCCCGCTGCCACCCGCCGTCCTGCGCGCGGTCTCGTCCATCTACAACCACGGCGGTGAAGACGCGGGGGACGAGGATGAGGTGGATGAGGAAGGGGCCGAGGGCCCGGCGCTGGTCGGGGATGAAGGCCAAGGGGGGGATCCCGCTAACGCCGTCGGTGCGGCCGAGGAAGCCACCTTGATTCAAGACCTTGAAGATTCTATATATAGGAACCAAATGACGCACATGTCTTCCTCAAAGTTGACTGCTCTAAAAGAAGAACGCTTCAAT…	chr1H:70579369-70594419	Horvu_8148_1H01G116500	ATGGCGGCGTCCGTGGACGCGGCCGCGCCTGCTCCCCCGCCGCCCGTCGCCGCGCCCGAGGAGGCCGGCGGGGGCGACGTGGAGCAGGCCAGGATCCTCATCGGCGCGCTCAACCTGCTATCGCGCAACCTCCCGCTGCCACCCGCCGTCCTGCGCGCGGTCTCGTCCATCTACAACCACGGCGGTGAAGACGCGGGGGACGAGGATGAGGTGGATGAGGAAGGGGCCGAGGGCCCGGCGCTGGTCGGGGATGAAGGCCAAGGGGGGGATCCCGCTAACGCCGTCGGTGCGGCCGAGGAAGCCACCTTGATTCAAGACCTTGAAGATTCTATATATAGGAACCAAATGACGCACATGTCTTCCTCAAAGTTGACTGCTCTAAAAGAAGAACGCTTCAAT…	chr1H:70963942-70978992	Horvu_9043_1H01G116400	ATGGCGGCGTCCGTGGACGCGGCCGCGCCTGCTCCCCCGCCGCCCGTCGCCGCGCCCGAGGAGGCCGGCGGGGGCGACGTGGAGCAGGCCAGGATCCTCATCGGCGCGCTCAACCTGCTATCGCGCAACCTCCCGCTGCCACCCGCCGTCCTGCGCGCGGTCTCGTCCATCTACAACCACGGCGGTGAAGACGCGGGGGACGAGGATGAGGTGGATGAGGAAGGGGCCGAGGGCCCGGCGCTGGTCGGGGATGAAGGCCAAGGGGGGGATCCCGCTAACGCCGTCGGTGCGGCCGAGGAAGCCACCTTGATTCAAGACCTTGAAGATTCTATATATAGGAACCAAATGACGCACATGTCTTCCTCAAAGTTGACTGCTCTAAAAGAAGAACGCTTCAAT…	chr1H:67140470-67155520	Horvu_IGRI_1H01G114600	ATGGCGGCGTCCGTGGACGCGGCCGCGCCTGCTCCCCCGCCGCCCGTCGCCGCGCCCGAGGAGGCCGGCGGGGGCGACGTGGAGCAGGCCAGGATCCTCATCGGCGCGCTCAACCTGCTATCGCGCAACCTCCCGCTGCCACCCGCCGTCCTGCGCGCGGTCTCGTCCATCTACAACCACGGCGGTGAAGACGCGGGGGACGAGGATGAGGTGGATGAGGAAGGGGCCGAGGGCCCGGCGCTGGTCGGGGATGAAGGCCAAGGGGGGGATCCCGCTAACGCCGTCGGTGCGGCCGAGGAAGCCACCTTGATTCAAGACCTTGAAGATTCTATATATAGGAACCAAATGACGCACATGTCTTCCTCAAAGTTGACTGCTCTAAAAGAAGAACGCTTCAAT…	chr1H:69522447-69537497	Horvu_OUN333_1H01G116400	ATGGCGGCGTCCGTGGACGCGGCCGCGCCTGCTCCCCCGCCGCCCGTCGCCGCGCCCGAGGAGGCCGGCGGGGGCGACGTGGAGCAGGCCAGGATCCTCATCGGCGCGCTCAACCTGCTATCGCGCAACCTCCCGCTGCCACCCGCCGTCCTGCGCGCGGTCTCGTCCATCTACAACCACGGCGGTGAAGACGCGGGGGACGAGGATGAGGTGGATGAGGAAGGGGCCGAGGGCCCGGCGCTGGTCGGGGATGAAGGCCAAGGGGGGGATCCCGCTAACGCCGTCGGTGCGGCCGAGGAAGCCACCTTGATTCAAGACCTTGAAGATTCTATATATAGGAACCAAATGACGCACATGTCTTCCTCAAAGTTGACTGCTCTAAAAGAAGAACGCTTCAAT…	chr1H:72680617-72695691
	Lsh_1	HORVU.MOREX.r3.2HG0184370	ATGTTTGAAGCCGAGAATGAGAAAGCCAGTGATTTTGTTGATGCAAGTACGTCTCTGCCTGTTAAGCTTGAGTCCAGCTGCGTTGCCGTACTGGTACACCCCATTGTCGAGGTGTTGAAGGCTGAAGAGCAGCCATTGCACTCCACCAAAGAGACATCCGATGAGTTCTTGGATGCAAGTTCATCTGTACCTATTGACCTCGAGGCCAAGAATGATGATGCATCCTTCATTACAGAGGTGATGACGAAGGAGGAAGAGAAGTTATATGAGGCTCGGCTTATGGTTGAGGAAGAAGAAGCTAGAAAGAGAGAACAAGCTGCAAGACTTACTTTTGATCGTAATGCATGTTTTAGCAAGTTGGATGATCTACTGACAGAGACACAGCTTTATTCAGAATTT…	chr2:569093522-569101758	Horvu_AKASHIN_2H01G534300	ATGTTTGAAGCCGAGAATGAGAAAGCCAGTGATTTTGTTGATGCAAGTACGTCTCTGCCTGTTAAGCTTGAGTCCAGCTGCGTTGCCGTACTGGTACACCCCATTGTCGAGGTGTTGAAGGCTGAAGAGCAGCCATTGCACTCCACCAAAGAGACATCCGATGAGTTCTTGGATGCAAGTTCATCTGTACCTATTGACCTCGAGGCCAAGAATGATGATGCATCCTTCATTACAGAGGTGATGACGAAGGAGGAAGAGAAGTTATATGAGGCTCGGCTTATGGTTGAGGAAGAAGAAGCTAGAAAGAGAGAACAAGCTGCAAGACTTGCTTTTGATCGTAATGCATGTTTTAGCAAGTTGGATGATCTACTGACAGAGACACAGCTTTATTCAGAATTT…	chr2H:597247229-597255268	Horvu_BARKE_2H01G542700	ATGTTTGAAGCCGAGAATGAGAAAGCCAGTGATTTTGTTGATGCAAGTACGTCTCTGCCTGTTAAGCTTGAGTCCAGCTGCGTTGCCGTACTGGTACACCCCATTGTCGAGGTGTTGAAGGCTGAAGAGCAGCCATTGCACTCCACCAAAGAGACATCCGATGAGTTCTTGGATGCAAGTTCATCTGTACCTATTGACCTCGAGGCCAAGAATGATGATGCATCCTTCATTACAGAGGTGATGACGAAGGAGGAAGAGAAGTTATATGAGGCTCGGCTTATGGTTGAGGAAGAAGAAGCTAGAAAGAGAGAACAAGCTGCAAGACTTGCTTTTGATCGTAATGCATGTTTTAGCAAGTTGGATGATCTACTGACAGAGACACAGCTTTATTCAGAATTT…	chr2H:559956703-559964744	Horvu_GOLDEN_2H01G492500	ATGTTTGAAGCCGAGAATGAGAAAGCCAGTGATTTTGTTGATGCAAGTACGTCTCTGCCTGTTAAGCTTGAGTCCAGCTGCGTTGCCGTACTGGTACACCCCATTGTCGAGGTGTTGAAGGCTGAAGAGCAGCCATTGCACTCCACCAAAGAGACATCCGATGAGTTCTTGGATGCAAGTTCATCTGTACCTATTGACCTCGAGGCCAAGAATGATGATGCATCCTTCATTACAGAGGTGATGACGAAGGAGGAAGAGAAGTTATATGAGGCTCGGCTTATGGTTGAGGAAGAAGAAGCTAGAAAGAGAGAACAAGCTGCAAGACTTGCTTTTGATCGTAATGCATGTTTTAGCAAGTTGGATGATCTACTGACAGAGACACAGCTTTATTCAGAATTT…	chr2H:530037774-530045815	Horvu_HOCKETT_2H01G508800	ATGTTTGAAGCCGAGAATGAGAAAGCCAGTGATTTTGTTGATGCAAGTACGTCTCTGCCTGTTAAGCTTGAGTCCAGCTGCGTTGCCGTACTGGTACACCCCATTGTCGAGGTGTTGAAGGCTGAAGAGCAGCCATTGCACTCCACCAAAGAGACATCCGATGAGTTCTTGGATGCAAGTTCATCTGTACCTATTGACCTCGAGGCCAAGAATGATGATGCATCCTTCATTACAGAGGTGATGACGAAGGAGGAAGAGAAGTTATATGAGGCTCGGCTTATGGTTGAGGAAGAAGAAGCTAGAAAGAGAGAACAAGCTGCAAGACTTGCTTTTGATCGTAATGCATGTTTTAGCAAGTTGGATGATCTACTGACAGAGACACAGCTTTATTCAGAATTT…	chr2H:553570976-553579016	Horvu_10350_2H01G539000	ATGTTTGAAGCCGAGAATGAGAAAGCCAGTGATTTTGTTGATGCAAGTACGTCTCTGCCTGTTAAGCTTGAGTCCAGCTGCGTTGCCGTACTGGTACACCCCATTGTCGAGGTGTTGAAGGCTGAAGAGCAGCCATTGCACTCCACCAAAGAGACATCCGATGAGTTCTTGGATGCAAGTTCATCTGTACCTATTGACCTCGAGGCCAAGAATGATGATGCATCCTTCATTACAGAGGTGATGACGAAGGAGGAAGAGAAGTTATATGAGGCTCGGCTTATGGTTGAGGAAGAAGAAGCTAGAAAGAGAGAACAAGCTGCAAGACTTACTTTTGATCGTAATGCATGTTTTAGCAAGTTGGATGATCTACTGACAGAGACACAGCTTTATTCAGAATTT…	chr2H:560414007-560422243	Horvu_13821_2H01G534000	ATGTTTGAAGCCGAGAATGAGAAAGCCAGTGATTTTGTTGATGCAAGTACGTCTCTGCCTGTTAAGCTTGAGTCCAGCTGCGTTGCCGTACTGGTACACCCCATTGTCGAGGTGTTGAAGGCTGAAGAGCAGCCATTGCACTCCACCAAAGAGACATCCGATGAGTTCTTGGATGCAAGTTCATCTGTACCTATTGACCTCGAGGCCAAGAATGATGATGCATCCTTCATTACAGAGGTGATGACGAAGGAGGAAGAGAAGTTATATGAGGCTCGGCTTATGGTTGAGGAAGAAGAAGCTAGAAAGAGAGAACAAGCTGCAAGACTTGCTTTTGATCGTAATGCATGTTTTAGCAAGTTGGATGATCTACTGACAGAGACACAGCTTTATTCAGAATTT…	chr2H:587877456-587885497	Horvu_13942_2H01G532900	ATGTTTGAAGCCGAGAATGAGAAAGCCAGTGATTTTGTTGATGCAAGTACGTCTCTGCCTGTTAAGCTTGAGTCCAGCTGCGTTGCCGTACTGGTACACCCCATTGTCGAGGTGTTGAAGGCTGAAGAGCAGCCATTGCACTCCACCAAAGAGACATCCGATGAGTTCTTGGATGCAAGTTCATCTGTACCTATTGACCTCGAGGCCAAGAATGATGATGCATCCTTCATTACAGAGGTGATGACGAAGGAGGAAGAGAAGTTATATGAGGCTCGGCTTATGGTTGAGGAAGAAGAAGCTAGAAAGAGAGAACAAGCTGCAAGACTTACTTTTGATCGTAATGCATGTTTTAGCAAGTTGGATGATCTACTGACAGAGACACAGCTTTATTCAGAATTT…	chr2H:574766195-574774431	Horvu_21599_2H01G532900	ATGTTTGAAGCCGAGAATGAGAAAGCCAGTGATTTTGTTGATGCAAGTACGTCTCTGCCTGTTAAGCTTGAGTCCAGCTGCGTTGCCGTACTGGTACACCCCATTGTCGAGGTGTTGAAGGCTGAAGAGCAGCCATTGCACTCCACCAAAGAGACATCCGATGAGTTCTTGGATGCAAGTTCATCTGTACCTATTGACCTCGAGGCCAAGAATGATGATGCATCCTTCATTACAGAGGTGATGACGAAGGAGGAAGAGAAGTTATATGAGGCTCGGCTTATGGTTGAGGAAGAAGAAGCTAGAAAGAGAGAACAAGCTGCAAGACTTGCTTTTGATCGTAATGCATGTTTTAGCAAGTTGGATGATCTACTGACAGAGACACAGCTTTATTCAGAATTT…	chr2H:586931902-586939943	Horvu_3081_2H01G533700	ATGTTTGAAGCCGAGAATGAGAAAGCCAGTGATTTTGTTGATGCAAGTACGTCTCTGCCTGTTAAGCTTGAGTCCAGCTGCGTTGCCGTACTGGTACACCCCATTGTCGAGGTGTTGAAGGCTGAAGAGCAGCCATTGCACTCCACCAAAGAGACATCCGATGAGTTCTTGGATGCAAGTTCATCTGTACCTATTGACCTCGAGGCCAAGAATGATGATGCATCCTTCATTACAGAGGTGATGACGAAGGAGGAAGAGAAGTTATATGAGGCTCGGCTTATGGTTGAGGAAGAAGAAGCTAGAAAGAGAGAACAAGCTGCAAGACTTGCTTTTGATCGTAATGCATGTTTTAGCAAGTTGGATGATCTACTGACAGAGACACAGCTTTATTCAGAATTT…	chr2H:572002925-572011169	N/A	N/A	chr2H:612756992-612748757	Horvu_7552_2H01G534800	ATGTTTGAAGCCGAGAATGAGAAAGCCAGTGATTTTGTTGATGCAAGTACGTCTCTGCCTGTTAAGCTTGAGTCCAGCTGCGTTGCCGTACTGGTACACCCCATTGTCGAGGTGTTGAAGGCTGAAGAGCAGCCATTGCACTCCACCAAAGAGACATCCGATGAGTTCTTGGATGCAAGTTCATCTGTACCTATTGACCTCGAGGCCAAGAATGATGATGCATCCTTCATTACAGAGGTGATGACGAAGGAGGAAGAGAAGTTATATGAGGCTCGGCTTATGGTTGAGGAAGAAGAAGCTAGAAAGAGAGAACAAGCTGCAAGACTTACTTTTGATCGTAATGCATGTTTTAGCAAGTTGGATGATCTACTGACAGAGACACAGCTTTATTCAGAATTT…	chr2H:576524649-576532885	Horvu_8148_2H01G534300	ATGTTTGAAGCCGAGAATGAGAAAGCCAGTGATTTTGTTGATGCAAGTACGTCTCTGCCTGTTAAGCTTGAGTCCAGCTGCGTTGCCGTACTGGTACACCCCATTGTCGAGGTGTTGAAGGCTGAAGAGCAGCCATTGCACTCCACCAAAGAGACATCCGATGAGTTCTTGGATGCAAGTTCATCTGTACCTATTGACCTCGAGGCCAAGAATGATGATGCATCCTTCATTACAGAGGTGATGACGAAGGAGGAAGAGAAGTTATATGAGGCTCGGCTTATGGTTGAGGAAGAAGAAGCTAGAAAGAGAGAACAAGCTGCAAGACTTGCTTTTGATCGTAATGCATGTTTTAGCAAGTTGGATGATCTACTGACAGAGACACAGCTTTATTCAGAATTT…	chr2H:574688927-574696967	Horvu_9043_2H01G534100	ATGTTTGAAGCCGAGAATGAGAAAGCCAGTGATTTTGTTGATGCAAGTACGTCTCTGCCTGTTAAGCTTGAGTCCAGCTGCGTTGCCGTACTGGTACACCCCATTGTCGAGGTGTTGAAGGCTGAAGAGCAGCCATTGCACTCCACCAAAGAGACATCCGATGAGTTCTTGGATGCAAGTTCATCTGTACCTATTGACCTCGAGGCCAAGAATGATGATGCATCCTTCATTACAGAGGTGATGACGAAGGAGGAAGAGAAGTTATATGAGGCTCGGCTTATGGTTGAGGAAGAAGAAGCTAGAAAGAGAGAACAAGCTGCAAGACTTGCTTTTGATCGTAATGCATGTTTTAGCAAGTTGGATGATCTACTGACAGAGACACAGCTTTATTCAGAATTT…	chr2H:585033660-585041703	Horvu_IGRI_2H01G533400	ATGTTTGAAGCCGAGAATGAGAAAGCCAGTGATTTTGTTGATGCAAGTACGTCTCTGCCTGTTAAGCTTGAGTCCAGCTGCGTTGCCGTACTGGTACACCCCATTGTCGAGGTGTTGAAGGCTGAAGAGCAGCCATTGCACTCCACCAAAGAGACATCCGATGAGTTCTTGGATGCAAGTTCATCTGTACCTATTGACCTCGAGGCCAAGAATGATGATGCATCCTTCATTACAGAGGTGATGACGAAGGAGGAAGAGAAGTTATATGAGGCTCGGCTTATGGTTGAGGAAGAAGAAGCTAGAAAGAGAGAACAAGCTGCAAGACTTGCTTTTGATCGTAATGCATGTTTTAGCAAGTTGGATGATCTACTGACAGAGACACAGCTTTATTCAGAATTT…	chr2H:571211951-571219992	Horvu_OUN333_2H01G530600	ATGTTTGAAGCCGAGAATGAGAAAGCCAGTGATTTTGTTGATGCAAGTACGTCTCTGCCTGTTAAGCTTGAGTCCAGCTGCGTTGCCGTACTGGTACACCCCATTGTCGAGGTGTTGAAGGCTGAAGAGCAGCCATTGCACTCCACCAAAGAGACATCCGATGAGTTCTTGGATGCAAGTTCATCTGTACCTATTGACCTCGAGGCCAAGAATGATGATGCATCCTTCATTACAGAGGTGATGACGAAGGAGGAAGAGAAGTTATATGAGGCTCGGCTTATGGTTGAGGAAGAAGAAGCTAGAAAGAGAGAACAAGCTGCAAGACTTACTTTTGATCGTAATGCATGTTTTAGCAAGTTGGATGATCTACTGACAGAGACACAGCTTTATTCAGAATTT…	chr2H:595214445-595222681
	Lsh_2	HORVU.MOREX.r3.4HG0338270	ATGACGCCTCGGCCCCACCGACACTCGGCGACGTCGCCGCCTGTTGCCGCCGCGGCCGAGATGGTGGTCGCCAGGGCGAATGGGGCGAAGAGGGAAGCAGCCGCCGCCGCCGCCGCCGCCAACACCACCGCTGCCGCCGACGCCGACCCAGATTCTCCTATCTCCGTTCTGGGGGAAGAGAAAATGTCCGGATCCAAGGATGGGAAAGCTGGCGAGCTCAAGGCCAACGGTGGCGAGGCGCATCCCATCGACGGGGCGCTGAAGGCTGAAGAACTGCTGCTCAACTCTGTCAAAGAGGAGACATCGTTTGAGCTCGTGGCCAAGAACGGCGATACCTCTTTAATCACAGAGGTGATGACCAAGGAGGAAGAGGAGATGTATCAGGCCCGGATTAAGTTA…	chr4:22165167-22171178	Horvu_AKASHIN_4H01G050800	ATGACGCCTCGGCCCCACCGACACTCGGCGACGTCGCCGCCTGTTGCCGCCGCGGCCGAGATGGTGGTCGCCAGGGCGAATGGGGCGAAGAGGGAAGCAGCAGCCGCGGCCGCCGCCGCCAACACCACCGCTGCCGCCGACGCCGACCCAGATTCTCCTATCTCCGTTCTGGGGGAAGAGAAAATGTCCGGATCCAAGGATGGGAAAGCTGGCGAGCTCAAGGCCAACGGTGGCGAGGCGCATCCCATCGACGGGGCGCTGAAGGCTGAAGAACTGCTGCTCAACTCTGTCAAAGACGAGACATCGTTTGAGCTCGTGGCCAAGAACGGCGATACGTCTTTAATCACAGAGGTGATGACCAAGGAGGAAGAGGAGATGTATCAGGCCCGGATTAAGTTA…	chr4H:23844334-23850348	Horvu_BARKE_4H01G054600	ATGACGCCTCGGCCCCACCGACACTCGGCGACGTCGCCGCCTGTTGCCGCCGCGGCCGAGATGGTGGTCGCCAGGGCGAATGGGGCGAAGAGGGAAGCAGCCGCCGCCGCCGCCGCCGCCAACACCACCGCTGCCGCCGACGCCGACCCAGATTCTCCTATCTCCGTTCTGGGGGAAGAGAAAATGTCCGGATCCAAGGATGGGAAAGCTGGCGAGCTCAAGGCCAACGGTGGCGAGGCGCATCCCATCGACGGGGCGCTGAAGGCTGAAGAACTGCTGCTCAACTCTGTCAAAGAGGAGACATCGTTTGAGCTCGTGGCCAAGAACGGCGATACCTCTTTAATCACAGAGGTGATGACCAAGGAGGAAGAGGAGATGTATCAGGCCCGGATTAAGTTA…	chr4H:21871883-21877894	Horvu_GOLDEN_4H01G044400	ATGACGCCTCGGCCCCACCGACACTCGGCGACGTCGCCGCCTGTTGCCGCCGCGGCCGAGATGGTGGTCGCCAGGGCGAATGGGGCGAAGAGGGAAGCAGCCGCCGCCGCCGCCGCCGCCAACACCACCGCTGCCGCCGACGCCGACCCAGATTCTCCTATCTCCGTTCTGGGGGAAGAGAAAATGTCCGGATCCAAGGATGGGAAAGCTGGCGAGCTCAAGGCCAACGGTGGCGAGGCGCATCCCATCGACGGGGCGCTGAAGGCTGAAGAACTGCTGCTCAACTCTGTCAAAGAGGAGACATCGTTTGAGCTCGTGGCCAAGAACGGCGATACCTCTTTAATCACAGAGGTGATGACCAAGGAGGAAGAGGAGATGTATCAGGCCCGGATTAAGTTA…	chr4H:17297895-17303906	Horvu_HOCKETT_4H01G044000	ATGACGCCTCGGCCCCACCGACACTCGGCGACGTCGCCGCCTGTTGCCGCCGCGGCCGAGATGGTGGTCGCCAGGGCGAATGGGGCGAAGAGGGAAGCAGCCGCCGCCGCCGCCGCCGCCAACACCACCGCTGCCGCCGACGCCGACCCAGATTCTCCTATCTCCGTTCTGGGGGAAGAGAAAATGTCCGGATCCAAGGATGGGAAAGCTGGCGAGCTCAAGGCCAACGGTGGCGAGGCGCATCCCATCGACGGGGCGCTGAAGGCTGAAGAACTGCTGCTCAACTCTGTCAAAGAGGAGACATCGTTTGAGCTCGTGGCCAAGAACGGCGATACCTCTTTAATCACAGAGGTGATGACCAAGGAGGAAGAGGAGATGTATCAGGCCCGGATTAAGTTA…	chr4H:17768466-17774477	Horvu_10350_4H01G053900	ATGACGCCTCGGCCCCACCGACACTCGGCGACGTCGCCGCCTGTTGCCGCCGCGGCCGAGATGGTGGTCGCCAGGGCGAATGGGGCGAAGAGGGAAGCAGCCGCCGCCGCCGCCGCCGCCAACACCACCGCTGCCGCCGACGCCGACCCAGATTCTCCTATCTCCGTTCTGGGGGAAGAGAAAATGTCCGGATCCAAGGATGGGAAAGCTGGCGAGCTCAAGGCCAACGGTGGCGAGGCGCATCCCATCGACGGGGCGCTGAAGGCTGAAGAACTGCTGCTCAACTCTGTCAAAGAGGAGACATCGTTTGAGCTCGTGGCCAAGAACGGCGATACCTCTTTAATCACAGAGGTGATGACCAAGGAGGAAGAGGAGATGTATCAGGCCCGGATTAAGTTA…	chr4H:23179157-23185170	Horvu_13821_4H01G052000	ATGACGCCTCGGCCCCACCGACACTCGGCGACGTCGCCGCCTGTTGCCGCCGCGGCCGAGATGGTGGTCGCCAGGGCGAATGGGGCGAAGAGGGAAGCAGCCGCCGCCGCCGCCGCCGCCAACACCACCGCTGCCGCCGACGCCGACCCAGATTCTCCTATCTCCGTTCTGGGGGAAGAGAAAATGTCCGGATCCAAGGATGGGAAAGCTGGCGAGCTCAAGGCCAACGGTGGCGAGGCGCATCCCATCGACGGGGCGCTGAAGGCTGAAGAACTGCTGCTCAACTCTGTCAAAGAGGAGACATCGTTTGAGCTCGTGGCCAAGAACGGCGATACCTCTTTAATCACAGAGGTGATGACCAAGGAGGAAGAGGAGATGTATCAGGCCCGGATTAAGTTA…	chr4H:23368270-23374281	Horvu_13942_4H01G055700	ATGACGCCTCGGCCCCACCGACACTCGGCGACGTCGCCGCCTGTTGCCGCCGCGGCCGAGATGGTGGTCGCCAGGGCGAATGGGGCGAAGAGGGAAGCAGCAGCCGCGGCCGCCGCCGCCAACACCACCGCTGCCGCCGACGCCGACCCAGATTCTCCTATCTCCGTTCTGGGGGAAGAGAAAATGTCCGGATCCAAGGATGGGAAAGCTGGCGAGCTCAAGGCCAACGGTGGCGAGGCGCATCCCATCGACGGGGCGCTGAAGGCTGAAGAACTGCTGCTCAACTCTGTCAAAGACGAGACATCGTTTGAGCTCGTGGCCAAGAACGGCGATACGTCTTTAATCACAGAGGTGATGACCAAGGAGGAAGAGGAGATGTATCAGGCCCGGATTAAGTTA…	chr4H:22852628-22858642	Horvu_21599_4H01G053000	ATGACGCCTCGGCCCCACCGACACTCGGCGACGTCGCCGCCTGTTGCCGCCGCGGCCGAGATGGTGGTCGCCAGGGCGAATGGGGCGAAGAGGGAAGCAGCAGCCGCGGCCGCCGCCGCCAACACCACCGCTGCCGCCGACGCCGACCCAGATTCTCCTATCTCCGTTCTGGGGGAAGAGAAAATGTCCGGATCCAAGGATGGGAAAGCTGGCGAGCTCAAGGCCAACGGTGGCGAGGCGCATCCCATCGACGGGGCGCTGAAGGCTGAAGAACTGCTGCTCAACTCTGTCAAAGACGAGACATCGTTTGAGCTCGTGGCCAAGAACGGCGATACGTCTTTAATCACAGAGGTGATGACCAAGGAGGAAGAGGAGATGTATCAGGCCCGGATTAAGTTA…	chr4H:24401590-24407604	Horvu_3081_4H01G050700	ATGACGCCTCGGCCCCACCGACACTCGGCGACGTCGCCGCCTGTTGCCGCCGCGGCCGAGATGGTGGTCGCCAGGGCGAATGGGGCGAAGAGGGAAGCAGCCGCCGCCGCCGCCGCCGCCAACACCACCGCTGCCGCCGACGCCGACCCAGATTCTCCTATCTCCGTTCTGGGGGAAGAGAAAATGTCCGGATCCAAGGATGGGAAAGCTGGCGAGCTCAAGGCCAACGGTGGCGAGGCGCATCCCATCGACGGGGCGCTGAAGGCTGAAGAACTGCTGCTCAACTCTGTCAAAGAGGAGACATCGTTTGAGCTCGTGGCCAAGAACGGCGATACCTCTTTAATCACAGAGGTGATGACCAAGGAGGAAGAGGAGATGTATCAGGCCCGGATTAAGTTA…	chr4H:22840108-22846119	Horvu_HHOR_4H01G053300	ATGACGCCTCGGCCCCACCGACACTCGGCGACGTCGCCGCCTGTTGCCGCCGCGGCCGAGATGGTGGTCGCCAGGGCGAATGGGGCGAAGAGGGAAGCAGCCGCCGCCGCCGCCGCCGCCAACACCACCGCTGCCGCCGACGCCGACCCAGATTCTCCTATCTCCGTTCTGGGGGAAGAGAAAATGTCCGGATCCAAGGATGGGAAAGCTGGCGAGCTCAAGGCCAACGGTGGCGAGGCGCATCCCATCGACGGGGCGCTGAAGGCTGAAGAACTGCTGCTCAACTCTGTCAAAGAGGAGACATCGTTTGAGCTCGTGGCCAAGAACGGCGATACCTCTTTAATCACAGAGGTGATGACCAAGGAGGAAGAGGAGATGTATCAGGCCCGGATTAAGTTA…	chr4H:25259477-25265488	Horvu_7552_4H01G051400	ATGACGCCTCGGCCCCACCGACACTCGGCGACGTCGCCGCCTGTTGCCGCCGCGGCCGAGATGGTGGTCGCCAGGGCGAATGGGGCGAAGAGGGAAGCAGCCGCCGCCGCCGCCGCCGCCAACACCACCGCTGCCGCCGACGCCGACCCAGATTCTCCTATCTCCGTTCTGGGGGAAGAGAAAATGTCCGGATCCAAGGATGGGAAAGCTGGCGAGCTCAAGGCCAACGGTGGCGAGGCGCATCCCATCGACGGGGCGCTGAAGGCTGAAGAACTGCTGCTCAACTCTGTCAAAGAGGAGACATCGTTTGAGCTCGTGGCCAAGAACGGCGATACCTCTTTAATCACAGAGGTGATGACCAAGGAGGAAGAGGAGATGTATCAGGCCCGGATTAAGTTA…	chr4H:23259966-23265977	Horvu_8148_4H01G052500	ATGACGCCTCGGCCCCACCGACACTCGGCGACGTCGCCGCCTGTTGCCGCCGCGGCCGAGATGGTGGTCGCCAGGGCGAATGGGGCGAAGAGGGAAGCAGCCGCCGCCGCCGCCGCCGCCAACACCACCGCTGCCGCCGACGCCGACCCAGATTCTCCTATCTCCGTTCTGGGGGAAGAGAAAATGTCCGGATCCAAGGATGGGAAAGCTGGCGAGCTCAAGGCCAACGGTGGCGAGGCGCATCCCATCGACGGGGCGCTGAAGGCTGAAGAACTGCTGCTCAACTCTGTCAAAGAGGAGACATCGTTTGAGCTCGTGGCCAAGAACGGCGATACCTCTTTAATCACAGAGGTGATGACCAAGGAGGAAGAGGAGATGTATCAGGCCCGGATTAAGTTA…	chr4H:23617010-23623021	Horvu_9043_4H01G049400	ATGACGCCTCGGCCCCACCGACACTCGGCGACGTCGCCGCCTGTTGCCGCCGCGGCCGAGATGGTGGTCGCCAGGGCGAATGGGGCGAAGAGGGAAGCAGCCGCCGCCGCCGCCGCCGCCAACACCACCGCTGCCGCCGACGCCGACCCAGATTCTCCTATCTCCGTTCTGGGGGAAGAGAAAATGTCCGGATCCAAGGATGGGAAAGCTGGCGAGCTCAAGGCCAACGGTGGCGAGGCGCATCCCATCGACGGGGCGCTGAAGGCTGAAGAACTGCTGCTCAACTCTGTCAAAGAGGAGACATCGTTTGAGCTCGTGGCCAAGAACGGCGATACCTCTTTAATCACAGAGGTGATGACCAAGGAGGAAGAGGAGATGTATCAGGCCCGGATTAAGTTA…	chr4H:23011770-23017765	Horvu_IGRI_4H01G052000	ATGACGCCTCGGCCCCACCGACACTCGGCGACGTCGCCGCCTGTTGCCGCCGCGGCCGAGATGGTGGTCGCCAGGGCGAATGGGGCGAAGAGGGAAGCAGCCGCCGCCGCCGCCGCCGCCAACACCACCGCTGCCGCCGACGCCGACCCAGATTCTCCTATCTCCGTTCTGGGGGAAGAGAAAATGTCCGGATCCAAGGATGGGAAAGCTGGCGAGCTCAAGGCCAACGGTGGCGAGGCGCATCCCATCGACGGGGCGCTGAAGGCTGAAGAACTGCTGCTCAACTCTGTCAAAGAGGAGACATCGTTTGAGCTCGTGGCCAAGAACGGCGATACCTCTTTAATCACAGAGGTGATGACCAAGGAGGAAGAGGAGATGTATCAGGCCCGGATTAAGTTA…	chr4H:22825826-22831837	Horvu_OUN333_4H01G053500	ATGACGCCTCGGCCCCACCGACACTCGGCGACGTCGCCGCCTGTTGCCGCCGCGGCCGAGATGGTGGTCGCCAGGGCGAATGGGGCGAAGAGGGAAGCAGCCGCCGCCGCCGCCGCCGCCAACACCACCGCTGCCGCCGACGCCGACCCAGATTCTCCTATCTCCGTTCTGGGGGAAGAGAAAATGTCCGGATCCAAGGATGGGAAAGCTGGCGAGCTCAAGGCCAACGGTGGCGAGGCGCATCCCATCGACGGGGCGCTGAAGGCTGAAGAACTGCTGCTCAACTCTGTCAAAGAGGAGACATCGTTTGAGCTCGTGGCCAAGAACGGCGATACCTCTTTAATCACAGAGGTGATGACCAAGGAGGAAGAGGAGATGTATCAGGCCCGGATTAAGTTA…	chr4H:24366389-24372400
	Lsh_3	HORVU.MOREX.r3.7HG0646770	ATGGTGGTCGCCGTGGCGAATGCCGCCCCCACCGCCGTCACGGCCGCCGACGGCGACGCCGATTCTCCTGTATCCGTTCTGGAGGACGAGAAAATGCCCGACGCCAAGGACGAGAGAAACGCCGGCGATTCGAAGCTCGAGGCCGCTGCAGATCAGTCACTGAACTCCGTCAGAGAGGAGGCGGCCGATGTGTTTCAGGAGGCCGATGACGGCGACGCTGGCCTCGTCACGGAGGTGATGGCCAAGGAGGAAGAGGAGCTGTACCGGGCCCGGCTCAAGGCAGAGGAAGAGGAGGAGGCCAGGAGGAGGGAAGCTCGCAAGACTTTTGATCCGAATCAACGGTTCAGCAAGTTGGATGAGCTGCTGACAAAGACACAGCTCTATTCTGAATTCCTGCTT…	chr7:22383744-22389436	Horvu_AKASHIN_7H01G064600	ATGGTGGTCGCCGTGGCGAATGCCGCCCCCACCGCCGTCACGGCCGCCGACGGCGACGCCGATTCTCCTGTATCCGTTCTGGAGGACGAGAAAATGCCCGACGCCAAGGACGAGAGAAACGCCGGCGATTCGAAGCTCGAGGCCGCTGCAGATCAGTCACTGAACTCCGTCAGAGAGGAGGCGGCCGATGTGTTTCAGGAGGCCGATGACGGCGACGCTGGCCTCGTCACGGAGGTGATGGCCAAGGAGGAAGAGGAGCTGTACCGGGCCCGGCTCAAGGCAGAGGAAGAGGAGGAGGCCAGGAGGAGGGAAGCTCGCAAGACTTTTGATCCGAATCAACGGTTCAGCAAGTTGGATGAGCTGCTGACAAAGACACAGCTCTATTCTGAATTCCTGCTT…	chr7H:19553727-19565031	Horvu_BARKE_7H01G071700	ATGGTGGTCGCCGTGGCGAATGCCGCCCCCACCGCCGTCACGGCCGCCGACGGCGACGCCGATTCTCCTGTATCCGTTCTGGAGGACGAGAAAATGCCCGACGCCAAGGACGAGAGAAACGCCGGCGATTCGAAGCTCGAGGCCGCTGCAGATCAGTCACTGAACTCCGTCAGAGAGGAGGCGGCCGATGTGTTTCAGGAGGCCGATGACGGCGACGCTGGCCTCGTCACGGAGGTGATGGCCAAGGAGGAAGAGGAGCTGTACCGGGCCCGGCTCAAGGCAGAGGAAGAGGAGGAGGCCAGGAGGAGGGAAGCTCGCAAGACTTTTGATCCGAATCAACGGTTCAGCAAGTTGGATGAGCTGCTGACAAAGACACAGCTCTATTCTGAATTCCTGCTT…	chr7H:19173409-19179101	Horvu_GOLDEN_7H01G059700	ATGGTGGTCGCCGTGGCGAATGCCGCCCCCACCGCCGTCACGGCCGCCGACGGCGACGCCGATTCTCCTGTATCCGTTCTGGAGGACGAGAAAATGCCCGACGCCAAGGACGAGAGAAACGCCGGCGATTCGAAGCTCGAGGCCGCTGCAGATCAGTCACTGAACTCCGTCAGAGAGGAGGCGGCCGATGTGTTTCAGGAGGCCGATGACGGCGACGCTGGCCTCGTCACGGAGGTGATGGCCAAGGAGGAAGAGGAGCTGTACCGGGCCCGGCTCAAGGCAGAGGAAGAGGAGGAGGCCAGGAGGAGGGAAGCTCGCAAGACTTTTGATCCGAATCAACGGTTCAGCAAGTTGGATGAGCTGCTGACAAAGACACAGCTCTATTCTGAATTCCTGCTT…	chr7H:15720540-15726232	N/A	N/A	chr7H:221089-474205	Horvu_10350_7H01G071000	ATGGTGGTCGCCGTGGCGAATGCCGCCCCCACCGCCGTCACGGCCGCCGACGGCGACGCCGATTCTCCTGTATCCGTTCTGGAGGACGAGAAAATGCCCGACGCCAAGGACGAGAGAAACGCCGGCGATTCGAAGCTCGAGGCCGCTGCAGATCAGTCACTGAACTCCGTCAGAGAGGAGGCGGCCGATGTGTTTCAGGAGGCCGATGACGGCGACGCTGGCCTCGTCACGGAGGTGATGGCCAAGGAGGAAGAGGAGCTGTACCGGGCCCGGCTCAAGGCAGAGGAAGAGGAGGAGGCCAGGAGGAGGGAAGCTCGCAAGACTTTTGATCCGAATCAACGGTTCAGCAAGTTGGATGAGCTGCTGACAAAGACACAGCTCTATTCTGAATTCCTGCTT…	chr7H:19735116-19740808	Horvu_13821_7H01G066900	ATGGTGGTCGCCGTGGCGAATGCCGCCCCCACCGCCGTCACGGCCGCCGACGGCGACGCCGATTCTCCTGTATCCGTTCTGGAGGACGAGAAAATGCCCGACGCCAAGGACGAGAGAAACGCCGGCGATTCGAAGCTCGAGGCCGCTGCAGATCAGTCACTGAACTCCGTCAGAGAGGAGGCGGCCGATGTGTTTCAGGAGGCCGATGACGGCGACGCTGGCCTCGTCACGGAGGTGATGGCCAAGGAGGAAGAGGAGCTGTACCGGGCCCGGCTCAAGGCAGAGGAAGAGGAGGAGGCCAGGAGGAGGGAAGCTCGCAAGACTTTTGATCCGAATCAACGGTTCAGCAAGTTGGATGAGCTGCTGACAAAGACACAGCTCTATTCTGAATTCCTGCTT…	chr7H:20246904-20252880	Horvu_13942_7H01G065200	ATGGTGGTCGCCGTGGCGAATGCCGCCCCCACCGCCGTCACGGCCGCCGACGGCGACGCCGATTCTCCTGTATCCGTTCTGGAGGACGAGAAAATGCCCGACGCCAAGGACGAGAGAAACGCCGGCGATTCGAAGCTCGAGGCCGCTGCAGATCAGTCACTGAACTCCGTCAGAGAGGAGGCGGCCGATGTGTTTCAGGAGGCCGATGACGGCGACGCTGGCCTCGTCACGGAGGTGATGGCCAAGGAGGAAGAGGAGCTGTACCGGGCCCGGCTCAAGGCAGAGGAAGAGGAGGAGGCCAGGAGGAGGGAAGCTCGCAAGACTTTTGATCCGAATCAACGGTTCAGCAAGTTGGATGAGCTGCTGACAAAGACACAGCTCTATTCTGAATTCCTGCTT…	chr7H:19153407-19159099	Horvu_21599_7H01G070800	ATGGTGGTCGCCGTGGCGAATGCCGCCCCCACCGCCGTCACGGCCGCCGACGGCGACGCCGATTCTCCTGTATCCGTTCTGGAGGACGAGAAAATGCCCGACGCCAAGGACGAGAGAAACGCCGGCGATTCGAAGCTCGAGGCCGCTGCAGATCAGTCACTGAACTCCGTCAGAGAGGAGGCGGCCGATGTGTTTCAGGAGGCCGATGACGGCGACGCTGGCCTCGTCACGGAGGTGATGGCCAAGGAGGAAGAGGAGCTGTACCGGGCCCGGCTCAAGGCAGAGGAAGAGGAGGAGGCCAGGAGGAGGGAAGCTCGCAAGACTTTTGATCCGAATCAACGGTTCAGCAAGTTGGATGAGCTGCTGACAAAGACACAGCTCTATTCTGAATTCCTGCTT…	chr7H:21067838-21078344	Horvu_3081_7H01G072300	ATGGTGGTCGCCGTGGCGAATGCCGCCCCCACCGCCGTCACGGCCGCCGACGGCGACGCCGATTCTCCTGTATCCGTTCTGGAGGACGAGAAAATGCCCGACGCCAAGGACGAGAGAAACGCCGGCGATTCGAAGCTCGAGGCCGCTGCAGATCAGTCACTGAACTCCGTCAGAGAGGAGGCGGCCGATGTGTTTCAGGAGGCCGATGACGGCGACGCTGGCCTCGTCACGGAGGTGATGGCCAAGGAGGAAGAGGAGCTGTACCGGGCCCGGCTCAAGGCAGAGGAAGAGGAGGAGGCCAGGAGGAGGGAAGCTCGCAAGACTTTTGATCCGAATCAACGGTTCAGCAAGTTGGATGAGCTGCTGACAAAGACACAGCTCTATTCTGAATTCCTGCTT…	chr7H:19702167-19709404	Horvu_HHOR_Un01G006400	ATGGTGGTCGCCGTGGCGAATGCCGCCCCCACCGCCGTCACGGCCGCCGACGGCGACGCCGATTCTCCTGTATCCGTTCTGGAGGACGAGAAAATGCCCGACGCCAAGGACGAGAGAAACGCCGGCGATTCGAAGCTCGAGGCCGCTGCAGATCAGTCACTGAACTCCGTCAGAGAGGAGGCGGCCGATGTGTTTCAGGAGGCCGATGACGGCGACGCTGGCCTCGTCACGGAGGTGATGGCCAAGGAGGAAGAGGAGCTGTACCGGGCCCGGCTCAAGGCAGAGGAAGAGGAGGAGGCCAGGAGGAGGGAAGCTCGCAAGACTTTTGATCCGAATCAACGGTTCAGCAAGTTGGATGAGCTGCTGACAAAGACACAGCTCTATTCTGAATTCCTGCTT…	chrUn:2806446-2811976	Horvu_7552_7H01G069100	ATGGTGGTCGCCGTGGCGAATGCCGCCCCCACCGCCGTCACGGCCGCCAACGGCGACGCCGATTCTCCTGTATCCGTTCTGGAGGACGAGAAAATGCCCGACGCCAAGGACGAGAGAAACGCCGGCGATTCGAAGCTCGAGGCCGCTGCAGATCAGTCACTGAACTCCGTCAGAGAGGAGGCGGCCGATGTGTTTCAGGAGGCCGATGACGGCGACGCCGGCCTCGTCACGGAGGTGATGGCCAAGGAGGAAGAGGAGCTGTACCGGGCCCGGATCAAGGCAGAGGAAGAGGAGGAGGCCAGGAGGAGGGAAGCTCGCAAGGCTTTTGATCCGAATCAACGGTTCAGCAAGTTGGATGAGCTGCTGACAAAGACACAGCTCTATTCTGAATTCCTGCTT…	chr7H:20139835-20145539	Horvu_8148_7H01G066700	ATGGTGGTCGCCGTGGCGAATGCCGCCCCCACCGCCGTCACGGCCGCCGACGGCGACGCCGATTCTCCTGTATCCGTTCTGGAGGACGAGAAAATGCCCGACGCCAAGGACGAGAGAAACGCCGGCGATTCGAAGCTCGAGGCCGCTGCAGATCAGTCACTGAACTCCGTCAGAGAGGAGGCGGCCGATGTGTTTCAGGAGGCCGATGACGGCGACGCTGGCCTCGTCACGGAGGTGATGGCCAAGGAGGAAGAGGAGCTGTACCGGGCCCGGCTCAAGGCAGAGGAAGAGGAGGAGGCCAGGAGGAGGGAAGCTCGCAAGACTTTTGATCCGAATCAACGGTTCAGCAAGTTGGATGAGCTGCTGACAAAGACACAGCTCTATTCTGAATTCCTGCTT…	chr7H:19125359-19135774	N/A	N/A	chr7H:20042328-20018458	Horvu_IGRI_7H01G066900	ATGGTGGTCGCCGTGGCGAATGCCGCCCCCACCGCCGTCACGGCCGCCGACGGCGACGCCGATTCTCCTGTATCCGTTCTGGAGGACGAGAAAATGCCCGACGCCAAGGACGAGAGAAACGCCGGCGATTCGAAGCTCGAGGCCGCTGCAGATCAGTCACTGAACTCCGTCAGAGAGGAGGCGGCCGATGTGTTTCAGGAGGCCGATGACGGCGACGCTGGCCTCGTCACGGAGGTGATGGCCAAGGAGGAAGAGGAGCTGTACCGGGCCCGGCTCAAGGCAGAGGAAGAGGAGGAGGCCAGGAGGAGGGAAGCTCGCAAGACTTTTGATCCGAATCAACGGTTCAGCAAGTTGGATGAGCTGCTGACAAAGACACAGCTCTATTCTGAATTCCTGCTT…	chr7H:19166214-19174043	Horvu_OUN333_7H01G071700	ATGGTGGTCGCCGTGGCGAATGCCGCCCCCACCGCCGTCACGGCCGCCAACGGCGACGCCGATTCTCCTGTATCCGTTCTGGAGGACGAGAAAATGCCCGACGCCAAGGACGAGAGAAACGCCGGCGATTCGAAGCTCGAGGCCGCTGCAGATCAGTCACTGAACTCCGTCAGAGAGGAGGCGGCCGATGTGTTTCAGGAGGCCGATGACGGCGACGCCGGCCTCGTCACGGAGGTGATGGCCAAGGAGGAAGAGGAGCTGTACCGGGCCCGGATCAAGGCAGAGGAAGAGGAGGAGGCCAGGAGGAGGGAAGCTCGCAAGGCTTTTGATCCGAATCAACGGTTCAGCAAGTTGGATGAGCTGCTGACAAAGACACAGCTCTATTCTGAATTCCTGCTT…	chr7H:22463015-22469053
	Iswi_1	HORVU.MOREX.r3.1HG0022440	ATGGGGAATCCGGCGGACTACGAGGACGAGGAGGACGAGGAGCTGTCCAGCTCCGGCGACGCGGAGGGCGAGGAGCAGCAGCAGCAGCAGGAGGAGGGATCGGATGAAGGCGAGGAGGAGGAGGATGATGAGGAGGAAGAGCAGGAGCCCGAAGGGGAGCAGGCGGCGGGGGATGGCGGGGAGGAGGAGGAAGAGGTGGACGAGGAGGAGATCGTCGCCGCCACCACCGGCGCCGGCGCCGATGACTACGACGACGACGGGGGAGACGGCGCTGGCGGGGCGGAGGAGGCCGAATCCACCGAGGACGACGCCGCCGCGGAGGAGGGCGGCGAGGAAGATGCCGACGAGTCTGAAGACGCCACTGGAAAGACAGAGATTGGCAAGCGGGAACGAGCCAAG…	chr1:83456192-83466831	Horvu_AKASHIN_1H01G131200	ATGGGGAATCCGGCGGACTACGAGGACGAGGAGGACGAGGAGCTGTCCAGCTCCGGCGACGCGGAGGGCGAGGAGCAGCAGCAGCAGCAGGAGGAGGGATCGGATGAAGGCGAGGAGGAGGAGGATGATGAGGAGGAAGAGCAGGAGCCCGCAGGGGAGCAGGCGGCGGGGGATGGTGGGGAGGAGGAGGAAGAGGTGGACGAGGAGGAGATCGTCGCCGCCACCACCGGCGCCGGCGCCGATGACTACGACGACGACGGGGGAGACGGCGCTGGCGGGGCGGAGGAGGCCGAATCCACCGAGGACGACGCCGCCGCGGAGGAGGGCGGCGAGGAAGATGCCGACGAGTCTGAAGACGCCACTGGAAAGACAGAGATTGGCAAGCGGGAACGAGCCAAG…	chr1H:85886922-85897084	Horvu_BARKE_1H01G141400	ATGGGGAATCCGGCGGACTACGAGGACGAGGAGGACGAGGAGCTGTCCAGCTCCGGCGACGCGGAGGGCGAGGAGCAGCAGCAGCAGCAGGAGGAGGGATCGGATGAAGGCGAGGAGGAGGAGGATGATGAGGAGGAAGAGCAGGAGCCCGCAGGGGAGCAGGCGGCGGGGGATGGTGGGGAGGAGGAGGAAGAGGTGGACGAGGAGGAGATCGTCGCCGCCACCACCGGCGCCGGCGCCGATGACTACGACGACGACGGGGGAGACGGCGCTGGCGGGGCGGAGGAGGCCGAATCCACCGAGGACGACGCCGCCGCGGAGGAGGGCGGCGAGGAAGATGCCGACGAGTCTGAAGACGCCACTGGAAAGACAGAGATTGGCAAGCGGGAACGAGCCAAG…	chr1H:85125929-85136092	Horvu_GOLDEN_1H01G106200	ATGGGGAATCCGGCGGACTACGAGGACGAGGAGGACGAGGAGCTGTCCAGCTCCGGCGACGCGGAGGGCGAGGAGCAGCAGCAGCAGCAGGAGGAGGGATCGGATGAAGGCGAGGAGGAGGAGGATGATGAGGAGGAAGAGCAGGAGCCCGCAGGGGAGCAGGCGGCGGGGGATGGTGGGGAGGAGGAGGAAGAGGTGGACGAGGAGGAGATCGTCGCCGCCACCACCGGCGCCGGCGCCGATGACTACGACGACGACGGGGGAGACGGCGCTGGCGGGGCGGAGGAGGCCGAATCCACCGAGGACGACGCCGCCGCGGAGGAGGGCGGCGAGGAAGATGCCGACGAGTCTGAAGACGCCACTGGAAAGACAGAGATTGGCAAGCGGGAACGAGCCAAG…	chr1H:68137209-68147372	Horvu_HOCKETT_1H01G126800	ATGGGGAATCCGGCGGACTACGAGGACGAGGAGGACGAGGAGCTGTCCAGCTCCGGCGACGCGGAGGGCGAGGAGCAGCAGCAGCAGCAGGAGGAGGGATCGGATGAAGGCGAGGAGGAGGAGGATGATGAGGAGGAAGAGCAGGAGCCCGCAGGGGAGCAGGCGGCGGGGGATGGTGGGGAGGAGGAGGAAGAGGTGGACGAGGAGGAGATCGTCGCCGCCACCACCGGCGCCGGCGCCGATGACTACGACGACGACGGGGGAGACGGCGCTGGCGGGGCGGAGGAGGCCGAATCCACCGAGGACGACGCCGCCGCGGAGGAGGGCGGCGAGGAAGATGCCGACGAGTCTGAAGACGCCACTGGAAAGACAGAGATTGGCAAGCGGGAACGAGCCAAG…	chr1H:74773560-74783723	Horvu_10350_1H01G136800	ATGGGGAATCCGGCGGACTACGAGGACGAGGAGGACGAGGAGCTGTCCAGCTCCGGCGACGCGGAGGGCGAGGAGCAGCAGCAGCAGCAGGAGGAGGGATCGGATGAAGGCGAGGAGGAGGAGGATGATGAGGAGGAAGAGCAGGAGCCCGCAGGGGAGCAGGCGGCGGGGGATGGTGGGGAGGAGGAGGAAGAGGTGGACGAGGAGGAGATCGTCGCCGCCACCACCGGCGCCGGCGCCGATGACTACGACGACGACGGGGGAGACGGCGCTGGCGGGGCGGAGGAGGCCGAATCCACCGAGGACGACGCCGCCGCGGAGGAGGGCGGCGAGGAAGATGCCGACGAGTCTGAAGACGCCACTGGAAAGACAGAGATTGGCAAGCGGGAACGAGCCAAG…	chr1H:81991576-82001739	Horvu_13821_1H01G131100	ATGGGGAATCCGGCGGACTACGAGGACGAGGAGGACGAGGAGCTGTCCAGCTCCGGCGACGCGGAGGGCGAGGAGCAGCAGCAGCAGCAGGAGGAGGGATCGGATGAAGGCGAGGAGGAGGAGGATGATGAGGAGGAAGAGCAGGAGCCCGCAGGGGAGCAGGCGGCGGGGGATGGTGGGGAGGAGGAGGAAGAGGTGGACGAGGAGGAGATCGTCGCCGCCACCACCGGCGCCGGCGCCGATGACTACGACGACGACGGGGGAGACGGCGCTGGCGGGGCGGAGGAGGCCGAATCCACCGAGGACGACGCCGCCGCGGAGGAGGGCGGCGAGGAAGATGCCGACGAGTCTGAAGACGCCACTGGAAAGACAGAGATTGGCAAGCGGGAACGAGCCAAG…	chr1H:85901811-85911974	Horvu_13942_1H01G129300	ATGGGGAATCCGGCGGACTACGAGGACGAGGAGGACGAGGAGCTGTCCAGCTCCGGCGACGCGGAGGGCGAGGAGCAGCAGCAGCAGCAGGAGGAGGGATCGGATGAAGGCGAGGAGGAGGAGGATGATGAGGAGGAAGAGCAGGAGCCCGAAGGGGAGCAGGCGGCGGGGGATGGCGGGGAGGAGGAGGAAGAGGTGGACGAGGAGGAGATCGTCGCCGCCACCACCGGCGCCGGCGCCGATGACTACGACGACGACGGGGGAGACGGCGCTGGCGGGGCGGAGGAGGCCGAATCCACCGAGGACGACGCCGCCGCGGAGGAGGGCGGCGAGGAAGATGCCGACGAGTCTGAAGACGCCACTGGAAAGACAGAGATTGGCAAGCGGGAACGAGCCAAG…	chr1H:81995146-82005353	Horvu_21599_1H01G129900	ATGGGGAATCCGGCGGACTACGAGGACGAGGAGGACGAGGAGCTGTCCAGCTCCGGCGACGCGGAGGGCGAGGAGCAGCAGCAGCAGCAGGAGGAGGGATCGGATGAAGGCGAGGAGGAGGAGGATGATGAGGAGGAAGAGCAGGAGCCCGCAGGGGAGCAGGCGGCGGGGGATGGTGGGGAGGAGGAGGAAGAGGTGGACGAGGAGGAGATCGTCGCCGCCACCACCGGCGCCGGCGCCGATGACTACGACGACGACGGGGGAGACGGCGCTGGCGGGGCGGAGGAGGCCGAATCCACCGAGGACGACGCCGCCGCGGAGGAGGGCGGCGAGGAAGATGCCGACGAGTCTGAAGACGCCACTGGAAAGACAGAGATTGGCAAGCGGGAACGAGCCAAG…	chr1H:84977550-84987713	Horvu_3081_1H01G130900	ATGGGGAATCCGGCGGACTACGAGGACGAGGAGGACGAGGAGCTGTCCAGCTCCGGCGACGCGGAGGGCGAGGAGCAGCAGCAGCAGCAGGAGGAGGGATCGGATGAAGGCGAGGAGGAGGAGGATGATGAGGAGGAAGAGCAGGAGCCCGAAGGGGAGCAGGCGGCGGGGGATGGTGGGGAGGAGGAGGAAGAGGTGGACGAGGAGGAGATCGTCGCCGCCACCACCGGCGCCGGCGCCGATGACTACGACGACGACGGGGGAGACGGCGCTGGCGGGGCGGAGGAGGCCGAATCCACCGAGGACGACGCCGCCGCGGAGGAGGGCGGCGAGGAAGATGCCGACGAGTCTGAAGACGCCACTGGAAAGACAGAGATTGGCAAGCGGGAACGAGCCAAG…	chr1H:82299403-82309566	Horvu_HHOR_1H01G135800	ATGGGGAATCCGGCGGACTACGAGGACGAGGAGGACGAGGAGCTGTCCAGCTCCGGCGACGCGGAGGGCGAGGAGCAGCAGCAGCAGCAGGAGGAGGGATCGGATGAAGGCGAGGAGGAGGAGGATGATGAGGAGGAAGAGCAGGAGCCCGAAGGGGAGCAGGCGGCGGGGGATGGTGGGGAGGAGGAGGAAGAGGTGGACGAGGAGGAGATCGTCGCCGCCACCACCGGCGCCGGCGCCGATGACTACGACGACGACGGGGGAGACGGCGCTGGCGGGGCGGAGGAGGCCGAATCCACCGAGGACGACGCCGCCGCGGAGGAGGGCGGCGAGGAAGATGCCGACGAGTCTGAAGACGCCACTGGAAAGACAGAGATTGGCAAGCGGGAACGAGCCAAG…	chr1H:90455243-90465494	Horvu_7552_1H01G134200	ATGGGGAATCCGGCGGACTACGAGGACGAGGAGGACGAGGAGCTGTCCAGCTCCGGCGACGCGGAGGGCGAGGAGCAGCAGCAGCAGCAGGAGGAGGGATCGGATGAAGGCGAGGAGGAGGAGGATGATGAGGAGGAAGAGCAGGAGCCCGAAGGGGAGCAGGCGGCGGGGGATGGCGGGGAGGAGGAGGAAGAGGTGGACGAGGAGGAGATCGTCGCCGCCACCACCGGCGCCGGCGCCGATGACTACGACGACGACGGGGGAGACGGCGCTGGCGGGGCGGAGGAGGCCGAATCCACCGAGGACGACGCCGCCGCGGAGGAGGGCGGCGAGGAAGATGCCGACGAGTCTGAAGACGCCACTGGAAAGACAGAGATTGGCAAGCGGGAACGAGCCAAG…	chr1H:83357288-83367495	Horvu_8148_1H01G130800	ATGGGGAATCCGGCGGACTACGAGGACGAGGAGGACGAGGAGCTGTCCAGCTCCGGCGACGCGGAGGGCGAGGAGCAGCAGCAGCAGCAGGAGGAGGGATCGGATGAAGGCGAGGAGGAGGAGGATGATGAGGAGGAAGAGCAGGAGCCCGCAGGGGAGCAGGCGGCGGGGGATGGTGGGGAGGAGGAGGAAGAGGTGGACGAGGAGGAGATCGTCGCCGCCACCACCGGCGCCGGCGCCGATGACTACGACGACGACGGGGGAGACGGCGCTGGCGGGGCGGAGGAGGCCGAATCCACCGAGGACGACGCCGCCGCGGAGGAGGGCGGCGAGGAAGATGCCGACGAGTCTGAAGACGCCACTGGAAAGACAGAGATTGGCAAGCGGGAACGAGCCAAG…	chr1H:83826984-83837147	Horvu_9043_1H01G132000	ATGGGGAATCCGGCGGACTACGAGGACGAGGAGGACGAGGAGCTGTCCAGCTCCGGCGACGCGGAGGGCGAGGAGCAGCAGCAGCAGCAGGAGGAGGGATCGGATGAAGGCGAGGAGGAGGAGGATGATGAGGAGGAAGAGCAGGAGCCCGCAGGGGAGCAGGCGGCGGGGGATGGTGGGGAGGAGGAGGAAGAGGTGGACGAGGAGGAGATCGTCGCCGCCACCACCGGCGCCGGCGCCGATGACTACGACGACGACGGGGGAGACGGCGCTGGCGGGGCGGAGGAGGCCGAATCCACCGAGGACGACGCCGCCGCGGAGGAGGGCGGCGAGGAAGATGCCGACGAGTCTGAAGACGCCACTGGAAAGACAGAGATTGGCAAGCGGGAACGAGCCAAG…	chr1H:80753036-80763199	Horvu_IGRI_1H01G131200	ATGGGGAATCCGGCGGACTACGAGGACGAGGAGGACGAGGAGCTGTCCAGCTCCGGCGACGCGGAGGGCGAGGAGCAGCAGCAGCAGCAGGAGGAGGGATCGGATGAAGGCGAGGAGGAGGAGGATGATGAGGAGGAAGAGCAGGAGCCCGAAGGGGAGCAGGCGGCGGGGGATGGTGGGGAGGAGGAGGAAGAGGTGGACGAGGAGGAGATCGTCGCCGCCACCACCGGCGCCGGCGCCGATGACTACGACGACGACGGGGGAGACGGCGCTGGCGGGGCGGAGGAGGCCGAATCCACCGAGGACGACGCCGCCGCGGAGGAGGGCGGCGAGGAAGATGCCGACGAGTCTGAAGACGCCACTGGAAAGACAGAGATTGGCAAGCGGGAACGAGCCAAG…	chr1H:82933405-82943568	Horvu_OUN333_1H01G132800	ATGGGGAATCCGGCGGACTACGAGGACGAGGAGGACGAGGAGCTGTCCAGCTCCGGCGACGCGGAGGGCGAGGAGCAGCAGCAGCAGCAGGAGGAGGGATCGGATGAAGGCGAGGAGGAGGAGGATGATGAGGAGGAAGAGCAGGAGCCCGCAGGGGAGCAGGCGGCGGGGGATGGTGGGGAGGAGGAGGAAGAGGTGGACGAGGAGGAGATCGTCGCCGCCACCACCGGCGCCGGCGCCGATGACTACGACGACGACGGGGGAGACGGCGCTGGCGGGGCGGAGGAGGCCGAATCCACCGAGGACGACGCCGCCGCGGAGGAGGGCGGCGAGGAAGATGCCGACGAGTCTGAAGACGCCACTGGAAAGACAGAGATTGGCAAGCGGGAACGAGCCAAG…	chr1H:86804108-86814271
	Iswi_2	HORVU.MOREX.r3.3HG0230070	ATGGCGAGGCCGTCGAGGCGCCGCGTGGTGGTGGTGGAGGAGGAGGAGGAGGAGTCCTCCGTCGAGGAGCAGCAGGGCCGGCCCGACGCCGGCGGGTCCGGATCCGGCGGGGAGGGGGGAGCGGGTCAGGCGGAGGAGGAGGAGATCGACGAGGAGGAGATCGAGGCCGTCACCACCGGCGCCGGCGCCGACGACGAGGGGGAGGAGGACGGGGAAGGGGACGAGGAGGAGCCGGAGCCCACCGACGACGACGAGGCCGAAGAGGACACCTCTGGAAACCCAGTGGTAGGGAAGCAGGAACGGGCCAGGCTCAGACAACTCCAGAAACTGAAGAAGCAGAAGATCAAAGAGATATTACAGACCCAGAATGCTGCCATCGATGCTGACATGAACAAGAAA…	chr3:22469644-22477796	Horvu_AKASHIN_3H01G073000	ATGGCGAGGCCGTCGAGGCGCCGCGTGGTGGTGGAGGAGGAGGAGTCCTCCGTCGAGGAGCAGCAGGGCCGGCCCGACGCCGGCGGGTCCGGATCCGGCGGGGAGGGGGGAGCGGGTCAGGCGGAGGAGGAGGAGATCGACGAGGAGGAGATCGAGGCCGTCACCACCGGCGCCGGCGCCGACGACGAGGGGGAGGAGGACGGGGAAGGGGACGAGGAGGAGCCGGAGCCCACCGACGACGACGAGGCCGAAGAGGACACCTCTGGAAACCCAGTGGTAGGGAAGCAGGAACGGGCCAGGCTCAGACAACTCCAGAAACTGAAGAAGCAGAAGATCAAAGAGATATTACAGACCCAGAATGCTGCCATCGATGCTGACATGAACAAGAAAGGGCAAGGG…	chr3H:24240400-24249171	Horvu_BARKE_3H01G077500	ATGGCGAGGCCGTCGAGGCGCCGCGTGGTGGTGGAGGAGGAGGAGTCCTCCGTCGAGGAGCAGCAGGGCCGGCCCGACGCCGGCGGGTCCGGATCCGGCGGGGAGGGGGGAGCGGGTCAGGCGGAGGAGGAGGAGATCGACGAGGAGGAGATCGAGGCCGTCACCACCGGCGCCGGCGCCGACGACGAGGGGGAGGAGGACGGGGAAGGGGACGAGGAGGAGCCGGAGCCCACCGACGACGACGAGGCCGAAGAGGACACCTCTGGAAACCCAGTGGTAGGGAAGCAGGAACGGGCCAGGCTCAGACAACTCCAGAAACTGAAGAAGCAGAAGATCAAAGAGATATTACAGACCCAGAATGCTGCCATCGATGCTGACATGAACAAGAAAGGGCAAGGG…	chr3H:22538774-22546589	Horvu_GOLDEN_3H01G064700	ATGGCGAGGCCGTCGAGGCGCCGCGTGGTGGTGGAGGAGGAGGAGTCCTCCGTCGAGGAGCAGCAGGGCCGGCCCGACGCCGGCGGGTCCGGATCCGGCGGGGAGGGGGGAGCGGGTCAGGCGGAGGAGGAGGAGATCGACGAGGAGGAGATCGAGGCCGTCACCACCGGCGCCGGCGCCGACGACGAGGGGGAGGAGGACGGGGAAGGGGACGAGGAGGAGCCGGAGCCCACCGACGACGACGAGGCCGAAGAGGACACCTCTGGAAACCCAGTGGTAGGGAAGCAGGAACGGGCCAGGCTCAGACAACTCCAGAAACTGAAGAAGCAGAAGATCAAAGAGATATTACAGACCCAGAATGCTGCCATCGATGCTGACATGAACAAGAAAGGGCAAGGG…	chr3H:17384834-17394218	Horvu_HOCKETT_3H01G067900	ATGGCGAGGCCGTCGAGGCGCCGCGTGGTGGTGGAGGAGGAGGAGTCCTCCGTCGAGGAGCAGCAGGGCCGGCCCGACGCCGGCGGGTCCGGATCCGGCGGGGAGGGGGGAGCGGGTCAGGCGGAGGAGGAGGAGATCGACGAGGAGGAGATCGAGGCCGTCACCACCGGCGCCGGCGCCGACGACGAGGGGGAGGAGGACGGGGAAGGGGACGAGGAGGAGCCGGAGCCCACCGACGACGACGAGGCCGAAGAGGACACCTCTGGAAACCCAGTGGTAGGGAAGCAGGAACGGGCCAGGCTCAGACAACTCCAGAAACTGAAGAAGCAGAAGATCAAAGAGATATTACAGACCCAGAATGCTGCCATCGATGCTGACATGAACAAGAAAGGGCAAGGG…	chr3H:18413377-18421697	Horvu_10350_3H01G073800	ATGCGAGATTACCAACTAGCTGGGCTTAATTGGCTCATACGGCTGTATGAAAACGGCATTAATGGAATATTGGCTGATGAGATGGGTCTTGGGAAAACTCTTCAAACTATTTCACTGATGGGTTATCTGCATGAATACAGAGGAATAACTGGTCCTCACATGGTTGTTGCACCAAAGTCTACTCTTGGTAACTGGATGAATGAAATTGCTCGTTTTTGTCCCATTTTGCGTGCTGTGAAATTCTTGGGAAATCCAGAAGAGAGGAATCATATAAGGGAGAACTTGCTACAGCCAGGAAAATTTGATGTGTGTGTGACCAGTTTTGAAATGGCAATCAAAGAAAAAAATGCATTGAAGCGTTTCAGCTGGCGCTACATTATTATTGATGAAGCTCATCGG…	chr3H:20932081-20937041	Horvu_13821_3H01G073800	ATGGCGAGGCCGTCGAGGCGCCGCGTGGTGGTGGAGGAGGAGGAGTCCTCCGTCGAGGAGCAGCAGGGCCGGCCCGACGCCGGCGGGTCCGGATCCGGCGGGGAGGGGGGAGCGGGTCAGGCGGAGGAGGAGGAGATCGACGAGGAGGAGATCGAGGCCGTCACCACCGGCGCCGGCGCCGACGACGAGGGGGAGGAGGACGGGGAAGGGGACGAGGAGGAGCCGGAGCCCACCGACGACGACGAGGCCGAAGAGGACACCTCTGGAAACCCAGTGGTAGGGAAGCAGGAACGGGCCAGGCTCAGACAACTCCAGAAACTGAAGAAGCAGAAGATCAAAGAGATATTACAGACCCAGAATGCTGCCATCGATGCTGACATGAACAAGAAAGGGCAAGGG…	chr3H:24487463-24496174	Horvu_13942_3H01G073800	ATGGCGAGGCCGTCGAGGCGCCGCGTGGTGGTGGAGGAGGAGGAGTCCTCCGTCGAGGAGCAGCAGGGCCGGCCCGACGCCGGCGGGTCCGGATCCGGCGGGGAGGGGGGAGCGGGTCAGGCGGAGGAGGAGGAGATCGACGAGGAGGAGATCGAGGCCGTCACCACCGGCGCCGGCGCCGACGACGAGGGGGAGGAGGACGGGGAAGGGGACGAGGAGGAGCCGGAGCCCACCGACGACGACGAGGCCGAAGAGGACACCTCTGGAAACCCAGTGGTAGGGAAGCAGGAACGGGCCAGGCTCAGACAACTCCAGAAACTGAAGAAGCAGAAGATCAAAGAGATATTACAGACCCAGAATGCTGCCATCGATGCTGACATGAACAAGAAAGGGCAAGGG…	chr3H:22060959-22069401	Horvu_21599_3H01G074300	ATGGCGAGGCCGTCGAGGCGCCGCGTGGTGGTGGTGGAGGAGGAGTCCTCCGGCGAGGAGCAGCAGGGCCGGCCCGACGCCGGCGGGTCCGGATCCGGCGGGGAGGGGGGAGCGGGTCAGGCGGAGGAGGAGGAGATCGACGAGGAGGAGATCGAGGCCGTCACCACCGGCGCCGGCGCCGACGACGAAGAGGAGGAGGAGGACGGGGAAGGGGACGAGGAGGAGCCGGAGCCCACCGACGACGACGAGGCCGAAGAGGACACCTCTGGAAACCCAGTGGTAGGGAAGCAGGAACGGGCCAGGCTCAGACAACTCCAGAAACTGAAGAAGCAGAAGATCAAAGAGATATTGCAGACCCAGAATGCTGCCATCGATGCTGACATGAACAAGAAAGGGCAA…	chr3H:23970494-23978901	Horvu_3081_3H01G069600	ATGGCGAGGCCGTCGAGGCGCCGCGTGGTGGTGGAGGAGGAGGAGTCCTCCGTCGAGGAGCAGCAGGGCCGGCCCGACGCCGGCGGGTCCGGATCCGGCGGGGAGGGGGGAGCGGGTCAGGCGGAGGAGGAGGAGATCGACGAGGAGGAGATCGAGGCCGTCACCACCGGCGCCGGCGCCGACGACGAGGGGGAGGAGGACGGGGAAGGGGACGAGGAGGAGCCGGAGCCCACCGACGACGACGAGGCCGAAGAGGACACCTCTGGAAACCCAGTGGTAGGGAAGCAGGAACGGGCCAGGCTCAGACAACTCCAGAAACTGAAGAAGCAGAAGATCAAAGAGATATTACAGACCCAGAATGCTGCCATCGATGCTGACATGAACAAGAAAGGGCAAGGG…	chr3H:21929630-21938738	Horvu_HHOR_3H01G073200	ATGGCGAGGCCGTCGAGGCGCCGCGTGGTGGTGGTGGAGGAGGAGTCCTCCGGCGAGGAGCAGCAGGGCCGGCCCGACGCCGGCGGGTCCGGATCCGGCGGGGAGGGGGGAGCGGGTCAGGCGGAGGAGGAGGAGATCGACGAGGAGGAGATCGAGGCCGTCACCACCGGCGCCGGCGCCGACGACGAAGAGGAGGAGGAGGACGGGGAAGGGGACGAGGAGGAGCCGGAGCCCACCGACGACGACGAGGCCGAAGAGGACACTGCTGGAAACCCAGTGGTAGGGAAGCAGGAACGGGCCAGGCTCAGACAACTCCAGAAACTGAAGAAGCAGAAGATCAAAGAGATATTACAGACCCAGAATGCTGCCATCGATGCTGACATGAACAAGAAAGGGCAA…	chr3H:23948601-23956381	Horvu_7552_3H01G075800	ATGGCGAGGCCGTCGAGGCGCCGCGTGGTGGTGGAGGAGGAGGAGTCCTCCGTCGAGGAGCAGCAGGGCCGGCCCGACGCCGGCGGGTCCGGATCCGGCGGGGAGGGGGGAGCGGGTCAGGCGGAGGAGGAGGAGATCGACGAGGAGGAGATCGAGGCCGTCACCACCGGCGCCGGCGCCGACGACGAGGGGGAGGAGGACGGGGAAGGGGACGAGGAGGAGCCGGAGCCCACCGACGACGACGAGGCCGAAGAGGACACCTCTGGAAACCCAGTGGTAGGGAAGCAGGAACGGGCCAGGCTCAGACAACTCCAGAAACTGAAGAAGCAGAAGATCAAAGAGATATTACAGACCCAGAATGCTGCCATCGATGCTGACATGAACAAGAAAGGGCAAGGG…	chr3H:21618434-21626587	Horvu_8148_3H01G076400	ATGGCGAGGCCGTCGAGGCGCCGCGTGGTGGTGGTGGAGGAGGAGTCCTCCGGCGAGGAGCAGCAGGGCCGGCCCGACGCCGGCGGGTCCGGATCCGGCGGGGAGGGGGGAGCGGGTCAGGCGGAGGAGGAGGAGATCGACGAGGAGGAGATCGAGGCCGTCACCACCGGCGCCGGCGCCGACGACGAAGAGGAGGAGGAGGACGGGGAAGGGGACGAGGAGGAGCCGGAGCCCACCGACGACGACGAGGCCGAAGAGGACACTGCTGGAAACCCAGTGGTAGGGAAGCAGGAACGGGCCAGGCTCAGACAACTCCAGAAACTGAAGAAGCAGAAGATCAAAGAGATATTACAGACCCAGAATGCTGCCATCGATGCTGACATGAACAAGAAAGGGCAA…	chr3H:22718878-22726940	Horvu_9043_3H01G069900	ATGCGAGATTACCAACTAGCTGGGCTTAATTGGCTCATACGGCTGTATGAAAACGGCATTAATGGAATATTGGCTGATGAGATGGGTCTTGGGAAAACTCTTCAAACTATTTCACTGATGGGTTATCTGCATGAATACAGAGGAATAACTGGTCCTCACATGGTTGTTGCACCAAAGTCTACTCTTGGTAACTGGATGAATGAAATTGCTCGTTTTTGTCCCATTTTGCGTGCTGTGAAATTCTTGGGAAATCCAGAAGAGAGGAATCATATAAGGGAGAACTTGCTACAGCCAGGAAAATTTGATGTGTGTGTGACCAGTTTTGAAATGGCAATCAAAGAAAAAAATGCATTGAAGCGTTTCAGCTGGCGCTACATTATTATTGATGAAGCTCATCGG…	chr3H:21839516-21844476	Horvu_IGRI_3H01G070700	ATGGCGAGGCCGTCGAGGCGCCGCGTGGTGGTGGTGGAGGAGGAGTCCTCCGGCGAGGAGCAGCAGGGCCGGCCCGACGCCGGCGGGTCCGGATCCGGCGGGGAGGGGGGAGCGGGTCAGGCGGAGGAGGAGGAGATCGACGAGGAGGAGATCGAGGCCGTCACCACCGGCGCCGGCGCCGACGACGAAGAGGAGGAGGAGGACGGGGAAGGGGACGAGGAGGAGCCGGAGCCCACCGACGACGACGAGGCCGAAGAGGACACTGCTGGAAACCCAGTGGTAGGGAAGCAGGAACGGGCCAGGCTCAGACAACTCCAGAAACTGAAGAAGCAGAAGATCAAAGAGATATTACAGACCCAGAATGCTGCCATCGATGCTGACATGAACAAGAAAGGGCAA…	chr3H:22222801-22230583	Horvu_OUN333_3H01G074300	ATGGCGAGGCCGTCGAGGCGCCGCGTGGTGGTGGAGGAGGAGGAGTCCTCCGTCGAGGAGCAGCAGGGCCGGCCCGACGCCGGCGGGTCCGGATCCGGCGGGGAGGGGGGAGCGGGTCAGGCGGAGGAGGAGGAGATCGACGAGGAGGAGATCGAGGCCGTCACCACCGGCGCCGGCGCCGACGACGAGGGGGAGGAGGACGGGGAAGGGGACGAGGAGGAGCCGGAGCCCACCGACGACGACGAGGCCGAAGAGGACACCTCTGGAAACCCAGTGGTAGGGAAGCAGGAACGGGCCAGGCTCAGACAACTCCAGAAACTGAAGAAGCAGAAGATCAAAGAGATATTACAGACCCAGAATGCTGCCATCGATGCTGACATGAACAAGAAAGGGCAAGGG…	chr3H:23293757-23302039
	ALC1	HORVU.MOREX.r3.4HG0416240	ATGGCGGCCACCGCCTACGAGCGCCGCCTGCTCGCCGCCGCCGACCTCGTCCTCTCCGCCGACGGGAAGTCCCAGCTCCCCCGCCTCTCCTCCGCCGACCTCGGGGTCACTGCCGACCTCAAGCCGCACCAGCTCGACGGCGTCCACTGGCTCATCCGCCGCTACCACCTCGGCGTCAACGTCCTGCTCGGCGACGAGATGGGGCTGGGGAAGACCCTGCAGGCAATTTCTCTGCTGAGCTACCTGAAGATCAAATCCATCGCCCCCGGGCCGTTCCTGGTGTTATGCCCTCTGAGCGTGACGGATGGCTGGTTGTCGGAGTTCGGTAAATTCTGCCCTACATTGAAGGTCATCCAGTATGTCGGTGATAAGGCGCATCGTCGTCATATACGGAGAACG…	chr4:604202142-604216997	Horvu_AKASHIN_4H01G511900	ATGGCGGCCACCGCCTACGAGCGCCGCCTGCTCGCCGCCGCCGACCTCGTCCTCTCCGCCGACGGGAAGTCCCAGCTCCCCCGCCTCTCCTCCGCCGACCTCGGGGTCACTGCCGACCTCAAGCCGCACCAGCTCGACGGCGTCCACTGGCTCATCCGCCGCTACCACCTCGGCGTCAACGTCCTGCTCGGCGACGAGATGGGGCTGGGGAAGACCCTGCAGGCAATTTCTCTGCTGAGCTACCTGAAGATCAAATCCATCGCCCCCAGGCCGTTCCTGGTGTTATGCCCTCTGAGCGTGACGGATGGCTGGTTGTCGGAGTTCGGTAAATTCTGCCCTACATTGAAGGTCATCCAGTATGTCGGTGATAAGGCGCATCGTCGTCATATACGGAGAACG…	chr4H:642844196-642851281	Horvu_BARKE_4H01G521200	ATGGCGGCCACCGCCTACGAGCGCCGCCTGCTCGCCGCCGCCGACCTCGTCCTCTCCGCCGACGGGAAGTCCCAGCTCCCCCGCCTCTCCTCCGCCGACCTCGGGGTCACTGCCGACCTCAAGCCGCACCAGCTCGACGGCGTCCACTGGCTCATCCGCCGCTACCACCTCGGCGTCAACGTCCTGCTCGGCGACGAGATGGGGCTGGGGAAGACCCTGCAGGCAATTTCTCTGCTGAGCTACCTGAAGATCAAATCCATCGCCCCCGGGCCGTTCCTGGTGTTATGCCCTCTGAGCGTGACGGATGGCTGGTTGTCGGAGTTCGGTAAATTCTGCCCTACATTGAAGGTCATCCAGTATGTCGGTGATAAGGCGCATCGTCGTCATATACGGAGAACG…	chr4H:599921136-599936038	N/A	N/A	CAJNQB010000670.1:111081-112348	Horvu_HOCKETT_4H01G503100	ATGGCGGCCACCGCCTACGAGCGCCGCCTGCTCGCCGCCGCCGACCTCGTCCTCTCCGCAGACGGGAAGTCCCAGCTCCCCCGCCTCTCCTCCGCCGACCTCGGGGTCACTGCCGACCTCAAGCCGCACCAGCTCGACGGCGTCCACTGGCTCATCCGCCGCTACCACCTCGGCGTCAACGTCCTGCTCGGCGACGAGATGGGGCTGGGGAAGACCCTGCAGGCAATTTCTCTGCTGAGCTACCTGAAGATCAAATCCATCGCCCCCAGGCCGTTCCTGGTGTTATGCCCTCTGAGCGTGACGGATGGCTGGTTGTCGGAGTTCGGTAAATTCTGCCCTACATTGAAGGTCATCCAGTATGTCGGTGATAAGGCGCATCGTCGTCATATACGGAGAACG…	chr4H:596047049-596068095	Horvu_10350_4H01G530900	ATGGCGGCCACCGCCTACGAGCGCCGCCTGCTCGCCGCCGCCGACCTCGTCCTCTCCGCCGACGGGAAGTCCCAGCTCCCCCGCCTCTCCTCCGCCGACCTCGGGGTCACTGCCGACCTCAAGCCGCACCAGCTCGACGGCGTCCACTGGCTCATCCGCCGCTACCACCTCGGCGTCAACGTCCTGCTCGGCGACGAGATGGGGCTGGGGAAGACCCTGCAGGCAATTTCTCTGCTGAGCTACCTGAAGATCAAATCCATCGCCCCCGGGCCGTTCCTGGTGTTGTGCCCTCTGAGCGTGACGGATGGCTGGTTGTCGGAGTTCGGTAAATTCTGCCCTAGCTTGAAGGTCATCCAGTATGTCGGTGATAAGGCGCATCGTCGTCATATACGGAGAACG…	chr4H:608257033-608266992	Horvu_13821_4H01G512400	ATGGCGGCCACCGCCTACGAGCGCCGCCTGCTCGCCGCCGCCGACCTCGTCCTCTCCGCAGACGGGAAGTCCCAGCTCCCCCGCCTCTCCTCCGCCGACCTCGGGGTCACTGCCGACCTCAAGCCGCACCAGCTCGACGGCGTCCACTGGCTCATCCGCCGCTACCACCTCGGCGTCAACGTCCTGCTCGGCGACGAGATGGGGCTGGGGAAGACCCTGCAGGCAATTTCTCTGCTGAGCTACCTGAAGATCAAATCCATCGCCCCCAGGCCGTTCCTGGTGTTATGCCCTCTGAGCGTGACGGATGGCTGGTTGTCGGAGTTCGGTAAATTCTGCCCTACATTGAAGGTCATCCAGTATGTCGGTGATAAGGCGCATCGTCGTCATATACGGAGAACG…	chr4H:632761134-632782178	Horvu_13942_4H01G516400	ATGGCGGCCACCGCCTACGAGCGCCGCCTGCTCGCCGCCGCCGACCTCGTCCTCTCCGCCGACGGGAAGTCCCAGCTCCCCCGCCTCTCCTCCGCCGACCTCGGGGTCACTGCCGACCTCAAGCCGCACCAGCTCGACGGCGTCCACTGGCTCATCCGCCGCTACCACCTCGGCGTCAACGTCCTGCTCGGCGACGAGATGGGGCTGGGGAAGACCCTGCAGGCAATTTCTCTGCTGAGCTACCTGAAGATCAAATCCATCGCCCCCAGGCCGTTCCTGGTGTTATGCCCTCTGAGCGTGACGGATGGCTGGTTGTCGGAGTTCGGTAAATTCTGCCCTACATTGAAGGTCATCCAGTATGTCGGTGATAAGGCGCATCGTCGTCATATACGGAGAACG…	chr4H:618138890-618145975	Horvu_21599_4H01G512500	ATGGCGGCCACCGCCTACGAGCGCCGCCTGCTCGCCGCCGCCGACCTCGTCCTCTCCGCCGACGGGAAGTCCCAGCTCCCCCGCCTCTCCTCCGCCGACCTCGGGGTCACTGCCGACCTCAAGCCGCACCAGCTCGACGGCGTCCACTGGCTCATCCGCCGCTACCACCTCGGCGTCAACGTCCTGCTCGGCGACGAGATGGGGCTGGGGAAGACCCTGCAGGCAATTTCTCTGCTGAGCTACCTGAAGATCAAATCCATCGCCCCCGGGCCGTTCCTGGTGTTGTGCCCTCTGAGCGTGACGGATGGCTGGTTGTCGGAGTTCGGTAAATTCTGCCCTAGCTTGAAGGTCATCCAGTATGTCGGTGATAAGGCGCATCGTCGTCATATACGGAGAACG…	chr4H:633444974-633452070	Horvu_3081_4H01G502500	ATGGCGGCCACCGCCTACGAGCGCCGCCTGCTCGCCGCCGCCGACCTCGTCCTCTCCGCCGACGGGAAGTCCCAGCTCCCCCGCCTCTCCTCCGCCGACCTCGGGGTCACTGCCGACCTCAAGCCGCACCAGCTCGACGGCGTCCACTGGCTCATCCGCCGCTACCACCTCGGCGTCAACGTCCTGCTCGGCGACGAGATGGGGCTGGGGAAGACCCTGCAGGCAATTTCTCTGCTGAGCTACCTGAAGATCAAATCCATCGCCCCCGGGCCGTTCCTGGTGTTATGCCCTCTGAGCGTGACGGATGGCTGGTTGTCGGAGTTCGGTAAATTCTGCCCTACATTGAAGGTCATCCAGTATGTCGGTGATAAGGCGCATCGTCGTCATATACGGAGAACG…	chr4H:614341878-614356733	Horvu_HHOR_4H01G515300	ATGGCGGCCACCGCCTACGAGCGCCGCCTGCTCGCCGCCGCCGACCTCGTCCTCTCCGCCGACGGGAAGTCCCAGCTCCCCCGCCTCTCCTCCGCCGACCTCGGGGTCACTGCCGACCTCAAGCCGCACCAGCTCGACGGCGTCCACTGGCTCATCCGCCGCTACCACCTCGGCGTCAACGTCCTGCTCGGCGACGAGATGGGGCTGGGGAAGACCCTGCAGGCAATTTCTCTGCTGAGCTACCTGAAGATCAAATCCATCGCCCCCGGGCCGTTCCTGGTGTTGTGCCCTCTGAGCGTGACGGATGGCTGGTTGTCGGAGTTCGGTAAATTCTGCCCTAGCTTGAAGGTCATCCAGTATGTCGGTGATAAGGCGCATCGTCGTCATATACGGAGAACG…	chr4H:659000320-659011107	Horvu_7552_4H01G498600	ATGGCGGCCACCGCCTACGAGCGCCGCCTGCTCGCCGCCGCCGACCTCGTCCTCTCCGCAGACGGGAAGTCCCAGCTCCCCCGCCTCTCCTCCGCCGACCTCGGGGTCACTGCCGACCTCAAGCCGCACCAGCTCGACGGCGTCCACTGGCTCATCCGCCGCTACCACCTCGGCGTCAACGTCCTGCTCGGCGACGAGATGGGGCTGGGGAAGACCCTGCAGGCAATTTCTCTGCTGAGCTACCTGAAGATCAAATCCATCGCCCCCAGGCCGTTCCTGGTGTTATGCCCTCTGAGCGTGACGGATGGCTGGTTGTCGGAGTTCGGTAAATTCTGCCCTACATTGAAGGTCATCCAGTATGTCGGTGATAAGGCGCATCGTCGTCATATACGGAGAACG…	chr4H:612713693-612734739	Horvu_8148_4H01G516200	ATGGCGGCCACCGCCTACGAGCGCCGCCTGCTCGCCGCCGCCGACCTCGTCCTCTCCGCAGACGGGAAGTCCCAGCTCCCCCGCCTCTCCTCCGCCGACCTCGGGGTCACTGCCGACCTCAAGCCGCACCAGCTCGACGGCGTCCACTGGCTCATCCGCCGCTACCACCTCGGCGTCAACGTCCTGCTCGGCGACGAGATGGGGCTGGGGAAGACCCTGCAGGCAATTTCTCTGCTGAGCTACCTGAAGATCAAATCCATCGCCCCCAGGCCGTTCCTGGTGTTATGCCCTCTGAGCGTGACGGATGGCTGGTTGTCGGAGTTCGGTAAATTCTGCCCTACATTGAAGGTCATCCAGTATGTCGGTGATAAGGCGCATCGTCGTCATATACGGAGAACG…	chr4H:620113100-620134557	Horvu_9043_4H01G501800	ATGGCGGCCACCGCCTACGAGCGCCGCCTGCTCGCCGCCGCCGACCTCGTCCTCTCCGCCGACGGGAAGTCCCAGCTCCCCCGCCTCTCCTCCGCCGACCTCGGGGTCACTGCCGACCTCAAGCCGCACCAGCTCGACGGCGTCCACTGGCTCATCCGCCGCTACCACCTCGGCGTCAACGTCCTGCTCGGCGACGAGATGGGGCTGGGGAAGACCCTGCAGGCAATTTCTCTGCTGAGCTACCTGAAGATCAAATCCATCGCCCCCGGGCCGTTCTTGGTGTTATGCCCTCTGAGCGTGACGGATGGCTGGTTGTCGGAGTTCGGTAAATTCTGCCCTACATTGAAGGTCATCCAGTATGTCGGTGATAAGGCGCATCGTCGTCATATACGGAGAACG…	chr4H:619200987-619222214	Horvu_IGRI_4H01G512900	ATGGCGGCCACCGCCTACGAGCGCCGCCTGCTCGCCGCCGCCGACCTCGTCCTCTCCGCCGACGGGAAGTCCCAGCTCCCCCGCCTCTCCTCCGCCGACCTCGGGGTCACTGCCGACCTCAAGCCGCACCAGCTCGACGGCGTCCACTGGCTCATCCGCCGCTACCACCTCGGCGTCAACGTCCTGCTCGGCGACGAGATGGGGCTGGGGAAGACCCTGCAGGCAATTTCTCTGCTGAGCTACCTGAAGATCAAATCCATCGCCCCCGGGCCGTTCCTGGTGTTATGCCCTCTGAGCGTGACGGATGGCTGGTTGTCGGAGTTCGGTAAATTCTGCCCTACATTGAAGGTCATCCAGTATGTCGGTGATAAGGCGCATCGTCGTCATATACGGAGAACG…	chr4H:615795015-615809869	Horvu_OUN333_4H01G515400	ATGGCGGCCACCGCCTACGAGCGCCGCCTGCTCGCCGCCGCCGACCTCGTCCTCTCCGCCGACGGGAAGTCCCAGCTCCCCCGCCTCTCCTCCGCCGACCTCGGGGTCACTGCCGACCTCAAGCCGCACCAGCTCGACGGCGTCCACTGGCTCATCCGCCGCTACCACCTCGGCGTCAACGTCCTGCTCGGCGACGAGATGGGGCTGGGGAAGACCCTGCAGGCAATTTCTCTGCTGAGCTACCTGAAGATCAAATCCATCGCCCCCAGGCCGTTCCTGGTGTTATGCCCTCTGAGCGTGACGGATGGCTGGTTGTCGGAGTTCGGTAAATTCTGCCCTACATTGAAGGTCATCCAGTATGTCGGTGATAAGGCGCATCGTCGTCATATACGGAGAACG…	chr4H:639696307-639703392
	Chd1	HORVU.MOREX.r3.2HG0116700	ATGGCATTCTTCAGCAATTCTGGGAGCAGGGCTGATTCGGGAGGGTACAACTTGAATGAGAAGGCTGATGATGAAGGCGCATATGAGTCAGTCAGGGATAGGGACGCCGACTTGAGCTCTGGCCAGTTGAACTTGAATGAGAAGGCTGATGATGCCTACCACAGTGAGGAGGAGCAATACGAAGCTGGCCAGTCAGGTCTGAACCCTTCTGAGATTAAATCAGGGCAGAATGCCCAGAGAGCAGGTGGCCCTTCTGGCTCATGGGGTACAAACTTTTTGAAGGACTGCAGATCCACGGAAGGGGAAGAACCCTCAAATAGTGATAGGGGAATGGAAGACGGGTCTGCGGCTAGCTCACATGATGACATGGATGGTAGTGGAGATGATGATGAGCTAAAC…	chr2:55126477-55143094	Horvu_AKASHIN_2H01G140600	ATGGCATTCTTCAGCAATTCTGGGAGCAGGGCTGATTCGGGAGGGTACAACTTGAATGAGAAGGCTGATGATGAAGGCGCATATGAGTCAGTCAGGGATAGGGACGCCGACTTGAGCTCTGGCCAGTTGAACTTGAATGAGAAGGCTGATGATGCCTACCACAGTGAGGAGGAGCAATACGAAGCTGGCCAGTCAGGTCTGAACCCTTCTGAGATTAAATCAGGGCAGAATGCCCAGAGAGCAGGTGGCCCTTCTGGCTCATGGGGTACAAACTTTTTGAAGGACTGCAGATCCACGGAAGGGGAAGAACCCTCAAATAGTGATAGGGGAATGGAAGACGGGTCTGCGGCTAGCTCACATGATGACATGGATGGTAGTGGAGATGATGATGAGCTAAAC…	chr2H:55699568-55716188	Horvu_BARKE_2H01G149000	ATGGCATTCTTCAGCAATTCTGGGAGCAGGGCTGATTCGGGAGGGTACAACTTGAATGAGAAGGCTGATGATGAAGGCACATATGAGTCAGTCAGGGATAGGGACGCCGACTTGAGCTCTGGCCAGTTGAACTTGAATGAGAAGGCTGATGATGCCTACCACAGTGAGGAGGAGCAATACGAAGCTGGCCAGTCAGGTCTGAACCCTTCTGAGATTAAATCAGGGCAGAATGCCCAGAGAGCAGGTGGCCCTTCTGGCTCATGGGGTACAAACTTTTTGAAGGACTGCAGATCCACGGAAGGGGAAGAACCCTCAAATAGTGATAGGGGAATGGAAGACGGGTCTGCGGCTAGCTCACATGATGACATGGATGGTAGTGGAGATGATGATGAGCTAAAC…	chr2H:51788338-51804944	Horvu_GOLDEN_2H01G121500	ATGGCATTCTTCAGCAATTCTGGGAGCAGGGCTGATTCGGGAGGGTACAACTTGAATGAGAAGGCTGATGATGAAGGCACATATGAGTCAGTCAGGGATAGGGACGCCGACTTGAGCTCTGGCCAGTTGAACTTGAATGAGAAGGCTGATGATGCCTACCACAGTGAGGAGGAGCAATACGAAGCTGGCCAGTCAGGTCTGAACCCTTCTGAGATTAAATCAGGGCAGAATGCCCAGAGAGCAGGTGGCCCTTCTGGCTCATGGGGTACAAACTTTTTGAAGGACTGCAGATCCACGGAAGGGGAAGAACCCTCAAATAGTGATAGGGGAATGGAAGACGGGTCTGCGGCTAGCTCACATGATGACATGGATGGTAGTGGAGATGATGATGAGCTAAAC…	chr2H:41535274-41551881	Horvu_HOCKETT_2H01G124600	ATGGCATTCTTCAGCAATTCTGGGAGCAGGGCTGATTCGGGAGGGTACAACTTGAATGAGAAGGCTGATGATGAAGGCGCATATGAGTCAGTCAGGGATAGGGACGCCGACTTGAGCTCTGGCCAGTTGAACTTGAATGAGAAGGCTGATGATGCCTACCACAGTGAGGAGGAGCAATACGAAGCTGGCCAGTCAGGTCTGAACCCTTCTGAGATTAAATCAGGGCAGAATGCCCAGAGAGCAGGTGGCCCTTCTGGCTCATGGGGTACAAACTTTTTGAAGGACTGCAGATCCACGGAAGGGGAAGAACCCTCAAATAGTGATAGGGGAATGGAAGACGGGTCTGCGGCTAGCTCACATGATGACATGGATGGTAGTGGAGATGATGATGAGCTAAAC…	chr2H:44423705-44440320	Horvu_10350_2H01G145100	ATGGCATTCTTCAGCAATTCTGGGAGCAGGGCTGATTCGGGAGGGTACAACTTGAATGAGAAGGCTGATGATGAAGGCGCATATGAGTCAGTCAGGGATAGGGACGCCGACTTGAGCTCTGGCCAGTTGAACTTGAATGAGAAGGCTGATGATGCCTACCACAGTGAGGAGGAGCAATACGAAGCTGGCCAGTCAGGTCTGAACCCTTCTGAGATTAAATCAGGGCAGAATGCCCAGAGAGCAGGTGGCCCTTCTGGCTCATGGGGTACAAACTTTTTGAAGGACTGCAGATCCACGGAAGGGGAAGAACCCTCAAATAGTGATAGGGGAATGGAAGACGGGTCTGCGGCTAGCTCACATGATGACATGGATGGTAGTGGAGATGATGATGAGCTAAAC…	chr2H:52095588-52112203	Horvu_13821_2H01G142600	ATGGCATTCTTCAGCAATTCTGGGAGCAGGGCTGATTCGGGAGGGTACAACTTGAATGAGAAGGCTGATGATGAAGGCGCATATGAGTCAGTCAGGGATAGGGACGCCGACTTGAGCTCTGGCCAGTTGAACTTGAATGAGAAGGCTGATGATGCCTACCACAGTGAGGAGGAGCAATACGAAGCTGGCCAGTCAGGTCTGAACCCTTCTGAGATTAAATCAGGGCAGAATGCCCAGAGAGCAGGTGGCCCTTCTGGCTCATGGGGTACAAACTTTTTGAAGGACTGCAGATCCACGGAAGGGGAAGAACCCTCAAATAGTGATAGGGGAATGGAAGACGGGTCTGCGGCTAGCTCACATGATGACATGGATGGTAGTGGAGATGATGATGAGCTAAAC…	chr2H:54958774-54975388	Horvu_13942_2H01G141500	ATGGCATTCTTCAGCAATTCTGGGAGCAGGGCTGATTCGGGAGGGTACAACTTGAATGAGAAGGCTGATGATGAAGGCGCATATGAGTCAGTCAGGGATAGGGACGCCGACTTGAGCTCTGGCCAGTTGAACTTGAATGAGAAGGCTGATGATGCCTACCACAGTGAGGAGGAGCAATACGAAGCTGGCCAGTCAGGTCTGAACCCTTCTGAGATTAAATCAGGGCAGAATGCCCAGAGAGCAGGTGGCCCTTCTGGCTCATGGGGTACAAACTTTTTGAAGGACTGCAGATCCACGGAAGGGGAAGAACCCTCAAATAGTGATAGGGGAATGGAAGACGGGTCTGCGGCTAGCTCACATGATGACATGGATGGTAGTGGAGATGATGATGAGCTAAAC…	chr2H:51380584-51397675	Horvu_21599_2H01G140300	ATGGCATTCTTCAGCAATTCTGGGAGCAGGGCTGATTCGGGAGGGTACAACTTGAATGAGAAGGCTGATGATGAAGGCGCATATGAGTCAGTCAGGGATAGGGACGCCGACTTGAGCTCTGGCCAGTTGAACTTGAATGAGAAGGCTGATGATGCCTACCACAGTGAGGAGGAGCAATACGAAGCTGGCCAGTCAGGTCTGAACCCTTCTGAGATTAAATCAGGGCAGAATGCCCAGAGAGCAGGTGGCCCTTCTGGCTCATGGGGTACAAACTTTTTGAAGGACTGCAGATCCACGGAAGGGGAAGAACCCTCAAATAGTGATAGGGGAATGGAAGACGGGTCTGCGGCTAGCTCACATGATGACATGGATGGTAGTGGAGATGATGATGAGCTAAAC…	chr2H:54575008-54591623	Horvu_3081_2H01G143500	ATGGCATTCTTCAGCAATTCTGGGAGCAGGGCTGATTCGGGAGGGTACAACTTGAATGAGAAGGCTGATGATGAAGGCACATATGAGTCAGTCAGGGATAGGGACGCCGACTTGAGCTCTGGCCAGTTGAACTTGAATGAGAAGGCTGATGATGCCTACCACAGTGAGGAGGAGCAATACGAAGCTGGCCAGTCAGGTCTGAACCCTTCTGAGATTAAATCAGGGCAGAATGCCCAGAGAGCAGGTGGCCCTTCTGGCTCATGGGGTACAAACTTTTTGAAGGACTGCAGATCCACGGAAGGGGAAGAACCCTCAAATAGTGATAGGGGAATGGAAGACGGGTCTGCGGCTAGCTCACATGATGACATGGATGGTAGTGGAGATGATGATGAGCTAAAC…	chr2H:52340286-52356893	Horvu_HHOR_2H01G138500	ATGGCATTCTTCAGCAATTCTGGGAGCAGGGCTGATTCGGGAGGGTACAACTTGAATGAGAAGGCTGATGATGAAGGCGCATATGAGTCAGTCAGGGATAGGGACGCCGACTTGAGCTCTGGCCAGTTGAACTTGAATGAGAAGGCTGATGATGCCTACCACAGTGAGGAGGAGCAATACGAAGCTGGCCAGTCAGGTCTGAACCCTTCTGAGATTAAATCAGGGCAGAATGCCCAGAGAGCAGGTGGCCCTTCTGGCTCATGGGGTACAAACTTTTTGAAGGACTGCAGATCCACGGAAGGGGAAGAACCCTCAAATAGTGATAGGGGAATGGAAGACGGGTCTGCGGCTAGCTCACATGATGACATGGATGGTAGTGGAGATGATGATGAGCTAAAC…	chr2H:57005452-57022881	Horvu_7552_2H01G141600	ATGGCATTCTTCAGCAATTCTGGGAGCAGGGCTGATTCGGGAGGGTACAACTTGAATGAGAAGGCTGATGATGAAGGCGCATATGAGTCAGTCAGGGATAGGGACGCCGACTTGAGCTCTGGCCAGTTGAACTTGAATGAGAAGGCTGATGATGCCTACCACAGTGAGGAGGAGCAATACGAAGCTGGCCAGTCAGGTCTGAACCCTTCTGAGATTAAATCAGGGCAGAATGCCCAGAGAGCAGGTGGCCCTTCTGGCTCATGGGGTACAAACTTTTTGAAGGACTGCAGATCCACGGAAGGGGAAGAACCCTCAAATAGTGATAGGGGAATGGAAGACGGGTCTGCGGCTAGCTCACATGATGACATGGATGGTAGTGGAGATGATGATGAGCTAAAC…	chr2H:51176642-51193257	Horvu_8148_2H01G144800	ATGGCATTCTTCAGCAATTCTGGGAGCAGGGCTGATTCGGGAGGGTACAACTTGAATGAGAAGGCTGATGATGAAGGCGCATATGAGTCAGTCAGGGATAGGGACGCCGACTTGAGCTCTGGCCAGTTGAACTTGAATGAGAAGGCTGATGATGCCTACCACAGTGAGGAGGAGCAATACGAAGCTGGCCAGTCAGGTCTGAACCCTTCTGAGATTAAATCAGGGCAGAATGCCCAGAGAGCAGGTGGCCCTTCTGGCTCATGGGGTACAAACTTTTTGAAGGACTGCAGATCCACGGAAGGGGAAGAACCCTCAAATAGTGATAGGGGAATGGAAGACGGGTCTGCGGCTAGCTCACATGATGACATGGATGGTAGTGGAGATGATGATGAGCTAAAC…	chr2H:53467149-53483764	Horvu_9043_2H01G143300	ATGGCATTCTTCAGCAATTCTGGGAGCAGGGCTGATTCGGGAGGGTACAACTTGAATGAGAAGGCTGATGATGAAGGCGCATATGAGTCAGTCAGGGATAGGGACGCCGACTTGAGCTCTGGCCAGTTGAACTTGAATGAGAAGGCTGATGATGCCTACCACAGTGAGGAGGAGCAATACGAAGCTGGCCAGTCAGGTCTGAACCCTTCTGAGATTAAATCAGGGCAGAATGCCCAGAGAGCAGGTGGCCCTTCTGGCTCATGGGGTACAAACTTTTTGAAGGACTGCAGATCCACGGAAGGGGAAGAACCCTCAAATAGTGATAGGGGAATGGAAGACGGGTCTGCGGCTAGCTCACATGATGACATGGATGGTAGTGGAGATGATGATGAGCTAAAC…	chr2H:53995577-54012192	Horvu_IGRI_2H01G142000	ATGGCATTCTTCAGCAATTCTGGGAGCAGGGCTGATTCGGGAGGGTACAACTTGAATGAGAAGGCTGATGATGAAGGCACATATGAGTCAGTCAGGGATAGGGACGCCGACTTGAGCTCTGGCCAGTTGAACTTGAATGAGAAGGCTGATGATGCCTACCACAGTGAGGAGGAGCAATACGAAGCTGGCCAGTCAGGTCTGAACCCTTCTGAGATTAAATCAGGGCAGAATGCCCAGAGAGCAGGTGGCCCTTCTGGCTCATGGGGTACAAACTTTTTGAAGGACTGCAGATCCACGGAAGGGGAAGAACCCTCAAATAGTGATAGGGGAATGGAAGACGGGTCTGCGGCTAGCTCACATGATGACATGGATGGTAGTGGAGATGATGATGAGCTAAAC…	chr2H:51538143-51554750	Horvu_OUN333_2H01G138500	ATGGCATTCTTCAGCAATTCTGGGAGCAGGGCTGATTCGGGAGGGTACAACTTGAATGAGAAGGCTGATGATGAAGGCGCATATGAGTCAGTCAGGGATAGGGACGCCGACTTGAGCTCTGGCCAGTTGAACTTGAATGAGAAGGCTGATGATGCCTACCACAGTGAGGAGGAGCAATACGAAGCTGGCCAGTCAGGTCTGAACCCTTCTGAGATTAAATCAGGGCAGAATGCCCAGAGAGCAGGTGGCCCTTCTGGCTCATGGGGTACAAACTTTTTGAAGGACTGCAGATCCACGGAAGGGGAAGAACCCTCAAATAGTGATAGGGGAATGGAAGACGGGTCTGCGGCTAGCTCACATGATGACATGGATGGTAGTGGAGATGATGATGAGCTAAAC…	chr2H:56633319-56649932
	Mi-2_1	HORVU.MOREX.r3.7HG0658830	ATGAGCAGCCTCGTGGAGCGGCTGCGCGTGCGGTCGGACAAGCGGCCCCGCTACATACTAGATGAGTCCGACGACGAATTCCCGCCGCGCGGCGGGAACGGGAAGGGGAAGGATCGGGACGGCGACCCCCCCGTCAAGCAGATCGAGCGCGAGGACGCGAAAGAAGATGCTTGCCGAAAATGTGGGCTAAATGATAATCTTGTATCTTGTACAACATGTACATATGCATTTCACCGGAAATGTCTGGTTCCTTGCCTAAATATCACATCTGATAAGTGGAGCTGCCCTGAATGTGTAAGCCCACTGACAGAGATGGAGAAGATATTAGATTGCGAAACGAAAGTTGCTTCTGAAGAGACTAGTTCTTCAGAGTCTGGATCAAATAAGAAACCTGTCAAG…	chr7:58032440-58051349	Horvu_AKASHIN_7H01G143000	ATGAGCAGCCTCGTGGAGCGGCTGCGCGTGCGGTCGGACAAGCGGCCCCGCTACATACTAGATGAGTCCGACGACGAATTCCCGCCGCGTGGCGGGAACGGGAAGGGGAAGGATCGGGACGGCGACCCCCCCGTCAAGCAGATCGAGCGCGAGGACGCGAAAGAAGATGCTTGCCGAAAATGTGGGCTAAATGATAATCTTGTATCTTGTACAACATGTACATATGCATTTCACCGGAAATGTCTGGTTCCTTGCCTAAATATCACATCTGATAAGTGGAGCTGCCCTGAATGTGTAAGCCCACTGACAGAGATGGAGAAGATATTAGATTGCGAAACGAAAGTTGCTTCTGAAGAGACTAGTTCTTCAGAGTCTGGATCAAATAAGAAACCTGTCAAG…	chr7H:53272780-53292196	Horvu_BARKE_7H01G157200	ATGAGCAGCCTCGTGGAGCGGCTGCGCGTGCGGTCGGACAAGCGGCCCCGCTACATACTAGATGAGTCCGACGACGAATTCCCGCCGCGCGGCGGGAACGGGAAGGGGAAGGATCGGGACGGCGACCCCCCCGTCAAGCAGATCGAGCGCGAGGACGCGAAAGAAGATGCTTGCCGAAAATGTGGGCTAAATGATAATCTTGTATCTTGTACAACATGTACATATGCATTTCACCGGAAATGTCTGGTTCCTTGCCTAAATATCACATCTGATAAGTGGAGCTGCCCTGAATGTGTAAGCCCACTGACAGAGATGGAGAAGATATTAGATTGCGAAACGAAAGTTGCTTCTGAAGAGACTAGTTCTTCAGAGTCTGGATCAAATAAGAAACCTGTCAAG…	chr7H:51736850-51755538	Horvu_GOLDEN_7H01G129700	ATGAGCAGCCTCGTGGAGCGGCTGCGCGTGCGGTCGGACAAGCGGCCCCGCTACATACTAGATGAGTCCGACGACGAATTCCCGCCGCGCGGCGGGAACGGGAAGGGGAAGGATCGGGACGGCGACCCCCCCGTCAAGCAGATCGAGCGCGAGGACGCGAAAGAAGATGCTTGCCGAAAATGTGGGCTAAATGATAATCTTGTATCTTGTACAACATGTACATATGCATTTCACCGGAAATGTCTGGTTCCTTGCCTAAATATCACATCTGATAAGTGGAGCTGCCCTGAATGTGTAAGCCCACTGACAGAGATGGAGAAGATATTAGATTGCGAAACGAAAGTTGCTTCTGAAGAGACTAGTTCTTCAGAGTCTGGATCAAATAAGAAACCTGTCAAG…	chr7H:42703003-42721784	N/A	N/A	chr7H:47642834-47747100	Horvu_10350_7H01G158800	ATGAGCAGCCTCGTGGAGCGGCTGCGCGTGCGGTCGGACAAGCGGCCCCGCTACATACTAGATGAGTCCGACGACGAATTCCCGCCGCGCGGCGGGAACGGGAAGGGGAAGGATCGGGACGGCGACCCCCCCGTCAAGCAGATCGAGCGCGAGGACGCGAAAGAAGATGCTTGCCGAAAATGTGGGCTAAATGATAATCTTGTATCTTGTACAACATGTACATATGCATTTCACCGGAAATGTCTGGTTCCTTGCCTAAATATCACATCTGATAAGTGGAGCTGCCCTGAATGTGTAAGCCCACTGACAGAGATGGAGAAGATATTAGATTGCGAAACGAAAGTTGCTTCTGAAGAGACTAGTTCTTCAGAGTCTGGATCAAATAAGAAACCTGTCAAG…	chr7H:53941747-53960652	Horvu_13821_7H01G145900	ATGAGCAGCCTCGTGGAGCGGCTGCGCGTGCGGTCGGACAAGCGGCCCCGCTACATACTAGATGAGTCCGACGACGAATTCCCGCCGCGCGGCGGGAACGGGAAGGGGAAGGATCGGGACGGCGACCCCCCCGTCAAGCAGATCGAGCGCGAGGACGCGAAAGAAGATGCTTGCCGAAAATGTGGGCTAAATGATAATCTTGTATCTTGTACAACATGTACATATGCATTTCACCGGAAATGTCTGGTTCCTTGCCTAAATATCACATCTGATAAGTGGAGCTGCCCTGAATGTGTAAGCCCACTGACAGAGATGGAGAAGATATTAGATTGCGAAACGAAAGTTGCTTCTGAAGAGACTAGTTCTTCAGAGTCTGGATCAAATAAGAAACCTGTCAAG…	chr7H:53532841-53552264	Horvu_13942_7H01G147500	ATGAGCAGCCTCGTGGAGCGGCTGCGCGTGCGGTCGGACAAGCGGCCCCGCTACATACTAGATGAGTCCGACGACGAATTCCCGCCGCGCGGCGGGAACGGGAAGGGGAAGGATCGGGACGGCGACCCCCCCGTCAAGCAGATCGAGCGCGAGGACGCGAAAGAAGATGCTTGCCGAAAATGTGGGCTAAATGATAATCTTGTATCTTGTACAACATGTACATATGCATTTCACCGGAAATGTCTGGTTCCTTGCCTAAATATCACATCTGATAAGTGGAGCTGCCCTGAATGTGTAAGCCCACTGACAGAGATGGAGAAGATATTAGATTGCGAAACGAAAGTTGCTTCTGAAGAGACTAGTTCTTCAGAGTCTGGATCAAATAAGAAACCTGTCAAG…	chr7H:52325010-52344127	Horvu_21599_7H01G154200	ATGAGCAGCCTCGTGGAGCGGCTGCGCGTGCGGTCGGACAAGCGGCCCCGCTACATACTAGATGAGTCCGACGACGAATTCCCGCCGCGCGGCGGGAACGGGAAGGGGAAGGATCGGGACGGCGACCCCCCCGTCAAGCAGATCGAGCGCGAGGACGCGAAAGAAGATGCTTGCCGAAAATGTGGGCTAAATGATAATCTTGTATCTTGTACAACATGTACATATGCATTTCACCGGAAATGTCTGGTTCCTTGCCTAAATATCACATCTGATAAGTGGAGCTGCCCTGAATGTGTAAGCCCACTGACAGAGATGGAGAAGATATTAGATTGCGAAACGAAAGTTGCTTCTGAAGAGACTAGTTCTTCAGAGTCTGGATCAAATAAGAAACCTGTCAAG…	chr7H:56861556-56881709	Horvu_3081_7H01G154000	ATGAGCAGCCTCGTGGAGCGGCTGCGCGTGCGGTCGGACAAGCGGCCCCGCTACATACTAGATGAGTCCGACGACGAATTCCCGCCGCGCGGCGGGAACGGGAAGGGGAAGGATCGGGACGGCGACCCCCCCGTCAAGCAGATCGAGCGCGAGGACGCGAAAGAAGATGCTTGCCGAAAATGTGGGCTAAATGATAATCTTGTATCTTGTACAACATGTACATATGCATTTCACCGGAAATGTCTGGTTCCTTGCCTAAATATCACATCTGATAAGTGGAGCTGCCCTGAATGTGTAAGCCCACTGACAGAGATGGAGAAGATATTAGATTGCGAAACGAAAGTTGCTTCTGAAGAGACTAGTTCTTCAGAGTCTGGATCAAATAAGAAACCTGTCAAG…	chr7H:52701555-52720374	Horvu_HHOR_7H01G149200	ATGAGCAGCCTCGTGGAGCGGCTGCGCGTGCGGTCGGACAAGCGGCCCCGCTACATACTAGATGAGTCCGACGACGAATTCCCGCCGCGCGGCGGGAACGGGAAGGGGAAGGATCGGGACGGCGACCCCCCCGTCAAGCAGATCGAGCGCGAGGACGCGAAAGAAGATGCTTGCCGAAAATGTGGGCTAAATGATAATCTTGTATCTTGTACAACATGTACATATGCATTTCACCGGAAATGTCTGGTTCCTTGCCTAAATGTCACATCTGATAAGTGGAGCTGCCCTGAATGTGTAAGCCCACTGACAGAGATGGAGAAGATATTAGATTGCGAAACGAAAGTTGCTTCTGAAGAGACTAGTTCTTCAGAGTCTGGATCAAATAAGAAACCTGTCAAG…	chr7H:57778395-57797597	Horvu_7552_7H01G149400	ATGAGCAGCCTCGTGGAGCGGCTGCGCGTGCGGTCGGACAAGCGGCCCCGCTACATACTAGATGAGTCCGACGACGAATTCCCGCCGCGCGGCGGGAACGGGAAGGGGAAGGATCGGGACGGCGACCCCCCCGTCAAGCAGATCGAGCGCGAGGACGCGAAAGAAGATGCTTGCCGAAAATGTGGGCTAAATGATAATCTTGTATCTTGTACAACATGTACATATGCATTTCACCGGAAATGTCTGGTTCCTTGCCTAAATATCACATCTGATAAGTGGAGCTGCCCTGAATGTGTAAGCCCACTGACAGAGATGGAGAAGATATTAGATTGCGAAACGAAAGTTGCTTCTGAAGAGACTAGTTCTTCAGAGTCTGGATCAAATAAGAAACCTGTCAAG…	chr7H:51083007-51101757	Horvu_8148_7H01G147400	ATGAGCAGCCTCGTGGAGCGGCTGCGCGTGCGGTCGGACAAGCGGCCCCGCTACATACTAGATGAGTCCGACGACGAATTCCCGCCGCGCGGCGGGAACGGGAAGGGGAAGGATCGGGACGGCGACCCCCCCGTCAAGCAGATCGAGCGCGAGGACGCGAAAGAAGATGCTTGCCGAAAATGTGGGCTAAATGATAATCTTGTATCTTGTACAACATGTACATATGCATTTCACCGGAAATGTCTGGTTCCTTGCCTAAATATCACATCTGATAAGTGGAGCTGCCCTGAATGTGTAAGCCCACTGACAGAGATGGAGAAGATATTAGATTGCGAAACGAAAGTTGCTTCTGAAGAGACTAGTTCTTCAGAGTCTGGATCAAATAAGAAACCTGTCAAG…	chr7H:51896056-51915093	Horvu_9043_7H01G152500	ATGAGCAGCCTCGTGGAGCGGCTGCGCGTGCGGTCGGACAAGCGGCCCCGCTACATACTAGATGAGTCCGACGACGAATTCCCGCCGCGCGGCGGGAACGGGAAGGGGAAGGATCGGGACGGCGACCCCCCCGTCAAGCAGATCGAGCGCGAGGACGCGAAAGAAGATGCTTGCCGAAAATGTGGGCTAAATGATAATCTTGTATCTTGTACAACATGTACATATGCATTTCACCGGAAATGTCTGGTTCCTTGCCTAAATATCACATCTGATAAGTGGAGCTGCCCTGAATGTGTAAGCCCACTGACAGAGATGGAGAAGATATTAGATTGCGAAACGAAAGTTGCTTCTGAAGAGACTAGTTCTTCAGAGTCTGGATCAAATAAGAAACCTGTCAAG…	chr7H:53623544-53643652	Horvu_IGRI_7H01G148300	ATGAGCAGCCTCGTGGAGCGGCTGCGCGTGCGGTCGGACAAGCGGCCCCGCTACATACTAGATGAGTCCGACGACGAATTCCCGCCGCGCGGCGGGAACGGGAAGGGGAAGGATCGGGACGGCGACCCCCCCGTCAAGCAGATCGAGCGCGAGGACGCGAAAGAAGATGCTTGCCGAAAATGTGGGCTAAATGATAATCTTGTATCTTGTACAACATGTACATATGCATTTCACCGGAAATGTCTGGTTCCTTGCCTAAATATCACATCTGATAAGTGGAGCTGCCCTGAATGTGTAAGCCCACTGACAGAGATGGAGAAGATATTAGATTGCGAAACGAAAGTTGCTTCTGAAGAGACTAGTTCTTCAGAGTCTGGATCAAATAAGAAACCTGTCAAG…	chr7H:52732299-52751115	Horvu_OUN333_7H01G155400	ATGAGCAGCCTCGTGGAGCGGCTGCGCGTGCGGTCGGACAAGCGGCCCCGCTACATACTAGATGAGTCCGACGACGAATTCCCGCCGCGTGGCGGGAACGGGAAGGGGAAGGATCGGGACGGCGACCCCCCCGTCAAGCAGATCGAGCGCGAGGACGCGAAAGAAGATGCTTGCCGAAAATGTGGGCTAAATGATAATCTTGTATCTTGTACAACATGTACATATGCATTTCACCGGAAATGTCTGGTTCCTTGCCTAAATATCACATCTGATAAGTGGAGCTGCCCTGAATGTGTAAGCCCACTGACAGAGATGGAGAAGATATTAGATTGCGAAACGAAAGTTGCTTCTGAAGAGACTAGTTCTTCAGAGTCTGGATCAAATAAGAAACCTGTCAAG…	chr7H:57428890-57448200
	Mi-2_2	HORVU.MOREX.r3.3HG0307470	ATGAGAGGCGGGAGTCGCCGGAGGGGGAGAGAGCGGCTGGGAGGCGCCGCCGCCGCACGGCCGCCGCGGGACGACCGCCCCGCCGACGTCGTCCAGGTCATCGAGCTCAGCGACGATGATGTGAAGTCAGCAACTCAGACAAAACCACCGAAAGGAGAAGTCATGGAAGGATGCGTGGCAGAGGATTTCAAGGCCCTCCCATGCGATTCCACCAAGGAAGTTTCCACAAAGAACCTGAGGCGTCTTAGCAAGCGAACAGCTGCTAGTGGTGCTGCAACTTCTGCGTTGCACGAGGATGAGGTAAAGGTTGCTGATGTCATGCTGAGCAATGATGAAGTAGGTGGGCAAATGTTGCCTCCACGTAGAAGCTCCAAACGCCTATGCAGACAGCAAATTCGA…	chr3:564819192-564830835	Horvu_AKASHIN_3H01G549900	ATGAGAGGCGGGAGTCGCCGGAGGGGGAGAGAGCGGCTGGGAGGCGCCGCCGCCGCACGGCCGCCGCGGGACGACCGCCCCGCCGACGTCGTCCAGGTCATCGAGCTCAGCGACGATGATGTGAAGTCAGCAACTCAGACAAAACCACCGAAAGGAGAAGTCATGGAAGGATGCGTGGCAGAGGATTTCAAGGCCCTCCCATGCGATTCCACCAAGGAAGTTTCCACAAAGAACCTGAGGCGTCTTAGCAAGCGAACAGCTGCTAGTGGTGCTGCAACTTCTGCGTTGCACGAGGATGAGGTAAAGGTTGCTGATGTCATGCTGAGCAATGATGAAGTAGGTGGGCAAATGTTGCCTCCACGTAGAAGCTCCAAACGCCTATGCAGACAGCAAATTCGA…	chr3H:597835810-597847443	Horvu_BARKE_3H01G552300	ATGAGAGGCGGGAGTCGCCGGAGGGGGAGAGAGCGGCTGGGAGGCGCCGCCGCCGCACGGCCGCCGCGGGACGACCGCCCCGCCGACGTCGTCCAGGTCATCGAGCTCAGCGACGATGATGTGAAGTCAGCAACTCAGACAAAACCACCGAAAGGAGAAGTCATGGAAGGATGCGTGGCAGAGGATTTCAAGGCCCTCCCATGCGATTCCACCAAGGAAGTTTCCACAAAGAACCTGAGGCGTCTTAGCAAGCGAACAGCTGCTAGTGGTGCTGCAACTTCTGCGTTGCACGAGGATGAGGTAAAGGTTGCTGATGTCATGCTGAGCAATGATGAAGTAGGTGGGCAAATGTTGCCTCCACGTAGAAGCTCCAAACGCCTATGCAGACAGCAAATTCGA…	chr3H:563247774-563259417	Horvu_GOLDEN_3H01G520900	ATGAGAGGCGGGAGTCGCCGGAGGGGGAGAGAGCGGCTGGGAGGCGCCGCCGCCGCACGGCCGCCGCGGGACGACCGCCCCGCCGACGTCGTCCAGGTCATCGAGCTCAGCGACGATGATGTGAAGTCAGCAACTCAGACAAAACCACCGAAAGGAGAAGTCATGGAAGGATGCGTGGCAGAGGATTTCAAGGCCCTCCCATGCGATTCCACCAAGGAAGTTTCCACAAAGAACCTGAGGCGTCTTAGCAAGCGAACAGCTGCTAGTGGTGCTGCAACTTCTGCGTTGCACGAGGATGAGGTAAAGGTTGCTGATGTCATGCTGAGCAATGATGAAGTAGGTGGGCAAATGTTGCCTCCACGTAGAAGCTCCAAACGCCTATGCAGACAGCAAATTCGA…	chr3H:530563289-530574932	Horvu_HOCKETT_3H01G536900	ATGAGAGGCGGGAGTCGCCGGAGGGGGAGAGAGCGGCTGGGAGGCGCCGCCGCCGCACGGCCGCCGCGGGACGACCGCCCCGCCGACGTCGTCCAGGTCATCGAGCTCAGCGACGATGATGTGAAGTCAGCAACTCAGACAAAACCACCGAAAGGAGAAGTCATGGAAGGATGCGTGGCAGAGGATTTCAAGGCCCTCCCATGCGATTCCACCAAGGAAGTTTCCACAAAGAACCTGAGGCGTCTTAGCAAGCGAACAGCTGCTAGTGGTGCTGCAACTTCTGCGTTGCACGAGGATGAGGTAAAGGTTGCTGATGTCATGCTGAGCAATGATGAAGTAGGTGGGCAAATGTTGCCTCCACGTAGAAGCTCCAAACGCCTATGCAGACAGCAAATTCGA…	chr3H:549091434-549103077	Horvu_10350_3H01G552500	ATGAGAGGCGGGAGTCGCCGGAGGGGGAGAGAGCGGCTGGGAGGCGCCGCCGCCGCACGGCCGCCGCGGGACGACCGCCCCGCCGACGTCGTCCAGGTCATCGAGCTCAGCGACGATGATGTGAAGTCAGCAACTCAGACAAAACCACCGAAAGGAGAAGTCATGGAAGGATGCGTGGCAGAGGATTTCAAGGCCCTCCCATGCGATTCCACCAAGGAAGTTTCCACAAAGAACCTGAGGCGTCTTAGCAAGCGAACAGCTGCTAGTGGTGCTGCAACTTCTGCGTTGCACGAGGATGAGGTAAAGGTTGCTGATGTCATGCTGAGCAATGATGAAGTAGGTGGGCAAATGTTGCCTCCACGTAGAAGCTCCAAACGCCTATGCAGACAGCAAATTCGA…	chr3H:561773044-561784687	N/A	N/A	chr3H:585741047-585747656	Horvu_13942_3H01G549700	ATGAGAGGCGGGAGTCGCCGGAGGGGGAGAGAGCGGCTGGGAGGCGCCGCCGCCGCACGGCCGCCGCGGGACGACCGCCCCGCCGACGTCGTCCAGGTCATCGAGCTCAGCGACGATGATGTGAAGTCAGCAACTCAGACAAAACCACCGAAAGGAGAAGTCATGGAAGGATGCGTGGCAGAGGATTTCAAGGCCCTCCCATGCGATTCCACCAAGGAAGTTTCCACAAAGAACCTGAGGCGTCTTAGCAAGCGAACAGCTGCTAGTGGTGCTGCAACTTCTGCGTTGCACGAGGATGAGGTAAAGGTTGCTGATGTCATGCTGAGCAATGATGAAGTAGGTGGGCAAATGTTGCCTCCACGTAGAAGCTCCAAACGCCTATGCAGACAGCAAATTCGA…	chr3H:578123961-578135604	Horvu_21599_3H01G553300	ATGAGAGGCGGGAGTCGCCGGAGGGGGAGAGAGCGGCTGGGAGGCGCCGCCGCCGCACGGCCGCCGCGGGACGACCGCCCCGCCGACGTCGTCCAGGTCATCGAGCTCAGCGACGATGATGTGAAGTCAGCAACTCAGACAAAACCACCGAAAGGAGAAGTCATGGAAGGATGCGTGGCAGAGGATTTCAAGGCCCTCCCATGCGATTCCACCAAGGAAGTTTCCACAAAGAACCTGAGGCGTCTTAGCAAGCGAACAGCTGCTAGTGGTGCTGCAACTTCTGCGTTGCACGAGGATGAGGTAAAGGTTGCTGATGTCATGCTGAGCAATGATGAAGTAGGTGGGCAAATGTTGCCTCCACGTAGAAGCTCCAAACGCCTATGCAGACAGCAAATTCGA…	chr3H:593276164-593287807	Horvu_3081_3H01G547200	ATGAGAGGCGGGAGTCGCCGGAGGGGGAGAGAGCGGCTGGGAGGCGCCGCCGCCGCACGGCCGCCGCGGGACGACCGCCCCGCCGACGTCGTCCAGGTCATCGAGCTCAGCGACGATGATGTGAAGTCAGCAACTCAGACAAAACCACCGAAAGGAGAAGTCATGGAAGGATGCGTGGCAGAGGATTTCAAGGCCCTCCCATGCGATTCCACCAAGGAAGTTTCCACAAAGAACCTGAGGCGTCTTAGCAAGCGAACAGCTGCTAGTGGTGCTGCAACTTCTGCGTTGCACGAGGATGAGGTAAAGGTTGCTGATGTCATGCTGAGCAATGATGAAGTAGGTGGGCAAATGTTGCCTCCACGTAGAAGCTCCAAACGCCTATGCAGACAGCAAATTCGA…	chr3H:577915608-577926767	Horvu_HHOR_3H01G545200	ATGAGAGGCGGGAGTCGCCGGAGGGGGAGAGAGCGGCTGGGAGGCGCCGCCGCCGCACGGCCGCCGCGGGACGACCGCCCCGCCGACGTCGTCCAGGTCATCGAGCTCAGCGACGATGATGTGAAGTCAGCAACTCAGACAAAACCACCGAAAGGAGAAGTCATGGAAGGATGCGTGGCAGAGGATTTCAAGGCCCTCCCATGCGATTCCACCAAGGAAGTTTCCACAAAGAACCTGAGGCGTCTTAGCAAGCGAACAGCTGCTAGTGGTGCTGCAACTTCTGCGTTGCACGAGGATGAGGTAAAGGTTGCTGATGTCATGCTGAGCAATGATGAAGTAGGTGGGCAAATGTTGCCTCCACGTAGAAGCTCCAAACGCCTATGCAGACAGCAAATTCGA…	chr3H:613761142-613772337	Horvu_7552_3H01G555200	ATGAGAGGCGGGAGTCGCCGGAGGGGGAGAGAGCGGCTGGGAGGCGCCGCCGCCGCACGGCCGCCGCGGGACGACCGCCCCGCCGACGTCGTCCAGGTCATCGAGCTCAGCGACGATGATGTGAAGTCAGCAACTCAGACAAAACCACCGAAAGGAGAAGTCATGGAAGGATGCGTGGCAGAGGATTTCAAGGCCCTCCCATGCGATTCCACCAAGGAAGTTTCCACAAAGAACCTGAGGCGTCTTAGCAAGCGAACAGCTGCTAGTGGTGCTGCAACTTCTGCGTTGCACGAGGATGAGGTAAAGGTTGCTGATGTCATGCTGAGCAATGATGAAGTAGGTGGGCAAATGTTGCCTCCACGTAGAAGCTCCAAACGCCTATGCAGACAGCAAATTCGA…	chr3H:577770829-577782462	Horvu_8148_3H01G553200	ATGAGAGGCGGGAGTCGCCGGAGGGGGAGAGAGCGGCTGGGAGGCGCCGCCGCCGCACGGCCGCCGCGGGACGACCGCCCCGCCGACGTCGTCCAGGTCATCGAGCTCAGCGACGATGATGTGAAGTCAGCAACTCAGACAAAACCACCGAAAGGAGAAGTCATGGAAGGATGCGTGGCAGAGGATTTCAAGGCCCTCCCATGCGATTCCACCAAGGAAGTTTCCACAAAGAACCTGAGGCGTCTTAGCAAGCGAACAGCTGCTAGTGGTGCTGCAACTTCTGCGTTGCACGAGGATGAGGTAAAGGTTGCTGATGTCATGCTGAGCAATGATGAAGTAGGTGGGCAAATGTTGCCTCCACGTAGAAGCTCCAAACGCCTATGCAGACAGCAAATTCGA…	chr3H:577162867-577174510	Horvu_9043_3H01G545000	ATGAGAGGCGGGAGTCGCCGGAGGGGGAGAGAGCGGCTGGGAGGCGCCGCCGCCGCACGGCCGCCGCGGGACGACCGCCCCGCCGACGTCGTCCAGGTCATCGAGCTCAGCGACGATGATGTGAAGTCAGCAACTCAGACAAAACCACCGAAAGGAGAAGTCATGGAAGGATGCGTGGCAGAGGATTTCAAGGCCCTCCCATGCGATTCCACCAAGGAAGTTTCCACAAAGAACCTGAGGCGTCTTAGCAAGCGAACAGCTGCTAGTGGTGCTGCAACTTCTGCGTTGCACGAGGATGAGGTAAAGGTTGCTGATGTCATGCTGAGCAATGATGAAGTAGGTGGGCAAATGTTGCCTCCACGTAGAAGCTCCAAACGCCTATGCAGACAGCAAATTCGA…	chr3H:580125021-580136664	Horvu_IGRI_3H01G546100	ATGAGAGGCGGGAGTCGCCGGAGGGGGAGAGAGCGGCTGGGAGGCGCCGCCGCCGCACGGCCGCCGCGGGACGACCGCCCCGCCGACGTCGTCCAGGTCATCGAGCTCAGCGACGATGATGTGAAGTCAGCAACTCAGACAAAACCACCGAAAGGAGAAGTCATGGAAGGATGCGTGGCAGAGGATTTCAAGGCCCTCCCATGCGATTCCACCAAGGAAGTTTCCACAAAGAACCTGAGGCGTCTTAGCAAGCGAACAGCTGCTAGTGGTGCTGCAACTTCTGCGTTGCACGAGGATGAGGTAAAGGTTGCTGATGTCATGCTGAGCAATGATGAAGTAGGTGGGCAAATGTTGCCTCCACGTAGAAGCTCCAAACGCCTATGCAGACAGCAAATTCGA…	chr3H:570541754-570553397	Horvu_OUN333_3H01G551600	ATGAGAGGCGGGAGTCGCCGGAGGGGGAGAGAGCGGCTGGGAGGCGCCGCCGCCGCACGGCCGCCGCGGGACGACCGCCCCGCCGACGTCGTCCAGGTCATCGAGCTCAGCGACGATGATGTGAAGTCAGCAACTCAGACAAAACCACCGAAAGGAGAAGTCATGGAAGGATGCGTGGCAGAGGATTTCAAGGCCCTCCCATGCGATTCCACCAAGGAAGTTTCCACAAAGAACCTGAGGCGTCTTAGCAAGCGAACAGCTGCTAGTGGCGCTGCAACTTCTGCGTTGCACGAGGATGAGGTAAAGGTTGCTGATGTCATGCTGAGCAATGATGAAGTAGGTGGGCAAATGTTGCCTCCACGTAGAAGCTCCAAACGCCTATGCAGACACCAAATTCGA…	chr3H:597414517-597425723
	Mi-2_3	HORVU.MOREX.r3.2HG0143700	ATGAAGGAGAGGAGTTCTTTATGTGATAGTGCAGCAGATGGAAATTGGGTTTCAAAATACAAAAGAAAGCGAAGCAAGTTAACAGCTAGCTCGTCAAATGAGCATGAGGCTACATCACCAACATCGGGCTCTCTAATGAACAATGGTTCCATAAAAAAGAGGTCCAAGCATGACACTAGCATTTCTACATCAGCCAAGAAGATAAGAGGACATGATGGGTATTTCTATGAGTGTGTAGAATGTGACCTTGGTGGCAATTTGTTGTGTTGCGATAGCTGTCCACGGACATACCACTTGGAATGTCTTAATCCTCCCCTTAAGCGTGCACCGCCTGGGAACTGGCAATGCCCAAGATGTTGTACGAAACAAGTTAGCTTGAAGTTGTTAGGAAATGCGGAC…	chr2:239845091-239858120	Horvu_AKASHIN_2H01G307000	ATGAAGGAGAGGAGTTCTTTATGTGATAGTGCAGCAGATGGAAATTGGGTTTCAAAATACAAAAGAAAGCGAAGCAAGTTAACAGCTAGCTCGTCAAATGAGCATGAGGCTACATCACCAACATCGGGCTCTCTAATGAACAATGGTTCCATAAAAAAGAGGTCCAAGCATGACACTAGCATTTCTACATCAGCCAAGAAGATAAGAGGACATGATGGGTATTTCTATGAGTGTGTAGAATGTGACCTTGGTGGCAATTTGTTGTGTTGCGATAGCTGTCCACGGACATACCACTTGGAATGTCTTAATCCTCCCCTTAAGCGTGCACCGCCTGGGAACTGGCAATGCCCAAGATGTTGTACGAAACAAGTTAGCTTGAAGTTGTTAGGAAATGCGGAC…	chr2H:250888332-250900693	Horvu_BARKE_2H01G317000	ATGAAGGAGAGGAGTTCTTTATGTGATAGTGCAGCAGATGGAAATTGGGTTTCAAAATACAAAAGAAAGCGAAGCAAGTTAACAGCTAGCTCGTCAAATGAGCATGAGGCTACATCACCAACATCGGGCTCTCTAATGAACAATGGTTCCATAAAAAAGAGGTCCAAGCATGACACTAGCATTTCTACATCAGCCAAGAAGATAAGAGGACATGATGGGTATTTCTATGAGTGTGTAGAATGTGACCTTGGTGGCAATTTGTTGTGTTGCGATAGCTGTCCACGGACATACCACTTGGAATGTCTTAATCCTCCCCTTAAGCGTGCACCGCCTGGGAACTGGCAATGCCCAAGATGTTGTACGAAACAAGTTAGCTTGAAGTTGTTAGGAAATGCGGAC…	chr2H:235217328-235229826	Horvu_GOLDEN_2H01G279400	ATGAAGGAGAGGAGTTCTTTATGTGATAGTGCAGCAGATGGAAATTGGGTTTCAAAATACAAAAGAAAGCGAAGCAAGTTAACAGCTAGCTCGTCAAATGAGCATGAGGCTACATCACCAACATCGGGCTCTCTAATGAACAATGGTTCCATAAAAAAGAGGTCCAAGCATGACACTAGCATTTCTACATCAGCCAAGAAGATAAGAGGACATGATGGGTATTTCTATGAGTGTGTAGAATGTGACCTTGGTGGCAATTTGTTGTGTTGCGATAGCTGTCCACGGACATACCACTTGGAATGTCTTAATCCTCCCCTTAAGCGTGCACCGCCTGGGAACTGGCAATGCCCAAGATGTTGTACGAAACAAGTTAGCTTGAAGTTGTTAGGAAATGCGGAC…	chr2H:217262086-217274774	Horvu_HOCKETT_2H01G289900	ATGAAGGAGAGGAGTTCTTTATGTGATAGTGCAGCAGATGGAAATTGGGTTTCAAAATACAAAAGAAAGCGAAGCAAGTTAACAGCTAGCTCGTCAAATGAGCATGAGGCTACATCACCAACATCGGGCTCTCTAATGAACAATGGTTCCATAAAAAAGAGGTCCAAGCATGACACTAGCATTTCTACATCAGCCAAGAAGATAAGAGGACATGATGGGTATTTCTATGAGTGTGTAGAATGTGACCTTGGTGGCAATTTGTTGTGTTGCGATAGCTGTCCACGGACATACCACTTGGAATGTCTTAATCCTCCCCTTAAGCGTGCACCGCCTGGGAACTGGCAATGCCCAAGATGTTGTACGAAACAAGTTAGCTTGAAGTTGTTAGGAAATGCGGAC…	chr2H:228232614-228244979	Horvu_10350_2H01G314700	ATGAAGGAGAGGAGTTCTTTATGTGATAGTGCAGCAGATGGAAATTGGGTTTCAAAATACAAAAGAAAGCGAAGCAAGTTAACAGCTAGCTCGTCAAATGAGCATGAGGCTACATCACCAACATCGGGCTCTCTAATGAACAATGGTTCCATAAAAAAGAGGTCCAAGCATGACACTAGCATTTCTACATCAGCCAAGAAGATAAGAGGACATGATGGGTATTTCTATGAGTGTGTAGAATGTGACCTTGGTGGCAATTTGTTGTGTTGCGATAGCTGTCCACGGACATACCACTTGGAATGTCTTAATCCTCCCCTTAAGCGTGCACCGCCTGGGAACTGGCAATGCCCAAGATGTTGTACGAAACAAGTTAGCTTGAAGTTGTTAGGAAATGCGGAC…	chr2H:235605244-235617712	Horvu_13821_2H01G307600	ATGAAGGAGAGGAGTTCTTTATGTGATAGTGCAGCAGATGGAAATTGGGTTTCAAAATACAAAAGAAAGCGAAGCAAGTTAACAGCTAGCTCGTCAAATGAGCATGAGGCTACATCACCAACATCGGGCTCTCTAATGAACAATGGTTCCATAAAAAAGAGGTCCAAGCATGACACTAGCATTTCTACATCAGCCAAGAAGATAAGAGGACATGATGGGTATTTCTATGAGTGTGTAGAATGTGACCTTGGTGGCAATTTGTTGTGTTGCGATAGCTGTCCACGGACATACCACTTGGAATGTCTTAATCCTCCCCTTAAGCGTGCACCGCCTGGGAACTGGCAATGCCCAAGATGTTGTACGAAACAAGTTAGCTTGAAGTTGTTAGGAAATGCGGAC…	chr2H:247593750-247606114	Horvu_13942_2H01G305900	ATGAAGGAGAGGAGTTCTTTATGTGATAGTGCAGCAGATGGAAATTGGGTTTCAAAATACAAAAGAAAGCGAAGCAAGTTAACAGCTAGCTCGTCAAATGAGCATGAGGCTACATCACCAACATCGGGCTCTCTAATGAACAATGGTTCCATAAAAAAGAGGTCCAAGCATGACACTAGCATTTCTACATCAGCCAAGAAGATAAGAGGACATGATGGGTATTTCTATGAGTGTGTAGAATGTGACCTTGGTGGCAATTTGTTGTGTTGCGATAGCTGTCCACGGACATACCACTTGGAATGTCTTAATCCTCCCCTTAAGCGTGCACCGCCTGGGAACTGGCAATGCCCAAGATGTTGTACGAAACAAGTTAGCTTGAAGTTGTTAGGAAATGCGGAC…	chr2H:240492614-240505402	Horvu_21599_2H01G305400	ATGAAGGAGAGGAGTTCTTTATGTGATAGTGCAGCAGATGGAAATTGGGTTTCAAAATACAAAAGAAAGCGAAGCAAGTTAACAGCTAGCTCGTCAAATGAGCATGAGGCTACATCACCAACATCGGGCTCTCTAATGAACAATGGTTCCATAAAAAAGAGGTCCAAGCATGACACTAGCATTTCTACATCAGCCAAGAAGATAAGAGGACATGATGGGTATTTCTATGAGTGTGTAGAATGTGACCTTGGTGGCAATTTGTTGTGTTGCGATAGCTGTCCACGGACATACCACTTGGAATGTCTTAATCCTCCCCTTAAGCGTGCACCGCCTGGGAACTGGCAATGCCCAAGATGTTGTACGAAACAAGTTAGCTTGAAGTTGTTAGGAAATGCGGAC…	chr2H:246035389-246048387	Horvu_3081_2H01G307200	ATGAAGGAGAGGAGTTCTTTATGTGATAGTGCAGCAGATGGAAATTGGGTTTCAAAATACAAAAGAAAGCGAAGCAAGTTAACAGCTAGCTCGTCAAATGAGCATGAGGCTACATCACCAACATCGGGCTCTCTAATGAACAATGGTTCCATAAAAAAGAGGTCCAAGCATGACACTAGCATTTCTACATCAGCCAAGAAGATAAGAGGACATGATGGGTATTTCTATGAGTGTGTAGAATGTGACCTTGGTGGCAATTTGTTGTGTTGCGATAGCTGTCCACGGACATACCACTTGGAATGTCTTAATCCTCCCCTTAAGCGTGCACCGCCTGGGAACTGGCAATGCCCAAGATGTTGTACGAAACAAGTTAGCTTGAAGTTGTTAGGAAATGCGGAC…	chr2H:239838136-239850501	Horvu_HHOR_2H01G302900	ATGAAGGAGAGGAGTTCTTTATGTGATAGTGCAGCAGATGGAAATTGGGTTTCAAAATACAAAAGAAAGCGAAGCAAGTTAACAGCTAGCTCGTCAAATGAGCATGAGGCTACATCACCAACATCGGGCTCTCTAATGAACAATGGTTCCATAAAAAAGAGGTCCAAGCATGACACTAGCATTTCTACATCAGCCAAGAAGATAAGAGGACATGATGGGTATTTCTATGAGTGTGTAGAATGTGACCTTGGTGGCAATTTGTTGTGTTGCGATAGCTGTCCACGGACATACCACTTGGAATGTCTTAATCCTCCCCTTAAGCGTGCACCGCCTGGGAACTGGCAATGCCCAAGATGTTGTACGAAACAAGTTAGCTTGAAGTTGTTAGGAAATGCGGAC…	chr2H:257993979-258006340	Horvu_7552_2H01G305900	ATGAAGGAGAGGAGTTCTTTATGTGATAGTGCAGCAGATGGAAATTGGGTTTCAAAATACAAAAGAAAGCGAAGCAAGTTAACAGCTAGCTCGTCAAATGAGCATGAGGCTACATCACCAACATCGGGCTCTCTAATGAACAATGGTTCCATAAAAAAGAGGTCCAAGCATGACACTAGCATTTCTACATCAGCCAAGAAGATAAGAGGACATGATGGGTATTTCTATGAGTGTGTAGAATGTGACCTTGGTGGCAATTTGTTGTGTTGCGATAGCTGTCCACGGACATACCACTTGGAATGTCTTAATCCTCCCCTTAAGCGTGCACCGCCTGGGAACTGGCAATGCCCAAGATGTTGTACGAAACAAGTTAGCTTGAAGTTGTTAGGAAATGCGGAC…	chr2H:234102052-234114602	Horvu_8148_2H01G309000	ATGAAGGAGAGGAGTTCTTTATGTGATAGTGCAGCAGATGGAAATTGGGTTTCAAAATACAAAAGAAAGCGAAGCAAGTTAACAGCTAGCTCGTCAAATGAGCATGAGGCTACATCACCAACATCGGGCTCTCTAATGAACAATGGTTCCATAAAAAAGAGGTCCAAGCATGACACTAGCATTTCTACATCAGCCAAGAAGATAAGAGGACATGATGGGTATTTCTATGAGTGTGTAGAATGTGACCTTGGTGGCAATTTGTTGTGTTGCGATAGCTGTCCACGGACATACCACTTGGAATGTCTTAATCCTCCCCTTAAGCGTGCACCGCCTGGGAACTGGCAATGCCCAAGATGTTGTACGAAACAAGTTAGCTTGAAGTTGTTAGGAAATGCGGAC…	chr2H:240689468-240702060	Horvu_9043_2H01G311200	ATGAAGGAGAGGAGTTCTTTATGTGATAGTGCAGCAGATGGAAATTGGGTTTCCAAATACAAAAGAAAGCGAAGCAAGTTAACAGCTAGCTCGTCAAATGAGCATGAGGCTACATCACCAACATCGGGCTCTCTAATGAACAATGGTTCCATAAAAAAGAGGTCCAAGCATGACACTAGCATTTCTACATCAGCCAAGAAGATAAGAGGACATGATGGGTATTTCTATGAGTGTGTAGAATGTGACCTTGGTGGCAATTTGTTGTGTTGCGATAGCTGTCCACGGACATACCACTTGGAATGTCTTAATCCTCCCCTTAAGCGTGCACCGCCTGGGAACTGGCAATGCCCAAGATGTTGTACGAAACAAGTTAGCTTGAAGTTGTTAGGAAATGCGGAC…	chr2H:246156464-246169386	Horvu_IGRI_2H01G307900	ATGAAGGAGAGGAGTTCTTTATGTGATAGTGCAGCAGATGGAAATTGGGTTTCAAAATACAAAAGAAAGCGAAGCAAGTTAACAGCTAGCTCGTCAAATGAGCATGAGGCTACATCACCAACATCGGGCTCTCTAATGAACAATGGTTCCATAAAAAAGAGGTCCAAGCATGACACTAGCATTTCTACATCAGCCAAGAAGATAAGAGGACATGATGGGTATTTCTATGAGTGTGTAGAATGTGACCTTGGTGGCAATTTGTTGTGTTGCGATAGCTGTCCACGGACATACCACTTGGAATGTCTTAATCCTCCCCTTAAGCGTGCACCGCCTGGGAACTGGCAATGCCCAAGATGTTGTACGAAACAAGTTAGCTTGAAGTTGTTAGGAAATGCGGAC…	chr2H:238889158-238901518	Horvu_OUN333_2H01G303200	ATGAAGGAGAGGAGTTCTTTATGTGATAGTGCAGCAGATGGAAATTGGGTTTCAAAATACAAAAGAAAGCGAAGCAAGTTAACAGCTAGCTCGTCAAATGAGCATGAGGCTACATCACCAACATCGGGCTCTCTAATGAACAATGGTTCCATAAAAAAGAGGTCCAAGCATGACACTAGCATTTCTACATCAGCCAAGAAGATAAGAGGACATGATGGGTATTTCTATGAGTGTGTAGAATGTGACCTTGGTGGCAATTTGTTGTGTTGCGATAGCTGTCCACGGACATACCACTTGGAATGTCTTAATCCTCCCCTTAAGCGTGCACCGCCTGGGAACTGGCAATGCCCAAGATGTTGTACGAAACAAGTTAGCTTGAAGTTGTTAGGAAATGCGGAC…	chr2H:250810039-250822872
Swr1-like	Swr1	HORVU.MOREX.r3.7HG0748860	ATGGCATCAAAAGGTGGTCCCCGCTCGAAGCTAGATCATGAGACAAGACCTAGACGCAAGAAGGCTCTTGAAGCTCCAAGGGAGCCTCGGAAGCCAAAAGTTCACTGGGACCATGTTCTGGGGGAAATGGTTTGGCTATCAAAGGAGTTTGAATCTGAGAGAAAGTGGAAGTTGTCCATGGCTAAAAAGATTGCTCAAAGGGCCAATATGGGTGTAGTTGACCAAGCAACAAAGGATGAGAAAAAACAGAAGGAGGGGGAACATCGCATGAGAAAAGTTGCCCTAAATATTTCTAAGGATGTGAAGAAGTTCTGGACCAAAATAGAGAAGTTGGTTCTCTACAAGAATCAACTAGAGGTTGAGGAAAGGAAGAAAAAGGCCCTTGATAAGCAGCTTGAT…	chr7:622184098-622197058	Horvu_AKASHIN_7H01G681100	ATGGCATCAAAAGGTGGTCCCCGCTCGAAGCTAGATCATGAGACAAGACCTAGACGCAAGAAGGCTCTTGAAGCTCCAAGGGAGCCTCGGAAGCCAAAAGTTCACTGGGACCATGTTCTGGGGGAAATGGTTTGGCTGTCAAAGGAGTTTGAATCTGAGAGAAAGTGGAAGTTGTCCATGGCTAAAAAGATTGCTCAAAGGGCCAATATGGGTGTAGTTGACCAAGCAACAAAGGATGAGAAAAAACAGAAGGAGGGGGAACATCGCATGAGAAAAGTTGCCCTAAATATTTCTAAGGATGTGAAGAAGTTCTGGACCAAAATAGAGAAGTTGGTTCTCTACAAGAATCAACTAGAGGTTGAGGAAAGGAAGAAAAAGGCCCTTGATAAGCAGCTTGAT…	chr7H:646201633-646215505	Horvu_BARKE_7H01G703300	ATGGCATCAAAAGGTGGTCCCCGCTCGAAGCTAGATCATGAGACAAGACCTAGACGCAAGAAGGCTCTTGAAGCTCCAAGGGAGCCTCGGAAGCCAAAAGTTCACTGGGACCATGTTCTGGGGGAAATGGTTTGGCTATCAAAGGAGTTTGAATCTGAGAGAAAGTGGAAGTTGTCCATGGCTAAAAAGATTGCTCAAAGGGCCAATATGGGTGTAGTTGACCAAGCAACAAAGGATGAGAAAAAACAGAAGGAGGGGGAACATCGCATGAGAAAAGTTGCCCTAAATATTTCTAAGGATGTGAAGAAGTTCTGGACCAAAATAGAGAAGTTGGTTCTCTACAAGAATCAACTAGAGGTTGAGGAAAGGAAGAAAAAGGCCCTTGATAAGCAGCTTGAT…	chr7H:607716470-607729534	Horvu_GOLDEN_7H01G632300	ATGGCATCAAAAGGTGGTCCCCGCTCGAAGCTAGATCATGAGACAAGACCTAGACGCAAGAAGGCTCTTGAAGCTCCAAGGGAGCCTCGGAAGCCAAAAGTTCACTGGGACCATGTTCTGGGGGAAATGGTTTGGCTGTCAAAGGAGTTTGAATCTGAGAGAAAGTGGAAGTTGTCCATGGCTAAAAAGATTGCTCAAAGGGCCAATATGGGTGTAGTTGACCAAGCAACAAAGGATGAGAAAAAACAGAAGGAGGGGGAACATCGCATGAGAAAAGTTGCCCTAAATATTTCTAAGGATGTGAAGAAGTTCTGGACCAAAATAGAGAAGTTGGTTCTCTACAAGAATCAACTAGAGGTTGAGGAAAGGAAGAAAAAGGCCCTTGATAAGCAGCTTGAT…	chr7H:569839475-569852318	Horvu_HOCKETT_7H01G672700	ATGGCATCAAAAGGTGGTCCCCGCTCGAAGCTAGATCATGAGACAAGACCTAGACGCAAGAAGGCTCTTGAAGCTCCAAGGGAGCCTCGGAAGCCAAAAGTTCACTGGGACCATGTTCTGGGGGAAATGGTTTGGCTATCAAAGGAGTTTGAATCTGAGAGAAAGTGGAAGTTGTCCATGGCTAAAAAGATTGCTCAAAGGGCCAATATGGGTGTAGTTGACCAAGCAACAAAGGATGAGAAAAAACAGAAGGAGGGGGAACATCGCATGAGAAAAGTTGCCCTAAATATTTCTAAGGATGTGAAGAAGTTCTGGACCAAAATAGAGAAGTTGGTTCTCTACAAGAATCAACTAGAGGTTGAGGAAAGGAAGAAAAAGGCCCTTGATAAGCAGCTTGAT…	chr7H:610873920-610886880	Horvu_10350_7H01G697800	ATGGCATCAAAAGGTGGTCCCCGCTCGAAGCTAGATCATGAGACAAGACCTAGACGCAAGAAGGCTCTTGAAGCTCCAAGGGAGCCTCGGAAGCCAAAAGTTCACTGGGACCATGTTCTGGGGGAAATGGTTTGGCTATCAAAGGAGTTTGAATCTGAGAGAAAGTGGAAGTTGTCCATGGCTAAAAAGATTGCTCAAAGGGCCAATATGGGTGTAGTTGACCAAGCAACAAAGGATGAGAAAAAACAGAAGGAGGGGGAACATCGCATGAGAAAAGTTGCCCTAAATATTTCTAAGGATGTGAAGAAGTTCTGGACCAAAATAGAGAAGTTGGTTCTCTACAAGAATCAACTAGAGGTTGAGGAAAGGAAGAAAAAGGCCCTTGATAAGCAGCTTGAT…	chr7H:610957363-610970327	Horvu_13821_7H01G683200	ATGGCATCAAAAGGTGGTCCCCGCTCGAAGCTAGATCATGAGACAAGACCTAGACGCAAGAAGGCTCTTGAAGCTCCAAGGGAGCCTCGGAAGCCAAAAGTTCACTGGGACCATGTTCTGGGGGAAATGGTTTGGCTATCAAAGGAGTTTGAATCTGAGAGAAAGTGGAAGTTGTCCATGGCTAAAAAGATTGCTCAAAGGGCCAATATGGGTGTAGTTGACCAAGCAACAAAGGATGAGAAAAAACAGAAGGAGGGGGAACATCGCATGAGAAAAGTTGCCCTAAATATTTCTAAGGATGTGAAGAAGTTCTGGACCAAAATAGAGAAGTTGGTTCTCTACAAGAATCAACTAGAGGTTGAGGAAAGGAAGAAAAAGGCCCTTGATAAGCAGCTTGAT…	chr7H:635014293-635027253	Horvu_13942_7H01G677800	ATGGCATCAAAAGGTGGTCCCCGCTCGAAGCTAGATCATGAGACAAGACCTAGACGCAAGAAGGCTCTTGAAGCTCCAAGGGAGCCTCGGAAGCCAAAAGTTCACTGGGACCATGTTCTGGGGGAAATGGTTTGGCTATCAAAGGAGTTTGAATCTGAGAGAAAGTGGAAGTTGTCCATGGCTAAAAAGATTGCTCAAAGGGCCAATATGGGTGTAGTTGACCAAGCAACAAAGGATGAGAAAAAACAGAAGGAGGGGGAACATCGCATGAGAAAAGTTGCCCTAAATATTTCTAAGGATGTGAAGAAGTTCTGGACCAAAATAGAGAAGTTGGTTCTCTACAAGAATCAACTAGAGGTTGAGGAAAGGAAGAAAAAGGCCCTTGATAAGCAGCTTGAT…	chr7H:623518963-623531923	Horvu_21599_7H01G686800	ATGGCATCAAAAGGTGGTCCCCGCTCGAAGCTAGATCATGAGACAAGACCTAGACGCAAGAAGGCTCTTGAAGCTCCAAGGGAGCCTCGGAAGCCAAAAGTTCACTGGGACCATGTTCTGGGGGAAATGGTTTGGCTATCAAAGGAGTTTGAATCTGAGAGAAAGTGGAAGTTGTCCATGGCTAAAAAGATTGCTCAAAGGGCCAATATGGGTGTAGTTGACCAAGCAACAAAGGATGAGAAAAAACAGAAGGAGGGGGAACATCGCATGAGAAAAGTTGCCCTAAATATTTCTAAGGATGTGAAGAAGTTCTGGACCAAAATAGAGAAGTTGGTTCTCTACAAGAATCAACTAGAGGTTGAGGAAAGGAAGAAAAAGGCCCTTGATAAGCAGCTTGAT…	chr7H:648101797-648114760	Horvu_3081_7H01G690900	ATGGCATCAAAAGGTGGTCCCCGCTCGAAGCTAGATCATGAGACAAGACCTAGACGCAAGAAGGCTCTTGAAGCTCCAAGGGAGCCTCGGAAGCCAAAAGTTCACTGGGACCATGTTCTGGGGGAAATGGTTTGGCTATCAAAGGAGTTTGAATCTGAGAGAAAGTGGAAGTTGTCCATGGCTAAAAAGATTGCTCAAAGGGCCAATATGGGTGTAGTTGACCAAGCAACAAAGGATGAGAAAAAACAGAAGGAGGGGGAACATCGCATGAGAAAAGTTGCCCTAAATATTTCTAAGGATGTGAAGAAGTTCTGGACCAAAATAGAGAAGTTGGTTCTCTACAAGAATCAACTAGAGGTTGAGGAAAGGAAGAAAAAGGCCCTTGATAAGCAGCTTGAT…	chr7H:623299036-623311996	Horvu_HHOR_7H01G684300	ATGGCATCAAAAGGTGGTCCCCGCTCGAAGCTAGATCATGAGACAAGACCTAGACGCAAGAAGGCTCTTGAAGCTCCAAGGGAGCCTCGGAAGCCAAAAGTTCACTGGGACCATGTTCTGGGGGAAATGGTTTGGCTATCAAAGGAGTTTGAATCTGAGAGAAAGTGGAAGTTGTCCATGGCTAAAAAGATTGCTCAAAGGGCCAATATGGGTGTAGTTGACCAAGCAACAAAGGATGAGAAAAAACAGAAGGAGGGGGAACATCGCATGAGAAAAGTTGCCCTAAATATTTCTAAGGATGTGAAGAAGTTCTGGACCAAAATAGAGAAGTTGGTTCTCTACAAGAATCAACTAGAGGTTGAGGAAAGGAAGAAAAAGGCCCTTGATAAGCAGCTTGAT…	chr7H:666987494-667000454	Horvu_7552_7H01G682200	ATGGCATCAAAAGGTGGTCCCCGCTCGAAGCTAGATCATGAGACAAGACCTAGACGCAAGAAGGCTCTTGAAGCTCCAAGGGAGCCTCGGAAGCCAAAAGTTCACTGGGACCATGTTCTGGGGGAAATGGTTTGGCTATCAAAGGAGTTTGAATCTGAGAGAAAGTGGAAGTTGTCCATGGCTAAAAAGATTGCTCAAAGGGCCAATATGGGTGTAGTTGACCAAGCAACAAAGGATGAGAAAAAACAGAAGGAGGGGGAACATCGCATGAGAAAAGTTGCCCTAAATATTTCTAAGGATGTGAAGAAGTTCTGGACCAAAATAGAGAAGTTGGTTCTCTACAAGAATCAACTAGAGGTTGAGGAAAGGAAGAAAAAGGCCCTTGATAAGCAGCTTGAT…	chr7H:627512575-627525538	Horvu_8148_7H01G688000	ATGGCATCAAAAGGTGGTCCCCGCTCGAAGCTAGATCATGAGACAAGACCTAGACGCAAGAAGGCTCTTGAAGCTCCAAGGGAGCCTCGGAAGCCAAAAGTTCACTGGGACCATGTTCTGGGGGAAATGGTTTGGCTATCAAAGGAGTTTGAATCTGAGAGAAAGTGGAAGTTGTCCATGGCTAAAAAGATTGCTCAAAGGGCCAATATGGGTGTAGTTGACCAAGCAACAAAGGATGAGAAAAAACAGAAGGAGGGGGAACATCGCATGAGAAAAGTTGCCCTAAATATTTCTAAGGATGTGAAGAAGTTCTGGACCAAAATAGAGAAGTTGGTTCTCTACAAGAATCAACTAGAGGTTGAGGAAAGGAAGAAAAAGGCCCTTGATAAGCAGCTTGAT…	chr7H:622582870-622596127	Horvu_9043_7H01G686500	ATGGCATCAAAAGGTGGTCCCCGCTCGAAGCTAGATCATGAGACAAGACCTAGACGCAAGAAGGCTCTTGAAGCTCCAAGGGAGCCTCGGAAGCCAAAAGTTCACTGGGACCATGTTCTGGGGGAAATGGTTTGGCTATCAAAGGAGTTTGAATCTGAGAGAAAGTGGAAGTTGTCCATGGCTAAAAAGATTGCTCAAAGGGCCAATATGGGTGTAGTTGACCAAGCAACAAAGGATGAGAAAAAACAGAAGGAGGGGGAACATCGCATGAGAAAAGTTGCCCTAAATATTTCTAAGGATGTGAAGAAGTTCTGGACCAAAATAGAGAAGTTGGTTCTCTACAAGAATCAACTAGAGGTTGAGGAAAGGAAGAAAAAGGCCCTTGATAAGCAGCTTGAT…	chr7H:632462773-632475733	Horvu_IGRI_7H01G683400	ATGGCATCAAAAGGTGGTCCCCGCTCGAAGCTAGATCATGAGACAAGACCTAGACGCAAGAAGGCTCTTGAAGCTCCAAGGGAGCCTCGGAAGCCAAAAGTTCACTGGGACCATGTTCTGGGGGAAATGGTTTGGCTATCAAAGGAGTTTGAATCTGAGAGAAAGTGGAAGTTGTCCATGGCTAAAAAGATTGCTCAAAGGGCCAATATGGGTGTAGTTGACCAAGCAACAAAGGATGAGAAAAAACAGAAGGAGGGGGAACATCGCATGAGAAAAGTTGCCCTAAATATTTCTAAGGATGTGAAGAAGTTCTGGACCAAAATAGAGAAGTTGGTTCTCTACAAGAATCAACTAGAGGTTGAGGAAAGGAAGAAAAAGGCCCTTGATAAGCAGCTTGAT…	chr7H:618963461-618976421	Horvu_OUN333_7H01G694700	ATGGCATCAAAAGGTGGTCCCCGCTCGAAGCTAGATCATGAGACAAGACCTAGACGCAAGAAGGCTCTTGAAGCTCCAAGGGAGCCTCGGAAGCCAAAAGTTCACTGGGACCATGTTCTGGGGGAAATGGTTTGGCTATCAAAGGAGTTTGAATCTGAGAGAAAGTGGAAGTTGTCCATGGCTAAAAAGATTGCTCAAAGGGCCAATATGGGTGTAGTTGACCAAGCAACAAAGGATGAGAAAAAACAGAAGGAGGGGGAACATCGCATGAGAAAAGTTGCCCTAAATATTTCTAAGGATGTGAAGAAGTTCTGGACCAAAATAGAGAAGTTGGTTCTCTACAAGAATCAACTAGAGGTTGAGGAAAGGAAGAAAAAGGCCCTTGATAAGCAGCTTGAT…	chr7H:650193228-650206188
	Ino80	HORVU.MOREX.r3.4HG0375120	ATGGACCCGCGCCGCCCTTCCCCGCGCGGCGTCGCCAACGGCAGCGGCTTCTCCTACTCCAATCTCTTCAACCTCGAGCCATTGCTAAACTTTAAGGTCCCTTTACCGGAAGATCTTGATCGCTATGGGAATAGTAGCCCAAATGGGAGCGTGAGTAGCCAAGGTCAAGAGTCCTTGTCGGATCAGTACAATGGTGTGAGTGATGCTTCTCATGGGCTGCATCGAAAGCGAAAAAGGCATCTTGGTGTTGCGAGCGATGATGAGGAAGCAGATGCCCACAGTAACCAAATAACTGAGGAGTACTACCGTACAATGCTGAGTGAACATGTTCAAAAGTACAGAAGGTCAAAGGTTAATGAGGGTGTTTTTGGTTCTGATCCTCCTCGGGCAGACACCCCC…	chr4:356531917-356544388	Horvu_AKASHIN_4H01G241100	ATGGACCCGCGCCGCCCTTCCCCGCGCGGCGTCGCCAACGGCAGCGGCTTCTCCTACTCCAATCTCTTCAACCTCGAGCCATTGCTAAACTTTAAGGTCCCTTTACCGGAAGATCTTGATCGCTATGGGAATAGTAGCCCAAATGGGAGCGTGAGTAGCCAAGGTCAAGAGTCCTTGTCGGATCAGTACAATGGTGTGAGTGATGCTTCTCATGGGCTGCATCGAAAGCGAAAAAGGCATCTTGGTGTTGCGAGCGATGATGAGGAAGCAGATGCCCACAGTAACCAAATAACTGAGGAGTACTACCGTACAATGCTGAGTGAACATGTTCAAAAGTACAGAAGGTCAAAGGTTAATGAGGGTGTTTTTGGTTCTGATCCTCCTCGGGCAGACACCCCC…	chr4H:379176082-379188115	Horvu_BARKE_4H01G245000	ATGGACCCGCGCCGCCCTTCCCCGCGCGGCGTCGCCAACGGCAGCGGCTTCTCCTACTCCAATCTCTTCAACCTCGAGCCATTGCTAAACTTTAAGGTCCCTTTACCGGAAGATCTTGATCGCTATGGGAATAGTAGCCCAAATGGGAGCGTGAGTAGCCAAGGTCAAGAGTCCTTGTCGGATCAGTACAATGGTGTGAGTGATGCTTCTCATGGGCTGCATCGAAAGCGAAAAAGGCATCTTGGTGTTGCGAGCGATGATGAGGAAGCAGATGCCCACAGTAACCAAATAACTGAGGAGTACTACCGTACAATGCTGAGTGAACATGTTCAAAAGTACAGAAGGTCAAAGGTTAATGAGGGTGTTTTTGGTTCTGATCCTCCTCGGGCAGACACCCCC…	chr4H:351374287-351386320	Horvu_GOLDEN_4H01G226300	ATGGACCCGCGCCGCCCTTCCCCGCGCGGCGTCGCCAACGGCAGCGGCTTCTCCTACTCCAATCTCTTCAACCTCGAGCCATTGCTAAACTTTAAGGTCCCTTTACCGGAAGATCTTGATCGCTATGGGAATAGTAGCCCAAATGGGAGCGTGAGTAGCCAAGGTCAAGAGTCCTTGTCGGATCAGTACAATGGTGTGAGTGATGCTTCTCATGGGCTGCATCGAAAGCGAAAAAGGCATCTTGGTGTTGCGAGCGATGATGAGGAAGCAGATGCCCACAGTAACCAAATAACTGAGGAGTACTACCGTACAATGCTGAGTGAACATGTTCAAAAGTACAGAAGGTCAAAGGTTAATGAGGGTGTTTTTGGTTCTGATCCTCCTCGGGCAGACACCCCC…	chr4H:336673673-336685706	Horvu_HOCKETT_4H01G232200	ATGGACCCGCGCCGCCCTTCCCCGCGCGGCGTCGCCAACGGCAGCGGCTTCTCCTACTCCAATCTCTTCAACCTCGAGCCATTGCTAAACTTTAAGGTCCCTTTACCGGAAGATCTTGATCGCTATGGGAATAGTAGCCCAAATGGGAGCGTGAGTAGCCAAGGTCAAGAGTCCTTGTCGGATCAGTACAATGGTGTGAGTGATGCTTCTCATGGGCTGCATCGAAAGCGAAAAAGGCATCTTGGTGTTGCGAGCGATGATGAGGAAGCAGATGCCCACAGTAACCAAATAACTGAGGAGTACTACCGTACAATGCTGAGTGAACATGTTCAAAAGTACAGAAGGTCAAAGGTTAATGAGGGTGTTTTTGGTTCTGATCCTCCTCGGGCAGACACCCCC…	chr4H:348965922-348977955	Horvu_10350_4H01G246200	ATGGACCCGCGCCGCCCTTCCCCGCGCGGCGTCGCCAACGGCAGCGGCTTCTCCTACTCCAATCTCTTCAACCTCGAGCCATTGCTAAACTTTAAGGTCCCTTTACCGGAAGATCTTGATCGCTATGGGAATAGTAGCCCAAATGGGAGCGTGAGTAGCCAAGGTCAAGAGTCCTTGTCGGATCAGTACAATGGTGTGAGTGATGCTTCTCATGGGCTGCATCGAAAGCGAAAAAGGCATCTTGGTGTTGCGAGCGATGATGAGGAAGCAGATGCCCACAGTAACCAAATAACTGAGGAGTACTACCGTACAATGCTGAGTGAACATGTTCAAAAGTACAGAAGGTCAAAGGTTAATGAGGGTGTTTTTGGTTCTGATCCTCCTCGGGCAGACACCCCC…	chr4H:355413655-355425688	Horvu_13821_4H01G244600	ATGGACCCGCGCCGCCCTTCCCCGCGCGGCGTCGCCAACGGCAGCGGCTTCTCCTACTCCAATCTCTTCAACCTCGAGCCATTGCTAAACTTTAAGGTCCCTTTACCGGAAGATCTTGATCGCTATGGGAATAGTAGCCCAAATGGGAGCGTGAGTAGCCAAGGTCAAGAGTCCTTGTCGGATCAGTACAATGGTGTGAGTGATGCTTCTCATGGGCTGCATCGAAAGCGAAAAAGGCATCTTGGTGTTGCGAGCGATGATGAGGAAGCAGATGCCCACAGTAACCAAATAACTGAGGAGTACTACCGTACAATGCTGAGTGAACATGTTCAAAAGTACAGAAGGTCAAAGGTTAATGAGGGTGTTTTTGGTTCTGATCCTCCTCGGGCAGACACCCCC…	chr4H:373062926-373074959	Horvu_13942_4H01G247200	ATGGACCCGCGCCGCCCTTCCCCGCGCGGCGTCGCCAACGGCAGCGGCTTCTCCTACTCCAATCTCTTCAACCTCGAGCCATTGCTAAACTTTAAGGTCCCTTTACCGGAAGATCTTGATCGCTATGGGAATAGTAGCCCAAATGGGAGCGTGAGTAGCCAAGGTCAAGAGTCCTTGTCGGATCAGTACAATGGTGTGAGTGATGCTTCTCATGGGCTGCATCGAAAGCGAAAAAGGCATCTTGGTGTTGCGAGCGATGATGAGGAAGCAGATGCCCACAGTAACCAAATAACTGAGGAGTACTACCGTACAATGCTGAGTGAACATGTTCAAAAGTACAGAAGGTCAAAGGTTAATGAGGGTGTTTTTGGTTCTGATCCTCCTCGGGCAGACACCCCC…	chr4H:364970746-364982779	Horvu_21599_4H01G244900	ATGGACCCGCGCCGCCCTTCCCCGCGCGGCGTCGCCAACGGCAGCGGCTTCTCCTACTCCAATCTCTTCAACCTCGAGCCATTGCTAAACTTTAAGGTCCCTTTACCGGAAGATCTTGATCGCTATGGGAATAGTAGCCCAAATGGGAGCGTGAGTAGCCAAGGTCAAGAGTCCTTGTCGGATCAGTACAATGGTGTGAGTGATGCTTCTCATGGGCTGCATCGAAAGCGAAAAAGGCATCTTGGTGTTGCGAGCGATGATGAGGAAGCAGATGCCCACAGTAACCAAATAACTGAGGAGTACTACCGTACAATGCTGAGTGAACATGTTCAAAAGTACAGAAGGTCAAAGGTTAATGAGGGTGTTTTTGGTTCTGATCCTCCTCGGGCAGACACCCCC…	chr4H:374276299-374288332	Horvu_3081_4H01G241200	ATGGACCCGCGCCGCCCTTCCCCGCGCGGCGTCGCCAACGGCAGCGGCTTCTCCTACTCCAATCTCTTCAACCTCGAGCCATTGCTAAACTTTAAGGTCCCTTTACCGGAAGATCTTGATCGCTATGGGAATAGTAGCCCAAATGGGAGCGTGAGTAGCCAAGGTCAAGAGTCCTTGTCGGATCAGTACAATGGTGTGAGTGATGCTTCTCATGGGCTGCATCGAAAGCGAAAAAGGCATCTTGGTGTTGCGAGCGATGATGAGGAAGCAGATGCCCACAGTAACCAAATAACTGAGGAGTACTACCGTACAATGCTGAGTGAACATGTTCAAAAGTACAGAAGGTCAAAGGTTAATGAGGGTGTTTTTGGTTCTGATCCTCCTCGGGCAGACACCCCC…	chr4H:364738168-364750201	Horvu_HHOR_4H01G246900	ATGGACCCGCGCCGCCCTTCCCCGCGCGGCGTCGCCAACGGCAGCGGCTTCTCCTACTCCAATCTCTTCAACCTCGAGCCATTGCTAAACTTTAAGGTCCCTTTACCGGAAGATCTTGATCGCTATGGGAATAGTAGCCCAAATGGGAGCGTGAGTAGCCAAGGTCAAGAGTCCTTGTCGGATCAGTACAATGGTGTGAGTGATGCTTCTCATGGGCTGCATCGAAAGCGAAAAAGGCATCTTGGTGTTGCGAGCGATGATGAGGAAGCAGATGCCCACAGTAACCAAATAACTGAGGAGTACTACCGTACAATGCTGAGTGAACATGTTCAAAAGTACAGAAGGTCAAAGGTTAATGAGGGTGTTTTTGGTTCTGATCCTCCTCGGGCAGACACCCCC…	chr4H:387777656-387789689	Horvu_7552_4H01G241200	ATGGACCCGCGCCGCCCTTCCCCGCGCGGCGTCGCCAACGGCAGCGGCTTCTCCTACTCCAATCTCTTCAACCTCGAGCCATTGCTAAACTTTAAGGTCCCTTTACCGGAAGATCTTGATCGCTATGGGAATAGTAGCCCAAATGGGAGCGTGAGTAGCCAAGGTCAAGAGTCCTTGTCGGATCAGTACAATGGTGTGAGTGATGCTTCTCATGGGCTGCATCGAAAGCGAAAAAGGCATCTTGGTGTTGCGAGCGATGATGAGGAAGCAGATGCCCACAGTAACCAAATAACTGAGGAGTACTACCGTACAATGCTGAGTGAACATGTTCAAAAGTACAGAAGGTCAAAGGTTAATGAGGGTGTTTTTGGTTCTGATCCTCCTCGGGCAGACACCCCC…	chr4H:364293780-364305813	Horvu_8148_4H01G244400	ATGGACCCGCGCCGCCCTTCCCCGCGCGGCGTCGCCAACGGCAGCGGCTTCTCCTACTCCAATCTCTTCAACCTCGAGCCATTGCTAAACTTTAAGGTCCCTTTACCGGAAGATCTTGATCGCTATGGGAATAGTAGCCCAAATGGGAGCGTGAGTAGCCAAGGTCAAGAGTCCTTGTCGGATCAGTACAATGGTGTGAGTGATGCTTCTCATGGGCTGCATCGAAAGCGAAAAAGGCATCTTGGTGTTGCGAGCGATGATGAGGAAGCAGATGCCCACAGTAACCAAATAACTGAGGAGTACTACCGTACAATGCTGAGTGAACATGTTCAAAAGTACAGAAGGTCAAAGGTTAATGAGGGTGTTTTTGGTTCTGATCCTCCTCGGGCAGACACCCCC…	chr4H:365662643-365674676	Horvu_9043_4H01G240800	ATGGACCCGCGCCGCCCTTCCCCGCGCGGCGTCGCCAACGGCAGCGGCTTCTCCTACTCCAATCTCTTCAACCTCGAGCCATTGCTAAACTTTAAGGTCCCTTTACCGGAAGATCTTGATCGCTATGGGAATAGTAGCCCAAATGGGAGCGTGAGTAGCCAAGGTCAAGAGTCCTTGTCGGATCAGTACAATGGTGTGAGTGATGCTTCTCATGGGCTGCATCGAAAGCGAAAAAGGCATCTTGGTGTTGCGAGCGATGATGAGGAAGCAGATGCCCACAGTAACCAAATAACTGAGGAGTACTACCGTACAATGCTGAGTGAACATGTTCAAAAGTACAGAAGGTCAAAGGTTAATGAGGGTGTTTTTGGTTCTGATCCTCCTCGGGCAGACACCCCC…	chr4H:368149505-368161538	Horvu_IGRI_4H01G244000	ATGGACCCGCGCCGCCCTTCCCCGCGCGGCGTCGCCAACGGCAGCGGCTTCTCCTACTCCAATCTCTTCAACCTCGAGCCATTGCTAAACTTTAAGGTCCCTTTACCGGAAGATCTTGATCGCTATGGGAATAGTAGCCCAAATGGGAGCGTGAGTAGCCAAGGTCAAGAGTCCTTGTCGGATCAGTACAATGGTGTGAGTGATGCTTCTCATGGGCTGCATCGAAAGCGAAAAAGGCATCTTGGTGTTGCGAGCGATGATGAGGAAGCAGATGCCCACAGTAACCAAATAACTGAGGAGTACTACCGTACAATGCTGAGTGAACATGTTCAAAAGTACAGAAGGTCAAAGGTTAATGAGGGTGTTTTTGGTTCTGATCCTCCTCGGGCAGACACCCCC…	chr4H:363890356-363902389	Horvu_OUN333_4H01G245900	ATGGACCCGCGCCGCCCTTCCCCGCGCGGCGTCGCCAACGGCAGCGGCTTCTCCTACTCCAATCTCTTCAACCTCGAGCCATTGCTAAACTTTAAGGTCCCTTTACCGGAAGATCTTGATCGCTATGGGAATAGTAGCCCAAATGGGAGCGTGAGTAGCCAAGGTCAAGAGTCCTTGTCGGATCAGTACAATGGTGTGAGTGATGCTTCTCATGGGCTGCATCGAAAGCGAAAAAGGCATCTTGGTGTTGCGAGCGATGATGAGGAAGCAGATGCCCACAGTAACCAAATAACTGAGGAGTACTACCGTACAATGCTGAGTGAACATGTTCAAAAGTACAGAAGGTCAAAGGTTAATGAGGGTGTTTTTGGTTCTGATCCTCCTCGGGCAGACACCCCC…	chr4H:377752015-377764048
	Etl1	HORVU.MOREX.r3.2HG0187800	ATGCGGCGGGACTTCGAGGAGATCTCCGACGAGGAGTGGTCGAACCACAACTTCAAGCCCTCCCGGGTCCTCAAGCGCCCCCACCGGAGCCCCCAGCAGCCGGCCGGGCGGCCTCCCCCTCCCATCGATTCGTTCCGCTACGATCCCAAGCCTTCCTCCGCTGTCGGCACCAGCAACGGCACCACCGTCGTCCTCTCCGACGACGACGACTTCGACCTGGGGAAAGGCGCCAAGGCGCGCCGCGCCGAGAATAGCTCGCGCGTGCTCAAGCGCCCCCAGCACAAAAGCCCGCCTAGGCGGGCCACGGCGTCCACCCAATCCTCCCGGCACAACAATAAACCCCCCAAGGCCGCCATCCCGGTGGCGCTCTCCGACGAGGACTTCGACCCCGAAGACGAG…	chr2:588636228-588643061	Horvu_AKASHIN_2H01G556500	ATGCGGCGGGACTTCGAGGAGATCTCCGACGAGGAGTGGTCGAACCACAACTTCAAGCCCTCCCGGGTCCTCAAGCGCCCCCACCGGAGCCCCCAGCAGCCGGCCGGGCGGCCTCCCCCTCCCATCGATTCGTTCCGCTACGATCCCAAGCCTTCCTCCGCTGTCGGCACCAGCAACGGCACCACCGTCGTCCTCTCCGACGACGACGACTTCGACCTGGGGAAAGGCGCCAAGGCGCGCCGCGCCGAGAATAGCTCGCGCGTGCTCAAGCGCCCCCAGCACAAAAGCCCGCCTAGGCGGGCCACGGCGTCCACCCAATCCTCCCGGCACAACAATAAACCCCCCAAGGCCGCCATCCCGGTGGCGCTCTCCGACGAGGACTTCGACCCCGAAGACGAG…	chr2H:615284198-615290622	Horvu_BARKE_2H01G564700	ATGCGGCGGGACTTCGAGGAGATCTCCGACGAGGAGTGGTCGAACCACAACTTCAAGCCCTCCCGGGTCCTCAAGCGCCCCCACCGGAGCCCCCAGCAGCCGGCCGGGCGGCCTCCCCCTCCCATCGATTCGTTCCGCTACGATCCCAAGCCTTCCTCCGCTGTCGGCACCAGCAACGGCACCACCGTCGTCCTCTCCGACGACGACGACTTCGACCTGGGGAAAGGCGCCAAGGCGCGCCGCGCCGAGAATAGCTCGCGCGTGCTCAAGCGCCCCCAGCACAAAAGCCCGCCTAGGCGGGCCACGGCGTCCACCCAATCCTCCCGGCACAACAATAAACCCCCCAAGGCCGCCATCCCGGTGGCGCTCTCCGACGAGGACTTCGACCCCGAAGACGAG…	chr2H:577332657-577339081	Horvu_GOLDEN_2H01G515000	ATGCGGCGGGACTTCGAGGAGATCTCCGACGAGGAGTGGTCGAACCACAACTTCAAGCCCTCCCGGGTCCTCAAGCGCCCCCACCGGAGCCCCCAGCAGCCGGCCGGGCGGCCTCCCCCTCCCATCGATTCGTTCCGCTACGATCCCAAGCCTTCCTCCGCTGTCGGCACCAGCAACGGCACCACCGTCGTCCTCTCCGACGACGACGACTTCGACCTGGGGAAAGGCGCCAAGGCGCGCCGCGCCGAGAATAGCTCGCGCGTGCTCAAGCGCCCCCAGCACAAAAGCCCGCCTAGGCGGGCCACGGCGTCCACCCAATCCTCCCGGCACAACAATAAACCCCCCAAGGCCGCCATCCCGGTGGCGCTCTCCGACGAGGACTTCGACCCCGAAGACGAG…	chr2H:546440447-546446871	Horvu_HOCKETT_2H01G529400	ATGCGGCGGGACTTCGAGGAGATCTCCGACGAGGAGTGGTCGAACCACAACTTCAAGCCCTCCCGGGTCCTCAAGCGCCCCCACCGGAGCCCCCAGCAGCCGGCCGGGCGGCCTCCCCCTCCCATCGATTCGTTCCGCTACGATCCCAAGCCTTCCTCCGCTGTCGGCACCAGCAACGGCACCACCGTCGTCCTCTCCGACGACGACGACTTCGACCTGGGGAAAGGCGCCAAGGCGCGCCGCGCCGAGAATAGCTCGCGCGTGCTCAAGCGCCCCCAGCACAAAAGCCCGCCTAGGCGGGCCACGGCGTCCACCCAATCCTCCCGGCACAACAATAAACCCCCCAAGGCCGCCATCCCGGTGGCGCTCTCCGACGAGGACTTCGACCCCGAAGACGAG…	chr2H:569462619-569469103	Horvu_10350_2H01G560800	ATGCGGCGGGACTTCGAGGAGATCTCCGACGAGGAGTGGTCGAACCACAACTTCAAGCCCTCCCGGGTCCTCAAGCGCCCCCACCGGAGCCCCCAGCAGCCGGCCGGGCGGCCTCCCCCTCCCATCGATTCGTTCCGCTACGATCCCAAGCCTTCCTCCGCTGTCGGCACCAGCAACGGCACCACCGTCGTCCTCTCCGACGACGACGACTTCGACCTGGGGAAAGGCGCCAAGGCGCGCCGCGCCGAGAATAGCTCGCGCGTGCTCAAGCGCCCCCAGCACAAAAGCCCGCCTAGGCGGGCCACGGCGTCCACCCAATCCTCCCGGCACAACAATAAACCCCCCAAGGCCGCCATCCCGGTGGCGCTCTCCGACGAGGACTTCGACCCCGAAGACGAG…	chr2H:577182749-577189233	Horvu_13821_2H01G556200	ATGCGGCGGGACTTCGAGGAGATCTCCGACGAGGAGTGGTCGAACCACAACTTCAAGCCCTCCCGGGTCCTCAAGCGCCCCCACCGGAGCCCCCAGCAGCCGGCCGGGCGGCCTCCCCCTCCCATCGATTCGTTCCGCTACGATCCCAAGCCTTCCTCCGCTGTCGGCACCAGCAACGGCACCACCGTCGTCCTCTCCGACGACGACGACTTCGACCTGGGGAAAGGCGCCAAGGCGCGCCGCGCCGAGAATAGCTCGCGCGTGCTCAAGCGCCCCCAGCACAAAAGCCCGCCTAGGCGGGCCACGGCGTCCACCCAATCCTCCCGGCACAACAATAAACCCCCCAAGGCCGCCATCCCGGTGGCGCTCTCCGACGAGGACTTCGACCCCGAAGACGAG…	chr2H:606020027-606026451	Horvu_13942_2H01G556200	ATGCGGCGGGACTTCGAGGAGATCTCCGACGAGGAGTGGTCGAACCACAACTTCAAGCCCTCCCGGGTCCTCAAGCGCCCCCACCGGAGCCCCCAGCAGCCGGCCGGGCGGCCTCCCCCTCCCATCGATTCGTTCCGCTACGATCCCAAGCCTTCCTCCGCTGTCGGCACCAGCAACGGCACCACCGTCGTCCTCTCCGACGACGACGACTTCGACCTGGGGAAAGGCGCCAAGGCGCGCCGCGCCGAGAATAGCTCGCGCGTGCTCAAGCGCCCCCAGCACAAAAGCCCGCCTAGGCGGGCCACGGCGTCCACCCAATCCTCCCGGCACAACAATAAACCCCCCAAGGCCGCCATCCCGGTGGCGCTCTCCGACGAGGACTTCGACCCCGAAGACGAG…	chr2H:593035011-593041435	Horvu_21599_2H01G554800	ATGCGGCGGGACTTCGAGGAGATCTCCGACGAGGAGTGGTCGAACCACAACTTCAAGCCCTCCCGGGTCCTCAAGCGCCCCCACCGGAGCCCCCAGCAGCCGGCCGGGCGGCCTCCCCCTCCCATCGATTCGTTCCGCTACGATCCCAAGCCTTCCTCCGCTGTCGGCACCAGCAACGGCACCACCGTCGTCCTCTCCGACGACGACGACTTCGACCTGGGGAAAGGCGCCAAGGCGCGCCGCGCCGAGAATAGCTCGCGCGTGCTCAAGCGCCCCCAGCACAAAAGCCCGCCTAGGCGGGCCACGGCGTCCACCCAATCCTCCCGGCACAACAATAAACCCCCCAAGGCCGCCATCCCGGTGGCGCTCTCCGACGAGGACTTCGACCCCGAAGACGAG…	chr2H:604679580-604686004	Horvu_3081_ 2H01G557400	N/A	chr2H:590007475-590002101	Horvu_HHOR_2H01G550200	ATGCGGCGGGACTTCGAGGAGATCTCCGACGAGGAGTGGTCGAACCACAACTTCAAGCCCTCCCGGGTCCTCAAGCGCCCCCACCGGAGCCCCCAGCAGCCGGCCGGGCGGCCTCCCCCTCCCATCGATTCGTTCCGCTACGATCCCAAGCCTTCCTCCGCTGTCGGCACCAGCAACGGCACCACCGTCGTCCTCTCCGACGACGACGACTTCGACCTGGGGAAAGGCGCCAAGGCGCGCCGCGCCGAGAATAGCTCGCGCGTGCTCAAGCGCCCCCAGCACAAAAGCCCGCCTAGGCGGGCCACGGCGTCCACCCAATCCTCCCGGCACAACAATAAACCCCCCAAGGCCGCCATCCCGGTGGCGCTCTCCGACGAGGACTTCGACCCCGAAGACGAG…	chr2H:632073965-632080389	Horvu_7552_2H01G557300	ATGCGGCGGGACTTCGAGGAGATCTCCGACGAGGAGTGGTCGAACCACAACTTCAAGCCCTCCCGGGTCCTCAAGCGCCCCCACCGGAGCCCCCAGCAGCCGGCCGGGCGGCCTCCCCCTCCCATCGATTCGTTCCGCTACGATCCCAAGCCTTCCTCCGCTGTCGGCACCAGCAACGGCACCACCGTCGTCCTCTCCGACGACGACGACTTCGACCTGGGGAAAGGCGCCAAGGCGCGCCGCGCCGAGAATAGCTCGCGCGTGCTCAAGCGCCCCCAGCACAAAAGCCCGCCTAGGCGGGCCACGGCGTCCACCCAATCCTCCCGGCACAACAATAAACCCCCCAAGGCCGCCATCCCGGTGGCGCTCTCCGACGAGGACTTCGACCCCGAAGACGAG…	chr2H:593748061-593754482	Horvu_8148_2H01G556700	ATGCGGCGGGACTTCGAGGAGATCTCCGACGAGGAGTGGTCGAACCACAACTTCAAGCCCTCCCGGGTCCTCAAGCGCCCCCACCGGAGCCCCCAGCAGCCGGCCGGGCGGCCTCCCCCTCCCATCGATTCGTTCCGCTACGATCCCAAGCCTTCCTCCGCTGTCGGCACCAGCAACGGCACCACCGTCGTCCTCTCCGACGACGACGACTTCGACCTGGGGAAAGGCGCCAAGGCGCGCCGCGCCGAGAATAGCTCGCGCGTGCTCAAGCGCCCCCAGCACAAAAGCCCGCCTAGGCGGGCCACGGCGTCCACCCAATCCTCCCGGCACAACAATAAACCCCCCAAGGCCGCCATCCCGGTGGCGCTCTCCGACGAGGACTTCGACCCCGAAGACGAG…	chr2H:592420915-592427336	Horvu_9043_2H01G556700	ATGCGGCGGGACTTCGAGGAGATCTCCGACGAGGAGTGGTCGAACCACAACTTCAAGCCCTCCCGGGTCCTCAAGCGCCCCCACCGGAGCCCCCAGCAGCCGGCCGGGCGGCCTCCCCCTCCCATCGATTCGTTCCGCTACGATCCCAAGCCTTCCTCCGCTGTCGGCACCAGCAACGGCACCACCGTCGTCCTCTCCGACGACGACGACTTCGACCTGGGGAAAGGCGCCAAGGCGCGCCGCGCCGAGAATAGCTCGCGCGTGCTCAAGCGCCCCCAGCACAAAAGCCCGCCTAGGCGGGCCACGGCGTCCACCCAATCCTCCCGGCACAACAATAAACCCCCCAAGGCCGCCATCCCGGTGGCGCTCTCCGACGAGGACTTCGACCCCGAAGACGAG…	chr2H:602515089-602521573	Horvu_IGRI_2H01G556100	ATGCGGCGGGACTTCGAGGAGATCTCCGACGAGGAGTGGTCGAACCACAACTTCAAGCCCTCCCGGGTCCTCAAGCGCCCCCACCGGAGCCCCCAGCAGCCGGCCGGGCGGCCTCCCCCTCCCATCGATTCGTTCCGCTACGATCCCAAGCCTTCCTCCGCTGTCGGCACCAGCAACGGCACCACCGTCGTCCTCTCCGACGACGACGACTTCGACCTGGGGAAAGGCGCCAAGGCGCGCCGCGCCGAGAATAGCTCGCGCGTGCTCAAGCGCCCCCAGCACAAAAGCCCGCCTAGGCGGGCCACGGCGTCCACCCAATCCTCCCGGCACAACAATAAACCCCCCAAGGCCGCCATCCCGGTGGCGCTCTCCGACGAGGACTTCGACCCCGAAGACGAG…	chr2H:589352436-589358860	Horvu_OUN333_2H01G553700	ATGCGGCGGGACTTCGAGGAGATCTCCGACGAGGAGTGGTCGAACCACAACTTCAAGCCCTCCCGGGTCCTCAAGCGCCCCCACCGGAGCCCCCAGCAGCCGGCCGGGCGGCCTCCCCCTCCCATCGATTCGTTCCGCTACGATCCCAAGCCTTCCTCCGCTGTCGGCACCAGCAACGGCACCACCGTCGTCCTCTCCGACGACGACGACTTCGACCTGGGGAAAGGCGCCAAGGCGCGCCGCGCCGAGAATAGCTCGCGCGTGCTCAAGCGCCCCCAGCACAAAAGCCCGCCTAGGCGGGCCACGGCGTCCACCCAATCCTCCCGGCACAACAATAAACCCCCCAAGGCCGCCATCCCGGTGGCGCTCTCCGACGAGGACTTCGACCCCGAAGACGAG…	chr2H:613160595-613167016
Rad54-like	Rad54	HORVU.MOREX.r3.6HG0617770	ATGCCGTCGAGGAGCAAGCGCGACTGCCTCGGCAGCGATTCCGACGAGGAGGAGGAGGAGGAGGTCGTCACCCTCTCCTCCGACGAGTCGGGGTCCGAGGCGGAGCGCGGGGCGGAGGCGGCCGACGACGACGACGACGAGTACGTGGCAGACAGCAGCGACGCGGGCGGCGTCGAGGACGAGGCTGAGGAAGTGGGCGACGGCGATGACGGCGACGGCGACGGCGGGCGGCCAGTTCGAGGCGGGGGGCCAGTCCGGGGTGGGCGCCGGGGCGCTGCGGAGCCCGACGAGGAGAGGAAATCGCAGAACGTGGACGCGCTCGTCAGGGGAAACCTGGTTGTCAGAAGGCAGCCACTTATTCCACGTATCCTTTCTGTTTCTGATGCGGCAGCGATAGCT…	chr6:517870572-517885095	Horvu_AKASHIN_6H01G460300	ATGCCGTCGAGGAGCAAGCGCGACTGCCTCGGCAGCGATTCCGACGAGGAGGAGGAGGAGGAGGTCGTCACCCTCTCCTCCGACGAGTCGGGGTCCGAGGCGGAGCGCGGGGCGGAGGCGGCCGACGACGACGACGACGAGTACGTGGCAGACAGCAGCGACGCGGGCGGCGTCGAGGACGAGGCTGAGGAAGTGGGCGACGGCGATGACGGCGACGGCGACGGCGGGCGGCCAGTTCGAGGCGGGGGGCCAGTCCGGGGTGGGCGCCGGGGCGCTGCGGAGCCCGACGAGGAGAGGAAATCGCAGAACGTGGACGCGCTCGTCAGGGGAAACCTGGTTGTCAGAAGGCAGCCACTTATTCCACGTATCCTTTCAGTTTCTGATGCGGCAGCGATAGCT…	chr6H:536290520-536305146	Horvu_BARKE_6H01G479400	ATGCCGTCGAGGAGCAAGCGCGACTGCCTCGGCAGCGATTCCGACGAGGAGGAGGAGGAGGAGGTCGTCACCCTCTCCTCCGACGAGTCGGGGTCCGAGGCGGAGCGCGGGGCGGAGGCGGCCGACGACGACGACGACGAGTACGTGGCAGACAGCAGCGACGCGGGCGGCGTCGAGGACGAGGCTGAGGAAGTGGGCGACGGCGATGACGGCGACGGCGACGGCGGGCGGCCAGTTCGAGGCGGGGGGCCAGTCCGGGGTGGGCGCCGGGGCGCTGCGGAGCCCGACGAGGAGAGGAAATCGCAGAACGTGGACGCGCTCGTCAGGGGAAACCTGGTTGTCAGAAGGCAGCCACTTATTCCACGTATCCTTTCAGTTTCTGATGCGGCAGCGATAGCT…	chr6H:507444680-507459342	Horvu_GOLDEN_6H01G430900	ATGCCGTCGAGGAGCAAGCGCGACTGCCTCGGCAGCGATTCCGACGAGGAGGAGGAGGAGGAGGTCGTCACCCTCTCCTCCGACGAGTCGGGGTCCGAGGCGGAGCGCGGGGCGGAGGCGGCCGACGACGACGACGACGAGTACGTGGCAGACAGCAGCGACGCGGGCGGCGTCGAGGACGAGGCTGAGGAAGTGGGCGACGGCGATGACGGCGACGGCGACGGCAGGCGGCCAGTTCGAGGCGGGGGGCCAGTCCGGGGTGGGCGCCGGGGCGCTGCGGAGCCCGACGAGGAGAGGAAATCGCAGAACGTGGACGCGCTCGTCAGGGGAAACCTGGTTGTCAGAAGGCAGCCACTTATTCCACGTATCCTTTCAGTTTCTGATGCGGCAGCGATAGCT…	chr6H:478960682-478975343	Horvu_HOCKETT_6H01G450200	ATGCCGTCGAGGAGCAAGCGCGACTGCCTCGGCAGCGATTCCGACGAGGAGGAGGAGGAGGAGGTCGTCACCCTCTCCTCCGACGAGTCGGGGTCCGAGGCGGAGCGCGGGGCGGAGGCGGCCGACGACGACGACGACGAGTACGTGGCAGACAGCAGCGACGCGGGCGGCGTCGAGGACGAGGCTGAGGAAGTGGGCGACGGCGATGACGGCGACGGCGACGGCGGGCGGCCAGTTCGAGGCGGGGGGCCAGTCCGGGGTGGGCGCCGGGGCGCTGCGGAGCCCGACGAGGAGAGGAAATCGCAGAACGTGGACGCGCTCGTCAGGGGAAACCTGGTTGTCAGAAGGCAGCCACTTATTCCACGTATCCTTTCAGTTTCTGATGCGGCAGCGATAGCT…	chr6H:496546813-496561439	Horvu_10350_6H01G473900	ATGCCGTCGAGGAGCAAGCGCGACTGCCTCGGCAGCGATTCCGACGAGGAGGAGGAGGAGGAGGTCGTCACCCTCTCCTCCGACGAGTCGGGGTCCGAGGCGGAGCGCGGGGCGGAGGCGGCCGACGACGACGACGACGAGTACGTGGCAGACAGCAGCGACGCGGGCGGCGTCGAGGACGAGGCTGAGGAAGTGGGCGACGGCGATGACGGCGACGGCGACGGCGGGCGGCCAGTTCGAGGCGGGGGGCCAGTCCGGGGTGGGCGCCGGGGCGCTGCGGAGCCCGACGAGGAGAGGAAATCGCAGAACGTGGACGCGCTCGTCAGGGGAAACCTGGTTGTCAGAAGGCAGCCACTTATTCCACGTATCCTTTCAGTTTCTGATGCGGCAGCGATAGCT…	chr6H:510765622-510780248	Horvu_13821_6H01G463500	ATGCCGTCGAGGAGCAAGCGCGACTGCCTCGGCAGCGATTCCGACGAGGAGGAGGAGGAGGAGGTCGTCACCCTCTCCTCCGACGAGTCGGGGTCCGAGGCGGAGCGCGGGGCGGAGGCGGCCGACGACGACGACGACGAGTACGTGGCAGACAGCAGCGACGCGGGCGGCGTCGAGGACGAGGCTGAGGAAGTGGGCGACGGCGATGACGGCGACGGCGACGGCAGGCGGCCAGTTCGAGGCGGGGGGCCAGTCCGGGGTGGGCGCCGGGGCGCTGCGGAGCCCGACGAGGAGAGGAAATCGCAGAACGTGGACGCGCTCGTCAGGGGAAACCTGGTTGTCAGAAGGCAGCCACTTATTCCACGTATCCTTTCAGTTTCTGATGCGGCAGCGATAGCT…	chr6H:531572376-531586921	Horvu_13942_6H01G460200	ATGCCGTCGAGGAGCAAGCGCGACTGCCTCGGCAGCGATTCCGACGAGGAGGAGGAGGAGGAGGTCGTCACCCTCTCCTCCGACGAGTCGGGGTCCGAGGCGGAGCGCGGGGCGGAGGCGGCCGACGACGACGACGACGAGTACGTGGCAGACAGCAGCGACGCGGGCGGCGTCGAGGACGAGGCTGAGGAAGTGGGCGACGGCGATGACGGCGACGGCGACGGCGGGCGGCCAGTTCGAGGCGGGGGGCCAGTCCGGGGTGGGCGCCGGGGCGCTGCGGAGCCCGACGAGGAGAGGAAATCGCAGAACGTGGACGCGCTCGTCAGGGGAAACCTGGTTGTCAGAAGGCAGCCACTTATTCCACGTATCCTTTCTGTTTCTGATGCGGCAGCGATAGCT…	chr6H:515406554-515421075	Horvu_21599_6H01G467100	ATGCCGTCGAGGAGCAAGCGCGACTGCCTCGGCAGCGATTCCGACGAGGAGGAGGAGGAGGAGGTCGTCACCCTCTCCTCCGACGAGTCGGGGTCCGAGGCGGAGCGCGGGGCGGAGGCGGCCGACGACGACGACGACGAGTACGTGGCAGACAGCAGCGACGCGGGCGGCGTCGAGGACGAGGCTGAGGAAGTGGGCGACGGCGATGACGGCGACGGCGACGGCGGGCGGCCAGTTCGAGGCGGGGGGCCAGTCCGGGGTGGGCGCCGGGGCGCTGCGGAGCCCGACGAGGAGAGGAAATCGCAGAACGTGGACGCGCTCGTCAGGGGAAACCTGGTTGTCAGAAGGCAGCCACTTATTCCACGTATCCTTTCAGTTTCTGATGCGGCAGCGATAGCT…	chr6H:536648651-536663277	Horvu_3081_6H01G468600	ATGCCGTCGAGGAGCAAGCGCGACTGCCTCGGCAGCGATTCCGACGAGGAGGAGGAGGAGGAGGTCGTCACCCTCTCCTCCGACGAGTCGGGGTCCGAGGCGGAGCGCGGGGCGGAGGCGGCCGACGACGACGACGACGAGTACGTGGCAGACAGCAGCGACGCGGGCGGCGTCGAGGACGAGGCTGAGGAAGTGGGCGACGGCGATGACGGCGACGGCGACGGCGGGCGGCCAGTTCGAGGCGGGGGGCCAGTCCGGGGTGGGCGCCGGGGCGCTGCGGAGCCCGACGAGGAGAGGAAATCGCAGAACGTGGACGCGCTCGTCAGGGGAAACCTGGTTGTCAGAAGGCAGCCACTTATTCCACGTATCCTTTCAGTTTCTGATGCGGCAGCGATAGCT…	chr6H:518520256-518534882	Horvu_HHOR_6H01G459000	ATGCCGTCGAGGAGCAAGCGCGACTGCCTCGGCAGCGATTCCGACGAGGAGGAGGAGGAGGAGGTCGTCACCCTCTCCTCCGACGAGTCGGGGTCCGAGGCGGAGCGCGGGGCGGAGGCGGCCGACGACGACGACGACGAGTACGTGGCAGACAGCAGCGACGCGGGCGGCGTCGAGGACGAGGCTGAGGAAGTGGGCGACGGCGATGACGGCGACGGCGACGGCGGGCGGCCAGTTCGAGGCGGGGGGCCAGTCCGGGGTGGGCGCCGGGGCGCTGCGGAGCCCGACGAGGAGAGGAAATCGCAGAACGTGGACGCGCTCGTCAGGGGAAACCTGGTTGTCAGAAGGCAGCCACTTATTCCACGTATCCTTTCAGTTTCTGATGCGGCAGCGATAGCT…	chr6H:552099619-552114908	Horvu_7552_6H01G463000	ATGCCGTCGAGGAGCAAGCGCGACTGCCTCGGCAGCGATTCCGACGAGGAGGAGGAGGAGGAGGTCGTCACCCTCTCCTCCGACGAGTCGGGGTCCGAGGCGGAGCGCGGGGCGGAGGCGGCCGACGACGACGACGACGAGTACGTGGCAGACAGCAGCGACGCGGGCGGCGTCGAGGACGAGGCTGAGGAAGTGGGCGACGGCGATGACGGCGACGGCGACGGCGGGCGGCCAGTTCGAGGCGGGGGGCCAGTCCGGGGTGGGCGCCGGGGCGCTGCGGAGCCCGACGAGGAGAGGAAATCGCAGAACGTGGACGCGCTCGTCAGGGGAAACCTGGTTGTCAGAAGGCAGCCACTTATTCCACGTATCCTTTCAGTTTCTGATGCGGCAGCGATAGCT…	chr6H:518778507-518793133	Horvu_8148_6H01G475000	ATGCCGTCGAGGAGCAAGCGCGACTGCCTCGGCAGCGATTCCGACGAGGAGGAGGAGGAGGAGGTCGTCACCCTCTCCTCCGACGAGTCGGGGTCCGAGGCGGAGCGCGGGGCGGAGGCGGCCGACGACGACGACGACGAGTACGTGGCAGACAGCAGCGACGCGGGCGGCGTCGAGGACGAGGCTGAGGAAGTGGGCGACGGCGATGACGGCGACGGCGACGGCGGGCGGCCAGTTCGAGGCGGGGGGCCAGTCCGGGGTGGGCGCCGGGGCGCTGCGGAGCCCGACGAGGAGAGGAAATCGCAGAACGTGGACGCGCTCGTCAGGGGAAACCTGGTTGTCAGAAGGCAGCCACTTATTCCACGTATCCTTTCAGTTTCTGATGCGGCAGCGATAGCT…	chr6H:524747134-524761760	Horvu_9043_6H01G465900	ATGCCGTCGAGGAGCAAGCGCGACTGCCTCGGCAGCGATTCCGACGAGGAGGAGGAGGAGGAGGTCGTCACCCTCTCCTCCGACGAGTCGGGGTCCGAGGCGGAGCGCGGGGCGGAGGCGGCCGACGACGACGACGACGAGTACGTGGCAGACAGCAGCGACGCGGGCGGCGTCGAGGACGAGGCTGAGGAAGTGGGCGACGGCGATGACGGCGACGGCGACGGCGGGCGGCCAGTTCGAGGCGGGGGGCCAGTCCGGGGTGGGCGCCGGGGCGCTGCGGAGCCCGACGAGGAGAGGAAATCGCAGAACGTGGACGCGCTCGTCAGGGGAAACCTGGTTGTCAGAAGGCAGCCACTTATTCCACGTATCCTTTCAGTTTCTGATGCGGCAGCGATAGCT…	chr6H:525555958-525570584	Horvu_IGRI_6H01G466900	ATGCCGTCGAGGAGCAAGCGCGACTGCCTCGGCAGCGATTCCGACGAGGAGGAGGAGGAGGAGGTCGTCACCCTCTCCTCCGACGAGTCGGGGTCCGAGGCGGAGCGCGGGGCGGAGGCGGCCGACGACGACGACGACGAGTACGTGGCAGACAGCAGCGACGCGGGCGGCGTCGAGGACGAGGCTGAGGAAGTGGGCGACGGCGATGACGGCGACGGCGACGGCAGGCGGCCAGTTCGAGGCGGGGGGCCAGTCCGGGGTGGGCGCCGGGGCGCTGCGGAGCCCGACGAGGAGAGGAAATCGCAGAACGTGGACGCGCTCGTCAGGGGAAACCTGGTTGTCAGAAGGCAGCCACTTATTCCACGTATCCTTTCAGTTTCTGATGCGGCAGCGATAGCT…	chr6H:515323281-515337826	Horvu_OUN333_6H01G467700	ATGCCGTCGAGGAGCAAGCGCGACTGCCTCGGCAGCGATTCCGACGAGGAGGAGGAGGAGGAGGTCGTCACCCTCTCCTCCGACGAGTCGGGGTCCGAGGCGGAGCGCGGGGCGGAGGCGGCCGACGACGACGACGACGAGTACGTGGCAGACAGCAGCGACGCGGGCGGCGTCGAGGACGAGGCTGAGGAAGTGGGCGACGGCGATGACGGCGACGGCGACGGCGGGCGGCCAGTTCGAGGCGGGGGGCCAGTCCGGGGTGGGCGCCGGGGCGCTGCGGAGCCCGACGAGGAGAGGAAATCGCAGAACGTGGACGCGCTCGTCAGGGGAAACCTGGTTGTCAGAAGGCAGCCACTTATTCCACGTATCCTTTCAGTTTCTGATGCGGCAGCGATAGCT…	chr6H:541515405-541530028
	ATRX	HORVU.MOREX.r3.1HG0040050	ATGGATGTGAATGGAAAATTATCTGATGTCGATTTAAAAAAAATGGATGCTGTTCACTCGAATGGACAGCCGGTGGATGATATCCTTATTTTAGAATCTGAAGGGGATGAAAATGAACTTGTAGTAGAAACTAATACCATAGAAGGTCCATTTGAGGAGCACAAGGAACACAAATCTGAGAAAATGGATGATAGTGTGCATGAAGAAGGATCCACTAGCACTGATGATGATTCAGACAGTGACTTGTATGGATATCTCCGCGAGTCAGAGAATGAACAAACTTCAGAGTCTGATGTTGAGGAGAAAGACATCGAGGTGTCTATCCCTGAGGAGAAAGTCAAAGAATTAGTTGCCGAATTCCATGACGTTGAGAGCAAAGCTGCTGAGGCGCAAGAATCA…	chr1:253479457-253498390	Horvu_AKASHIN_1H01G227300	ATGGATGTGAATGGAAAATTATCTGATGTCGATTTAAAAAAAATGGATGCTGTTCACTCGAATGGACAGCCGGTGGATGATATCCTTATTTTAGAATCTGAAGGGGATGAAAATGAACTTGTAGTAGAAACTAATACCATAGAAGGTCCATTTGAGGAGCACAAGGAACACAAATCTGAGAAAATGGATGATAGTGTGCATGAAGAAGGATCCACTAGCACTGATGATGATTCAGACAGTGACTTGTATGGATATCTCCGCGAGTCAGAGAATGAACAAACTTCAGAGTCTGATGTTGAGGAGAAAGACATCGAGGTGTCTATCCCTGAGGAGAAAGTCAAAGAATTAGTTGCCGAATTCCATGACGTTGAGAGCAAAGCTGCTGAGGCGCAAGAATCA…	chr1H:262461468-262480205	Horvu_BARKE_1H01G244200	ATGGATGTGAATGGAAAATTATCTGATGTCGATTTAAAAAAAATGGATGCTGTTCACTCGAATGGACAGCCGGTGGATGATATCCTTATTTTAGAATCTGAAGGGGATGAAAATGAACTTGTAGTAGAAACTAATACCATAGAAGGTCCATTTGAGGAGCACAAGGAACACAAATCTGAGAAAATGGATGATAGTGTGCATGAAGAAGGATCCACTAGCACTGATGATGATTCAGACAGTGACTTGTATGGATATCTCCGCGAGTCAGAGAATGAACAAACTTCAGAGTCTGATGTTGAGGAGAAAGACATCGAGGTGTCTATCCCTGAGGAGAAAGTCAAAGAATTAGTTGCCGAATTCCATGACGTTGAGAGCAAAGCTGCTGAGGCGCAAGAATCA…	chr1H:253733662-253752399	Horvu_GOLDEN_1H01G193000	ATGGATGTGAATGGAAAATTATCTGATGTCGATTTAAAAAAAATGGATGCTGTTCACTCGAATGGACAGCCGGTGGATGATATCCTTATTTTAGAATCTGAAGGGGATGAAAATGAACTTGTAGTAGAAACTAATACCATAGAAGGTCCATTTGAGGAGCACAAGGAACACAAATCTGAGAAAATGGATGATAGTGTGCATGAAGAAGGATCCACTAGCACTGATGATGATTCAGACAGTGACTTGTATGGATATCTCCGCGAGTCAGAGAATGAACAAACTTCAGAGTCTGATGTTGAGGAGAAAGACATCGAGGTGTCTATCCCTGAGGAGAAAGTCAAAGAATTAGTTGCCGAATTCCATGACGTTGAGAGCAAAGCTGCTGAGGCGCAAGAATCA…	chr1H:231517378-231536115	Horvu_HOCKETT_1H01G217200	ATGGATGTGAATGGAAAATTATCTGATGTCGATTTAAAAAAAATGGATGCTGTTCACTCGAATGGACAGCCGGTGGATGATATCCTTATTTTAGAATCTGAAGGGGATGAAAATGAACTTGTAGTAGAAACTAATACCATAGAAGGTCCATTTGAGGAGCACAAGGAACACAAATCTGAGAAAATGGATGATAGTGTGCATGAAGAAGGATCCACTAGCACTGATGATGATTCAGACAGTGACTTGTATGGATATCTCCGCGAGTCAGAGAATGAACAAACTTCAGAGTCTGATGTTGAGGAGAAAGACATCGAGGTGTCTATCCCTGAGGAGAAAGTCAAAGAATTAGTTGCCGAATTCCATGACGTTGAGAGCAAAGCTGCTGAGGCGCAAGAATCA…	chr1H:239716026-239734763	Horvu_10350_1H01G237700	ATGGATGTGAATGGAAAATTATCTGATGTCGATTTAAAAAAAATGGATGCTGTTCACTCGAATGGACAGCCGGTGGATGATATCCTTATTTTAGAATCTGAAGGGGATGAAAATGAACTTGTAGTAGAAACTAATACCATAGAAGGTCCATTTGAGGAGCACAAGGAACACAAATCTGAGAAAATGGATGATAGTGTGCATGAAGAAGGATCCACTAGCACTGATGATGATTCAGACAGTGACTTGTATGGATATCTCCGCGAGTCAGAGAATGAACAAACTTCAGAGTCTGATGTTGAGGAGAAAGACATCGAGGTGTCTATCCCTGAGGAGAAAGTCAAAGAATTAGTTGCCGAATTCCATGACGTTGAGAGCAAAGCTGCTGAGGCGCAAGAATCA…	chr1H:250612874-250631611	Horvu_13821_1H01G224700	ATGGATGTGAATGGAAAATTATCTGATGTCGATTTAAAAAAAATGGATGCTGTTCACTCGAATGGACAGCCGGTGGATGATATCCTTATTTTAGAATCTGAAGGGGATGAAAATGAACTTGTAGTAGAAACTAATACCATAGAAGGTCCATTTGAGGAGCACAAGGAACACAAATCTGAGAAAATGGATGATAGTGTGCATGAAGAAGGATCCACTAGCACTGATGATGATTCAGACAGTGACTTGTATGGATATCTCCGCGAGTCAGAGAATGAACAAACTTCAGAGTCTGATGTTGAGGAGAAAGACATCGAGGTGTCTATCCCTGAGGAGAAAGTCAAAGAATTAGTTGCCGAATTCCATGACGTTGAGAGCAAAGCTGCTGAGGCGCAAGAATCA…	chr1H:259764482-259783408	Horvu_13942_1H01G223200	ATGGATGTGAATGGAAAATTATCTGATGTCGATTTAAAAAAAATGGATGCTGTTCACTCGAATGGACAGCCGGTGGATGATATCCTTATTTTAGAATCTGAAGGGGATGAAAATGAACTTGTAGTAGAAACTAATACCATAGAAGGTCCATTTGAGGAGCACAAGGAACACAAATCTGAGAAAATGGATGATAGTGTGCATGAAGAAGGATCCACTAGCACTGATGATGATTCAGACAGTGACTTGTATGGATATCTCCGCGAGTCAGAGAATGAACAAACTTCAGAGTCTGATGTTGAGGAGAAAGACATCGAGGTGTCTATCCCTGAGGAGAAAGTCAAAGAATTAGTTGCCGAATTCCATGACGTTGAGAGCAAAGCTGCTGAGGCGCAAGAATCA…	chr1H:254123280-254142017	Horvu_21599_1H01G223100	ATGGATGTGAATGGAAAATTATCTGATGTCGATTTAAAAAAAATGGATGCTGTTCACTCGAATGGACAGCCGGTGGATGATATCCTTATTTTAGAATCTGAAGGGGATGAAAATGAACTTGTAGTAGAAACTAATACCATAGAAGGTCCATTTGAGGAGCACAAGGAACACAAATCTGAGAAAATGGATGATAGTGTGCATGAAGAAGGATCCACTAGCACTGATGATGATTCAGACAGTGACTTGTATGGATATCTCCGCGAGTCAGAGAATGAACAAACTTCAGAGTCTGATGTTGAGGAGAAAGACATCGAGGTGTCTATCCCTGAGGAGAAAGTCAAAGAATTAGTTGCCGAATTCCATGACGTTGAGAGCAAAGCTGCTGAGGCGCAAGAATCA…	chr1H:260205362-260224071	Horvu_3081_1H01G232400	ATGGATGTGAATGGAAAATTATCTGATGTCGATTTAAAAAAAATGGATGCTGTTCACTCGAATGGACAGCCGGTGGATGATATCCTTATTTTAGAATCTGAAGGGGATGAAAATGAACTTGTAGTAGAAACTAATACCATAGAAGGTCCATTTGAGGAGCACAAGGAACACAAATCTGAGAAAATGGATGATAGTGTGCATGAAGAAGGATCCACTAGCACTGATGATGATTCAGACAGTGACTTGTATGGATATCTCCGCGAGTCAGAGAATGAACAAACTTCAGAGTCTGATGTTGAGGAGAAAGACATCGAGGTGTCTATCCCTGAGGAGAAAGTCAAAGAATTAGTTGCCGAATTCCATGACGTTGAGAGCAAAGCTGCTGAGGCGCAAGAATCA…	chr1H:254401529-254420266	Horvu_HHOR_1H01G227700	ATGGATGTGAATGGAAAATTATCTGATGTCGATTTAAAAAAAATGGATGCTGTTCACTCGAATGGACAGCCGGTGGATGATATCCTTATTTTAGAATCTGAAGGGGATGAAAATGAACTTGTAGTAGAAACTAATACCATAGAAGGTCCATTTGAGGAGCACAAGGAACACAAATCTGAGAAAATGGATGATAGTGTGCATGAAGAAGGATCCACTAGCACTGATGATGATTCAGACAGTGACTTGTATGGATATCTCCGCGAGTCAGAGAATGAACAAACTTCAGAGTCTGATGTTGAGGAGAAAGACATCGAGGTGTCTATCCCTGAGGAGAAAGTCAAAGAATTAGTTGCCGAATTCCATGACGTTGAGAGCAAAGCTGCTGAGGCGCAAGAATCA…	chr1H:272121551-272140851	Horvu_7552_1H01G231500	ATGGATGTGAATGGAAAATTATCTGATGTCGATTTAAAAAAAATGGATGCTGTTCACTCGAATGGACAGCCGGTGGATGATATCCTTATTTTAGAATCTGAAGGGGATGAAAATGAACTTGTAGTAGAAACTAATACCATAGAAGGTCCATTTGAGGAGCACAAGGAACACAAATCTGAGAAAATGGATGATAGTGTGCATGAAGAAGGATCCACTAGCACTGATGATGATTCAGACAGTGACTTGTATGGATATCTCCGCGAGTCAGAGAATGAACAAACTTCAGAGTCTGATGTTGAGGAGAAAGACATCGAGGTGTCTATCCCTGAGGAGAAAGTCAAAGAATTAGTTGCCGAATTCCATGACGTTGAGAGCAAAGCTGCTGAGGCGCAAGAATCA…	chr1H:255077049-255095786	Horvu_8148_1H01G227300	ATGGATGTGAATGGAAAATTATCTGATGTCGATTTAAAAAAAATGGATGCTGTTCACTCGAATGGACAGCCGGTGGATGATATCCTTATTTTAGAATCTGAAGGGGATGAAAATGAACTTGTAGTAGAAACTAATACCATAGAAGGTCCATTTGAGGAGCACAAGGAACACAAATCTGAGAAAATGGATGATAGTGTGCATGAAGAAGGATCCACTAGCACTGATGATGATTCAGACAGTGACTTGTATGGATATCTCCGCGAGTCAGAGAATGAACAAACTTCAGAGTCTGATGTTGAGGAGAAAGACATCGAGGTGTCTATCCCTGAGGAGAAAGTCAAAGAATTAGTTGCCGAATTCCATGACGTTGAGAGCAAAGCTGCTGAGGCGCAAGAATCA…	chr1H:256823569-256842306	Horvu_9043_1H01G227400	ATGGATGTGAATGGAAAATTATCTGATGTCGATTTAAAAAAAATGGATGCTGTTCACTCGAATGGACAGCCGGTGGATGATATCCTTATTTTAGAATCTGAAGGGGATGAAAATGAACTTGTAGTAGAAACTAATACCATAGAAGGTCCATTTGAGGAGCACAAGGAACACAAATCTGAGAAAATGGATGATAGTGTGCATGAAGAAGGATCCACTAGCACTGATGATGATTCAGACAGTGACTTGTATGGATATCTCCGCGAGTCAGAGAATGAACAAACTTCAGAGTCTGATGTTGAGGAGAAAGACATCGAGGTGTCTATCCCTGAGGAGAAAGTCAAAGAATTAGTTGCCGAATTCCATGACGTTGAGAGCAAAGCTGCTGAGGCGCAAGAATCA…	chr1H:253998604-254017341	Horvu_IGRI_1H01G230800	ATGGATGTGAATGGAAAATTATCTGATGTCGATTTAAAAAAAATGGATGCTGTTCACTCGAATGGACAGCCGGTGGATGATATCCTTATTTTAGAATCTGAAGGGGATGAAAATGAACTTGTAGTAGAAACTAATACCATAGAAGGTCCATTTGAGGAGCACAAGGAACACAAATCTGAGAAAATGGATGATAGTGTGCATGAAGAAGGATCCACTAGCACTGATGATGATTCAGACAGTGACTTGTATGGATATCTCCGCGAGTCAGAGAATGAACAAACTTCAGAGTCTGATGTTGAGGAGAAAGACATCGAGGTGTCTATCCCTGAGGAGAAAGTCAAAGAATTAGTTGCCGAATTCCATGACGTTGAGAGCAAAGCTGCTGAGGCGCAAGAATCA…	chr1H:254688733-254707470	Horvu_OUN333_1H01G225300	ATGGATGTGAATGGAAAATTATCTGATGTCGATTTAAAAAAAATGGATGCTGTTCACTCGAATGGACAGCCGGTGGATGATATCCTTATTTTAGAATCTGAAGGGGATGAAAATGAACTTGTAGTAGAAACTAATACCATAGAAGGTCCATTTGAGGAGCACAAGGAACACAAATCTGAGAAAATGGATGATAGTGTGCATGAAGAAGGATCCACTAGCACTGATGATGATTCAGACAGTGACTTGTATGGATATCTCCGCGAGTCAGAGAATGAACAAACTTCAGAGTCTGATGTTGAGGAGAAAGACATCGAGGTGTCTATCCCTGAGGAGAAAGTCAAAGAATTAGTTGCCGAATTCCATGACGTTGAGAGCAAAGCTGCTGAGGCGCAAGAATCA…	chr1H:262072085-262090822
	DRD1_1	HORVU.MOREX.r3.2HG0108640	ATGTCACATCATGAGATGCTAAGCTACATGGCTGAAGATACGCTCAAGGGAGGACCTAAAGGTCGCCGTAGCCATCCCATCAGTGAAACTCCATTTGAGGCATTCTATGATGGCTCATGGCATGGAGTTAATTGTATAAGGATCAGGGATGGCGGGCTGTTCGTTAAATTTACCTACTCTAGCTCCACAGTCGAGCATAATGTGGATGGGGATCATCTGCGCCTACGCTCCAGAAGAGCTACGTACTTTGACTGCTCGCATGTTCTCAAGCCGGGTGTTGATATTTGTGTGCAATCGTCTCATCTACTGCAAGGAAGTCCGACTGGGGAAATGAAATCTTCGATGTTACTGTGTCATGATGCAAGGCTCATCACAATCAAGAGAAATCATATTGAAGAT…	chr2:28217525-28222573	Horvu_AKASHIN_2H01G088900	ATGTCACATCATGAGATGCTAAGCTACATGGCTGAAGATACGCTCAAGGGAGGACCTAAAGGTCGCCGTAGCCATCCCATCAGTGAAACTCCATTTGAGGCATTCTATGATGGCTCATGGCATGGAGTTAATTGTATAAGGATCAGGGATGGCGGGCTGTTCGTTAAATTTACCTACTCTAGCTCCACAGTCGAGCATAATGTGGATGGGGATCATCTGCGCCTACGCTCCAGAAGAGCTACGTACTTTGACTGCTCGCATGTTCTCAAGCCGGGTGTTGATATTTGTGTGCAATCGTCTCATCTACTGCAAGGAAGTCCGACTGGGGAAATGAAATCTTCGATGTTACTGTGTCATGATGCAAGGCTCATCACAATCAAGAGAAATCATATTGAAGAT…	chr2H:27420044-27425092	Horvu_BARKE_2H01G094700	ATGTCACATCATGAGATGCTAAGCTACATGGCTGAAGATACGCTCAAGGGAGGACCTAAAGGTCGCCGTAGCCATCCCATCAGTGAAACTCCATTTGAGGCATTCTATGATGGCTCATGGCATGGAGTTAATTGTATAAGGATCAGGGATGGCGGGCTGTTCGTTAAATTTACCTACTCTAGCTCCACAGTCGAGCATAATGTGGATGGGGATCATCTGCGCCTACGCTCCAGAAGAGCTACGTACTTTGACTGCTCGCATGTTCTCAAGCCGGGTGTTGATATTTGTGTGCAATCGTCTCATCTACTGCAAGGAAGTCCGACTGGGGAAATGAAATCTTCGATGTTACTGTGTCATGATGCAAGGCTCATCACAATCAAGAGAAATCATATTGAAGAT…	chr2H:25411036-25416072	Horvu_GOLDEN_2H01G076200	ATGTCACATCATGAGATGCTAAGCTACATGGCTGAAGATACGCTCAAGGGAGGACCTAAAGGTCGCCATAGCCATCCCATCAGTGAAACTCCATTTGAGGCATTCTATGATGGCTCATGGCATGGAGTTAATTGTATAAGGATCAGGGATGGCGGGCTGTTCGTTAAATTTACCTACTCTAGCTCCACAGTCGAGCATAATGTGGATGGGGATCATCTGCGCCTACGCTCCAGAAGAGCTACGTACTTTGACTGCTCGCATGTTCTCAAGCCGGGTGTTGATATTTGTGTGCAATCGTCTCATCTACTGCAAGGAAGTCCGACTGGGGAAATGAAATCTTCGATGTTACTGTGTCATGATGCAAGGCTCATCACAATCAAGAGAAATCATATTGAAGAT…	chr2H:19614439-19619487	Horvu_HOCKETT_2H01G077400	ATGTCACATCATGAGATGCTAAGCTACATGGCTGAAGATACGCTCAAGGGAGGACCTAAAGGTCGCCGTAGCCATCCCATCAGTGAAACTCCATTTGAGGCATTCTATGATGGCTCATGGCATGGAGTTAATTGTATAAGGATCAGGGATGGCGGGCTGTTCGTTAAATTTACCTACTCTAGCTCCACAGTCGAGCATAATGTGGATGGGGATCATCTGCGCCTACGCTCCAGAAGAGCTACGTACTTTGACTGCTCGCATGTTCTCAAGCCGGGTGTTGATATTTGTGTGCAATCGTCTCATCTACTGCAAGGAAGTCCGACTGGGGAAATGAAATCTTCGATGTTACTGTGTCATGATGCAAGGCTCATCACAATCAAGAGAAATCATATTGAAGAT…	chr2H:20645939-20650986	Horvu_10350_2H01G093400	ATGTCACATCATGAGATGCTAAGCTACATGGCTGAAGATACGCTCAAGGGAGGACCTAAAGGTCGCCGTAGCCATCCCATCAGTGAAACTCCATTTGAGGCATTCTATGATGGCTCATGGCATGGAGTTAATTGTATAAGGATCAGGGATGGCGGGCTGTTCGTTAAATTTACCTACTCTAGCTCCACAGTCGAGCATAATGTGGATGGGGATCATCTGCGCCTACGCTCCAGAAGAGCTACGTACTTTGACTGCTCGCATGTTCTCAAGCCGGGTGTTGATATTTGTGTGCAATCGTCTCATCTACTGCAAGGAAGTCCGACTGGGGAAATGAAATCTTCGATGTTACTGTGTCATGATGCAAGGCTCATCACAATCAAGAGAAATCATATTGAAGAT…	chr2H:26787265-26792312	Horvu_13821_2H01G090100	ATGTCACATCATGAGATGCTAAGCTACATGGCTGAAGATACGCTCAAGGGAGGACCTAAAGGTCGCCGTAGCCATCCCATCAGTGAAACTCCATTTGAGGCATTCTATGATGGCTCATGGCATGGAGTTAATTGTATAAGGATCAGGGATGGCGGGCTGTTCGTTAAATTTACCTACTCTAGCTCCACAGTCGAGCATAATGTGGATGGGGATCATCTGCGCCTACGCTCCAGAAGAGCTACGTACTTTGACTGCTCGCATGTTCTCAAGCCGGGTGTTGATATTTGTGTGCAATCGTCTCATCTACTGCAAGGAAGTCCGACTGGGGAAATGAAATCTTCGATGTTACTGTGTCATGATGCAAGGCTCATCACAATCAAGAGAAATCATATTGAAGAT…	chr2H:27558162-27563198	Horvu_13942_2H01G088600	ATGTCACATCATGAGATGCTAAGCTACATGGCTGAAGATACGCTCAAGGGAGGACCTAAAGGTCGCCGTAGCCATCCCATCAGTGAAACTCCATTTGAGGCATTCTATGATGGCTCATGGCATGGAGTTAATTGTATAAGGATCAGGGATGGCGGGCTGTTCGTTAAATTTACCTACTCTAGCTCCACAGTCGAGCATAATGTGGATGGGGATCATCTGCGCCTACGCTCCAGAAGAGCTACGTACTTTGACTGCTCGCATGTTCTCAAGCCGGGTGTTGATATTTGTGTGCAATCGTCTCATCTACTGCAAGGAAGTCCGACTGGGGAAATGAAATCTTCGATGTTACTGTGTCATGATGCAAGGCTCATCACAATCAAGAGAAATCATATTGAAGAT…	chr2H:24482858-24487905	Horvu_21599_2H01G091100	ATGTCACATCATGAGATGCTAAGCTACATGGCTGAAGATACGCTCAAGGGAGGACCTAAAGGTCGCCGTAGCCATCCCATCAGTGAAACTCCATTTGAGGCATTCTATGATGGCTCATGGCATGGAGTTAATTGTATAAGGATCAGGGATGGCGGGCTGTTCGTTAAATTTACCTACTCTAGCTCCACAGTCGAGCATAATGTGGATGGGGATCATCTGCGCCTACGCTCCAGAAGAGCTACGTACTTTGACTGCTCGCATGTTCTCAAGCCGGGTGTTGATATTTGTGTGCAATCGTCTCATCTACTGCAAGGAAGTCCGACTGGGGAAATGAAATCTTCGATGTTACTGTGTCATGATGCAAGGCTAATCACAATCAAGAGAAATCATATTGAAGAT…	chr2H:27179436-27184484	Horvu_3081_2H01G091000	ATGTCACATCATGAGATGCTAAGCTACATGGCTGAAGATACGCTCAAGGGAGGACCTAAAGGTCGCCGTAGCCATCCCATCAGTGAAACTCCATTTGAGGCATTCTATGATGGCTCATGGCATGGAGTTAATTGTATAAGGATCAGGGATGGCGGGCTGTTCGTTAAATTTACCTACTCTAGCTCCACAGTCGAGCATAATGTGGATGGGGATCATCTGCGCCTACGCTCCAGAAGAGCTACGTACTTTGACTGCTCGCATGTTCTCAAGCCGGGTGTTGATATTTGTGTGCAATCGTCTCATCTACTGCAAGGAAGTCCGACTGGGGAAATGAAATCTTCGATGTTACTGTGTCATGATGCAAGGCTCATCACAATCAAGAGAAATCATATTGAAGAT…	chr2H:25983007-25988054	Horvu_HHOR_2H01G086600	ATGTCACATCATGAGATGCTAAGCTACATGGCTGAAGATACGCTCAAGGGAGGACCTAAAGGTCGCCGTAGCCATCCCATCAGTGAAACTCCATTTGAGGCATTCTATGATGGCTCATGGCATGGAGTTAATTGTATAAGGATCAGGGATGGCGGGCTGTTCGTTAAATTTACCTACTCTAGCTCCACAGTCGAGCATAATGTGGATGGGGATCATCTGCGCCTACGCTCCAGAAGAGCTACGTACTTTGACTGCTCGCATGTTCTCAAGCCGGGTGTTGATATTTGTGTGCAATCGTCTCATCTACTGCAAGGAAGTCCGACTGGGGAAATGAAATCTTCGATGTTACTGTGTCATGATGCAAGGCTCATCACAATCAAGAGAAATCATATTGAAGAT…	chr2H:26853576-26858624	Horvu_7552_2H01G089400	ATGTCACATCATGAGATGCTAAGCTACATGGCTGAAGATACGCTCAAGGGAGGACCTAAAGGTCGCCGTAGCCATCCCATCAGTGAAACTCCATTTGAGGCATTCTATGATGGCTCATGGCATGGAGTTAATTGTATAAGGATCAGGGATGGCGGGCTGTTCGTTAAATTTACCTACTCTAGCTCCACAGTCGAGCATAATGTGGATGGGGATCATCTGCGCCTACGCTCCAGAAGAGCTACGTACTTTGACTGCTCGCATGTTCTCAAGCCGGGTGTTGATATTTGTGTGCAATCGTCTCATCTACTGCAAGGAAGTCCGACTGGGGAAATGAAATCTTCGATGTTACTGTGTCATGATGCAAGGCTCATCACAATCAAGAGAAATCATATTGAAGAT…	chr2H:24710014-24715061	Horvu_8148_2H01G092500	ATGTCACATCATGAGATGCTAAGCTACATGGCTGAAGATACGCTCAAGGGAGGACCTAAAGGTCGCCGTAGCCATCCCATCAGTGAAACTCCATTTGAGGCATTCTATGATGGCTCATGGCATGGAGTTAATTGTATAAGGATCAGGGATGGCGGGCTGTTCGTTAAATTTACCTACTCTAGCTCCACAGTCGAGCATAATGTGGATGGGGATCATCTGCGCCTACGCTCCAGAAGAGCTACGTACTTTGACTGCTCGCATGTTCTCAAGCCGGGTGTTGATATTTGTGTGCAATCGTCTCATCTACTGCAAGGAAGTCCGACTGGGGAAATGAAATCTTCGATGTTACTGTGTCATGATGCAAGGCTCATCACAATCAAGAGAAATCATATTGAAGAT…	chr2H:27001661-27006697	Horvu_9043_2H01G091700	ATGTCACATCATGAGATGCTAAGCTACATGGCTGAAGATACGCTCAAGGGAGGACCTAAAGGTCGCCGTAGCCATCCCATCAGTGAAACTCCATTTGAGGCATTCTATGATGGCTCATGGCATGGAGTTAATTGTATAAGGATCAGGGATGGCGGGCTGTTCGTTAAATTTACCTACTCTAGCTCCACAGTCGAGCATAATGTGGATGGGGATCATCTGCGCCTACGCTCCAGAAGAGCTACGTACTTTGACTGCTCGCATGTTCTCAAGCCGGGTGTTGATATTTGTGTGCAATCGTCTCATCTACTGCAAGGAAGTCCGACTGGGGAAATGAAATCTTCGATGTTACTGTGTCATGATGCAAGGCTAATCACAATCAAGAGAAATCATATTGAAGAT…	chr2H:27168097-27173145	Horvu_IGRI_2H01G089400	ATGTCACATCATGAGATGCTAAGCTACATGGCTGAAGATACGCTCAAGGGAGGACCTAAAGGTCGCCGTAGCCATCCCATCAGTGAAACTCCATTTGAGGCATTCTATGATGGCTCATGGCATGGAGTTAATTGTATAAGGATCAGGGATGGCGGGCTGTTCGTTAAATTTACCTACTCTAGCTCCACAGTCGAGCATAATGTGGATGGGGATCATCTGCGCCTACGCTCCAGAAGAGCTACGTACTTTGACTGCTCGCATGTTCTCAAGCCGGGTGTTGATATTTGTGTGCAATCGTCTCATCTACTGCAAGGAAGTCCGACTGGGGAAATGAAATCTTCGATGTTACTGTGTCATGATGCAAGGCTCATCACAATCAAGAGAAATCATATTGAAGAT…	chr2H:24731213-24736260	Horvu_OUN333_2H01G087700	ATGTCACATCATGAGATGCTAAGCTACATGGCTGAAGATACGCTCAAGGGAGGACCTAAAGGTCGCCGTAGCCATCCCATCAGTGAAACTCCATTTGAGGCATTCTATGATGGCTCATGGCATGGAGTTAATTGTATAAGGATCAGGGATGGCGGGCTGTTCGTTAAATTTACCTACTCTAGCTCCACAGTCGAGCATAATGTGGATGGGGATCATCTGCGCCTACGCTCCAGAAGAGCTACGTACTTTGACTGCTCGCATGTTCTCAAGCCGGGTGTTGATATTTGTGTGCAATCGTCTCATCTACTGCAAGGAAGTCCGACTGGGGAAATGAAATCTTCGATGTTACTGTGTCATGATGCAAGGCTAATCACAATCAAGAGAAATCATATTGAAGAT…	chr2H:27618622-27623670
	DRD1_2	HORVU.MOREX.r3.4HG0402720	ATGGATCCTACTAACTGCAAAAGGCAGAAGCATGAAATCGGGTGTGATAGCTCGCCGAGCACCCAGTCCCTGTCAACCATCATCAGTCATAACAGATCTGTACGTCTTAGATTTCTCAAAGAATTCAAGGAGTTGAAGTACGGGAGTGTCACTGAAGATTACAAGGCAATCAATAGAAAGAGGCATGAACTTATCAGCACGCTTGAAAAGCTGCAACTTGTACCTATCAAGTTGCCCTATGCCAGTGTAGCTCTCAAGTCTTCAAATGTGACATTACATGATGAAGCACAAACTGGGAACAATATTAATTCTGATAATATTATCGAATTGGATCTGTACAGTGTTGGATATGATACCCATGCTACCATGGACAATACTGGGGCTCAGAAAACTGTTTGC…	chr4:561791256-561796034	Horvu_AKASHIN_4H01G412600	ATGGATCCTACTAACTGCAAAAGGCAGAAGCATGAAATCGGGTGTGATAGCTCGCCGAGCACCCAGTCCCTGTCAACCATCATCAGTCATAACAGATCTGTACGTCTTAGATTTCTCAAAGAATTCAAGGAGTTGAAGTACGGGAGTGTCACTGAAGATTACAAGGCAATCAATAGAAAGAGGCATGAACTTATCAGCACGCTTGAAAAGCTGCAACTTGTACCTATCAAGTTGCCCTATGCCAGTGTAGCTCTCAAGTCTTCAAATGTGACATTACATGATGAAGCACAAACTGGGAACAATATTAATTCTGATAATATTATCGAATTGGATCTGTACAGTGTTGGATATGATACCCATGCTACCATGGACAATACTGGGGCTCAGAAAACTGTTTGC…	chr4H:598191616-598196288	Horvu_BARKE_4H01G418700	ATGGATCCTACTAACTGCAAAAGGCAGAAGCATGAAATCGGGTGTGATAGCTCGCCGAGCACCCAGTCCCTGTCAACCATCATCAGTCATAACAGATCTGTACGTCTTAGATTTCTCAAAGAATTCAAGGAGTTGAAGTACGGGAGTGTCACTGAAGATTACAAGGCAATCAATAGAAAGAGGCATGAACTTATCAGCACGCTTGAAAAGCTGCAACTTGTACCTATCAAGTTGCCCTATGCCAGTGTAGCTCTCAAGTCTTCAAATGTGACATTACATGATGAAGCACAAACTGGGAACAATATTAATTCTGATAATATTATCGAATTGGATCTGTACAGTGTTGGATATGATACCCATGCTACCATGGACAATACTGGGGCTCAGAAAACTGTTTGC…	chr4H:558601991-558606627	Horvu_GOLDEN_4H01G388600	ATGGATCCTACTAACTGCAAAAGGCAGAAGCATGAAATCGGGTGTGATAGCTCGCCGAGCACCCAGTCCCTGTCAACCATCATCAGTCATAACAGATCTGTACGTCTTAGATTTCTCAAAGAATTCAAGGAGTTGAAGTACGGGAGTGTCACTGAAGATTACAAGGCAATCAATAGAAAGAGGCATGAACTTATCAGCACGCTTGAAAAGCTGCAACTTGTACCTATCAAGTTGCCCTATGCCAGTGTAGCTCTCAAGTCTTCAAATGTGACATTACATGATGAAGCACAAACTGGGAACAATATTAATTCTGATAATATTATCGAATTGGATCTGTACAGTGTTGGATATGATACCCATGCTACCATGGACAATACTGGGGCTCAGAAAACTGTTTGC…	chr4H:535320027-535324663	Horvu_HOCKETT_4H01G401300	ATGGATCCTACTAACTGCAAAAGGCAGAAGCATGAAATCGGGTGTGATAGCTCGCCGAGCACCCAGTCCCTGTCAACCATCATCAGTCATAACAGATCTGTACGTCTTAGATTTCTCAAAGAATTCAAGGAGTTGAAGTACGGGAGTGTCACTGAAGATTACAAGGCAATCAATAGAAAGAGGCATGAACTTATCAGCACGCTTGAAAAGCTGCAACTTGTACCTATCAAGTTGCCCTATGCCAGTGTAGCTCTCAAGTCTTCAAATGTGACATTACATGATGAAGCACAAACTGGGAACAATATTAATTCTGATAATATTATCGAATTGGATCTGTACAGTGTTGGATATGATACCCATGCTACCATGGACAATACTGGGGCTCAGAAAACTGTTTGC…	chr4H:553739121-553743793	Horvu_10350_4H01G416700	ATGGATCCTACTAACTGCAAAAGGCAGAAGCATGAAATCGGGTGTGATAGCTCGCCGAGCACCCAGTCCCTGTCAACCATCATCAGTCATAACAGATCTGTACGTCTTAGATTTCTCAAAGAATTCAAGGAGTTGAAGTACGGGAGTGTCACTGAAGATTACAAGGCAATCAATAGAAAGAGGCATGAACTTATCAGCACGCTTGAAAAGCTGCAACTTGTACCTATCAAGTTGCCCTATGCCAGTGTAGCTCTCAAGTCTTCAAATGTGACATTACATGATGAAGCACAAACTGGGAACAATATTAATTCTGATAATATTATCGAATTGGATCTGTACAGTGTTGGATATGATACCCATGCTACCATGGACAATACTGGGGCTCAGAAAACTGTTTGC…	chr4H:561971103-561975775	Horvu_13821_4H01G412000	ATGGATCCTACTAACTGCAAAAGGCAGAAGCATGAAATCGGGTGTGATAGCTCGCCGAGCACCCAGTCCCTGTCAACCATCATCAGTCATAACAGATCTGTACGTCTTAGATTTCTCAAAGAATTCAAGGAGTTGAAGTACGGGAGTGTCACTGAAGATTACAAGGCAATCAATAGAAAGAGGCATGAACTTATCAGCACGCTTGAAAAGCTGCAACTTGTACCTATCAAGTTGCCCTATGCCAGTGTAGCTCTCAAGTCTTCAAATGTGACATTACATGATGAAGCACAAACTGGGAACAATATTAATTCTGATAATATTATCGAATTGGATCTGTACAGTGTTGGATATGATACCCATGCTACCATGGACAATACTGGGGCTCAGAAAACTGTTTGC…	chr4H:588146957-588151629	Horvu_13942_4H01G415500	ATGGATCCTACTAACTGCAAAAGGCAGAAGCATGAAATCGGGTGTGATAGCTCGCCGAGCACCCAGTCCCTGTCAACCATCATCAGTCATAACAGATCTGTACGTCTTAGATTTCTCAAAGAATTCAAGGAGTTGAAGTACGGGAGTGTCACTGAAGATTACAAGGCAATCAATAGAAAGAGGCATGAACTTATCAGCACGCTTGAAAAGCTGCAACTTGTACCTATCAAGTTGCCCTATGCCAGTGTAGCTCTCAAGTCTTCAAATGTGACATTACATGATGAAGCACAAACTGGGAACAATATTAATTCTGATAATATTATCGAATTGGATCTGTACAGTGTTGGATATGATACCCATGCTACCATGGACAATACTGGGGCTCAGAAAACTGTTTGC…	chr4H:575800483-575805119	Horvu_21599_4H01G413700	ATGGATCCTACTAACTGCAAAAGGCAGAAGCATGAAATCGGGTGTGATAGCTCGCCGAGCACCCAGTCCCTGTCAACCATCATCAGTCATAACAGATCTGTACGTCTTAGATTTCTCAAAGAATTCAAGGAGTTGAAGTACGGGAGTGTCACTGAAGATTACAAGGCAATCAATAGAAAGAGGCATGAACTTATCAGCACGCTTGAAAAGCTGCAACTTGTACCTATCAAGTTGCCCTATGCCAGTGTAGCTCTCAAGTCTTCAAATGTGACATTACATGATGAAGCACAAACTGGGAACAATATTAATTCTGATAATATTATCGAATTGGATCTGTACAGTGTTGGATATGATACCCATGCTACCATGGACAATACTGGGGCTCAGAAAACTGTTTGC…	chr4H:589135104-589139740	Horvu_3081_4H01G412000	ATGGATCCTACTAACTGCAAAAGGCAGAAGCATGAAATCGGGTGTGATAGCTCGCCGAGCACCCAGTCCCTGTCAACCATCATCAGTCATAACAGATCTGTACGTCTTAGATTTCTCAAAGAATTCAAGGAGTTGAAGTACGGGAGTGTCACTGAAGATTACAAGGCAATCAATAGAAAGAGGCATGAACTTATCAGCACGCTTGAAAAGCTGCAACTTGTACCTATCAAGTTGCCCTATGCCAGTGTAGCTCTCAAGTCTTCAAATGTGACATTACATGATGAAGCACAAACTGGGAACAATATTAATTCTGATAATATTATCGAATTGGATCTGTACAGTGTTGGATATGATACCCATGCTACCATGGACAATACTGGGGCTCAGAAAACTGTTTGC…	chr4H:575311321-575315957	Horvu_HHOR_4H01G415700	ATGGATCCTACTAACTGCAAAAGGCAGAAGCATGAAATCGGGTGTGATAGCTCGCCGAGCACCCAGTCCCTGTCAACCATCATCAGTCATAACAGATCTGTACGTCTTAGATTTCTCAAAGAATTCAAGGAGTTGAAGTACGGGAGTGTCACTGAAGATTACAAGGCAATCAATAGAAAGAGGCATGAACTTATCAGCACGCTTGAAAAGCTGCAACTTGTACCTATCAAGTTGCCCTATGCCAGTGTAGCTCTCAAGTCTTCAAATGTGACATTACATGATGAAGCACAAACTGGGAACAATATTAATTCTGATAATATTATCGAATTGGATCTGTACAGTGTTGGATATGATACCCATGCTACCATGGACAATACTGGGGCTCAGAAAACTGTTTGC…	chr4H:612583331-612588003	Horvu_7552_4H01G410500	ATGGATCCTACTAACTGCAAAAGGCAGAAGCATGAAATCGGGTGTGATAGCTCGCCGAGCACCCAGTCCCTGTCAACCATCATCAGTCATAACAGATCTGTACGTCTTGGATTTCTCAAAGAATTCAAGGAGTTGAAGTACCGGAGTGTCACTGAAGATTACAAGGCAATCAATAGAAAGAGGCATGAACTTATCAGCACGCTTGAAAAGCTGCAACTTGTACCTATCAAGTTGCCCTATGCCAGTGTAGCTCTCAAGTCTTCAAATGTGACATTACATGATGAAGCACAAACTGGGAACAATATTAATTCTGATAATATTATCGAATTGGATCTGTACAGTGTTGGATATGATACCCATGCTACCATGGACAATACTGGGGCTCAGAAAACTGTTTGC…	chr4H:574712210-574716832	Horvu_8148_4H01G415300	ATGGATCCTACTAACTGCAAAAGGCAGAAGCATGAAATCGGGTGTGATAGCTCGCCGAGCACCCAGTCCCTGTCAACCATCATCAGTCATAACAGATCTGTACGTCTTAGATTTCTCAAAGAATTCAAGGAGTTGAAGTACGGGAGTGTCACTGAAGATTACAAGGCAATCAATAGAAAGAGGCATGAACTTATCAGCACGCTTGAAAAGCTGCAACTTGTACCTATCAAGTTGCCCTATGCCAGTGTAGCTCTCAAGTCTTCAAATGTGACATTACATGATGAAGCACAAACTGGGAACAATATTAATTCTGATAATATTATCGAATTGGATCTGTACAGTGTTGGATATGATACCCATGCTACCATGGACAATACTGGGGCTCAGAAAACTGTTTGC…	chr4H:577425785-577430457	Horvu_9043_4H01G411600	ATGGATCCTACTAACTGCAAAAGGCAGAAGCATGAAATCGGGTGTGATAGCTCGCCGAGCACCCAGTCCCTGTCAACCATCATCAGTCATAACAGATCTGTACGTCTTAGATTTCTCAAAGAATTCAAGGAGTTGAAGTACGGGAGTGTCACTGAAGATTACAAGGCAATCAATAGAAAGAGGCATGAACTTATCAGCACGCTTGAAAAGCTGCAACTTGTACCTATCAAGTTGCCCTATGCCAGTGTAGCTCTCAAGTCTTCAAATGTGACATTACATGATGAAGCACAAACTGGGAACAATATTAATTCTGATAATATTATCGAATTGGATCTGTACAGTGTTGGATATGATACCCATGCTACCATGGACAATACTGGGGCTCAGAAAACTGTTTGC…	chr4H:579381290-579385962	Horvu_IGRI_4H01G413100	ATGGATCCTACTAACTGCAAAAGGCAGAAGCATGAAATCGGGTGTGATAGCTCGCCGAGCACCCAGTCCCTGTCAACCATCATCAGTCATAACAGATCTGTACGTCTTAGATTTCTCAAAGAATTCAAGGAGTTGAAGTACGGGAGTGTCACTGAAGATTACAAGGCAATCAATAGAAAGAGGCATGAACTTATCAGCACGCTTGAAAAGCTGCAACTTGTACCTATCAAGTTGCCCTATGCCAGTGTAGCTCTCAAGTCTTCAAATGTGACATTACATGATGAAGCACAAACTGGGAACAATATTATCGAATTGGATCTGTACAGTGTTGGATATGATACCCATGCTACCATGGACAATACTGGGGCTCAGAAAACTGTTTGCTTACTTGATTCTGAT…	chr4H:573104411-573109067	Horvu_OUN333_4H01G416300	ATGGATCCTACTAACTGCAAAAGGCAGAAGCATGAAATCGGGTGTGATAGCTCGCCGAGCACCCAGTCCCTGTCAACCATCATCAGTCATAACAGATCTGTACGTCTTGGATTTCTCAAAGAATTCAAGGAGTTGAAGTACCGGAGTGTCACTGAAGATTACAAGGCAATCAATAGAAAGAGGCATGAACTTATCAGCACGCTTGAAAAGCTGCAACTTGTACCTATCAAGTTGCCCTATGCCAGTGTAGCTCTCAAGTCTTCAAATGTGACATTACATGATGAAGCACAAACTGGGAACAATATTAATTCTGATAATATTATCGAATTGGATCTGTACAGTGTTGGATATGATACCCATGCTACCATGGACAATACTGGGGCTCAGAAAACTGTTTGC…	chr4H:595129915-595134552
	DRD1_3	HORVU.MOREX.r3.3HG0271560	ATGCCGACCACGCCGTCGCCCGGCGATCTCCCCAGCCGCAGGCCCCGCCGCCTGATCATGGACGACGACGACGGCGGTGGCGACCGCGCGCCGGAGGTCGCCGCGGCCGGGACCCAGCGCGTCGAGGCGGAGAGCGCCCAGGATTTGGTGCGAAACCCGCTCGCGCCCTCGTCCTCTTCGCAGCCGGCGGCTGCACCGGCCACCGGCGCCCAGCCCGCCGTGATCATCGAGATTGACGACGACGACCGCGCGCCGGTCGTCGCCACGGGCGAGGACCAGCGCATCAAGGCGGAAAGCGCCCGGGATTCGGTGCGAAACCCACTCGCGTACCCGTGCTCTTCGCGGCCGGTGGATGCACTGGGCAACGTCGGCCAGCCCGCCGAGATCATTGAAATCCCC…	chr3:364543469-364548182	Horvu_AKASHIN_3H01G309400	ATGCCGACCACGCCGTCGCCCGGCGATCTCCCCAGCCGCAGGCCCCGCCGCCTGATCATGGACGACGACGACGGCGGTGGCGACCGCGCGCCGGAGGTCGCCGCGGCCGGGACCCAGCGCGTCGAGGCGGAGAGCGCCCAGGATTTGGTGCGAAACCCGCTCGCGCCCTCGTCCTCTTCGCAGCCGGCGGCTGCACCGGCCACCGGCGCCCAGCCCGCCGTGATCATCGAGATTGACGACGACGACCGCGCGCCGGTCGTCGCCACGGGCGAGGACCAGCGCATCAAGGCGGAAAGCGCCCGGGATTCGGTGCGAAACCCACTCGCGTACCCGTGCTCTTCGCGGCCGGTGGATGCACTGGGCAACGTCGGCCAGCCCGCCGAGATCATTGAAATCCCC…	chr3H:381606328-381611023	Horvu_BARKE_3H01G312300	ATGCCGACCACGCCGTCGCCCGGCGATCTCCCCAGCCGCAGGCCCCGCCGCCTGATCATGGACGACGACGACGGCGGTGGCGACCGCGCGCCGGAGGTCGCCGCGGCCGGGACCCAGCGCATCGAGGCGGAGAGCGCCCAGGATTTGGTGCGAAACCCGCTCGCGCCGTCGTCCTCTTCGCAGCCGGCGGCTGCACCGGCCACCGGCGCCCAGCCCGCCGTGATCATCGAGATTGACGACGACGACCGCGCGCCGGTCGTCGCCACGGGCGAGGACCAGCGCATCAAGGCGGAAAGCGCCCGGGATTCGGTGCGAAACCCACTCGCGTACCCGTCCTCTTCGCGGCCGGTGGATGCACTGGGCAACGTCGGCCAGCCCGCCGAGATCATTGAAATCCCC…	chr3H:362921160-362925873	Horvu_GOLDEN_3H01G289500	ATGCCGACCACGCCGTCGCCCGGCGATCTCCCCAGCCGCAGGCCCCGCCGCCTGATCATGGACGACGACGACGGCGGTGGCGACCGCGCGCCGGAGGTCGCCGCGGCCGGGACCCAGCGCATCGAGGCGGAGAGCGCCCAGGATTTGGTGCGAAACCCGCTCGCGCCGTCGTCCTCTTCGCAGCCGGCGGCTGCACCGGCCACCGGCGCCCAGCCCGCCGTGATCATCGAGATTGACGACGACGACCGCGCGCCGGTCGTCGCCACGGGCGAGGACCAGCGCATCAAGGCGGAAAGCGCCCGGGATTCGGTGCGAAACCCACTCGCGTACCCGTCCTCTTCGCGGCCGGTGGATGCACTGGGCAACGTCGGCCAGCCCGCCGAGATCATTGAAATCCCC…	chr3H:340578800-340583513	Horvu_HOCKETT_3H01G299500	ATGCCGACCACGCCGTCGCCCGGCGATCTCCCCAGCCGCAGGCCCCGCCGCCTGATCATGGACGACGACGACGGCGGTGGCGACCGCGCGCCGGAGGTCGCCGCGGCCGGGACCCAGCGCATCGAGGCGGAGAGCGCCCAGGATTTGGTGCGAAACCCGCTCGCGCCGTCGTCCTCTTCGCAGCCGGCGGCTGCACCGGCCACCGGCGCCCAGCCCGCCGTGATCATCGAGATTGACGACGACGACCGCGCGCCGGTCGTCGCCACGGGCGAGGACCAGCGCATCAAGGCGGAAAGCGCCCGGGATTCGGTGCGAAACCCACTCGCGTACCCGTCCTCTTCGCGGCCGGTGGATGCACTGGGCAACGTCGGCCAGCCCGCCGAGATCATTGAAATCCCC…	chr3H:352064351-352069064	Horvu_10350_3H01G307800	ATGCCGACCACGCCGTCGCCCGGCGATCTCCCCAGCCGCAGGCCCCGCCGCCTGATCATGGACGACGACGACGGCGGTGGCGACCGCGCGCCGGAGGTCGCCGCGGCCGGGACCCAGCGCGTCGAGGCGGAGAGCGCCCAGGATTTGGTGCGAAACCCGCTCGCGCCCTCGTCCTCTTCGCAGCCGGCGGCTGCACCGGCCACCGGCGCCCAGCCCGCCGTGATCATCGAGATTGACGACGACGACCGCGCGCCGGTCGTCGCCACGGGCGAGGACCAGCGCATCAAGGCGGAAAGCGCCCGGGATTCGGTGCGAAACCCACTCGCGTACCCGTGCTCTTCGCGGCCGGTGGATGCACTGGGCAACGTCGGCCAGCCCGCCGAGATCATTGAAATCCCC…	chr3H:359818483-359823178	Horvu_13821_3H01G305400	ATGCCGACCACGCCGTCGCCCGGCGATCTCCCCAGCCGCAGGCCCCGCCGCCTGATCATGGACGACGACGACGGCGGTGGCGACCGCGCGCCGGAGGTCGCCGCGGCCGGGACCCAGCGCATCGAGGCGGAGAGCGCCCAGGATTTGGTGCGAAACCCGCTCGCGCCGTCGTCCTCTTCGCAGCCGGCGGCTGCACCGGCCACCGGCGCCCAGCCCGCCGTGATCATCGAGATTGACGACGACGACCGCGCGCCGGTCGTCGCCACGGGCGAGGACCAGCGCATCAAGGCGGAAAGCGCCCGGGATTCGGTGCGAAACCCACTCGCGTACCCGTCCTCTTCGCGGCCGGTGGATGCACTGGGCAACGTCGGCCAGCCCGCCGAGATCATTGAAATCCCC…	chr3H:376834617-376839330	Horvu_13942_3H01G307000	ATGCCGACCACGCCGTCGCCCGGCGATCTCCCCAGCCGCAGGCCCCGCCGCCTGATCATGGACGACGACGACGGCGGTGGCGACCGCGCGCCGGAGGTCGCCGCGGCCGGGACCCAGCGCGTCGAGGCGGAGAGCGCCCAGGATTTGGTGCGAAACCCGCTCGCGCCCTCGTCCTCTTCGCAGCCGGCGGCTGCACCGGCCACCGGCGCCCAGCCCGCCGTGATCATCGAGATTGACGACGACGACCGCGCGCCGGTCGTCGCCACGGGCGAGGACCAGCGCATCAAGGCGGAAAGCGCCCGGGATTCGGTGCGAAACCCACTCGCGTACCCGTGCTCTTCGCGGCCGGTGGATGCACTGGGCAACGTCGGCCAGCCCGCCGAGATCATTGAAATCCCC…	chr3H:370822215-370826934	Horvu_21599_3H01G310900	ATGCCGACCACGCCGTCGCCCGGCGATCTCCCCAGCCGCAGGCCCCGCCGCCTGATCATGGACGACGACGACGGCGGTGGCGACCGCGCGCCGGAGGTCGCCGCGGCCGGGACCCAGCGCGTCGAGGCGGAGAGCGCCCAGGATTTGGTGCGAAACCCGCTCGCGCCCTCGTCCTCTTCGCAGCCGGCGGCTGCACCGGCCACCGGCGCCCAGCCCGCCGTGATCATCGAGATTGACGACGACGACCGCGCGCCGGTCGTCGCCACGGGCGAGGACCAGCGCATCAAGGCGGAAAGCGTCCGGGATTCGGTGCGAAACCCACTCGCGTACCCGTGCTCTTCGCGGCCGGTGGATGCACTGGGCAACGTCGGCCAGCCCGCCGAGATCATTGAAATCCCC…	chr3H:378876733-378881446	Horvu_3081_3H01G304100	ATGCCGACCACGCCGTCGCCCGGCGATCTCCCCAGCCGCAGGCCCCGCCGCCTGATCATGGACGACGACGACGGCGGTGGCGACCGCGCGCCGGAGGTCGCCGCGGCCGGGACCCAGCGCGTCGAGGCGGAGAGCGCCCAGGATTTGGTGCGAAACCCGCTCGCGCCCTCGTCCTCTTCGCAGCCGGCGGCTGCACCGGCCACCGGCGCCCAGCCCGCCGTGATCATCGAGATTGACGACGACGACCGCGCGCCGGTCGTCGCCACGGGCGAGGACCAGCGCATCAAGGCGGAAAGCGCCCGGGATTCGGTGCGAAACCCACTCGCGTACCCGTGCTCTTCGCGGCCGGTGGATGCACTGGGCAACGTCGGCCAGCCCGCCGAGATCATTGAAATCCCC…	chr3H:366639071-366643784	Horvu_HHOR_3H01G306300	ATGCCGACCACGCCGTCGCCCGGCGATCTCCCCAGCCGCAGGCCCCGCCGCCTGATCATGGACGACGACGACGGCGGTGGCGACCGCGCGCCGGAGGTCGCCGCGGCCGGGACCCAGCGCATCGAGGCGGAGAGCGCCCAGGATTTGGTGCGAAACCCGCTCGCGCCGTCGTCCTCTTCGCAGCCGGCGGCTGCACCGGCCACCGGCGCCCAGCCCGCCGTGATCATCGAGATTGACGACGACGACCGCGCGCCGGTCGTCGCCACGGGCGAGGACCAGCGCATCAAGGCGGAAAGCGCCCGGGATTCGGTGCGAAACCCACTCGCGTACCCGTCCTCTTCGCGGCCGGTGGATGCACTGGGCAACGTCGGCCAGCCCGCCGAGATCATTGAAATCCCC…	chr3H:394516835-394521548	Horvu_7552_3H01G310400	ATGCCGACCACGCCGTCGCCCGGCGATCTCCCCAGCCGCAGGCCCCGCCGCCTGATCATGGACGACGACGACGGCGGTGGCGACCGCGCGCCGGAGGTCGCCGCGGCCGGGACCCAGCGCGTCGAGGCGGAGAGCGCCCAGGATTTGGTGCGAAACCCGCTCGCGCCCTCGTCCTCTTCGCAGCCGGCGGCTGCACCGGCCACCGGCGCCCAGCCCGCCGTGATCATCGAGATTGACGACGACGACCGCGCGCCGGTCGTCGCCACGGGCGAGGACCAGCGCATCAAGGCGGAAAGCGCCCGGGATTCGGTGCGAAACCCACTCGCGTACCCGTGCTCTTCGCGGCCGGTGGATGCACTGGGCAACGTCGGCCAGCCCGCCGAGATCATTGAAATCCCC…	chr3H:366068468-366073163	Horvu_8148_3H01G310900	ATGCCGACCACGCCGTCGCCCGGCGATCTCCCCAGCCGCAGGCCCCGCCGCCTGATCATGGACGACGACGACGGCGGTGGCGACCGCGCGCCGGAGGTCGCCGCGGCCGGGACCCAGCGCATCGAGGCGGAGAGCGCCCAGGATTTGGTGCGAAACCCGCTCGCGCCGTCGTCCTCTTCGCAGCCGGCGGCTGCACCGGCCACCGGCGCCCAGCCCGCCGTGATCATCGAGATTGACGACGACGACCGCGCGCCGGTCGTCGCCACGGGCGAGGACCAGCGCATCAAGGCGGAAAGCGCCCGGGATTCGGTGCGAAACCCACTCGCGTACCCGTCCTCTTCGCGGCCGGTGGATGCACTGGGCAACGTCGGCCAGCCCGCCGAGATCATTGAAATCCCC…	chr3H:369193369-369198082	Horvu_9043_3H01G302400	ATGCCGACCACGCCGTCGCCCGGCGATCTCCCCAGCCGCAGGCCCCGCCGCCTGATCATGGACGACGACGACGGCGGTGGCGACCGCGCGCCGGAGGTCGCCGCGGCCGGGACCCAGCGCGTCGAGGCGGAGAGCGCCCAGGATTTGGTGCGAAACCCGCTCGCGCCCTCGTCCTCTTCGCAGCCGGCGGCTGCACCGGCCACCGGCGCCCAGCCCGCCGTGATCATCGAGATTGACGACGACGACCGCGCGCCGGTCGTCGCCACGGGCGAGGACCAGCGCATCAAGGCGGAAAGCGCCCGGGATTCGGTGCGAAACCCACTCGCGTACCCGTGCTCTTCGCGGCCGGTGGATGCACTGGGCAACGTCGGCCAGCCCGCCGAGATCATTGAAATCCCC…	chr3H:369240458-369245153	Horvu_IGRI_3H01G303900	ATGCCGACCACGCCGTCGCCCGGCGATCTCCCCAGCCGCAGGCCCCGCCGCCTGATCATGGACGACGACGACGGCGGTGGCGACCGCGCGCCGGAGGTCGCCGCGGCCGGGACCCAGCGCATCGAGGCGGAGAGCGCCCAGGATTTGGTGCGAAACCCGCTCGCGCCGTCGTCCTCTTCGCAGCCGGCGGCTGCACCGGCCACCGGCGCCCAGCCCGCCGTGATCATCGAGATTGACGACGACGACCGCGCGCCGGTCGTCGCCACGGGCGAGGACCAGCGCATCAAGGCGGAAAGCGCCCGGGATTCGGTGCGAAACCCACTCGCGTACCCGTCCTCTTCGCGGCCGGTGGATGCACTGGGCAACGTCGGCCAGCCCGCCGAGATCATTGAAATCCCC…	chr3H:366185511-366190224	Horvu_OUN333_3H01G306700	ATGCCGACCACGCCGTCGCCCGGCGATCTCCCCAGCCGCAGGCCCCGCCGCCTGATCATGGACGACGACGACGGCGGTGGCGATCGCGCGCCGGAGGTCGCCGCGGCCGGGACCCAGCGCGTCGAGGCGGAGAGCGCCCAGGATTTGGTGCGAAACCCGCTCGCGCCCTCGTCCTCTTCGCAGCCGGCGGCTGCACCGGCCACCGGCGCCCAGCCCGCCGTGATCATCGAGATTGACGACGACGACCGCGCGCCGGTCGTCGCCACGGGCGAGGACCAGCGCATCAAGGCGGAAAGCGCCCGGGATTCGGTGCGAAACCCACTCGCGTACCCGTGCTCTTCGCGGCCGGTGGATGCACTGGGCAACGTCGGCCAGCCCGCCGAGATCATTGAAATCCCC…	chr3H:379904491-379909204
	DRD1_4	HORVU.MOREX.r3.1HG0064430	ATGGATCGCTCCGCTCGCCGCCGCGCCCGCGGCGGCGGAGGATCCCCGCCGGCGCCCTCCACGCGCGCGCGCCGCCGCGGCGCCGCCGAGGCGATCGTCATCGACCTCGATGCCGCCGACGACGGGGCGGCACCTGCGGCTGCTGCTGCCGCCGCTAGCAGGCGCTCCTCCTCCTCTTCGGCGGCGACGACGCCGGTGCCGCTGGTTGGGTCGGTGGCGACGCGGACCCGATCGAGGAGGCTGACGATGCAGCCGCCGGCGCCGGAGGAGGCGCCCAGGGCCAAGAGGAGGAGGAAGGGGACGACGGGCGCGGATGCCGACGGAGGCGGTGGGAGCAAGGGCGCCCGGCCTTCCAAGTCGGAAACGAGACCGAATCGTCGTGGGCGGCCCCCGCGCGCC…	chr1:423600640-423606092	Horvu_AKASHIN_1H01G379100	ATGGATCGCTCCGCTCGCCGCCGCGCCCGCGGCGGCGGAGGATCCCCGCCGGCGCCCTCCACGCGCGCGCGCCGCCGCGGCGCCGCCGGGGCGATCGTCATCGACCTCGATGCCGCCGACGACGGGGCGGCACCTGCGGCTGCTGCTGCCGCTGCCGCCGCTAGCAGGCGCTCCTCCTCCTCTTCGGCGGCGACGACGCCGGTGCCGCTGGTTGGGTCGGTAGCGACGCGGACCCGATCGAGGAGGCTGACGATGCAGCCGCCGGCGCCGGAGGAGGCGCCCAGGGCCAAGAGGAGGAGGAAGGGGACGACGGGCGCGGATGCCGATGGAGGCGGTGGGAGCAAGGGCGCCCAGCCTTCCAAGTCGGAAACGAGACCGAATCGTCGTGGGCGCCCCCCG…	chr1H:442542882-442548340	Horvu_BARKE_1H01G394900	ATGGATCGCTCCGCTCGCCGCCGCGCCCGCGGCGGCGGAGGATCCCCGCCGGCGCCCTCCACGCGCGCGCGCCGCCGCGGCGCCGCCGGGGCGATCGTCATCGACCTCGATGCCGCCGACGACGGGGCGGCACCTGCGGCTGCTGCTGCCGCCGCTAGCAGGCGCTCCTCCTCCTCTTCGGCGGCGACGACGCCGGTGCCGCTGGTTGGGTCGGTGGCGACGCGGACCCGATCGAGGAGGCTGACGATGCAGCCGCCGGCGCCGGAGGAGGCGCCCAGGGCCAAGAGGAGGAGGAAGGGGACGACGGGCGCGGATGCCGACGGAGGCGGTGGGAGCAAGGGCGCCCGGCCTTCCAAGTCGGAAACGAGACCGAATCGTCGTGGGCGGCCCCCGCGCGCC…	chr1H:421354870-421360322	Horvu_GOLDEN_1H01G337200	ATGGATCGCTCCGCTCGCCGCCGCGCCCGCGGCGGCGGAGGATCCCCGCCGGCGCCCTCCACGCGCGCGCGCCGCCGCGGCGCCGCCGGGGCGATCGTCATCGACCTCGATGCCGCCGACGACGGGGCGGCACCTGCGGCTGCTGCTGCCGCCGCTAGCAGGCGCTCCTCCTCCTCTTCGGCGGCGACGACGCCGGTGCCGCTGGTTGGGTCGGTGGCGACGCGGACCCGATCGAGGAGGCTGACGATGCAGCCGCCGGCGCCGGAGGAGGCGCCCAGGGCCAAGAGGAGGAGGAAGGGGACGACGGGCGCGGATGCCGACGGAGGCGGTGGGAGCAAGGGCGCCCGGCCTTCCAAGTCGGAAACGAGACCGAATCGTCGTGGGCGGCCCCCGCGCGCC…	chr1H:392971631-392977083	Horvu_HOCKETT_1H01G366500	ATGGATCGCTCCGCTCGCCGCCGCGCCCGCGGCGGCGGAGGATCCCCGCCGGCGCCCTCCACGCGCGCGCGCCGCCGCGGCGCCGCCGGGGCGATCGTCATCGACCTCGATGCCGCCGACGACGGGGCGGCACCTGCGGCTGCTGCTGCCGCCGCTAGCAGGCGCTCCTCCTCCTCTTCGGCGGCGACGACGCCGGTGCCGCTGGTTGGGTCGGTGGCGACGCGGACCCGATCGAGGAGGCTGACGATGCAGCCGCCGGCGCCGGAGGAGGCGCCCAGGGCCAAGAGGAGGAGGAAGGGGACGACGGGCGCGGATGCCGACGGAGGCGGTGGGAGCAAGGGCGCCCGGCCTTCCAAGTCGGAAACGAGACCGAATCGTCGTGGGCGGCCCCCGCGCGCC…	chr1H:407085878-407091330	Horvu_10350_1H01G387400	ATGGATCGCTCCGCTCGCCGCCGCGCCCGCGGCGGCGGAGGATCCCCGCCGGCGCCCTCCACGCGCGCGCGCCGCCGCGGCGCCGCCGGGGCGATCGTCATCGACCTCGATGCCGCCGACGACGGGGCGGCACCTGCGGCTGCTGCTGCCGCCGCTAGCAGGCGCTCCTCCTCCTCTTCGGCGGCGACGACGCCGGTGCCGCTGGTTGGGTCGGTGGCGACGCGGACCCGATCGAGGAGGCTGACGATGCAGCCGCCGGCGCCGGAGGAGGCGCCCAGGGCCAAGAGGAGGAGGAAGGGGACGACGGGCGCGGATGCCGACGGAGGCGGTGGGAGCAAGGGCGCCCGGCCTTCCAAGTCGGAAACGAGACCGAATCGTCGTGGGCGGCCCCCGCGCGCC…	chr1H:420451189-420456641	Horvu_13821_1H01G377900	ATGGATCGCTCCGCTCGCCGCCGCGCCCGCGGCGGCGGAGGATCCCCGCCGGCGCCCTCCACGCGCGCGCGCCGCCGCGGCGCCGCCGGGGCGATCGTCATCGACCTCGATGCCGCCGACGACGGGGCGGCACCTGCGGCTGCTGCTGCCGCCGCTAGCAGGCGCTCCTCCTCCTCTTCGGCGGCGACGACGCCGGTGCCGCTGGTTGGGTCGGTAGCGACGCGGACCCGATCGAGGAGGCTGACGATGCAGCCGCCGGCGCCGGAGGAGGCGCCCAGGGCCAAGAGGAGGAGGAAGGGGACGACGGGCGCGGATGCCGATGGAGGCGGTGGGAGCAAGGGCGCCCAGCCTTCCAAGTCGGAAACGAGACCGAATCGTCGTGGGCGCCCCCCGCGCGCC…	chr1H:437341868-437347320	Horvu_13942_1H01G374300	ATGGATCGCTCCGCTCGCCGCCGCGCCCGCGGCGGCGGAGGATCCCCGCCGGCGCCCTCCACGCGCGCGCGCCGCCGCGGCGCCGCCGGGGCGATCGTCATCGACCTCGATGCCGCCGACGACGGGGCGGCACCTGCGGCTGCTGCTGCCGCCGCTAGCAGGCGCTCCTCCTCCTCTTCGGCGGCGACGACGCCGGTGCCGCTGGTTGGGTCGGTGGCGACGCGGACCCGATCGAGGAGGCTGACGATGCAGCCGCCGGCGCCGGAGGAGGCGCCCAGGGCCAAGAGGAGGAGGAAGGGGACGACGGGCGCGGATGCCGACGGAGGCGGTGGGAGCAAGGGCGCCCGGCCTTCCAAGTCGGAAACGAGACCGAATCGTCGTGGGCGGCCCCCGCGCGCC…	chr1H:427105299-427110751	Horvu_21599_1H01G375100	ATGGATCGCTCCGCTCGCCGCCGCGCCCGCGGCGGCGGAGGATCCCCGCCGGCGCCCTCCACGCGCGCGCGCCGCCGCGGCGCCGCCGGGGCGATCGTCATCGACCTCGATGCCGCCGACGACGGGGCGGCACCTGCGGCTGCTGCTGCCGCCGCTAGCAGGCGCTCCTCCTCCTCTTCGGCGGCGACGACGCCGGTGCCGCTGGTTGGGTCGGTGGCGACGCGGACCCGATCGAGGAGGCTGACGATGCAGCCGCCGGCGCCGGAGGAGGCGCCCAGGGCCAAGAGGAGGAGGAAGGGGACGACGGGCGCGGATGCCGACGGAGGCGGTGGGAGCAAGGGCGCCCGGCCTTCCAAGTCGGAAACGAGACCGAATCGTCGTGGGCGGCCCCCGCGCGCC…	chr1H:437716984-437722436	Horvu_3081_1H01G383000	ATGGATCGCTCCGCTCGCCGCCGCGCCCGCGGCGGCGGAGGATCCCCGCCGGCGCCCTCCACGCGCGCGCGCCGCCGCGGCGCCGCCGGGGCGATCGTCATCGACCTCGATGCCGCCGACGACGGGGCGGCACCTGCGGCTGCTGCTGCCGCCGCTAGCAGGCGCTCCTCCTCCTCTTCGGCGGCGACGACGCCGGTGCCGCTGGTTGGGTCGGTGGCGACGCGGACCCGATCGAGGAGGCTGACGATGCAGCCGCCGGCGCCGGAGGAGGCGCCCAGGGCCAAGAGGAGGAGGAAGGGGACGACGGGCGCGGATGCCGACGGAGGCGGTGGGAGCAAGGGCGCCCGGCCTTCCAAGTCGGAAACGAGACCGAATCGTCGTGGGCGGCCCCCGCGCGCC…	chr1H:426199666-426205118	Horvu_HHOR_1H01G377900	ATGGATCGCTCCGCTCGCCGCCGCGCCCGCGGCGGCGGAGGATCCCCGCCGGCGCCCTCCACGCGCGCGCGCCGCCGCGGCGCCGCCGAGGCGATCGTCATCGACCTCGATGCCGCCGACGACGGGGCGGCACCTGCGGCTGCTGCTGCCGCCGCTAGCAGGCGCTCCTCCTCCTCTTCGGCGGCGACGACGCCGGTGCCGCTGGTTGGGTCGGTGGCGACGCGGACCCGATCGAGGAGGCTGACGATGCAGCCGCCGGCGCCGGAGGAGGCGCCCAGGGCCAAGAGGAGGAGGAAGGGGACGACGGGCGCGGATGCCGACGGAGGCGGTGGGAGCAAGGGCGCCCGGCCTTCCAAGTCGGAAACGAGACCGAATCGTCGTGGGCGGCCCCCGCGCGCC…	chr1H:456085525-456090977	Horvu_7552_1H01G381500	ATGGATCGCTCCGCTCGCCGCCGCGCCCGCGGCGGCGGAGGATCCCCGCCGGCGCCCTCCACGCGCGCGCGCCGCCGCGGCGCCGCCGGGGCGATCGTCATCGACCTCGATGCCGCCGACGACGGGGCGGCACCTGCGGCTGCTGCTGCCGCCGCTAGCAGGCGCTCCTCCTCCTCTTCGGCGGCGACGACGCCGGTGCCGCTGGTTGGGTCGGTGGCGACGCGGACCCGATCGAGGAGGCTGACGATGCAGCCGCCGGCGCCGGAGGAGGCGCCCAGGGCCAAGAGGAGGAGGAAGGGGACGACGGGCGCGGATGCCGACGGAGGCGGTGGGAGCAAGGGCGCCCGGCCTTCCAAGTCGGAAACGAGACCGAATCGTCGTGGGCGGCCCCCGCGCGCC…	chr1H:427883766-427889218	Horvu_8148_1H01G379400	ATGGATCGCTCCGCTCGCCGCCGCGCCCGCGGCGGCGGAGGATCCCCGCCGGCGCCCTCCACGCGCGCGCGCCGCCGCGGCGCCGCCGGGGCGATCGTCATCGACCTCGATGCCGCCGACGACGGGGCGGCACCTGCGGCTGCTGCTGCCGCCGCTAGCAGGCGCTCCTCCTCCTCTTCGGCGGCGACGACGCCGGTGCCGCTGGTTGGGTCGGTGGCGACGCGGACCCGATCGAGGAGGCTGACGATGCAGCCGCCGGCGCCGGAGGAGGCGCCCAGGGCCAAGAGGAGGAGGAAGGGGACGACGGGCGCGGATGCCGACGGAGGCGGTGGGAGCAAGGGCGCCCGGCCTTCCAAGTCGGAAACGAGACCGAATCGTCGTGGGCGGCCCCCGCGCGCC…	chr1H:430861838-430867290	Horvu_9043_1H01G379500	ATGGATCGCTCCGCTCGCCGCCGCGCCCGCGGCGGCGGAGGATCCCCGCCGGCGCCCTCCACGCGCGCGCGCCGCCGCGGCGCCGCCGGGGCGATCGTCATCGACCTCGATGCCGCCGACGACGGGGCGGCACCTGCGGCTGCTGCTGCCGCCGCTAGCAGGCGCTCCTCCTCCTCTTCGGCGGCGACGACGCCGGTGCCGCTGGTTGGGTCGGTGGCGACGCGGACCCGATCGAGGAGGCTGACGATGCAGCCGCCGGCGCCGGAGGAGGCGCCCAGGGCCAAGAGGAGGAGGAAGGGGACGACGGGCGCGGATGCCGACGGAGGCGGTGGGAGCAAGGGCGCCCGGCCTTCCAAGTCGGAAACGAGACCGAATCGTCGTGGGCGGCCCCCGCGCGCC…	chr1H:429647485-429652937	Horvu_IGRI_1H01G377600	ATGGATCGCTCCGCTCGCCGCCGCGCCCGCGGCGGCGGAGGATCCCCGCCGGCGCCCTCCACGCGCGCGCGCCGCCGCGGCGCCGCCGGGGCGATCGTCATCGACCTCGATGCCGCCGACGACGGGGCGGCACCTGCGGCTGCTGCTGCCGCCGCTAGCAGGCGCTCCTCCTCCTCTTCGGCGGCGACGACGCCGGTGCCGCTGGTTGGGTCGGTGGCGACGCGGACCCGATCGAGGAGGCTGACGATGCAGCCGCCGGCGCCGGAGGAGGCGCCCAGGGCCAAGAGGAGGAGGAAGGGGACGACGGGCGCGGATGCCGACGGAGGCGGTGGGAGCAAGGGCGCCCGGCCTTCCAAGTCGGAAACGAGACCGAATCGTCGTGGGCGGCCCCCGCGCGCC…	chr1H:424881621-424887073	Horvu_OUN333_1H01G376800	ATGGATCGCTCCGCTCGCCGCCGCGCCCGCGGCGGCGGAGGATCCCCGCCGGCGCCCTCCACGCGCGCGCGCCGCCGCGGCGCCGCCGGGGCGATCGTCATCGACCTCGATGCCGCCGACGACGGGGCGGCACCTGCGGCTGCTGCTGCCGCCGCTAGCAGGCGCTCCTCCTCCTCTTCGGCGGCGACGACGCCGGTGCCGCTGGTTGGGTCGGTGGCGACGCGGACCCGATCGAGGAGGCTGACGATGCAGCCGCCGGCGCCGGAGGAGGCGCCCAGGGCCAAGAGGAGGAGGAAGGGGACGACGGGCGCGGATGCCGACGGAGGCGGTGGGAGCAAGGGCGCCCGGCCTTCCAAGTCGGAAACGAGACCGAATCGTCGTGGGCGGCCCCCGCGCGCC…	chr1H:441563928-441569380
	DRD1_5	HORVU.MOREX.r3.2HG0128530	ATGTATTACCACACAAAAAGGAAGCCTTCTGACCCCATCAGTGGCCTTTCACTTCCTGGTGCAAAGATGGTTGGCAATTGGGGATTTGGCAGTGTTACCAAGGACTGGGAAAGTGTGAATGCTCGGAAGTTCCAATTTATAAATTTCCTTTCTACTCTGCGTAAGCCCACTCAGAGTTATGTGGCGTGTGCTGAAGCTAATATGATTTATAGCTCTGTCGAGCAAACAGAGCAGAAAAAGAGCGAAGTGCTAATAATTCTTGATTCGGATAATGAAGATGAAAGCATGGCAGCATACAAACAACTTACGCCTGAGAAAAACAAACAGCTCTCATCTGAGAAAAACAAGCACCTGATACCATCGGAAAATGCTGGTACTCTCACAACATGTGTGGCAACC…	chr2:117564542-117569474	Horvu_AKASHIN_2H01G218300	ATGCGGCGGAGCAAGGAGACCGTGGCGCCACCCGCCGCTTTCCCCAGTCCTCTCCTCCTCTCCGCCCCGCTCCAAAAACCACAGTGCCGCGCTTCGCCGCCGTCAGCGGCCATGGACGTCGCCCCCGGCGAGGCGGCGCCCTCTGGCATGTATTACCACACAAAAAGGAAGCCTTCTGACCCCATCAGTGGCCTTTCACTTCCTGGTGCAAAGATGGTTGGCAATTGGGGATTTGGCAGTGTTACCAAGGACTGGGAAAGTGTGAATGCTCGGAAGTTCCAATTTATAAATTTCCTTTCTACTCTGCGTAAGCCCACTCAGAGTTATGTGGCGTGTGCTGAAGCTAATATGATTTATAGCTCTGTCGAGCAAACAGAGCAGAAAAAGAGCGAAGTGCTA…	chr2H:122727973-122736688	Horvu_BARKE_2H01G228200	ATGCGGCGGAGCAAGGAGACCGTGGCGCCACCCGCCGCTTTCCCCAGTCCTCTCCTCCTCTCCGCCCCGCTCCAAAAACCACAGTGCCGCGCTTCGCCGCCGTCAGCGGCCATGGACGTCGCCCCCGGCGAGGCGGCGCCCTCTGGCATGTATTACCACACAAAAAGGAAGCCTTCTGACCCCATCAGTGGCCTTTCACTTCCTGGTGCAAAGATGGTTGGCAATTGGGGATTTGGCAGTGTTACCAAGGACTGGGAAAGTGTGAATGCTCGGAAGTTCCAATTTATAAATTTCCTTTCTACTCTGCGTAAGCCCACTCAGAGTTATGTGGCGTGTGCTGAAGCTAATATGATTTATAGCTCTGTCGAGCAAACAGAGCAGAAAAAGAGCGAAGTGCTA…	chr2H:114600233-114608322	Horvu_GOLDEN_2H01G193500	ATGCGGCGGAGCAAGGAGACCGTGGCGCCACCCGCCGCTTTCCCCAGTCCTCTCCTCCTCTCCGCCCCGCTCCAAAAACCACAGTGCCGCGCTTCGCCGCCGTCAGCGGCCATGGACGTCGCCCCCGGCGAGGCGGCGCCCTCTGGCATGTATTACCACACAAAAAGGAAGCCTTCTGACCCCATCAGTGGCCTTTCACTTCCTGGTGCAAAGATGGTTGGCAATTGGGGATTTGGCAGTGTTACCAAGGACTGGGAAAGTGTGAATGCTCGGAAGTTCCAATTTATAAATTTCCTTTCTACTCTGCGTAAGCCCACTCAGAGTTATGTGGCGTGTGCTGAAGCTAATATGATTTATAGCTCTGTCGAGCAAACAGAGCAGAAAAAGAGCGAAGTGCTA…	chr2H:100095771-100103860	Horvu_HOCKETT_2H01G203100	ATGCGGCGGAGCAAGGAGACCGTGGCGCCACCCGCCGCTTTCCCCAGTCCTCTCCTCCTCTCCGCCCCGCTCCAAAAACCACAGTGCCGCGCTTCGCCGCCGTCAGCGGCCATGGACGTCGCCCCCGGCGAGGCGGCGCCCTCTGGCATGTATTACCACACAAAAAGGAAGCCTTCTGACCCCATCAGTGGCCTTTCACTTCCTGGTGCAAAGATGGTTGGCAATTGGGGATTTGGCAGTGTTACCAAGGACTGGGAAAGTGTGAATGCTCGGAAGTTCCAATTTATAAATTTCCTTTCTACTCTGCGTAAGCCCACTCAGAGTTATGTGGCGTGTGCTGAAGCTAATATGATTTATAGCTCTGTCGAGCAAACAGAGCAGAAAAAGAGCGAAGTGCTA…	chr2H:108162159-108169974	Horvu_10350_2H01G224700	ATGCGGCGGAGCAAGGAGACCGTGGCGCCACCCGCCGCTTTCCCCAGTCCTCTCCTCCTCTCCGCCCCGCTCCAAAAACCACAGTGCCGCGCTTCGCCGCCGTCAGCGGCCATGGACATCGCCCCCGGCGAGGCGGCGCCCTCTGGCATGTATTACCACACAAAAAGGAAGCCTTCTGACCCCATCAGTGGCCTTTCACTTCCTGGTGCAAAGATGGTTGGCAATTGGGGATTTGGCAGTGTTACCAAGGACTGGGAAAGTGTGAATGCTCGGAAGTTCCAATTTATAAATTTCCTTTCTACTCTGCGTAAGCCCACTCAGAGTTATGTGGCGTGTGCTGAAGCTAATATGATTTATAGCTCTGTCGAGCAAACAGAGCAGAAAAAGAGCGAAGTGCTA…	chr2H:115090680-115098764	Horvu_13821_2H01G220800	ATGCGGCGGAGCAAGGAGACCGTGGCGCCACCCGCCGCTTTCCCCAGTCCTCTCCTCCTCTCCGCCCCGCTCCAAAAACCACAGTGCCGCGCTTCGCCGCCGTCAGCGGCCATGGACGTCGCCCCCGGCGAGGCGGCGCCCTCTGGCATGTATTACCACACAAAAAGGAAGCCTTCTGACCCCATCAGTGGCCTTTCACTTCCTGGTGCAAAGATGGTTGGCAATTGGGGATTTGGCAGTGTTACCAAGGACTGGGAAAGTGTGAATGCTCGGAAGTTCCAATTTATAAATTTCCTTTCTACTCTGCGTAAGCCCACTCAGAGTTATGTGGCGTGTGCTGAAGCTAATATGATTTATAGCTCTGTCGAGCAAACAGAGCAGAAAAAGAGCGAAGTGCTA…	chr2H:121759653-121767742	Horvu_13942_2H01G218800	ATGCGGCGGAGCAAGGAGACCGTGGCGCCACCCGCCGCTTTCCCCAGTCCTCTCCTCCTCTCCGCCCCGCTCCAAAAACCACAGTGCCGCGCTTCGCCGCCGTCAGCGGCCATGGACATCGCCCCCGGCGAGGCGGCGCCCTCTGGCATGTATTACCACACAAAAAGGAAGCCTTCTGACCCCATCAGTGGCCTTTCACTTCCTGGTGCAAAGATGGTTGGCAATTGGGGATTTGGCAGTGTTACCAAGGACTGGGAAAGTGTGAATGCTCGGAAGTTCCAATTTATAAATTTCCTTTCTACTCTGCGTAAGCCCACTCAGAGTTATGTGGCGTGTGCTGAAGCTAATATGATTTATAGCTCTGTCGAGCAAACAGAGCAGAAAAAGAGCGAAGTGCTA…	chr2H:116816067-116824424	Horvu_21599_2H01G217700	ATGCGGCGGAGCAAGGAGACCGTGGCGCCACCCGCCGCTTTCCCCAGTCCTCTCCTCCTCTCCGCCCCGCTCCAAAAACCACAGTGCCGCGCTTCGCCGCCGTCAGCGGCCATGGACATCGCCCCCGGCGAGGCGGCGCCCTCTGGCATGTATTACCACACAAAAAGGAAGCCTTCTGACCCCATCAGTGGCCTTTCACTTCCTGGTGCAAAGATGGTTGGCAATTGGGGATTTGGCAGTGTTACCAAGGACTGGGAAAGTGTGAATGCTCGGAAGTTCCAATTTATAAATTTCCTTTCTACTCTGCGTAAGCCCACTCAGAGTTATGTGGCGTGTGCTGAAGCTAATATGATTTATAGCTCTGTCGAGCAAACAGAGCAGAAAAAGAGCGAAGTGCTA…	chr2H:120707172-120715529	Horvu_3081_2H01G219800	ATGCGGCGGAGCAAGGAGACCGTGGCGCCACCCGCCGCTTTCCCCAGTCCTCTCCTCCTCTCCGCCCCGCTCCAAAAACCACAGTGCCGCGCTTCGCCGCCGTCAGCGGCCATGGACATCGCCCCCGGCGAGGCGGCGCCCTCTGGCATGTATTACCACACAAAAAGGAAGCCTTCTGACCCCATCAGTGGCCTTTCACTTCCTGGTGCAAAGATGGTTGGCAATTGGGGATTTGGCAGTGTTACCAAGGACTGGGAAAGTGTGAATGCTCGGAAGTTCCAATTTATAAATTTCCTTTCTACTCTGCGTAAGCCCACTCAGAGTTATGTGGCGTGTGCTGAAGCTAATATGATTTATAGCTCTGTCGAGCAAACAGAGCAGAAAAAGAGCGAAGTGCTA…	chr2H:116583511-116591595	Horvu_HHOR_2H01G214800	ATGCGGCGGAGCAAGGAGACCGTGGCGCCACCCGCCGCTTTCCCCAGTCCTCTCCTCCTCTCCGCCCCGCTCCAAAAACCACAGTGCCGCGCTTCGCCGCCGTCAGCGGCCATGGACGTCGCCCCCGGCGAGGCGGCGCCCTCTGGCATGTATTACCACACAAAAAGGAAGCCTTCTGACCCCATCAGTGGCCTTTCACTTCCTGGTGCAAAGATGGTTGGCAATTGGGGATTTGGCAGTGTTACCAAGGACTGGGAAAGTGTGAATGCTCGGAAGTTCCAATTTATAAATTTCCTTTCTACTCTGCGTAAGCCCACTCAGAGTTATGTGGCGTGTGCTGAAGCTAATATGATTTATAGCTCTGTCGAGCAAACAGAGCAGAAAAAGAGCGAAGTGCTA…	chr2H:125608606-125616694	Horvu_7552_2H01G220000	ATGCGGCGGAGCAAGGAGACCGTGGCGCCACCCGCCGCTTTCCCCAGTCCTCTCCTCCTCTCCGCCCCGCTCCAAAAACCACAGTGCCGCGCTTCGCCGCCGTCAGCGGCCATGGACGTCGCCCCCGGCGAGGCGGCGCCCTCTGGCATGTATTACCACACAAAAAGGAAGCCTTCTGACCCCATCAGTGGCCTTTCACTTCCTGGTGCAAAGATGGTTGGCAATTGGGGATTTGGCAGTGTTACCAAGGACTGGGAAAGTGTGAATGCTCGGAAGTTCCAATTTATAAATTTCCTTTCTACTCTGCGTAAGCCCACTCAGAGTTATGTGGCGTGTGCTGAAGCTAATATGATTTATAGCTCTGTCGAGCAAACAGAGCAGAAAAAGAGCGAAGTGCTA…	chr2H:115057309-115065398	Horvu_8148_2H01G222100	ATGCGGCGGAGCAAGGAGACCGTGGCGCCACCCGCCGCTTTCCCCAGTCCTCTCCTCCTCTCCGCCCCGCTCCAAAAACCACAGTGCCGCGCTTCGCCGCCGTCAGCGGCCATGGACATCGCCCCCGGCGAGGCGGCGCCCTCTGGCATGTATTACCACACAAAAAGGAAGCCTTCTGACCCCATCAGTGGCCTTTCACTTCCTGGTGCAAAGATGGTTGGCAATTGGGGATTTGGCAGTGTTACCAAGGACTGGGAAAGTGTGAATGCTCGGAAGTTCCAATTTATAAATTTCCTTTCTACTCTGCGTAAGCCCACTCAGAGTTATGTGGCGTGTGCTGAAGCTAATATGATTTATAGCTCTGTCGAGCAAACAGAGCAGAAAAAGAGCGAAGTGCTA…	chr2H:118210858-118219163	Horvu_9043_2H01G222100	ATGCGGCGGAGCAAGGAGACCGTGGCGCCACCCGCCGCTTTCCCCAGTCCTCTCCTCCTCTCCGCCCCGCTCCAAAAACCACAGTGCCGCGCTTCGCCGCCGTCAGCGGCCATGGACGTCGCCCCCGGCGAGGCGGCGCCCTCTGGCATGTATTACCACACAAAAAGGAAGCCTTCTGACCCCATCAGTGGCCTTTCACTTCCTGGTGCAAAGATGGTTGGCAATTGGGGATTTGGCAGTGTTACCAAGGACTGGGAAAGTGTGAATGCTCGGAAGTTCCAATTTATAAATTTCCTTTCTACTCTGCGTAAGCCCACTCAGAGTTATGTGGCGTGTGCTGAAGCTAATATGATTTATAGCTCTGTCGAGCAAACAGAGCAGAAAAAGAGCGAAGTGCTA…	chr2H:119894142-119902230	Horvu_IGRI_2H01G220300	ATGCGGCGGAGCAAGGAGACCGTGGCGCCACCCGCCGCTTTCCCCAGTCCTCTCCTCCTCTCCGCCCCGCTCCAAAAACCACAGTGCCGCGCTTCGCCGCCGTCAGCGGCCATGGACGTCGCCCCCGGCGAGGCGGCGCCCTCTGGCATGTATTACCACACAAAAAGGAAGCCTTCTGACCCCATCAGTGGCCTTTCACTTCCTGGTGCAAAGATGGTTGGCAATTGGGGATTTGGCAGTGTTACCAAGGACTGGGAAAGTGTGAATGCTCGGAAGTTCCAATTTATAAATTTCCTTTCTACTCTGCGTAAGCCCACTCAGAGTTATGTGGCGTGTGCTGAAGCTAATATGATTTATAGCTCTGTCGAGCAAACAGAGCAGAAAAAGAGCGAAGTGCTA…	chr2H:116185648-116193737	Horvu_OUN333_2H01G215500	ATGCGGCGGAGCAAGGAGACCGTGGCGCCACCCGCCGCTTTCCCCAGTCCTCTCCTCCTCTCCGCCCCGCTCCAAAAACCACAGTGCCGCGCTTCGCCGCCGTCAGCGGCCATGGACGTCGCCCCCGGCGAGGCGGCGCCCTCTGGCATGTATTACCACACAAAAAGGAAGCCTTCTGACCCCATCAGTGGCCTTTCACTTCCTGGTGCAAAGATGGTTGGCAATTGGGGATTTGGCAGTGTTACCAAGGACTGGGAAAGTGTGAATGCTCGGAAGTTCCAATTTATAAATTTCCTTTCTACTCTGCGTAAGCCCACTCAGAGTTATGTGGCGTGTGCTGAAGCTAATATGATTTATAGCTCTGTCGAGCAAACAGAGCAGAAAAAGAGCGAAGTGCTA…	chr2H:124102863-124111486
	DRD1_6	HORVU.MOREX.r3.5HG0501840	ATGGACGTTGCCCCCGGCGAAGACCCCCCAGCAGACCCCTCCGGTATGTATTACCGCAGAAAAAGGAATCGTCCCGACCCCATCAATAATCTTTCAATTACTGGAAATAGGGTTCACAGTTGGGGATGTGGCAGTGTTACCAAGGAGTGGGACAGGGTGTATGCTCAGAAGGTCCAATTATTAACTTTCCTTTCTACTCTGCCCGAGTCTGCTCTGAGTTATGGGCCGAGTGCTGAAACTAATATGGCCAATTCTATCGAGCAAAGAGAACAGAAAGAGAGTGCAATAATAGTTCTTGATTCGGATGATGAAGATGAAAGCACAGGAGCACACAAACAACTGACGCCTGAGAAAAACAATCAGCTCACACCTGAGAAAAATAAACAGATGATACCATCA…	chr5:508164314-508170993	Horvu_AKASHIN_5H01G472500	ATGTATTACCGCAGAAAAAGGAATCGTCCCGACCCCATCAATAATCTTTCAATTACTGGAAATAGGGTTCACAGTTGGGGATGTGGCAGTGTTACCAAGGAGTGGGACAGGGTGTATGCTCAGAAGGTCCAATTATTAACTTTCCTTTCTACTCTGCCCGAGTCTGCTCTGAGTTATGGGCCGAGTGCTGAAACTAATATGGCCAATTCTGTCGAGCAAAGAGAACAGAAAGAGAGTGCAATAATAGTTCTTGATTCGGATGATGAAGATGAAAGCACAGGAGCACACAAACAACTGACGCCTGAGAAAAACAATCAGCTCACACCTGAGAAAAATAAACAGATGATACCATCAGAACAGGCTGGTGCTCTCATGAGGGTGGTAACCGAAGGAATTGAT…	chr5H:534360260-534364190	Horvu_BARKE_5H01G492700	ATGTATTACCGCAGAAAAAGGAATCGTCCCGACCCCATCAATAATCTTTCAATTACTGGAAATAGGGTTCACAGTTGGGGATGTGGCAGTGTTACCAAGGAGTGGGACAGGGTGTATGCTCAGAAGGTCCAATTATTAACTTTCCTTTCTACTCTGCCCGAGTCTGCTCTGAGTTATGGGCCGAGTGCTGAAACTAATATGGCCAATTCTATCGAGCAAAGAGAACAGAAAGAGAGTGCAATAATAGTTCTTGATTCGGATGATGAAGATGAAAGCACAGGAGCACACAAACAACTGACGCCTGAGAAAAACAATCAGCTCACACCTGAGAAAAATAAACAGATGATACCATCAGAACAGGCTGGTGCTCTCATGAGGGTGGTAACCGAAGGAATTGAT…	chr5H:512702413-512706343	Horvu_GOLDEN_5H01G447500	ATGTATTACCGCAGAAAAAGGAATCGTCCCGACCCCATCAATAATCTTTCAATTACTGGAAATAGGGTTCACAGTTGGGGATGTGGCAGTGTTACCAAGGAGTGGGACAGGGTGTATGCTCAGAAGGTCCAATTATTAACTTTCCTTTCTACTCTGCCCGAGTCTGCTCTGAGTTATGGGCCGAGTGCTGAAACTAATATGGCCAATTCTATCGAGCAAAGAGAACAGAAAGAGAGTGCAATAATAGTTCTTGATTCGGATGATGAAGATGAAAGCACAGGAGCACACAAACAACTGACGCCTGAGAAAAACAATCAGCTCACACCTGAGAAAAATAAACAGATGATACCATCAGAACAGGCTGGTGCTCTCATGAGGGTGGTAACCGAAGGAATTGAT…	chr5H:473353211-473357141	Horvu_HOCKETT_5H01G470100	ATGTATTACCGCAGAAAAAGGAATCGTCCCGACCCCATCAATAATCTTTCAATTACTGGAAATAGGGTTCACAGTTGGGGATGTGGCAGTGTTACCAAGGAGTGGGACAGGGTGTATGCTCAGAAGGTCCAATTATTAACTTTCCTTTCTACTCTGCCCGAGTCTGCTCTGAGTTATGGGCCGAGTGCTGAAACTAATATGGCCAATTCTATCGAGCAAAGAGAACAGAAAGAGAGTGCAATAATAGTTCTTGATTCGGATGATGAAGATGAAAGCACAGGAGCACACAAACAACTGACGCCTGAGAAAAACAATCAGCTCACACCTGAGAAAAATAAACAGATGATACCATCAGAACAGGCTGGTGCTCTCATGAGGGTGGTAACCGAAGGAATTGAT…	chr5H:492348284-492352214	Horvu_10350_5H01G490900	ATGTATTACCGCAGAAAAAGGAATCGTCCCGACCCCATCAATAATCTTTCAATTACTGGAAATAGGGTTCACAGTTGGGGATGTGGCAGTGTTACCAAGGAGTGGGACAGGGTGTATGCTCAGAAGGTCCAATTATTAACTTTCCTTTCTACTCTGCCCGAGTCTGCTCTGAGTTATGGGCCGAGTGCTGAAACTAATATGGCCAATTCTGTCGAGCAAAGAGAACAGAAAGAGAGTGCAATAATAGTTCTTGATTCGGATGATGAAGATGAAAGCACAGGAGCACACAAACAACTGACGCCTGAGAAAAACAATCAGCTCACACCTGAGAAAAATAAACAGATGATACCATCAGAACAGGCTGGTGCTCTCATGAGGGTGGTAACCGAAGGAATTGAT…	chr5H:503394017-503397947	Horvu_13821_5H01G474200	ATGTATTACCGCAGAAAAAGGAATCGTCCCGACCCCATCAATAATCTTTCAATTACTGGAAATAGGGTTCACAGTTGGGGATGTGGCAGTGTTACCAAGGAGTGGGACAGGGTATATGCTCAGAAGGTCCAATTATTAACTTTCCTTTCTACTCTGCCCGAGTCTGCTCTGAGTTATGGGCCGAGTGCTGAAACTAATATGGCCAATTCTATCGAGCAAAGAGAACAGAAAGAGAGTGCAATAATAGTTCTTGATTCGGATGATGAAGATGAAAGCACAGGAGCACACAAACAACTGACGCCTGAGAAAAACAATCAGCTCACACCTGAGAAAAATAAACAGATGATACCATCAGAACAGGCTGGTGCTCTCATGAGGGTGGTAACCGAAGGAATTGAT…	chr5H:527211944-527215870	Horvu_13942_5H01G471800	ATGTATTACCGCAGAAAAAGGAATCGTCCCGACCCCATCAATAATCTTTCAATTACTGGAAATAGGGTTCACAGTTGGGGATGTGGCAGTGTTACCAAGGAGTGGGACAGGGTGTATGCTCAGAAGGTCCAATTATTAACTTTCCTTTCTACTCTGCCCGAGTCTGCTCTGAGTTATGGGCCGAGTGCTGAAACTAATATGGCCAATTCTGTCGAGCAAAGAGAACAGAAAGAGAGTGCAATAATAGTTCTTGATTCGGATGATGAAGATGAAAGCACAGGAGCACACAAACAACTGACGCCTGAGAAAAACAATCAGCTCACACCTGAGAAAAATAAACAGATGATACCATCAGAACAGGCTGGTGCTCTCATGAGGGTGGTAACCGAAGGAATTGAT…	chr5H:520731428-520735358	Horvu_21599_5H01G470900	ATGTATTACCGCAGAAAAAGGAATCGTCCTGACCCCATCAATAATCTTTCAATTACTGGAAATAGGGTTCACAGTTGGGGATGTGGCAGTGTTACCAAGGAGTGGGACAGGGTGTATGCTCAGAAGGTCCAATTATTAACTTTCCTTTCTACTCTGCCCGAGTCTGCTCTGAGTTATGGGCCGAGTGCTGAAACTAATATGGCCAATTCTATCGAGCAAAGAGAACAGAAAGAGAGTGCAATAATAGTTCTTGATTCGGATGATGAAGATGAAAGCACAGGAGCACACAAACAACTGACGCCTGAGAAAAACAATCAGCTCACACCTGAGAAAAATAAACAGATGATACCATCAGAACAGGCTGGTGCTCTCATGAGGGTGGTAACCGAAGGAATTGAT…	chr5H:524977424-524981358	Horvu_3081_5H01G483200	ATGTATTACCGCAGAAAAAGGAATCGTCCCGACCCCATCAATAATCTTTCAATTACTGGAAATAGGGTTCACAGTTGGGGATGTGGCAGTGTTACCAAGGAGTGGGACAGGGTGTATGCTCAGAAGGTCCAATTATTAACTTTCCTTTCTACTCTGCCCGAGTCTGCTCTGAGTTATGGGCCGAGTGCTGAAACTAATATGGCCAATTCTGTCGAGCAAAGAGAACAGAAAGAGAGTGCAATAATAGTTCTTGATTCGGATGATGAAGATGAAAGCACAGGAGCACACAAACAACTGACGCCTGAGAAAAACAATCAGCTCACACCTGAGAAAAATAAACAGATGATACCATCAGAACAGGCTGGTGCTCTCATGAGGGTGGTAACCGAAGGAATTGAT…	chr5H:514269854-514273784	Horvu_HHOR_5H01G475400	ATGTATTACCGCAGAAAAAGGAATCGTCCCGACCCCATCAATAATCTTTCAATTACTGGAAATAGGGTTCACAGTTGGGGATGTGGCAGTGTTACCAAGGAGTGGGACAGGGTGTATGCTCAGAAGGTCCAATTATTAACTTTCCTTTCTACTCTGCCCGAGTCTGCTCTGAGTTATGGGCCGAGTGCTGAAACTAATATGGCCAATTCTATCGAGCAAAGAGAACAGAAAGAGAGTGCAATAATAGTTCTTGATTCGGATGATGAAGATGAAAGCACAGGAGCACACAAACAACTGACGCCTGAGAAAAACAATCAGCTCACACCTGAGAAAAATAAACAGATGATACCATCAGAACAGGCTGGTGCTCTCATGAGGGTGGTAACCGAAGGAATTGAT…	chr5H:546378861-546382789	Horvu_7552_5H01G475900	ATGTATTACCGCAGAAAAAGGAATCGTCCCGACCCCATCAATAATCTTTCAATTACTGGAAATAGGGTTCACAGTTGGGGATGTGGCAGTGTTACCAAGGAGTGGGACAGGGTGTATGCTCAGAAGGTCCAATTATTAACTTTCCTTTCTGCTCTACCCGAGTCTGCTCTGAGTTATGGGCCGAGTGCTGAAACTAATATGGCCAATTCTATCGAGCAAAGAGAACAGAAAGAGAGTGCAATAATAGTTCTTGATTCGGATGATGAAGATGAAAGCAGAGGAGCACACAAACAACTGACGCCTGAGAAAAACAATCAGCTCACACCTGAGAAAAATAAACAGATGATACCATCAGAACAGGCTGGTGCTCTCATGAGGGTGGTAACCGAAGGAATTGAT…	chr5H:515091235-515095165	Horvu_8148_5H01G484700	ATGTATTACCGCAGAAAAAAGAATCGTCCCGACCCCATCAATAATCTTTCAATTACTGGAAATAGGGTTCACAGTTGGGGATGTGGCAGTGTTACCAAGGAGTGGGACAGGGTGTATGCTCAGAAGGTCCAATTATTAACTTTCCTTTCTACTCTGCCCGAGTCTGCTCTGAGTTATGGGCCGAGTGCTGAAACTAATATGGCCAATTCTATCGAGCAAAGAGAACAGAAAGAGAGTGCAATAATAGTTCTTGATTCGGATGATGAAGATGAAAGCACAGGAGCACACAAACAACTGACGCCTGAGAAAAACAATCAGCTCACACCTGAGAAAAATAAACAGATGATACCATCAGAACAGGCTGGTGCTCTCATGAGGGTGGTAACCGAAGGAATTGAT…	chr5H:517478214-517482141	Horvu_9043_5H01G481100	ATGTATTACCGCAGAAAAAGGAATCGTCCCGACCCCATCAATAATCTTTCAATTACTGGAAATAGGGTTCACAGTTGGGGATGTGGCAGTGTTACCAAGGAGTGGGACAGGGTGTATGCTCAGAAGGTCCAATTATTAACTTTCCTTTCTACTCTGCCCGAGTCTGCTCTGAGTTATGGGCCGAGTGCTGAAACTAATATGGCCAATTCTGTCGAGCAAAGAGAACAGAAAGAGAGTGCAATAATAGTTCTTGATTCGGATGATGAAGATGAAAGCACAGGAGCACACAAACAACTGACGCCTGAGAAAAACAATCAGCTCACACCTGAGAAAAATAAACAGATGATACCATCAGAACAGGCTGGTGCTCTCATGAGGGTGGTAACCGAAGGAATTGAT…	chr5H:518490490-518494420	Horvu_IGRI_5H01G484500	ATGTATTACCGCAGAAAAAGGAATCGTCCCGACCCCATCAATAATCTTTCAATTACTGGAAATAGGGTTCACAGTTGGGGATGTGGCAGTGTTACCAAGGAGTGGGACAGGGTGTATGCTCAGAAGGTCCAATTATTAACTTTCCTTTCTACTCTGCCCGAGTCTGCTCTGAGTTATGGGCCGAGTGCTGAAACTAATATGGCCAATTCTGTCGAGCAAAGAGAACAGAAAGAGAGTGCAATAATAGTTCTTGATTCGGATGATGAAGATGAAAGCACAGGAGCACACAAACAACTGACGCCTGAGAAAAACAATCAGCTCACACCTGAGAAAAATAAACAGATGATACCATCAGAACAGGCTGGTGCTCTCATGAGGGTGGTAACCGAAGGAATTGAT…	chr5H:519099010-519102940	Horvu_OUN333_5H01G478800	ATGTATTACCGCAGAAAAAGGAATCGTCCCGACCCCATCAATAATCTTTCAATTACTGGAAATAGGGTTCACAGTTGGGGATGTGGCAGTGTTACCAAGGAGTGGGACAGGGTGTATGCTCAGAAGGTCCAATTATTAACTTTCCTTTCTACTCTGCCCGAGTCTGCTCTGAGTTATGGGCCGAGTGCTGAAACTAATATGGCCAATTCTGTCGAGCAAAGAGAACAGAAAGAGAGTGCAATAATAGTTCTTGATTCGGATGATGAAGATGAAAGCACAGGAGCACACAAACAACTGACGCCTGAGAAAAACAATCAGCTCACACCTGAGAAAAATAAACAGATGATACCATCAGAACAGGCTGGTGCTCTCATGAGGGTGGTAACCGAAGGAATTGAT…	chr5H:530074830-530078760
	DRD1_7	N/A	N/A	chr6:403369542-403373352	Horvu_AKASHIN_6H01G339200	ATGTGGCTCGTCGAGGAGGCCGACACCACCACCCCACCTCCCGGCCGGGGTCTCAGTAAGCGGACACGGTCGCACCTGAGCTGCTCCAACAAGAAACTGCTGAAACTTGGTTCTGTAACCAAGCCGGTCCTGCTGGACACATCTTCCTCCGGCTCCGAGTCCGAGCCAGAGGAAGTCGTGCCACCGCCTCAGCCATCCAGCTGGGCGGCCGAGGACGGCAGCGCCGGCGAAGGCAGAAGGCCGGCGAAGAAGAAGACGAGACGGTGCTGGCAGCAGATCGCCCAAGGCGGGCGCTCAGAGAATGACAACAGCGACGACCCTGACGACGACAGAACGCCGCCAAGGAAGGCCAGGAAGGGGCCGAGCTCAAGCAAGCCGAAGATTGGAGCGTCGAACCGG…	chr6H:414248856-414252666	Horvu_BARKE_6H01G355400	ATGTGGCTCGTCGAGGAGGCCGACACCACCACCCCACCTCCCGGCCGGGGTCTCAGTAAGCGGACACGGTCGCACCTGAGCTGCTCCAACAAGAAACTGCTGAAACTTGGTTCTGTAACCAAGCCGGTCCTGCTGGACACATCTTCCTCCGGCTCCGAGTCCGAGCCAGAGGAAGTCGTGCCACCGCCTCAGCCATCCAGCTGGGCGGCCGAGGACGGCAGCGCCGGCGAAGGCAGAAGGCCGGCGAAGAAGAAGACGAGACGGTGCTGGCAGCAGATCGCCCAAGGCGGGCGCTCAGAGAATGACAACAGCGACGACCCTGACGACGACAGAACGCCGCCAAGGAAGGCCAGGAAGGGGCCGAGCTCAAGCAAGCCGAAGATTGGAGCGTCGAACCGG…	chr6H:392711113-392714923	Horvu_GOLDEN_6H01G317200	ATGTGGCTCGTCGAGGAGGCCGACACCACCACCCCACCTCCCGGCCGGGGTCTCAGTAAGCGGACACGGTCGCACCTGAGCTGCTCCAACAAGAAACTGCTGAAACTTGGTTCTGTAACCAAGCCGGTCCTGCTGGACACATCTTCCTCCGGCTCCGAGTCCGAGCCAGAGGAAGTCGTGCCACCGCCTCAGCCATCCAGCTGGGCGGCCGAGGACGGCAGCGCCGGCGAAGGCAGAAGGCCGGCGAAGAAGAAGACGAGACGGTGCTGGCAGCAGATCGCCCAAGGCGGGCGCTCAGAGAATGACAACAGCGACGACCCTGACGACGACAGAACGCCGCCAAGGAAGGCCAGGAAGGGGCCGAGCTCAAGCAAGCCGAAGATTGGAGCGTCGAACCGG…	chr6H:370734931-370738741	Horvu_HOCKETT_6H01G330800	ATGTGGCTCGTCGAGGAGGCCGACACCACCACCCCACCTCCCGGCCGGGGTCTCAGTAAGCGGACACGGTCGCACCTGAGCTGCTCCAACAAGAAACTGCTGAAACTTGGTTCTGTAACCAAGCCGGTCCTGCTGGACACATCTTCCTCCGGCTCCGAGTCCGAGCCAGAGGAAGTCGTGCCACCGCCTCAGCCATCCAGCTGGGCGGCCGAGGACGGCAGCGCCGGCGAAGGCAGAAGGCCGGCGAAGAAGAAGACGAGACGGTGCTGGCAGCAGATCGCCCAAGGCGGGCGCTCAGAGAATGACAACAGCGACGACCCTGACGACGACAGAACGCCGCCAAGGAAGGCCAGGAAGGGGCCGAGCTCAAGCAAGCCGAAGATTGGAGCGTCGAACCGG…	chr6H:384153136-384156946	Horvu_10350_6H01G352900	ATGTGGCTCGTCGAGGAGGCCGACACCACCACCCCACCTCCCGGCCGGGGTCTCAGTAAGCGGACACGGTCGCACCTGAGCTGCTCCAACAAGAAACTGCTGAAACTTGGTTCTGTAACCAAGCCGGTCCTGCTGGACACATCTTCCTCCGGCTCCGAGTCCGAGCCAGAGGAAGTCGTGCCACCGCCTCAGCCATCCAGCTGGGCGGCCGAGGACGGCAGCGCCGGCGAAGGCAGAAGGCCGGCGAAGAAGAAGACGAGACGGTGCTGGCAGCAGATCGCCCAAGGCGGGCGCTCAGAGAATGACAACAGCGACGACCCTGACGACGACAGAACGCCGCCAAGGAAGGCCAGGAAGGGGCCGAGCTCAAGCAAGCCGAAGATTGGAGCGTCGAACCGG…	chr6H:397754569-397758379	Horvu_13821_6H01G344400	ATGTGGCTCGTCGAGGAGGCCGACACCACCACCCCACCTCCCGGCCGGGGTCTCAGTAAGCGGACACGGTCGCACCTGAGCTGCTCCAACAAGAAACTGCTGAAACTTGGTTCTGTAACCAAGCCGGTCCTGCTGGACACATCTTCCTCCGGCTCCGAGTCCGAGCCAGAGGAAGTCGTGCCACCGCCTCAGCCATCCAGCTGGGCGGCCGAGGACGGCAGCGCCGGCGAAGGCAGAAGGCCGGCGAAGAAGAAGACGAGACGGTGCTGGCAGCAGATCGCCCAAGGCGGGCGCTCAGAGAATGACAACAGCGACGACCCTGACGACGACAGAACGCCGCCAAGGAAGGCCAGGAAGGGGCCGAGCTCAAGCAAGCCGAAGATTGGAGCGTCGAACCGG…	chr6H:413295853-413299663	N/A	N/A	chr6H:398530353-398534163	Horvu_21599_6H01G348200	ATGTGGCTCGTCGAGGAGGCCGACACCACCACCCCACCTCCCGGCCGGGGTCTCAGTAAGCGGACACGGTCGCACCTGAGCTGCTCCAACAAGAAACTGCTGAAACTTGGTTCTGTAACCAAGCCGGTCCTGCTGGACACATCTTCCTCCGGCTCCGAGTCCGAGCCAGAGGAAGTCGTGCCACCGCCTCAGCCATCCAGCTGGGCGGCCGAGGACGGCAGCGCCGGCGAAGGCAGAAGGCCGGCGAAGAAGAAGACGAGACGGTGCTGGCAGCAGATCGCCCAAGGCGGGCGCTCAGAGAATGACAACAGCGACGACCCTGACGACGACAGAACGCCGCCAAGGAAGGCCAGGAAGGGGCCGAGCTCAAGCAAGCCGAAGATTGGAGCGTCGAACCGG…	chr6H:415727435-415731245	Horvu_3081_6H01G349000	ATGTGGCTCGTCGAGGAGGCCGACACCACCACCCCACCTCCCGGCCGGGGTCTCAGTAAGCGGACACGGTCGCACCTGAGCTGCTCCAACAAGAAACTGCTGAAACTTGGTTCTGTAACCAAGCCGGTCCTGCTGGACACATCTTCCTCCGGCTCCGAGTCCGAGCCAGAGGAAGTCGTGCCACCGCCTCAGCCATCCAGCTGGGCGGCCGAGGACGGCAGCGCCGGCAAAGGCAGAAGGCCGGCGAAGAAGAAGACGAGACGGTGCTGGCAGCAGATCGCCCAAGGCGGGCGCTCAGAGAATGACAACAGCGACGACCCTGACGACGACAGAACGCCGCCAAGGAAGGCCAGGAAGGGGCCGAGCTCAAGCAAGCCGAAGATTGGAGCGTCGAACCGG…	chr6H:403756879-403760689	Horvu_HHOR_6H01G338500	ATGTGGCTCGTCGAGGAGGCCGACACCACCACCCCACCTCCCGGCCGGGGTCTCAGTAAGCGGACACGGTCGCACCTGAGCTGCTCCAACAAGAAACTGCTGAAACTTGGTTCTGTAACCAAGCCGGTCCTGCTGGACACATCTTCCTCCGGCTCCGAGTCCGAGCCAGAGGAAGTCGTGCCACCGCCTCAGCCATCCAGCTGGGCGGCCGAGGACGGCAGCGCCGGCGAAGGCAGAAGGCCGGCGAAGAAGAAGACGAGACGGTGCTGGCAGCAGATCGCCCAAGGCGGGCGCTCAGAGAATGACAACAGCGACGACCCTGACGACGACAGAACGCCGCCAAGGAAGGCCAGGAAGGGGCCGAGCTCAAGCAAGCCGAAGATTGGAGCGTCGAACCGG…	chr6H:425786110-425789920	Horvu_7552_6H01G343800	ATGTGGCTCGTCGAGGAGGCCGACACCACCACCCCACCTCCCGGCCGGGGTCTCAGTAAGCGGACACGGTCGCACCTGAGCTGCTCCAACAAGAAACTGCTGAAACTTGGTTCTGTAACCAAGCCGGTCCTGCTGGACACATCTTCCTCCGGCTCCGAGTCCGAGCCAGAGGAAGTCGTGCCACCGCCTCAGCCATCCAGCTGGGCGGCCGAGGACGGCAGCGCCGGCGAAGGCAGAAGGCCGGCGAAGAAGAAGACGAGACGGTGCTGGCAGCAGATCGCCCAAGGCGGGCGCTCAGAGAATGACAACAGCGACGATCCTGACGACGACAGAACGCCGCCAAGGAAGGCCAGGAAGGGGCCGAGCTCAAGCAAGCCGAAGATTGGAGCGTCGAACCGG…	chr6H:402564454-402568264	Horvu_8148_6H01G351300	ATGTGGCTCGTCGAGGAGGCCGACACCACCACCCCACCTCCCGGCCGGGGTCTCAGTAAGCGGACACGGTCGCACCTGAGCTGCTCCAACAAGAAACTGCTGAAACTTGGTTCTGTAACCAAGCCGGTCCTGCTGGACACATCTTCCTCCGGCTCCGAGTCCGAGCCAGAGGAAGTCGTGCCACCGCCTCAGCCATCCAGCTGGGCGGCCGAGGACGGCAGCGCCGGCGAAGGCAGAAGGCCGGCGAAGAAGAAGACGAGACGGTGCTGGCAGCAGATCGCCCAAGGCGGGCGCTCAGAGAATGACAACAGCGACGACCCTGACGACGACAGAACGCCGCCAAGGAAGGCCAGGAAGGGGCCGAGCTCAAGCAAGCCGAAGATTGGAGCGTCGAACCGG…	chr6H:405431334-405435145	Horvu_9043_6H01G344500	ATGTGGCTCGTCGAGGAGGCCGACACCACCACCCCACCTCCCGGCCGGGGTCTCAGTAAGCGGACACGGTCGCACCTGAGCTGCTCCAACAAGAAACTGCTGAAACTTGGTTCTGTAACCAAGCCGGTCCTGCTGGACACATCTTCCTCCGGCTCCGAGTCCGAGCCAGAGGAAGTCGTGCCACCGCCTCAGCCATCCAGCTGGGCGGCCGAGGACGGCAGCGCCGGCGAAGGCAGAAGGCCGGCGAAGAAGAAGACGAGACGGTGCTGGCAGCAGATCGCCCAAGGCGGGCGCTCAGAGAATGACAACAGCGACGACCCTGACGACGACAGAACGCCGCCAAGGAAGGCCAGGAAGGGGCCGAGCTCAAGCAAGCCGAAGATTGGAGCGTCGAACCGG…	chr6H:406945317-406949127	Horvu_IGRI_6H01G347000	ATGTGGCTCGTCGAGGAGGCCGACACCACCACCCCACCTCCCGGCCGGGGTCTCAGTAAGCGGACACGGTCGCACCTGAGCTGCTCCAACAAGAAACTGCTGAAACTTGGTTCTGTAACCAAGCCGGTCCTGCTGGACACATCTTCCTCCGGCTCCGAGTCCGAGCCAGAGGAAGTCGTGCCACCGCCTCAGCCATCCAGCTGGGCGGCCGAGGACGGCAGCGCCGGCGAAGGCAGAAGGCCGGCGAAGAAGAAGACGAGACGGTGCTGGCAGCAGATCGCCCAAGGCGGGCGCTCAGAGAATGACAACAGCGACGACCCTGACGACGACAGAACGCCGCCAAGGAAGGCCAGGAAGGGGCCGAGCTCAAGCAAGCCGAAGATTGGAGCGTCGAACCGG…	chr6H:400213046-400216856	Horvu_OUN333_6H01G347400	ATGTGGCTCGTCGAGGAGGCCGACACCACCACCCCACCTCCCGGCCGGGGTCTCAGTAAGCGGACACGGTCGCACCTGAGCTGCTCCAACAAGAAACTGCTGAAACTTGGTTCTGTAACCAAGCCGGTCCTGCTGGACACATCTTCCTCCGGCTCCGAGTCCGAGCCAGAGGAAGTCGTGCCACCGCCTCAGCCATCCAGCTGGGCGGCCGAGGACGGCAGCGCCGGCGAAGGCAGAAGGCCGGCGAAGAAGAAGACGAGACGGTGCTGGCAGCAGATCGCCCAAGGCGGGCGCTCAGAGAATGACAACAGCGACGATCCTGACGACGACAGAACGCCGCCAAGGAAGGCCAGGAAGGGGCCGAGCTCAAGCAAGCCGAAGATTGGAGCGTCGAACCGG…	chr6H:419115151-419118961
Rad5/16-like	Rad5_16_1	HORVU.MOREX.r3.2HG0119710	ATGGCCTCCTCCTCCTCCTCCCGCGGGGGCGGCGGTGACGACGACAACGAGCCCTACCTCGTGGGATTCGTCGTCGCCAAGATCGTCGGCCTCAAGTACTACACCGGCACCCTCAGCGGCGGCGAGAGGCCCTCCCTCGTCCGCGAGCCCCTCAACCGCTTCGACAGCAACGCCATCGCCGTCCACAACAGCCGCGGCCAACAGGTCGGCCACATCGAGGGCCGCACCGCCAAGGTCCTCGCCCCGCTCCTCGACTCCCACCTCGTCGCCAACACCCTCGTCGTCGTGCCCGACGGCCGGTCCTCCAAGGCCGGCACCAGTTTCTACAAGCTTCCCTGCCAGATCCACCTCTTCGCCCGCCCGGCCGCCGCGGACATCGTCCGCGAGGCCATCGACGGC…	chr2:68250274-68254466	Horvu_AKASHIN_2H01G160700	ATGGCCTCCTCCTCCTCCTCCCGCGGGGGCGGCGGTGACGACGACAACGAGCCCTACCTCGTGGGATTCGTCGTCGCCAAGATCGTCGGCCTCAAGTACTACACCGGCACCCTCAGCGGCGGCGAGAGGCCCTCCCTCGTCCGCGAGCCCCTCAACCGCTTCGACAGCAACGCCATCGCCGTCCACAACAGCCGCGGCCGACAGGTCGGCCACATCGAGGGCCGCACCGCCAAGGTCCTCGCCCCGCTCCTCGACTCCCACCTCGTCGCCAACACCCTCGTCGTCGTGCCCGACGGCCGGTCCTCCAAGGCCGGCACCAGTTTCTACAAGCTTCCCTGCCAGATCCACCTCTTCGCCCGCCCGGCCGCCGCGGACATCGTCCGCGAGGCCATCGACGGC…	chr2H:69682210-69686399	Horvu_BARKE_2H01G170500	ATGGCCTCCTCCTCCTCCTCCCGCGGGGGCGGCGGTGACGACGACAACGAGCCCTACCTCGTGGGATTCGTCGTCGCCAAGATCGTCGGCCTCAAGTACTACACCGGCACCCTCAGCGGCGGCGAGAGGCCCTCCCTCGTCCGCGAGCCCCTCAACCGCTTCGACAGCAACGCCATCGCCGTCCACAACAGCCGCGGCCGACAGGTCGGCCACATCGAGGGCCGCACCGCCAAGGTCCTCGCCCCGCTCCTCGACTCCCACCTCGTCGCCAACACCCTCGTCGTCGTGCCCGACGGCCGGTCCTCCAAGGCCGGCACCAGTTTCTACAAGCTTCCCTGCCAGATCCACCTCTTCGCCCGCCCGGCCGCCGCGGACATCGTCCGCGAGGCCATCGACGGC…	chr2H:64656112-64660303	Horvu_GOLDEN_2H01G139800	ATGGCCTCCTCCTCCTCCTCCCGCGGGGGCGGCGGTGACGACGACAACGAGCCCTACCTCGTGGGATTCGTCGTCGCCAAGATCGTCGGCCTCAAGTACTACACCGGCACCCTCAGCGGCGGCGAGAGGCCCTCCCTCGTCCGCGAGCCCCTCAACCGCTTCGACAGCAACGCCATCGCCGTCCACAACAGCCGCGGCCGACAGGTCGGCCACATCGAGGGCCGCACCGCCAAGGTCCTCGCCCCGCTCCTCGACTCCCACCTCGTCGCCAACACCCTCGTCGTCGTGCCCGACGGCCGGTCCTCCAAGGCCGGCACCAGTTTCTACAAGCTTCCCTGCCAGATCCACCTCTTCGCCCGCCCGGCCGCCGCGGACATCGTCCGCGAGGCCATCGACGGC…	chr2H:53695244-53699435	Horvu_HOCKETT_2H01G145000	ATGGCCTCCTCCTCCTCCTCCCGCGGGGGCGGCGGTGACGACGACAACGAGCCCTACCTCGTGGGATTCGTCGTCGCCAAGATCGTCGGCCTCAAGTACTACACCGGCACCCTCAGCGGCGGCGAGAGGCCCTCCCTCGTCCGCGAGCCCCTCAACCGCTTCGACAGCAACGCCATCGCCGTCCACAACAGCCGCGGCCGACAGGTCGGCCACATCGAGGGCCGCACCGCCAAGGTCCTCGCCCCGCTCCTCGACTCCCACCTCGTCGCCAACACCCTCGTCGTCGTGCCCGACGGCCGGTCCTCCAAGGCCGGCACCAGTTTCTACAAGCTTCCCTGCCAGATCCACCTCTTCGCCCGCCCGGCCGCCGCGGACATCGTCCGCGAGGCCATCGACGGC…	chr2H:57768013-57772204	Horvu_10350_2H01G166600	ATGGCCTCCTCCTCCTCCTCCCGCGGGGGCGGCGGTGACGACGACAACGAGCCCTACCTCGTGGGATTCGTCGTCGCCAAGATCGTCGGCCTCAAGTACTACACCGGCACCCTCAGCGGCGGCGAGAGGCCCTCCCTCGTCCGCGAGCCCCTCAACCGCTTCGACAGCAACGCCATCGCCGTCCACAACAGCCGCGGCCGACAGGTCGGCCACATCGAGGGCCGCACCGCCAAGGTCCTCGCCCCGCTCCTCGACTCCCACCTCGTCGCCAACACCCTCGTCGTCGTGCCCGACGGCCGGTCCTCCAAGGCCGGCACCAGTTTCTACAAGCTTCCCTGCCAGATCCACCTCTTCGCCCGCCCGGCCGCCGCGGACATCGTCCGCGAGGCCATCGACGGC…	chr2H:65136315-65140506	Horvu_13821_2H01G163400	ATGGCCTCCTCCTCCTCCTCCCGCGGGGGCGGCGGTGACGACGACAACGAGCCCTACCTCGTGGGATTCGTCGTCGCCAAGATCGTCGGCCTCAAGTACTACACCGGCACCCTCAGCGGCGGCGAGAGGCCCTCCCTCGTCCGCGAGCCCCTCAACCGCTTCGACAGCAACGCCATCGCCGTCCACAACAGCCGCGGCCGACAGGTCGGCCACATCGAGGGCCGCACCGCCAAGGTCCTCGCCCCGCTCCTCGACTCCCACCTCGTCGCCAACACCCTCGTCGTCGTGCCCGACGGCCGGTCCTCCAAGGCCGGCACCAGTTTCTACAAGCTTCCCTGCCAGATCCACCTCTTCGCCCGCCCGGCCGCCGCGGACATCGTCCGCGAGGCCATCGACGGC…	chr2H:68803681-68807870	Horvu_13942_2H01G162700	ATGGCCTCCTCCTCCTCCTCCCGCGGGGGCGGCGGTGACGACGACAACGAGCCCTACCTCGTGGGATTCGTCGTCGCCAAGATCGTCGGCCTCAAGTACTACACCGGCACCCTCAGCGGCGGCGAGAGGCCCTCCCTCGTCCGCGAGCCCCTCAACCGCTTCGACAGCAACGCCATCGCCGTCCACAACAGCCGCGGCCGACAGGTCGGCCACATCGAGGGCCGCACCGCCAAGGTCCTCGCCCCGCTCCTCGACTCCCACCTCGTCGCCAACACCCTCGTCGTCGTGCCCGACGGCCGGTCCTCCAAGGCCGGCACCAGTTTCTACAAGCTTCCCTGCCAGATCCACCTCTTCGCCCGCCCGGCCGCCGCGGACATCGTCCGCGAGGCCATCGACGGC…	chr2H:65447360-65451549	Horvu_21599_2H01G160800	ATGGCCTCCTCCTCCTCCTCCCGCGGGGGCGGCGGTGACGACGACAACGAGCCCTACCTCGTGGGATTCGTCGTCGCCAAGATCGTCGGCCTCAAGTACTACACCGGCACCCTCAGCGGCGGCGAGAGGCCCTCCCTCGTCCGCGAGCCCCTCAACCGCTTCGACAGCAACGCCATCGCCGTCCACAACAGCCGCGGCCGACAGGTCGGCCACATCGAGGGCCGCACCGCCAAGGTCCTCGCCCCGCTCCTCGACTCCCACCTCGTCGCCAACACCCTCGTCGTCGTGCCCGACGGCCGGTCCTCCAAGGCCGGCACCAGTTTCTACAAGCTTCCCTGCCAGATCCACCTCTTCGCCCGCCCGGCCGCCGCGGACATCGTCCGCGAGGCCATCGACGGC…	chr2H:68699875-68704066	Horvu_3081_2H01G164300	ATGGCCTCCTCCTCCTCCTCCCGCGGGGGCGGCGGTGACGACGACAACGAGCCCTACCTCGTGGGATTCGTCGTCGCCAAGATCGTCGGCCTCAAGTACTACACCGGCACCCTCAGCGGCGGCGAGAGGCCCTCCCTCGTCCGCGAGCCCCTCAACCGCTTCGACAGCAACGCCATCGCCGTCCACAACAGCCGCGGCCAACAGGTCGGCCACATCGAGGGCCGCACCGCCAAGGTCCTCGCCCCGCTCCTCGACTCCCACCTCGTCGCCAACACCCTCGTCGTCGTGCCCGACGGCCGGTCCTCCAAGGCCGGCACCAGTTTCTACAAGCTTCCCTGCCAGATCCACCTCTTCGCCCGCCCGGCCGCCGCGGACATCGTCCGCGAGGCCATCGACGGC…	chr2H:65979379-65983571	Horvu_HHOR_2H01G158900	ATGGCCTCCTCCTCCTCCTCCCGCGGGGGCGGCGGTGACGACGACAACGAGCCCTACCTCGTGGGATTCGTCGTCGCCAAGATCGTCGGCCTCAAGTACTACACCGGCACCCTCAGCGGCGGCGAGAGGCCCTCCCTCGTCCGCGAGCCCCTCAACCGCTTCGACAGCAACGCCATCGCCGTCCACAACAGCCGCGGCCGACAGGTCGGCCACATCGAGGGCCGCACCGCCAAGGTCCTCGCCCCGCTCCTCGACTCCCACCTCGTCGCCAACACCCTCGTCGTCGTGCCCGACGGCCGGTCCTCCAAGGCCGGCACCAGTTTCTACAAGCTTCCCTGCCAGATCCACCTCTTCGCCCGCCCGGCCGCCGCGGACATCGTCCGCGAGGCCATCGACGGC…	chr2H:71273133-71277324	Horvu_7552_2H01G163100	ATGGCCTCCTCCTCCTCCTCCCGCGGGGGCGGCGGTGACGACGACAACGAGCCCTACCTCGTGGGATTCGTCGTCGCCAAGATCGTCGGCCTCAAGTACTACACCGGCACCCTCAGCGGCGGCGAGAGGCCCTCCCTCGTCCGCGAGCCCCTCAACCGCTTCGACAGCAACGCCATCGCCGTCCACAACAGCCGCGGCCGACAGGTCGGCCACATCGAGGGCCGCACCGCCAAGGTCCTCGCCCCGCTCCTCGACTCCCACCTCGTCGCCAACACCCTCGTCGTCGTGCCCGACGGCCGGTCCTCCAAGGCCGGCACCAGTTTCTACAAGCTTCCCTGCCAGATCCACCTCTTCGCCCGCCCGGCCGCCGCGGACATCGTCCGCGAGGCCATCGACGGC…	chr2H:64898732-64902923	Horvu_8148_2H01G166000	ATGGCCTCCTCCTCCTCCTCCCGCGGGGGCGGCGGTGACGACGACAACGAGCCCTACCTCGTGGGATTCGTCGTCGCCAAGATCGTCGGCCTCAAGTACTACACCGGCACCCTCAGCGGCGGCGAGAGGCCCTCCCTCGTCCGCGAGCCCCTCAACCGCTTCGACAGCAACGCCATCGCCGTCCACAACAGCCGCGGCCAACAGGTCGGCCACATCGAGGGCCGCACCGCCAAGGTCCTCGCCCCGCTCCTCGACTCCCACCTCGTCGCCAACACCCTCGTCGTCGTGCCCGACGGCCGGTCCTCCAAGGCCGGCACCAGTTTCTACAAGCTTCCCTGCCAGATCCACCTCTTCGCCCGCCCGGCCGCCGCGGACATCGTCCGCGAGGCCATCGACGGC…	chr2H:67210906-67215098	Horvu_9043_2H01G164000	ATGGCCTCCTCCTCCTCCTCCCGCGGGGGCGGCGGTGACGACGACAACGAGCCCTACCTCGTGGGATTCGTCGTCGCCAAGATCGTCGGCCTCAAGTACTACACCGGCACCCTCAGCGGCGGCGAGAGGCCCTCCCTCGTCCGCGAGCCCCTCAACCGCTTCGACAGCAACGCCATCGCCGTCCACAACAGCCGCGGCCGACAGGTCGGCCACATCGAGGGCCGCACCGCCAAGGTCCTCGCCCCGCTCCTCGACTCCCACCTCGTCGCCAACACCCTCGTCGTCGTGCCCGACGGCCGGTCCTCCAAGGCCGGCACCAGTTTCTACAAGCTTCCCTGCCAGATCCACCTCTTCGCCCGCCCGGCCGCCGCGGACATCGTCCGCGAGGCCATCGACGGC…	chr2H:67799468-67803657	Horvu_IGRI_2H01G163000	ATGGCCTCCTCCTCCTCCTCCCGCGGGGGCGGCGGTGACGACGACAACGAGCCCTACCTCGTGGGATTCGTCGTCGCCAAGATCGTCGGCCTCAAGTACTACACCGGCACCCTCAGCGGCGGCGAGAGGCCCTCCCTCGTCCGCGAGCCCCTCAACCGCTTCGACAGCAACGCCATCGCCGTCCACAACAGCCGCGGCCGACAGGTCGGCCACATCGAGGGCCGCACCGCCAAGGTCCTCGCCCCGCTCCTCGACTCCCACCTCGTCGCCAACACCCTCGTCGTCGTGCCCGACGGCCGGTCCTCCAAGGCCGGCACCAGTTTCTACAAGCTTCCCTGCCAGATCCACCTCTTCGCCCGCCCGGCCGCCGCGGACATCGTCCGCGAGGCCATCGACGGC…	chr2H:65046909-65051100	Horvu_OUN333_2H01G159000	ATGGCCTCCTCCTCCTCCTCCCGCGGGGGCGGCGGTGACGACGACAACGAGCCCTACCTCGTGGGATTCGTCGTCGCCAAGATCGTCGGCCTCAAGTACTACACCGGCACCCTCAGCGGCGGCGAGAGGCCCTCCCTCGTCCGCGAGCCCCTCAACCGCTTCGACAGCAACGCCATCGCCGTCCACAACAGCCGCGGCCGACAGGTCGGCCACATCGAGGGCCGCACCGCCAAGGTCCTCGCCCCGCTCCTCGACTCCCACCTCGTCGCCAACACCCTCGTCGTCGTGCCCGACGGCCGGTCCTCCAAGGCCGGCACCAGTTTCTACAAGCTTCCCTGCCAGATCCACCTCTTCGCCCGCCCGGCCGCCGCGGACATCGTCCGCGAGGCCATCGACGGC…	chr2H:70831628-70835819
	Rad5_16_2	HORVU.MOREX.r3.6HG0559070	ATGGCGAAGAAGAGCGAGAGGGCGGAGCAGGTGGCGGCGGTGCGCGCGGTGCTCGGCGAGGAGACGCCGGAGATGGACATCATCCGCGCGCTCCACATGGCCGGCGACGACCCCACCAAGACCATCAACATCCTCCTCGACCTCCACCACAGCCTGCCGCCGCCGCCGTCGCCGTCCCCGTCGCCCCCACCCCAGCCTCCGCCCGTCCAACCCACCAAACCCCCCAGCAAATCGATCCCGCCGCCCAAAACCCCCGCGCAGCCGAAGCCCGCGGCGGCGGCGGCGGCAGGGAAACCTAGGCCCAAGTCCAACCCCGCGCCCGCCGGCGGCGGCGAGCACTGGTGGCTGGTGGGGAGCGCCGAGATGGCCGGCCTGTCCACCTGCAAGGGCAGGCGCATC…	chr6:62692027-62705149	Horvu_AKASHIN_6H01G126900	ATGGCGAAGAAGAGCGAGAGGGCGGAGCAGGTGGCGGCGGTGCGCGCGGTGCTCGGCGAGGAGACGCCGGAGATGGACATCATCCGCGCGCTCCACATGGCCGGCGACGACCCCACCAAGACCATCAACATCCTCCTCGACCTCCACCACAGCCTGCCGCCGCCGCCGTCGCCGTCCCCGTCGCCCCCACCCCAGCCTCCGCCCGTCCAACCCACCAAACCCCCCAGCAAATCGATCCCGCCGCCCAAAACCCCCGCGCAGCCGAAGCCCGCGGCGGCGGCGGCGGCAGGGAAACCTAGGCCCAAGTCCAACCCCGCGCCCGCCGGCGGCGGCGAGCACTGGTGGCTGGTGGGGAGCGCCGAGATGGCCGGCCTGTCCACCTGCAAGGGCAGGCGCATC…	chr6H:62812515-62825657	Horvu_BARKE_6H01G139900	ATGGCGAAGAAGAGCGAGAGGGCGGAGCAGGTGGCGGCGGTGCGCGCGGTGCTCGGCGAGGAGACGCCGGAGATGGACATCATCCGCGCGCTCCACATGGCCGGCGACGACCCCACCAAGACCATCAACATCCTCCTCGACCTCCACCACAGCCTGCCGCCGCCGCCGTCGCCGTCCCCGTCGCCCCCACCCCAGCCTCCGCCCGTCCAACCCACCAAACCCCCCAGCAAATCGATCCCGCCGCCCAAAACCCCCGCGCAGCCGAAGCCCGCGGCGGCGGCGGCGGCAGGGAAACCTAGGCCCAAGTCCAACCCCGCGCCCGCCGGCGGCGGCGAGCACTGGTGGCTGGTGGGGAGCGCCGAGATGGCCGGCCTGTCCACCTGCAAGGGCAGGCGCATC…	chr6H:58475002-58488145	Horvu_GOLDEN_6H01G115600	ATGGCGAAGAAGAGCGAGAGGGCGGAGCAGGTGGCGGCGGTGCGCGCGGTGCTCGGCGAGGAGACGCCGGAGATGGACATCATCCGCGCGCTCCACATGGCCGGCGACGACCCCACCAAGACCATCAACATCCTCCTCGACCTCCACCACAGCCTGCCGCCGCCGCCGTCGCCGTCCCCGTCGCCCCCACCCCAGCCTCCGCCCGTCCAACCCACCAAACCCCCCAGCAAATCGATCCCGCCGCCCAAAACCCCCGCGCAGCCGAAGCCCGCGGCGGCGGCGGCGGCAGGGAAACCTAGGCCCAAGTCCAACCCCGCGCCCGCCGGCGGCGGCGAGCACTGGTGGCTGGTGGGGAGCGCCGAGATGGCCGGCCTGTCCACCTGCAAGGGCAGGCGCATC…	chr6H:49358672-49371815	Horvu_HOCKETT_6H01G124600	ATGGCGAAGAAGAGCGAGAGGGCGGAGCAGGTGGCGGCGGTGCGCGCGGTGCTCGGCGAGGAGACGCCGGAGATGGACATCATCCGCGCGCTCCACATGGCCGGCGACGACCCCACCAAGACCATCAACATCCTCCTCGACCTCCACCACAGCCTGCCGCCGCCGCCGTCGCCGTCCCCGTCGCCCCCACCCCAGCCTCCGCCCGTCCAACCCACCAAACCCCCCAGCAAATCGATCCCGCCGCCCAAAACCCCCGCGCAGCCGAAGCCCGCGGCGGCGGCGGCGGCAGGGAAACCTAGGCCCAAGTCCAACCCCGCGCCCGCCGGCGGCGGCGAGCACTGGTGGCTGGTGGGGAGCGCCGAGATGGCCGGCCTGTCCACCTGCAAGGGCAGGCGCATC…	chr6H:54520119-54533262	Horvu_10350_6H01G136800	ATGGCGAAGAAGAGCGAGAGGGCGGAGCAGGTGGCGGCGGTGCGCGCGGTGCTCGGCGAGGAGACGCCGGAGATGGACATCATCCGCGCGCTCCACATGGCCGGCGACGACCCCACCAAGACCATCAACATCCTCCTCGACCTCCACCACAGCCTGCCGCCGCCGCCGTCGCCGTCCCCGTCGCCCCCACCCCAGCCTCCGCCCGTCCAACCCACCAAACCCCCCAGCAAATCGATCCCGCCGCCCAAAACCCCCGCGCAGCCGAAGCCCGCGGCGGCGGCGGCGGCGGCGGCAGGGAAACCTAGGCCCAAGTCCAACCCCGCGCCCGCCGGCGGCGGCGAGCACTGGTGGCTGGTGGGGAGCGCCGAGATGGCCGGCCTGTCCACCTGCAAGGGCAGG…	chr6H:59381759-59395359	Horvu_13821_6H01G133500	ATGGCGAAGAAGAGCGAGAGGGCGGAGCAGGTGGCGGCGGTGCGCGCGGTGCTCGGCGAGGAGACGCCGGAGATGGACATCATCCGCGCGCTCCACATGGCCGGCGACGACCCCACCAAGACCATCAACATCCTCCTCGACCTCCACCACAGCCTGCCGCCGCCGCCGTCGCCGTCCCCGTCGCCCCCACCCCAGCCTCCGCCCGTCCAACCCACCAAACCCCCCAGCAAATCGATCCCGCCGCCCAAAACCCCCGCGCAGCCGAAGCCCGCGGCGGCGGCGGCGGCAGGGAAACCTAGGCCCAAGTCCAACCCCGCGCCCGCCGGCGGCGGCGAGCACTGGTGGCTGGTGGGGAGCGCCGAGATGGCCGGCCTGTCCACCTGCAAGGGCAGGCGCATC…	chr6H:64090714-64103836	Horvu_13942_6H01G131100	ATGGCGAAGAAGAGCGAGAGGGCGGAGCAGGTGGCGGCGGTGCGCGCGGTGCTCGGCGAGGAGACGCCGGAGATGGACATCATCCGCGCGCTCCACATGGCCGGCGACGACCCCACCAAGACCATCAACATCCTCCTCGACCTCCACCACAGCCTGCCGCCGCCGCCGTCGCCGTCCCCGTCGCCCCCACCCCAGCCTCCGCCCGTCCAACCCACCAAACCCCCCAGCAAATCGATCCCGCCGCCCAAAACCCCCGCGCAGCCGAAGCCCGCGGCGGCGGCGGCGGCAGGGAAACCTAGGCCCAAGTCCAACCCCGCGCCCGCCGGCGGCGGCGAGCACTGGTGGCTGGTGGGGAGCGCCGAGATGGCCGGCCTGTCCACCTGCAAGGGCAGGCGCATC…	chr6H:60111180-60124323	Horvu_21599_6H01G136000	ATGGCGAAGAAGAGCGAGAGGGCGGAGCAGGTGGCGGCGGTGCGCGCGGTGCTCGGCGAGGAGACGCCGGAGATGGACATCATCCGCGCGCTCCACATGGCCGGCGACGACCCCACCAAGACCATCAACATCCTCCTCGACCTCCACCACAGCCTGCCGCCGCCGCCGTCGCCGTCCCCGTCGCCCCCACCCCAGCCTCCGCCCGTCCAACCCACCAAACCCCCCAGCACATCGATCCCGCCGCCCAAAACCCCCGCGCAGCCGAAGCCCGCGGCGGCGGCGGCGGCAGGGAAACCTAGGCCCAAGTCCAACCCCGCGCCCGCCGGCGGCGGCGAGCACTGGTGGCTGGTGGGGAGCGCCGAGATGGCCGGCCTGTCCACCTGCAAGGGCAGGCGCATC…	chr6H:63451843-63464986	Horvu_3081_6H01G133100	ATGGCGAAGAAGAGCGAGAGGGCGGAGCAGGTGGCGGCGGTGCGCGCGGTGCTCGGCGAGGAGACGCCGGAGATGGACATCATCCGCGCGCTCCACATGGCCGGCGACGACCCCACCAAGACCATCAACATCCTCCTCGACCTCCACCACAGCCTGCCGCCGCCGCCGTCGCCGTCCCCGTCGCCCCCACCCCAGCCTCCGCCCGTCCAACCCACCAAACCCCCCAGCAAATCGATCCCGCCGCCCAAAACCCCCGCGCAGCCGAAGCCCGCGGCGGCGGCGGCGGCAGGGAAACCTAGGCCCAAGTCCAACCCCGCGCCCGCCGGCGGCGGCGAGCACTGGTGGCTGGTGGGGAGCGCCGAGATGGCCGGCCTGTCCACCTGCAAGGGCAGGCGCATC…	chr6H:60205082-60218238	Horvu_HHOR_6H01G130500	ATGGCGAAGAAGAGCGAGAGGGCGGAGCAGGTGGCGGCGGTGCGCGCGGTGCTCGGCGAGGAGACGCCGGAGATGGACATCATCCGCGCGCTCCACATGGCCGGCGACGACCCCACCAAGACCATCAACATCCTCCTCGACCTCCACCACAGCCTGCCGCCGCCGCCGTCGCCGTCCCCGTCGCCCCCACCCCAGCCTCCGCCCGTCCAACCCACCAAACCCCCCAGCACATCGATCCCGCCGCCCAAAACCCCCGCGCAGCCGAAGCCCGCGGCGGCGGCGGCGGCAGGGAAACCTAGGCCCAAGTCCAACCCCGCGCCCGCCGGCGGCGGCGAGCACTGGTGGCTGGTGGGGAGCGCCGAGATGGCCGGCCTGTCCACCTGCAAGGGCAGGCGCATC…	chr6H:65236784-65249928	Horvu_7552_6H01G131200	ATGGCGAAGAAGAGCGAGAGGGCGGAGCAGGTGGCGGCGGTGCGCGCGGTGCTCGGCGAGGAGACGCCGGAGATGGACATCATCCGCGCGCTCCACATGGCCGGCGACGACCCCACCAAGACCATCAACATCCTCCTCGACCTCCACCACAGCCTGCCGCCGCCGCCGTCGCCGTCCCCGTCGCCCCCACCCCAGCCTCCGCCCGTCCAACCCACCAAACCCCCCAGCACATCGATCCCGCCGCCCAAAACCCCCGCGCAGCCGAAGCCCGCGGCGGCGGCGGCGGCAGGGAAACCTAGGCCCAAGTCCAACCCCGCGCCCGCCGGCGGCGGCGAGCACTGGTGGCTGGTGGGGAGCGCCGAGATGGCCGGCCTGTCCACCTGCAAGGGCAGGCGCATC…	chr6H:59835990-59849131	Horvu_8148_6H01G137300	ATGGCGAAGAAGAGCGAGAGGGCGGAGCAGGTGGCGGCGGTGCGCGCGGTGCTCGGCGAGGAGACGCCGGAGATGGACATCATCCGCGCGCTCCACATGGCCGGCGACGACCCCACCAAGACCATCAACATCCTCCTCGACCTCCACCACAGCCTGCCGCCGCCGCCGTCGCCGTCCCCGTCGCCCCCACCCCAGCCTCCGCCCGTCCAACCCACCAAACCCCCCAGCAAATCGATCCCGCCGCCCAAAACCCCCGCGCAGCCGAAGCCCGCGGCGGCGGCGGCGGCAGGGAAACCTAGGCCCAAGTCCAACCCCGCGCCCGCCGGCGGCGGCGAGCACTGGTGGCTGGTGGGGAGCGCCGAGATGGCCGGCCTGTCCACCTGCAAGGGCAGGCGCATC…	chr6H:61292334-61305456	Horvu_9043_6H01G132600	ATGGCGAAGAAGAGCGAGAGGGCGGAGCAGGTGGCGGCGGTGCGCGCGGTGCTCGGCGAGGAGACGCCGGAGATGGACATCATCCGCGCGCTCCACATGGCCGGCGACGACCCCACCAAGACCATCAACATCCTCCTCGACCTCCACCACAGCCTGCCGCCGCCGCCGTCGCCGTCCCCGTCGCCCCCACCCCAGCCTCCGCCCGTCCAACCCACCAAACCCCCCAGCAAATCGATCCCGCCGCCCAAAACCCCCGCGCAGCCGAAGCCCGCGGCGGCGGCGGCGGCGGCGGCAGGGAAACCTAGGCCCAAGTCCAACCCCGCGCCCGCCGGCGGCGGCGAGCACTGGTGGCTGGTGGGGAGCGCCGAGATGGCCGGCCTGTCCACCTGCAAGGGCAGG…	chr6H:62526880-62540480	Horvu_IGRI_6H01G134200	ATGGCGAAGAAGAGCGAGAGGGCGGAGCAGGTGGCGGCGGTGCGCGCGGTGCTCGGCGAGGAGACGCCGGAGATGGACATCATCCGCGCGCTCCACATGGCCGGCGACGACCCCACCAAGACCATCAACATCCTCCTCGACCTCCACCACAGCCTGCCGCCGCCGCCGTCGCCGTCCCCGTCGCCCCCACCCCAGCCTCCGCCCGTCCAACCCACCAAACCCCCCAGCAAATCGATCCCGCCGCCCAAAACCCCCGCGCAGCCGAAGCCCGCGGCGGCGGCGGCGGCAGGGAAACCTAGGCCCAAGTCCAACCCCGCGCCCGCCGGCGGCGGCGAGCACTGGTGGCTGGTGGGGAGCGCCGAGATGGCCGGCCTGTCCACCTGCAAGGGCAGGCGCATC…	chr6H:60705847-60718969	Horvu_OUN333_6H01G131000	ATGGCGAAGAAGAGCGAGAGGGCGGAGCAGGTGGCGGCGGTGCGCGCGGTGCTCGGCGAGGAGACGCCGGAGATGGACATCATCCGCGCGCTCCACATGGCCGGCGACGACCCCACCAAGACCATCAACATCCTCCTCGACCTCCACCACAGCCTGCCGCCGCCGCCGTCGCCGTCCCCGTCGCCCCCACCCCAGCCTCCGCCCGTCCAACCCACCAAACCCCCCAGCAAATCGATCCCGCCGCCCAAAACCCCCGCGCAGCCGAAGCCCGCGGCGGCGGCGGCGGCAGGGAAACCTAGGCCCAAGTCCAACCCCGCGCCCGCCGGCGGCGGCGAGCACTGGTGGCTGGTGGGGAGCGCCGAGATGGCCGGCCTGTCCACCTGCAAGGGCAGGCGCATC…	chr6H:62795204-62808346
	Rad5_16_3	HORVU.MOREX.r3.2HG0103780	ATGACGTGCGACGGCGTCTGGCAGGAGTCCCCCAGCCAGGCCGAGCTCTTCGCCGCCGAGGTCGCGGCCATCCGCGCGGTGCTCGGCGCCGCGCTCCCGGAGGCCCGCGTCCTCGCTGCGCTCTCCCGCTGCGGCGGCAACGCCGACCGCGCCATCAACGCGCTCCTCGACGACGGTGACACCGACGCCGATGCCGCCGCCGAGCGCGCCATCGACGAGCTCCTCGACGCCGAGAATGTCCGCGCCAAGGCGGAGCGCGACGCTGCCCTCACGCTGGCGACCAAGTTCAGGGTGAAGACCGAGGCCGTCGACGTGCCCAAGAAGGAGCGGCCTCTCTGCCCCCCTCCCGCCAAAGTGGCCCCTTTGCCGCCGCCCCGCCGCGTCAAGGAGGAGGAGGAG…	chr2:16941931-16947775	Horvu_AKASHIN_2H01G053700	ATGACGTGCGACGGCGTCTGGCAGGAGTCCCCCAGCCAGGCCGAGCTCTTCGCCGCCGAGGTCGCGGCCATCCGCGCGGTGCTCGGCGCCGCGCTCCCGGAGGCCCGCGTCCTCGCCGCGCTCTCCCGCTGCGGCGGCAACGCCGACCGCGCCATCAACGCGCTCCTCGACGACGGTGACACCGACGCCGATGCCGCCGCCGAGCGCGCCATCGACGAGCTCCTCGACGCCGAGAATGTCCGCGCCAAGGCGGAGCGCGACGCTGCCCTCACGCTGGCGACCAAGTTCAGGGTGAAGACCGAGGCCGTCGACGTGCCCAAGAAGGAGCGGCCTCTCTGCCCCCCTCCCGCCAAAGTGGCCCCTTTGCCGCCGCCCCGCCGCGTCAAGGAGGAGGAGGAG…	chr2H:16301478-16307323	Horvu_BARKE_2H01G061200	ATGACGTGCGACGGCGTCTGGCAGGAGTCCCCCAGCCAGGCCGAGCTCTTCGCCGCCGAGGTCGCGGCCATCCGCGCGGTGCTCGGCGCCGCGCTCCCGGAGGCCCGCGTCCTCGCCGCGCTCTCCCGCTGCGGCGGCAACGCCGACCGCGCCATCAACGCGCTCCTCGACGACGGTGACACCGACGCCGATGCCGCCGCCGAGCGCGCCATCGACGAGCTCCTCGACGCCGAGAATGTCCGCGCCAAGGCGGAGCGCGACGCTGCCCTCACGCTGGCGACCAATTTCAGGGTGAAGACCGAGGCCGTCGACGTGCCCAAGAAGGAGCGGCCTCTCTGCCCCCCTCCCGCCAAAGTGGCCCCTTTGCCGCCGCCCCGCCGCGTCAAGGAGGAGGAGGAG…	chr2H:15454580-15460502	Horvu_GOLDEN_2H01G049000	ATGACGTGCGACGGCGTCTGGCAGGAGTCCCCCAGCCAGGCCGAGCTCTTCGCCGCCGAGGTCGCGGCCATCCGCGCGGTGCTCGGCGCCGCGCTCCCGGAGGCCCGCGTCCTCGCCGCGCTCTCCCGCTGCGGCGGCAACGCCGACCGCGCCATCAACGCGCTCCTCGACGACGGTGACACCGACGCCGATGCCGCCGCCGAGCGCGCCATCGACGAGCTCCTCGACGCCGAGAATGTCCGCGCCAAGGCGGAGCGCGACGCTGCCCTCACGCTGGCGACCAATTTCAGGGTGAAGACCGAGGCCGTCGACGTGCCCAAGAAGGAGCGGCCTCTCTGCCCCCCTCCCGCCAAAGTGGCCCCTTTGCCGCCGCCCCGCCGCGTCAAGGAGGAGGAGGAG…	chr2H:12036557-12042751	Horvu_HOCKETT_2H01G043700	ATGACGTGCGACGGCGTCTGGCAGGAGTCCCCCAGCCAGGCCGAGCTCTTCGCCGCCGAGGTCGCGGCCATCCGCGCGGTGCTCGGCGCCGCGCTCCCGGAGGCCCGCGTCCTCGCCGCGCTCTCCCGCTGCGGCGGCAACGCCGACCGCGCCATCAACGCGCTCCTCGACGACGGTGACACCGACGCCGATGCCGCCGCCGAGCGCGCCATCGACGAGCTCCTCGACGCCGAGAATGTCCGCGCCAAGGCGGAGCGCGACGCTGCCCTCACGCTGGCGACCAATTTCAGGGTGAAGACCGAGGCCGTCGACGTGCCCAAGAAGGAGCGGCCTCTCTGCCCCCCTCCCGCCAAAGTGGCCCCTTTGCCGCCGCCCCGCCGCGTCAAGGAGGAGGAGGAG…	chr2H:11249714-11255990	Horvu_10350_2H01G051600	ATGGCAAGCGCCATCGCGGCCCCGCCGAAGAGCGATTGGAAGATGGTCGTGGCGGCGCCGGAGGCCGAGCTCGGGGACTTCCCGCTGGAGCCCGACTGGTTCCTCGTCGACAAGTCCTACGTCGCCGGGCTGTCCACGCACAGCGGCAGGAAGATGCTCGACGCCGGGGAGATTGTCCATTTCGGCTTCCCGTCCTACGACAGGGCCAACTGTGGCATCAAGATGTCGGCCAAGAAGGCGGCGTCGTTGTTACAGATTGTGCGCTTCTCGACCAAGCGCGCCGGAGAGATTGGAAAGCTATCTCCGGAGTGGACAAAGTGCCTTGTCCCGCTGGTGAACTCTTCCAAAGTAAAGATTCAGGGGAAGATCGTGTTTCAGACAATGGAGCTGAGGCTGATG…	chr2H:14427008-14432135	Horvu_13821_2H01G054800	ATGACGTGCGACGGCGTCTGGCAGGAGTCCCCCAGCCAGGCCGAGCTCTTCGCCGCCGAGGTCGCGGCCATCCGCGCGGTGCTCGGCGCCGCGCTCCCGGAGGCCCGCGTCCTCGCCGCGCTCTCCCGCTGCGGCGGCAACGCCGACCGCGCCATCAACGCGCTCCTCGACGACGGTGACACCGACGCCGATGCCGCCGCCGAGCGCGCCATCGACGAGCTCCTCGACGCCGAGAATGTCCGCGCCAAGGCGGAGCGCGACGCTGCCCTCACGCTGGCGACCAATTTCAGGGTGAAGACCGAGGCCGTCGACGTGCCCAAGAAGGAGCGGCCTCTCTGCCCCCCTCCCGCCAAAGTGGCCCCTTTGCCGCCGCCCCGCCGCGTCAAGGAGGAGGAGGAG…	chr2H:16540273-16546760	Horvu_13942_2H01G053200	ATGACGTGCGACGGCGTCTGGCAGGAGTCCCCCAGCCAGGCCGAGCTCTTCGCCGCCGAGGTCGCGGCCATCCGCGCGGTGCTCGGCGCCGCGCTCCCGGAGGCCCGCGTCCTCGCCGCGCTCTCCCGCTGCGGCGGCAACGCCGACCGCGCCATCAACGCGCTCCTCGACGACGGTGACACCGACGCCGATGCCGCCGCCGAGCGCGCCATCGACGAGCTCCTCGACGCCGAGAATGTCCGCGCCAAGGCGGAGCGCGACGCTGCCCTCACGCTGGCGACCAAGTTCAGGGTGAAGACCGAGGCCGTCGACGTGCCCAAGAAGGAGCGGCCTCTCTGCCCCCCTCCCGCCAAAGTGGCCCCTTTGCCGCCGCCCCGCCGCGTCAAGGAGGAGGAGGAG…	chr2H:14081307-14087150	Horvu_21599_2H01G055800	ATGACGTGCGACGGCGTCTGGCAGGAGTCCCCCAGCCAGGCCGAGCTCTTCGCCGCCGAGGTCGCGGCCATCCGCGCGGTGCTCGGCGCCGCGCTCCCGGAGGCCCGCGTCCTCGCCGCGCTCTCCCGCTGCGGCGGCAACGCCGACCGCGCCATCAACGCGCTCCTCGACGACGGTGACACCGACGCCGATGCCGCCGCCGAGCGCGCCATCGACGAGCTCCTCGACGCCGAGAATGTCCGCGCCAAGGCGGAGCGCGACGCTGCCCTCACGCTGGCGACCAAGTTCAGGGTGAAGACCGAGGCCGTCGACGTGCCCAAGAAGGAGCGGCCTCTCTGCCCCCCTCCCGCCAAAGTGGCCCCTTTGCCGCCGCCCCGCCGCGTCAAGGAGGAGGAGGAG…	chr2H:15837160-15843013	Horvu_3081_2H01G055700	ATGACGTGCGACGGCGTCTGGCAGGAGTCCCCCAGCCAGGCCGAGCTCTTCGCCGCCGAGGTCGCGGCCATCCGCGCGGTGCTCGGCGCCGCGCTCCCGGAGGCCCGCGTCCTCGCCGCGCTCTCCCGCTGCGGCGGCAACGCCGACCGCGCCATCAACGCGCTCCTCGACGACGGTGACACCGACGCCGATGCCGCCGCCGAGCGCGCCATCGACGAGCTCCTCGACGCCGAGAATGTCCGCGCCAAGGCGGAGCGCGACGCTGCCCTCACGCTGGCGACCAAGTTCAGGGTGAAGACCGAGGCCGTCGACGTGCCCAAGAAGGAGCGGCCTCTCTGCCCCCCTCCCGCCAAAGTGGCCCCTTTGCCGCCGCCCCGCCGCGTCAAGGAGGAGGAGGAG…	chr2H:15426259-15432102	Horvu_HHOR_2H01G051800	ATGACGTGCGACGGCGTCTGGCAGGAGTCCCCCAGCCAGGCCGAGCTCTTCGCCGCCGAGGTCGCGGCCATCCGCGCGGTGCTCGGCGCCGCGCTCCCGGAGGCCCGCGTCCTCGCCGCGCTCTCCCGCTGCGGCGGCAACGCCGACCGCGCCATCAACGCGCTCCTCGACGACGGTGACACCGACGCCGATGCCGCCGCCGAGCGCGCCATCGACGAGCTCCTCGACGCCGAGAATGTCCGCGCCAAGGCGGAGCGCGACGCTGCCCTCACGCTGGCGACCAAGTTCAGGGTGAAGACCGAGGCCGTCGACGTGCCCAAGAAGGAGCGGCCTCTCTGCCCCCCTCCCGCCAAAGTGGCCCCTTTGCCGCCGCCCCGCCGCGTCAAGGAGGAGGAGGAG…	chr2H:15434324-15440177	Horvu_7552_2H01G053800	ATGACGTGCGACGGCGTCTGGCAGGAGTCCCCCAGCCAGGCCGAGCTCTTCGCCGCCGAGGTCGCGGCCATCCGCGCGGTGCTCGGCGCCGCGCTCCCGGAGGCCCGCGTCCTCGCCGCGCTCTCCCGCTGCGGCGGCAACGCCGACCGCGCCATCAACGCGCTCCTCGACGACGGTGACACCGACGCCGATGCCGCCGCCGAGCGCGCCATCGACGAGCTCCTCGACGCCGAGAATGTCCGCGCCAAGGCGGAGCGCGACGCTGCCCTCACGCTGGCGACCAATTTCAGGGTGAAGACCGAGGCCGTCGACGTGCCCAAGAAGGAGCGGCCTCTCTGCCCCCCTCCCGCCAAAGTGGCCCCTTTGCCGCCGCCCCGCCGCGTCAAGGAGGAGGAGGAG…	chr2H:14645810-14651962	Horvu_8148_2H01G054200	ATGACGTGCGACGGCGTCTGGCAGGAGTCCCCCAGCCAGGCCGAGCTCTTCGCCGCCGAGGTCGCGGCCATCCGCGCGGTGCTCGGCGCCGCGCTCCCGGAGGCCCGCGTCCTCGCCGCGCTCTCCCGCTGCGGCGGCAACGCCGACCGCGCCATCAACGCGCTCCTCGACGACGGTGACACCGACGCCGATGCCGCCGCCGAGCGCGCCATCGACGAGCTCCTCGACGCCGAGAATGTCCGCGCCAAGGCGGAGCGCGACGCTGCCCTCACGCTGGCGACCAATTTCAGGGTGAAGACCGAGGCCGTCGACGTGCCCAAGAAGGAGCGGCCTCTCTGCCCCCCTCCCGCCAAAGTGGCCCCTTTGCCGCCGCCCCGCCGCGTCAAGGAGGAGGAGGAG…	chr2H:15714681-15721024	Horvu_9043_2H01G056000	ATGACGTGCGACGGCGTCTGGCAGGAGTCCCCCAGCCAGGCCGAGCTCTTCGCCGCCGAGGTCGCGGCCATCCGCGCGGTGCTCGGCGCCGCGCTCCCGGAGGCCCGCGTCCTCGCCGCGCTCTCCCGCTGCGGCGGCAACGCCGACCGCGCCATCAACGCGCTCCTCGACGACGGTGACACCGACGCCGATGCCGCCGCCGAGCGCGCCATCGACGAGCTCCTCGACGCCGAGAATGTCCGCGCCAAGGCGGAGCGCGACGCTGCCCTCACGCTGGCGACCAATTTCAGGGTGAAGACCGAGGCCGTCGACGTGCCCAAGAAGGAGCGGCCTCTCTGCCCCCCTCCCGCCAAAGTGGCCCCTTTGCCGCCGCCCCGCCGCGTCAAGGAGGAGGAGGAG…	chr2H:15810616-15816933	Horvu_IGRI_2H01G053900	ATGACGTGCGACGGCGTCTGGCAGGAGTCCCCCAGCCAGGCCGAGCTCTTCGCCGCCGAGGTCGCGGCCATCCGCGCGGTGCTCGGCGCCGCGCTCCCGGAGGCCCGCGTCCTCGCCGCGCTCTCCCGCTGCGGCGGCAACGCCGACCGCGCCATCAACGCGCTCCTCGACGACGGTGACACCGACGCCGATGCCGCCGCCGAGCGCGCCATCGACGAGCTCCTCGACGCCGAGAATGTCCGCGCCAAGGCGGAGCGCGACGCTGCCCTCACGCTGGCGACCAAGTTCAGGGTGAAGACCGAGGCCGTCGACGTGCCCAAGAAGGAGCGGCCTCTCTGCCCCCCTCCCGCCAAAGTGGCCCCTTTGCCGCCGCCCCGCCGCGTCAAGGAGGAGGAGGAG…	chr2H:13950198-13956051	Horvu_OUN333_2H01G051600	ATGACGTGCGACGGCGTCTGGCAGGAGTCCCCCAGCCAGGCCGAGCTCTTCGCCGCCGAGGTCGCGGCCATCCGCGCGGTGCTCGGCGCCGCGCTCCCGGAGGCCCGCGTCCTCGCCGCGCTCTCCCGCTGCGGCGGCAACGCCGACCGCGCCATCAACGCGCTCCTCGACGACGGTGACACCGACGCCGATGCCGCCGCCGAGCGCGCCATCGACGAGCTCCTCGACGCCGAGAATGTCCGCGCCAAGGCGGAGCGCGACGCTGCCCTCACGCTGGCGACCAAGTTCAGGGTGAAGACCGAGGCCGTCGACGTGCCTAAGAAGGAGCGGCCTCTCTGCCCCCCTCCCGCCAAAGCGGCCCCTTTGCCGCCGCCCCGCCGCGTCAAGGAGGAGGAGGAG…	chr2H:15658866-15664718
	Rad5_16_4	HORVU.MOREX.r3.2HG0141740	ATGCCTCGCCGAAACGGGAATGCATCTGGCCCCGGCGGCAGTCGTCGCCGCCGGCGCGACGACCACGACGAGAGCGTCCCCTCCGATAACACCTCCGACTCCGACTTCGTCGCCGGTACGGATGACGAGGCGGGGGACGACGACGACGAGTTTGCCTCCGATGAAGACGCCCCTGCGCCTGCGGTGGCGGTGGCGCCGCGTCCGGCGTTGTCACCACGGCCGCGCAAGTCCAAGTGTAGGCGGAAGACGAAGAAGGGGAAGCGCGACGAGGACGGGCCGCCCCTGCCGTGGGAAGAGTGGGCGGAGGCTAATACCAAGTGGCTCGACGAACGCGTCGGGGCGTCGGAGGAGACCAACACCTCGGCGGCGGCGGTGGTGCCAACCGCGGAGCCGGCCCCG…	chr2:220294018-220301018	Horvu_AKASHIN_2H01G297900	ATGCCTCGCCGAAACGGGAATGCATCTGGCCCCGGCGGCAGTCGTCGCCGCCGGCGCGACGACCACGACGAGAGCGTCCCCTCCGATAACACCTCCGACTCCGACTTCGTCGCCGGTACGGATGACGAGGCGGGGGACGACGACGACGAGTTTGCCTCCGATGAAGACGCCCCTGCGCCTGCGGTGGCGGTGGCGCCGCGTCCGGCGTTGTCACCACGGCCGCGCAAGTCCAAGTGTAGGCGGAAGACGAAGAAGGGGAAGCGCGACGAGGACGGGCCGCCCCTGCCGTGGGAAGAGTGGGCGGAGGCTAATACCAAGTGGCTCGACGAACGCGTCGGGGCGTCGGAGGAGACCAACACCTCGGCGGCGGCGGTGGTGCCAACCGCGGAGCCGGCCCCG…	chr2H:230483396-230489997	Horvu_BARKE_2H01G307300	ATGCCTCGCCGAAACGGGAATGCATCTGGCCCCGGCGGCAGTCGTCGCCGCCGGCGCGACGACCACGACGAGAGCGTCCCCTCCGATAACACCTCCGACTCCGACTTCGTCGCCGGTACGGATGACGAGGCGGGGGACGACGACGACGAGTTTGCCTCCGATGAAGACGCCCCTGCGCCTGCGGTGGCGGTGGCGCCGCGTCCGGCGTTGTCACCACGGCCGCGCAAGTCCAAGTGTACGCGGAAGACGAAGAAGGGGAAGCGCGACGAGGACGGGCCGCCCCTGCCGTGGGAAGAGTGGGCGGAGGCTAATACCAAGTGGCTCGACGAACGCGTCGGGGCGTCGGAGGAGACCAACACCTCGGCGGCGGCGGTGGTGCCAACCGCGGAGCCGGCCCCG…	chr2H:215814494-215821094	Horvu_GOLDEN_2H01G270200	ATGCCTCGCCGAAACGGGAATGCATCTGGCCCCGGCGGCAGTCGTCGCCGCCGGCGCGACGACCACGACGAGAGCGTCCCCTCCGATAACACCTCCGACTCCGACTTCGTCGCCGGTACGGATGACGAGGCGGGGGACGACGACGACGAGTTTGCCTCCGATGAAGACGCCCCTGCGCCTGCGGTGGCGGTGGCGCCGCGTCCGGCGTTGTCACCACGGCCGCGCAAGTCCAAGTGTACGCGGAAGACGAAGAAGGGGAAGCGCGACGAGGACGGGCCGCCCCTGCCGTGGGAAGAGTGGGCGGAGGCTAATACCAAGTGGCTCGACGAACGCGTCGGGGCGTCGGAGGAGACCAACACCTCGGCGGCGGCGGTGGTGCCAACCGCGGAGCCGGCCCCG…	chr2H:198091120-198097720	Horvu_HOCKETT_2H01G280700	ATGCCTCGCCGAAACGGGAATGCATCTGGCCCCGGCGGCAGTCGTCGCCGCCGGCGCGACGACCACGACGAGAGCGTCCCCTCCGATAACACCTCCGACTCCGACTTCGTCGCCGGTACGGATGACGAGGCGGGGGACGACGACGACGAGTTTGCCTCCGATGAAGACGCCCCTGCGCCTGCGGTGGCGGTGGCGCCGCGTCCGGCGTTGTCACCACGGCCGCGCAAGTCCAAGTGTACGCGGAAGACGAAGAAGGGGAAGCGCGACGAGGACGGGCCGCCCCTGCCGTGGGAAGAGTGGGCGGAGGCTAATACCAAGTGGCTCGACGAACGCGTCGGGGCGTCGGAGGAGACCAACACCTCGGCGGCGGCGGTGGTGCCAACCGCGGAGCCGGCCCCG…	chr2H:208790881-208797481	Horvu_10350_2H01G306100	ATGGGCATGGGGAAGACCATCCAGGGCATCGCACTCGTCCTCACCGCGCGCCAGCTACGCCCCCCCGGCTCGTCCTCGCCACCGTCCACATCACTGGGCCTCCCGATGCGCCGGGTAGGGTGCACCCTTGTGATCTGCCCCGTGGTGGCCGTCATCCAGTGGGCGCAGGAGATCGAGCGGCACACGGCCAAAGGCAGCGCGCGCGTGCTGCTCTACCATGGTGCTCGCCGGGGCTCTCAGAAGCACGATTTCGACACCTTCGACTTCGTGGTCACCACCTACTCCACCATTGAGGCGGACTACCGGAAGCACATAATGCCACCCAAGATTCGGTGCGAGTACTGCAATAAACAGTTTTACCCCGAGAAGCTCAAGATTCACTTGAGATATTACTGTGGA…	chr2H:216207037-216213068	Horvu_13821_2H01G298100	ATGCCTCGCCGAAACGGGAATGCATCTGGCCCCGGCGGCAGTCGTCGCCGCCGGCGCGACGACCACGACGAGAGCGTCCCCTCCGATAACACCTCCGACTCCGACTTCGTCGCCGGTACGGATGACGAGGCGGGGGACGACGACGACGAGTTTGCCTCCGATGAAGACGCCCCTGCGCCTGCGGTGGCGGTGGCGCCGCGTCCGGCGTTGTCACCACGGCCGCGCAAGTCCAAGTGTACGCGGAAGACGAAGAAGGGGAAGCGCGACGAGGACGGGCCGCCCCTGCCGTGGGAAGAGTGGGCGGAGGCTAATACCAAGTGGCTCGACGAACGCGTCGGGGCGTCGGAGGAGACCAACACCTCGGCGGCGGCGGTGGTGCCAACCGCGGAGCCGGCCCCG…	chr2H:227339163-227345763	Horvu_13942_2H01G296900	ATGCCTCGCCGAAACGGGAATGCATCTGGCCCCGGCGGCAGTCGTCGCCGCCGGCGCGACGACCACGACGAGAGCGTCCCCTCCGATAACACCTCCGACTCCGACTTCGTCGCCGGTACGGATGACGAGGCGGGGGACGACGACGACGAGTTTGCCTCCGATGAAGACGCCCCTGCGCCTGCGGTGGCGGTGGCGCCGCGTCCGGCGTTGTCACCACGGCCGCGCAAGTCCAAGTGTACGCGGAAGACGAAGAAGGGGAAGCGCGACGAGGACGGGCCGCCCCTGCCGTGGGAAGAGTGGGCGGAGGCTAATACCAAGTGGCTCGACGAACGCGTCGGGGCGTCGGAGGAGACCAACACCTCGGCGGCGGCGGTGGTGCCAACCGCGGAGCCGGCCCCG…	chr2H:220616705-220623305	Horvu_21599_2H01G296200	ATGCCTCGCCGAAACGGGAATGCATCTGGCCCCGGCGGTAGTCGTCGCCGCCGGCGCGACGACCACGACGAGAGCGTCCCCTCCGATAACACCTCCGACTCCGACTTCGTCGCCGGTACGGATGACGAGGCGGGGGACGACGACGACGAGTTTGCCTCCGATGAAGACGCCCCTGCACCTGCGGTGGCGGTGGCGCCGCGTCCGGCGTTGTCACCACGGCCGCGCAAGTCCAAGTGTAGGCGGAAGACGAAGAAGGGGAAGCGCGACGAGGACGGGCCGCCCCTGCCGTGGGAAGAGTGGGCGGAGGCTAATACCAAGTGGCTCGACGAACGCGTCGGGGCGTCGGAGGAGACCAACACCTCGGCGGCGGCGGTGGTGCCAACCGCGGAGCCGGCCCCG…	chr2H:225787735-225794335	Horvu_3081_2H01G298500	ATGCCTCGCCGAAACGGGAATGCATCTGGCCCCGGCGGCAGTCGTCGCCGCCGGCGCGACGACCACGACGAGAGCGTCCCCTCCGATAACACCTCCGACTCCGACTTCGTCGCCGGTACGGATGACGAGGCGGGGGACGACGACGACGAGTTTGCCTCCGATGAAGACGCCCCTGCGCCTGCGGTGGCGGTGGCGCCGCGTCCGGCGTTGTCACCACGGCCGCGCAAGTCCAAGTGTACGCGGAAGACGAAGAAGGGGAAGCGCGACGAGGACGGGCCGCCCCTGCCGTGGGAAGAGTGGGCGGAGGCTAATACCAAGTGGCTCGACGAACGCGTCGGGGCGTCGGAGGAGACCAACACCTCGGCGGCGGCGGTGGTGCCAACCGCGGAGCCGGCCCCG…	chr2H:220121689-220128289	Horvu_HHOR_2H01G294000	ATGCCTCGCCGAAACGGGAATGCATCTGGCCCCGGCGGCAGTCGTCGCCGCCGGCGCGACGACCACGACGAGAGCGTCCCCTCCGATAACACCTCCGACTCCGACTTCGTCGCCGGTACGGATGACGAGGCGGGGGACGACGACGACGAGTTTGCCTCCGATGAAGACGCCCCTGCGCCTGCGGTGGCGGTGGCGCCGCGTCCGGCGTTGTCACCACGGCCGCGCAAGTCCAAGTGTACGCGGAAGACGAAGAAGGGGAAGCGCGACGAGGACGGGCCGCCCCTGCCGTGGGAAGAGTGGGCGGAGGCTAATACCAAGTGGCTCGACGAACGCGTCGGGGCGTCGGAGGAGACCAACACCTCGGCGGCGGCGGTGGTGCCAACCGCGGAGCCGGCCCCG…	chr2H:237004242-237010842	Horvu_7552_2H01G299800	ATGCCTCGCCGAAACGGGAATGCATCTGGCCCCGGCGGCAGTCGTCGCCGCCGGCGCGACGACCACGACGAGAGCGTCCCCTCCGATAACACCTCCGACTCCGACTTCGTCGCCGGTACGGATGACGAGGCGGGGGACGACGACGACGAGTTTGCCTCCGATGAAGACGCCCCTGCGCCTGCGGTGGCGGTGGCGCCGCGTCCGGCGTTGTCACCACGGCCGCGCAAGTCCAAGTGTAGGCGGAAGACGAAGAAGGGGAAGCGCGACGAGGACGGGCCGCCCCTGCCGTGGGAAGAGTGGGCGGAGGCTAATACCAAGTGGCTCGACGAACGCGTCGGGGCGTCGGAGGAGACCAACACCTCGGCGGCGGCGGTGGTGCCAACCGCGGAGCCGGCCCCG…	chr2H:219878094-219884686	Horvu_8148_2H01G300100	ATGCCTCGCCGAAACGGGAATGCATCTGGCCCCGGCGGCAGTCGTCGCCGCCGGCGCGACGACCACGACGAGAGCGTCCCCTCCGATAACACCTCCGACTCCGACTTCGTCGCCGGTACGGATGACGAGGCGGGGGACGACGACGACGAGTTTGCCTCCGATGAAGACGCCCCTGCGCCTGCGGTGGCGGTGGCGCCGCGTCCGGCGTTGTCACCACGGCCGCGCAAGTCCAAGTGTACGCGGAAGACGAAGAAGGGGAAGCGCGACGAGGACGGGCCGCCCCTGCCGTGGGAAGAGTGGGCGGAGGCTAATACCAAGTGGCTCGACGAACGCGTCGGGGCGTCGGAGGAGACCAACACCTCGGCGGCGGCGGTGGTGCCAACCGCGGAGCCGGCCCCG…	chr2H:220887361-220893961	Horvu_9043_2H01G301800	ATGCCTCGCCGAAACGGGAATGCATCTGGCCCCGGCGGCAGTCGTCGCCGCCGGCGCGACGACCACGACGAGAGCGTCCCCTCCGATAACACCTCCGACTCCGACTTCGTCGCCGGTACGGATGACGAGGCGGGGGACGACGACGACGAGTTTGCCTCCGATGAAGACGCCCCTGCGCCTGCGGTGGCGGTGGCGCCGCGTCCGGCGTTGTCACCACGGCCGCGCAAGTCCAAGTGTAGGCGGAAGACGAAGAAGGGGAAGCGCGACGAGGACGGGCCGCCCCTGCCGTGGGAAGAGTGGGCGGAGGCTAATACCAAGTGGCTCGACGAACGCGTCGGGGCGTCGGAGGAGACCAACACCTCGGCGGCGGCGGTGGTGCCAACCGCGGAGCCGGCCCCG…	chr2H:226094331-226100923	Horvu_IGRI_2H01G299200	ATGCCTCGCCGAAACGGGAATGCATCTGGCCCCGGCGGCAGTCGTCGCCGCCGGCGCGACGACCACGACGAGAGCGTCCCCTCCGATAACACCTCCGACTCCGACTTCGTCGCCGGTACGGATGACGAGGCGGGGGACGACGACGACGAGTTTGCCTCCGATGAAGACGCCCCTGCGCCTGCGGTGGCGGTGGCGCCGCGTCCGGCGTTGTCACCACGGCCGCGCAAGTCCAAGTGTACGCGGAAGACGAAGAAGGGGAAGCGCGACGAGGACGGGCCGCCCCTGCCGTGGGAAGAGTGGGCGGAGGCTAATACCAAGTGGCTCGACGAACGCGTCGGGGCGTCGGAGGAGACCAACACCTCGGCGGCGGCGGTGGTGCCAACCGCGGAGCCGGCCCCG…	chr2H:219144472-219151072	Horvu_OUN333_2H01G293500	ATGCCTCGCCGAAACGGGAATGCATCTGGCCCCGGCGGCAGTCGTCGCCGCCGGCGCGACGACCACGACGAGAGCGTCCCCTCCGATAACACCTCCGACTCCGACTTCGTCGCCGGTACGGATGACGAGGCGGGGGACGACGACGACGAGTTTGCCTCCGATGAAGACGCCCCTGCGCCTGCGGTGGCGGTGGCGCCGCGTCCGGCGTTGTCACCACGGCCGCGCAAGTCCAAGTGTAGGCGGAAGACGAAGAAGGGGAAGCGCGACGAGGACGGGCCGCCCCTGCCGTGGGAAGAGTGGGCGGAGGCTAATACCAAGTGGCTCGACGAACGCGTCGGGGCGTCGGAGGAGACCAACACCTCGGCGGCGGCGGTGGTGCCAACCGCGGAGCCGGCCCCG…	chr2H:230259395-230265984
	Ris1_1	HORVU.MOREX.r3.3HG0293510	ATGATGGCGGAGGAACCGGCGATGGATTTCGACGACGGGGGCTACGGCGGCGCCGAGGACAACCTCTCCATGCCCCTCGGCGACTTCATGGCCTTCCTCGAGAGCGAGCCCGCCGACGACGGGGCGGAGGACCCGCGGCCCGAGGCCAATCAAGGTTCCTCAGAGGTGCCAGTGGACATGACAGGTTTTGCAAATGGGTTTGAAAGGCATGAAGAATTTTTGGAGGATGAAATGCAGGCCAATCAAGGCTCCTTAGAGGTGCCAATGGACACGACAGGTGTTGCAAATGAATTTGGAAGCCATGAAGAATTTTTGGGTGATGAAGGTTTCTGGTCGCAATACCAGATGGAAGCAATGGTGGAACAAGGAGATGGAACCTTTGATTACTCCGATGCTAAG…	chr3:509732468-509742368	Horvu_AKASHIN_3H01G447500	ATGATGGCGGAGGAACCGGCGATGGATTTCGACGACGGGGGCTACGGCGGCGCCGAGGACAACCTCTCCATGCCCCTCGGCGACTTCATGGCCTTCCTCGAGAGCGAGCCCGCCGACGACGGGGCGGAGGACCCGCGGCCCGAGGCCAATCAAGGTTCCTCAGAGGTGCCAGTGGACATGACAGGTTTTGCAAATGGGTTTGAAAGGCATGAAGAATTTTTGGAGGATGAAATGCAGGCCAATCAAGGCTCCTTAGAGGTGCCAATGGACACGACAGGTGTTGCAAATGAATTTGGAAGCCATGAAGAATTTTTGGGTGATGAAGGTTTCTGGTCGCAATACCAGATGGAAGCAATGGTGGAACAAGGAGATGGAACCTTTGATTACTCCGATGCTAAG…	chr3H:535684835-535695164	Horvu_BARKE_3H01G449200	ATGATGGCGGAGGAACCGGCGATGGATTTCGACGACGGGGGCTACGGCGGCGCCGAGGACAACCTCTCCATGCCCCTCGGCGACTTCATGGCCTTCCTCGAGAGCGAGCCCGCCGACGACGGGGCGGAGGACCCGCGGCCCGAGNNNAATCAAGGTTCCTCAGAGGTGCCAGTGGACATGACAGGTTTTGCAAATGGGTTTGAAAGGCATGAAGAATTTTTGGAGGATGAAATGCAGGCCAATCAAGGCTCCTTAGAGGTGCCAATGGACACGACAGGTGTTGCAAATGAATTTGGAAGCCATGAAGAATTTTTGGGTGATGAAGGTTTCTGGTCGCAATACCAGATGGAAGCAATGGTGGAACAAGGAGATGGAACCTTTGATTACTCCGATGCTAAG…	chr3H:506895355-506904852	Horvu_GOLDEN_3H01G424400	ATGATGGCGGAGGAACCGGCGATGGATTTCGACGACGGGGGCTACGGCGGCGCCGAGGACAACCTCTCCATGCCCCTCGGCGACTTCATGGCCTTCCTCGAGAGCGAGCCCGCCGACGACGGGGCGGAGGACCCGCGGCCCGAGGCCAATCAAGGTTCCTCAGAGGTGCCAGTGGACATGACAGGTTTTGCAAATGGGTTTGAAAGGCATGAAGAATTTTTGGAGGATGAAATGCAGGCCAATCAAGGCTCCTTAGAGGTGCCAATGGACACGACAGGTGTTGCAAATGAATTTGGAAGCCATGAAGAATTTTTGGGTGATGAAGGTTTCTGGTCGCAATACCAGATGGAAGCAATGGTGGAACAAGGAGATGGAACCTTTGATTACTCCGATGCTAAG…	chr3H:480114497-480123973	Horvu_HOCKETT_3H01G435400	ATGATGGCGGAGGAACCGGCGATGGATTTCGACGACGGGGGCTACGGCGGCGCCGAGGACAACCTCTCCATGCCCCTCGGCGACTTCATGGCCTTCCTCGAGAGCGAGCCCGCCGACGACGGGGCGGAGGACCCGCGGCCCGAGGCCAATCAAGGTTCCTCAGAGGTGCCAGTGGACATGACAGGTTTTGCAAATGGGTTTGAAAGGCATGAAGAATTTTTGGAGGATGAAATGCAGGCCAATCAAGGCTCCTTAGAGGTGCCAATGGACACGACAGGTGTTGCAAATGAATTTGGAAGCCATGAAGAATTTTTGGGTGATGAAGGTTTCTGGTCGCAATACCAGATGGAAGCAATGGTGGAACAAGGAGATGGAACCTTTGATTACTCCGATGCTAAG…	chr3H:495133960-495143436	Horvu_10350_3H01G448800	ATGATGGCGGAGGAACCGGCGATGGATTTCGACGACGGGGGCTACGGCGGCGCCGAGGACAACCTCTCCATGCCCCTCGGCGACTTCATGGCCTTCCTCGAGAGCGAGCCCGCCGACGACGGGGCGGAGGACCCGCGGCCCGAGGCCAATCAAGGTTCCTCAGAGGTGCCAGTGGACATGACAGGTTTTGCAAATGGGTTTGAAAGGCATGAAGAATTTTTGGAGGATGAAATGCAGGCCAATCAAGGCTCCTTAGAGGTGCCAATGGACACGACAGGTGTTGCAAATGAATTTGGAAGCCATGAAGAATTTTTGGGTGATGAAGGTTTCTGGTCGCAATACCAGATGGAAGCAATGGTGGAACAAGGAGATGGAACCTTTGATTACTCCGATGCTAAG…	chr3H:505819234-505828836	Horvu_13821_3H01G443600	ATGATGGCGGAGGAACCGGCGATGGATTTCGACGACGGGGGCTACGGCGGCGCCGAGGACAACCTCTCCATGCCCCTCGGCGACTTCATGGCCTTCCTCGAGAGCGAGCCCGCCGACGACGGGGCGGAGGACCCGCGGCCCGAGGCCAATCAAGGTTCCTCAGAGGTGCCAGTGGACATGACAGGTTTTGCAAATGGGTTTGAAAGGCATGAAGAATTTTTGGAGGATGAAATGCAGGCCAATCAAGGCTCCTTAGAGGTGCCAATGGACACGACAGGTGTTGCAAATGAATTTGGAAGCCATGAAGAATTTTTGGGTGATGAAGGTTTCTGGTCGCAATACCAGATGGAAGCAATGGTGGAACAAGGAGATGGAACCTTTGATTACTCCGATGCTAAG…	chr3H:527203152-527212627	Horvu_13942_3H01G444600	ATGATGGCGGAGGAACCGGCGATGGATTTCGACGACGGGGGCTACGGCGGCGCCGAGGACAACCTCTCCATGCCCCTCGGCGACTTCATGGCCTTCCTCGAGAGCGAGCCCGCCGACGACGGGGCGGAGGACCCGCGGCCCGAGGCCAATCAAGGTTCCTCAGAGGTGCCAGTGGACATGACAGGTTTTGCAAATGGGTTTGAAAGGCATGAAGAATTTTTGGAGGATGAAATGCAGGCCAATCAAGGCTCCTTAGAGGTGCCAATGGACACGACAGGTGTTGCAAATGAATTTGGAAGCCATGAAGAATTTTTGGGTGATGAAGGTTTCTGGTCGCAATACCAGATGGAAGCAATGGTGGAACAAGGAGATGGAACCTTTGATTACTCCGATGCTAAG…	chr3H:519428620-519438098	Horvu_21599_3H01G450800	ATGATGGCGGAGGAACCGGCGATGGATTTCGACGACGGGGGCTACGGCGGCGCCGAGGACAACCTCTCCATGCCCCTCGGCGACTTCATGGCCTTCCTCGAGAGCGAGCCCGCCGACGACGGGGCGGAGGACCCGCGGCCCGAGGCCAATCAAGGTTCCTCAGAGGTGCCAGTGGACATGACAGGTTTTGCAAATGGGTTTGAAAGGCATGAAGAATTTTTGGAGGATGAAATGCAGGCCAATCAAGGCTCCTTAGAGGTGCCAATGGACACGACAGGTGTTGCAAATGAATTTGGAAGCCATGAAGAATTTTTGGGTGATGAAGGTTTCTGGTCGCAATACCAGATGGAAGCAATGGTGGAACAAGGAGATGGAACCTTTGATTACTCCGATGCTAAG…	chr3H:531883790-531893269	Horvu_3081_3H01G442700	ATGATGGCGGAGGAACCGGCGATGGATTTCGACGACGGGGGCTACGGCGGCGCCGAGGACAACCTCTCCATGCCCCTCGGCGACTTCATGGCCTTCCTCGAGAGCGAGCCCGCCGACGACGGGGCGGAGGACCCGCGGCCCGAGGCCAATCAAGGTTCCTCAGAGGTGCCAGTGGACATGACAGGTTTTGCAAATGGGTTTGAAAGGCATGAAGAATTTTTGGAGGATGAAATGCAGGCCAATCAAGGCTCCTTAGAGGTGCCAATGGACACGACAGGTGTTGCAAATGAATTTGGAAGCCATGAAGAATTTTTGGGTGATGAAGGTTTCTGGTCGCAATACCAGATGGAAGCAATGGTGGAACAAGGAGATGGAACCTTTGATTACTCCGATGCTAAG…	chr3H:515250077-515259552	Horvu_HHOR_3H01G443500	ATGATGGCGGAGGAACCGGCGATGGATTTCGACGACGGGGGCTACGGCGGCGCCGAGGACAACCTCTCCATGCCCCTCGGCGACTTCATGGCCTTCCTCGAGAGCGAGCCCGCCGACGACGGGGCGGAGGACCCGCGGCCCGAGGCCAATCAAGGTTCCTCAGAGGTGCCAGTGGACATGACAGGTTTTGCAAATGGGTTTGAAAGGCATGAAGAATTTTTGGAGGATGAAATGCAGGCCAATCAAGGCTCCTTAGAGGTGCCAATGGACACGACAGGTGTTGCAAATGAATTTGGAAGCCATGAAGAATTTTTGGGTGATGAAGGTTTCTGGTCGCAATACCAGATGGAAGCAATGGTGGAACAAGGAGATGGAACCTTTGATTACTCCGATGCTAAG…	chr3H:551710147-551719624	Horvu_7552_3H01G450500	ATGATGGCGGAGGAACCGGCGATGGATTTCGACGACGGGGGCTACGGCGGCGCCGAGGACAACCTCTCCATGCCCCTCGGCGACTTCATGGCCTTCCTCGAGAGCGAGCCCGCCGACGACGGGGCGGAGGACCCGCGGCCCGAGGCCAATCAAGGTTCCTCAGAGGTGCCAGTGGACATGACAGGTTTTGCAAATGGGTTTGAAAGGCATGAAGAATTTTTGGAGGATGAAATGCAGGCCAATCAAGGCTCCTTAGAGGTGCCAATGGACACGACAGGTGTTGCAAATGAATTTGGAAGCCATGAAGAATTTTTGGGTGATGAAGGTTTCTGGTCGCAATACCAGATGGAAGCAATGGTGGAACAAGGAGATGGAACCTTTGATTACTCCGATGCTAAG…	chr3H:517563787-517573266	Horvu_8148_3H01G449300	ATGATGGCGGAGGAACCGGCGATGGATTTCGACGACGGGGGCTACGGCGGCGCCGAGGACAACCTCTCCATGCCCCTCGGCGACTTCATGGCCTTCCTCGAGAGCGAGCCCGCCGACGACGGGGCGGAGGACCCGCGGCCCGAGGCCAATCAAGGTTCCTCAGAGGTGCCAGTGGACATGACAGGTTTTGCAAATGGGTTTGAAAGGCATGAAGAATTTTTGGAGGATGAAATGCAGGCCAATCAAGGCTCCTTAGAGGTGCCAATGGACACGACAGGTGTTGCAAATGAATTTGGAAGCCATGAAGAATTTTTGGGTGATGAAGGTTTCTGGTCGCAATACCAGATGGAAGCAATGGTGGAACAAGGAGATGGAACCTTTGATTACTCCGATGCTAAG…	chr3H:517382213-517391989	Horvu_9043_3H01G441000	ATGATGGCGGAGGAACCGGCGATGGATTTCGACGACGGGGGCTACGGCGGCGCCGAGGACAACCTCTCCATGCCCCTCGGCGACTTCATGGCCTTCCTCGAGAGCGAGCCCGCCGACGACGGGGCGGAGGACCCGCGGCCCGAGGCCAATCAAGGTTCCTCAGAGGTGCCAGTGGACATGACAGGTTTTGCAAATGGGTTTGAAAGGCATGAAGAATTTTTGGAGGATGAAATGCAGGCCAATCAAGGCTCCTTAGAGGTGCCAATGGACACGACAGGTGTTGCAAATGAATTTGGAAGCCATGAAGAATTTTTGGGTGATGAAGGTTTCTGGTCGCAATACCAGATGGAAGCAATGGTGGAACAAGGAGATGGAACCTTTGATTACTCCGATGCTAAG…	chr3H:519445383-519455377	Horvu_IGRI_3H01G443000	ATGATGGCGGAGGAACCGGCGATGGATTTCGACGACGGGGGCTACGGCGGCGCCGAGGACAACCTCTCCATGCCCCTCGGCGACTTCATGGCCTTCCTCGAGAGCGAGCCCGCCGACGACGGGGCGGAGGACCCGCGGCCCGAGGCCAATCAAGGTTCCTCAGAGGTGCCAGTGGACATGACAGGTTTTGCAAATGGGTTTGAAAGGCATGAAGAATTTTTGGAGGATGAAATGCAGGCCAATCAAGGCTCCTTAGAGGTGCCAATGGACACGACAGGTGTTGCAAATGAATTTGGAAGCCATGAAGAATTTTTGGGTGATGAAGGTTTCTGGTCGCAATACCAGATGGAAGCAATGGTGGAACAAGGAGATGGAACCTTTGATTACTCCGATGCTAAG…	chr3H:512640876-512650352	Horvu_OUN333_3H01G448400	ATGATGGCGGAGGAACCGGCGATGGATTTCGACGACGGGGGCTACGGCGGCGCCGAGGACAACCTCTCCATGCCCCTCGGCGACTTCATGGCCTTCCTCGAGAGCGAGCCCGCCGACGACGGGGCGGAGGACCCGCGGCCCGAGGCCAATCAAGGTTCCTCAGAGGTGCCAGTGGACATGACAGGTTTTGCAAATGGGTTTGAAAGGCATGAAGAATTTTTGGAGGATGAAATGCAGGCCAATCAAGGCTCCTTAGAGGTGCCAATGGACACGACAGGTGTTGCAAATGAATTTGGAAGCCATGAAGAATTTTTGGGTGATGAAGGTTTCTGGTCGCAATACCAGATGGAAGCAATGGTGGAACAAGGAGATGGAACCTTTGATTACTCCGATGCTAAG…	chr3H:535122973-535132448
	Ris1_2	HORVU.MOREX.r3.2HG0199060	ATGGAGATTATTGACTTGTGTTCAGATAGTGAGGACGATGTTAAATTGTGTTCAAAAGGCAAAGGCATCACTCACCTGTGCTCAGAGGACAGAAAAGACAATGTTGTCCCTATAGATGGAGTTGACTCCTCTCTTCTTTTACTCAACACGCCGTTTGCCAAGAATAATGCACAACAGCCAATCACTTTGGATGATGATGATTGGATAAGTAGCAATCACGCTTCATGCTCTTATAGATCTCCGGCTGGTTCGTCACACAGGATCTATCCTCTCTCAAGTTCTTCGCTGATGCTATATGATTCCTCATACGGTAAAACCAAGCAGGAAATTGATGATGATGATGATATCTATATGTATTCTGTTCCGCCTCAATCATTTCCAATCAGTCATCCAAGTTTG…	chr2:621597750-621604059	Horvu_AKASHIN_2H01G639000	ATGGAGATTATTGACTTGTGTTCAGATAGTGAGGACGATGTTAAATTGTGTTCAAAAGGCAAAGACATCACTCACCTGTGCTCAGAGGACAGAAAAGACAATGTTGTCCCTATAGATGGAGTTGACTCCTCTCTTCTTTTACTCAACACGCCGTTTGCCAAGAATAATGCACAACAGCCAATCACTTTGGATGATGATGATTGGTTAAGTAGCAATCACGCTTCATGCTCTTATAGATCTCCGGCTGGTTCGTCACACAGGATCTATCCTCTCTCAAGTTCTTCGCTGATGCTATATGATTCCTCATACGGTAAAACCAAGCAGGAAATTGATGATGATGATGATATCTATATGTATTCTGTTCCGCCTCAATCATTTCCAACCAGTCATCCAAGTTTG…	chr2H:651231306-651236490	Horvu_BARKE_2H01G650200	ATGGAGATTATTGACTTGTGTTCAGATAGTGAGGACGATGTTAAATTGTGTTCAAAAGGCAAAGACATCACTCACCTGTGCTCAGAGGACAGAAAAGACAATGTTGTCCCTATTGATGGAGTTGACTCCTCTCTTCTTTTACTCAACACGCCGTTTGCCAAGAATAATGCACAACAGCCAATCACTTTGGACGATGATGATTGGTTAAGTAGCAATCACGCCTCATGCTCTTATAGATCTCCGGCTGGTTCGTCACACAGGATCTATCCTCTCTCAAGTTCTTCGCTGATGCTATATGATTCCTCATACGGTAAAACCAAGCAGGAAATTGATGATGATGATGATATCTATATGTATTCTGTTCCGCCTCAATCATTTCCAACCAGTCATCCAAGTTTG…	chr2H:610629041-610634214	Horvu_GOLDEN_2H01G592900	ATGGAGATTATTGACTTGTGTTCAGATAGTGAGGACGATGTTAAATTGTGTTCAAAAGGCAAAGACATCACTCACCTGTGCTCAGAGGACAGAAAAGACAATGTTGTCCCTATAGATGGAGTTGACTCCTCTCTTCTTTTACTCAACACGCCGTTTGCCAAGAATAATGCACAACAGCCAATCACTTTGGATGATGATGATTGGTTAAGTAGCAATCACGCTTCATGCTCTTATAGATCTCCGGCTGGTTCGTCACACAGGATCTATCCTCTCTCAAGTTCTTCGCTGATGCTATATGATTCCTCATACGGTAAAACCAAGCAGGAAATTGATGATGATGATGATATCTATATGTATTCTGTTCCGCCTCAATCATTTCCAACCAGTCATCCAAGTTTG…	chr2H:577026552-577031689	Horvu_HOCKETT_2H01G608400	ATGGAGATTATTGACTTGTGTTCAGATAGTGAGGACGATGTTAAATTGTGTTCAAAAGGCAAAGGCATCACTCACCTGTGCTCAGAGGACAGAAAAGACAATGTTGTCCCTATAGATGGAGTTGACTCCTCTCTTCTTTTACTCAACACGCCGTTTGCCAAGAATAATGCACAACAGCCAATCACTTTGGATGATGATGATTGGATAAGTAGCAATCACGCTTCATGCTCTTATAGATCTCCGGCTGGTTCGTCACACAGGATCTATCCTCTCTCAAGTTCTTCGCTGATGCTATATGATTCCTCATACGGTAAAACCAAGCAGGAAATTGATGATGATGATGATATCTATATGTATTCTGTTCCGCCTCAATCATTTCCAATCAGTCATCCAAGTTTG…	chr2H:600539076-600544215	Horvu_10350_2H01G643800	ATGGAGATTATTGACTTGTGTTCAGATAGTGAGGACGATGTTAAATTGTGTTCAAAAGGCAAAGGCATCACTCACCTGTGCTCAGAGGACAGAAAAGACAATGTTGTCCCTATAGATGGAGTTGACTCCTCTCTTCTTTTACTCAACACGCCGTTTGCCAAGAATAATGCACAACAGCCAATCACTTTGGATGATGATGATTGGTTAAGTAGCAATCACGCTTCATGCTCTTATAGATCTCCGGCTGGTTCGTCACACAGGATCTATCCTCTCTCAAGTTCTTCGCTGATGCTATATGATTCCTCATACGGTAAAACCAAGCAGGAAATTGATGATGATGATGATATCTATATGTATTCTGTTCCGCCTCAATCATTTCCAACCAGTCATCCAAGTTTG…	chr2H:610623581-610628735	Horvu_13821_2H01G636700	ATGGAGATTATTGACTTGTGTTCAGATAGTGAGGACGATGTTAAATTGTGTTCAAAAGGCAAAGACATCACTCACCTGTGCTCAGAGGACAGAAAAGACAATGTTGTCCCTATAGATGGAGTTGACTCCTCTCTTCTTTTACTCAACACGCCGTTTGCCAAGAATAATGCACAACAGCCAATCACTTTGGATGATGATGATTGGTTAAGTAGCAATCACGCTTCATGCTCTTATAGATCTCCGGCTGGTTCGTCACACAGGATCTATCCTCTCTCAAGTTCTTCGCTGATGCTATATGATTCCTCATACGGTAAAACCAAGCAGGAAATTGATGATGATGATGATATCTATATGTATTCTGTTCCGCCTCAATCATTTCCAACCAGTCATCCAAGTTTG…	chr2H:641556672-641561822	Horvu_13942_2H01G636200	ATGGAGATTATTGACTTGTGTTCAGATAGTGAGGACGATGTTAAATTGTGTTCAAAAGGCAAAGACATCACTCACCTGTGCTCAGAGGACAGAAAAGACAATGTTGTCCCTATTGATGGAGTTGACTCCTCTCTTCTTTTACTCAACACGCCGTTTGCCAAGAATAATGCACAACAGCCAATCACTTTGGACGATGATGATTGGTTAAGTAGCAATCACGCCTCATGCTCTTATAGATCTCCGGCTGGTTCGTCACACAGGATCTATCCTCTCTCAAGTTCTTCGCTGATGCTATATGATTCCTCATACGGTAAAACCAAGCAGGAAATTGATGATGATGATGATATCTATATGTATTCTGTTCCGCCTCAATCATTTCCAACCAGTCATCCAAGTTTG…	chr2H:628528561-628533732	Horvu_21599_2H01G636600	ATGGAGATTATTGACTTGTGTTCAGATAGTGAGGACGATGTTAAATTGTGTTCAAAAGGCAAAGACATCACTCACCTGTGCTCAGAGGACAGAAAAGACAATGTTGTCCCTATAGATGGAGTTGACTCCTCTCTTCTTTTACTCAACACGCCGTTTGCCAAGAATAATGCACAACAGCCAATCACTTTGGATGATGATGATTGGTTAAGTAGCAATCACGCTTCATGCTCTTATAGATCTCCGGCTGGTTCGTCACACAGGATCTATCCTCTCTCAAGTTCTTCGCTGATGCTATATGATTCCTCATACGGTAAAACCAAGCAGGAAATTGATGATGATGATGATATCTATATGTATTCTGTTCCGCCTCAATCATTTCCAACCAGTCATCCAAGTTTG…	chr2H:640399309-640404446	Horvu_3081_2H01G639800	ATGGAGATTATTGACTTGTGTTCAGATAGTGAGGACGATGTTAAATTGTGTTCAAAAGGCAAAGACATCACTCACCTGTGCTCAGAGGACAGAAAAGACAATGTTGTCCCTATAGATGGAGTTGACTCCTCTCTTCTTTTACTCAACACGCCGTTTGCCAAGAATAATGCACAACAGCCAATCACTTTGGATGATGATGATTGGTTAAGTAGCAATCACGCTTCATGCTCTTATAGATCTCCGGCTGGTTCGTCACACAGGATCTATCCTCTCTCAAGTTCTTCGCTGATGCTATATGATTCCTCATACGGTAAAACCAAGCAGGAAATTGATGATGATGATGATATCTATATGTATTCTGTTCCGCCTCAATCATTTCCAACCAGTCATCCAAGTTTG…	chr2H:624486960-624492110	Horvu_HHOR_2H01G632400	ATGGAGATTATTGACTTGTGTTCAGATAGTGAGGACGATGTTAAATTGTGTTCAAAAGGCAAAGACATCACTCACCTGTGCTCAGAGGACAGAAAAGACAATGTTGTCCCTATAGATGGAGTTGACTCCTCTCTTCTTTTACTCAACACGCCGTTTGCCAAGAATAATGCACAACAGCCAATCACTTTGGATGATGATGATTGGTTAAGTAGCAATCACGCTTCATGCTCTTATAGATCTCCGGCTGGTTCGTCACACAGGATCTATCCTCTCTCAAGTTCTTCGCTGATGCTATATGATTCCTCATACGGTAAAACCAAGCAGGAAATTGATGATGATGATGATATCTATATGTATTCTGTTCCGCCTCAATCATTTCCAACCAGTCATCCAAGTTTG…	chr2H:668568255-668573405	Horvu_7552_2H01G638400	ATGGAGATTATTGACTTGTGTTCAGATAGTGAGGACGATGTTAAATTGTGTTCAAAAGGCAAAGACATCACTCACCTGTGCTCAGAGGACAGAAAAGACAATGTTGTCCCTATAGATGGAGTTGACTCCTCTCTTCTTTTACTCAACACGCCGTTTGCCAAGAATAATGCACAACAGCCAATCACTTTGGATGATGATGATTGGTTAAGTAGCAATCACGCTTCATGCTCTTATAGATCTCCGGCTGGTTCGTCACACAGGATCTATCCTCTCTCAAGTTCTTCGCTGATGCTATATGATTCCTCATACGGTAAAACCAAGCAGGAAATTGATGATGATGATGATATCTATATGTATTCTGTTCCGCCTCAATCATTTCCAACCAGTCATCCAAGTTTG…	chr2H:628063225-628068409	Horvu_8148_2H01G636800	ATGGAGATTATTGACTTGTGTTCAGATAGTGAGGACGATGTTAAATTGTGTTCAAAAGGCAAAGACATCACTCACCTGTGCTCAGAGGACAGAAAAGACAATGTTGTCCCTATAGATGGAGTTGACTCCTCTCTTCTTTTACTCAACACGCCGTTTGCCAAGAATAATGCACAACAGCCAATCACTTTGGATGATGATGATTGGTTAAGTAGCAATCACGCTTCATGCTCTTATAGATCTCCGGCTGGTTCGTCACACAGGATCTATCCTCTCTCAAGTTCTTCGCTGATGCTATATGATTCCTCATACGGTAAAACCAAGCAGGAAATTGATGATGATGATGATATCTATATGTATTCTGTTCCGCCTCAATCATTTCCAACCAGTCATCCAAGTTTG…	chr2H:626935248-626940398	Horvu_9043_2H01G640400	ATGGAGATTATTGACTTGTGTTCAGATAGTGAGGACGATGTTAAATTGTGTTCAAAAGGCAAAGGCATCACTCACCTGTGCTCAGAGGACAGAAAAGACAATGTTGTCCCTATAGATGGAGTTGACTCCTCTCTTCTTTTACTCAACACGCCGTTTGCCAAGAATAATGCACAACAGCCAATCACTTTGGATGATGATGATTGGTTAAGTAGCAATCACGCTTCATGCTCTTATAGATCTCCGGCTGGTTCGTCACACAGGATCTATCCTCTCTCAAGTTCTTCGCTGATGCTATATGATTCCTCATACGGTAAAACCAAGCAGGAAATTGATGATGATGATGATATCTATATGTATTCTGTTCCGCCTCAATCATTTCCAACCAGTCATCCAAGTTTG…	chr2H:638111323-638116469	Horvu_IGRI_2H01G638600	ATGGAGATTATTGACTTGTGTTCAGATAGTGAGGACGATGTTAAATTGTGTTCAAAAGGCAAAGACATCACTCACCTGTGCTCAGAGGACAGAAAAGACAATGTTGTCCCTATAGATGGAGTTGACTCCTCTCTTCTTTTACTCAACACGCCGTTTGCCAAGAATAATGCACAACAGCCAATCACTTTGGATGATGATGATTGGTTAAGTAGCAATCACGCTTCATGCTCTTATAGATCTCCGGCTGGTTCGTCACACAGGATCTATCCTCTCTCAAGTTCTTCGCTGATGCTATATGATTCCTCATACGGTAAAACCAAGCAGGAAATTGATGATGATGATGATATCTATATGTATTCTGTTCCGCCTCAATCATTTCCAACCAGTCATCCAAGTTTG…	chr2H:623209103-623214240	Horvu_OUN333_2H01G634300	ATGGAGATTATTGACTTGTGTTCAGATAGTGAGGACGATGTTAAATTGTGTTCAAAAGGCAAAGGCATCACTCACCTGTGCTCAGAGGACAGAAAAGACAATGTTGTCCCTATAGATGGAGTTGACTCCTCTCTTCTTTTACTCAACACGCCGTTTGCCAAGAATAATGCACAACAGCCAATCACTTTGGATGATGATGATTGGTTAAGTAGCAATCACGCTTCATGCTCTTATAGATCTCCGGCTGGTTCGTCACACAGGATCTATCCTCTCTCAAGTTCTTCGCTGATGCTATATGATTCCTCATACGGTAAAACCAAGCAGGAAATTGATGATGATGATGATATCTATATGTATTCTGTTCCGCCTCAATCATTTCCAACCAGTCATCCAAGTTTG…	chr2H:650137311-650142457
	Ris1_3	HORVU.MOREX.r3.7HG0696030	ATGCTTGCTGGCAGTATGAATAATGATAATGCTAATGTCATTGACTTGATATCGGACAGTGGTGATGATTTTGATTCTGACTCTGACGATCCAACTTCTACAAATGTCACATCTGGCGAGAATGGCGGAGGGCAATCAGTCGTCTTTCAGGATGAAGATTTGTTGAGGAACACTCCCTCTTCTTCCAGATCTAATATAAATGATAATGGCCAATACAGAACTCTGCCCCCTTCCTTTGCAAATGGTATAGACATCGAGAAAGCCCGTTATACACTAGGTTTGGGGGACAGGACTTATCCACATTCAAATTCGTGTGCAGGGCCAAGACACGATTCTGGAAGGGCCTTTCTCTCCTCCAGTAGACTTGATATCGCAGTGAGGGAGCGCAATGGTTTGGCA…	chr7:340000810-340025362	Horvu_AKASHIN_7H01G359500	ACAGACGCGGTGCACATGCTTGCTGGCAGTATGAATAATGATAATGCTAATGTCATTGACTTGATATCGGACAGTGGTGATGATTTTGATTCTGACTCTGACGATCCAACTTCTACAAATGTCACATCTGGCGAGAATGGCGGAGGGCAATCAGTCGTCTTTCAGGATGAAGATTTGTTGAGGAACACTCCCTCTTCTTCCAGATCTAATATAAATGATAATGGCCAATACAGAACTCTGCCCCCTTCCTTTGCAAATGGGCCAAGACACGATTCTGGAAGGGCCTTTCTCTCCTCCAGTAGACTTGATATCGCAGTGAGGGAGCGCAATGGTTTGGCAGTGGATGCAAATGTCAATAACAAAAGGATTCTTCCTTCATCCTTTTCCAATGGAAGCACG…	chr7H:353539043-353562262	Horvu_BARKE_7H01G375500	ACAGACGCGGTGCACATGCTTGCTGGCAGTATGAATAATGATAATGCTAATGTCATTGACTTGATATCGGACAGTGGTGATGATTTTGATTCTGACTCTGACGATCCAACTTCTACAAATGTCACATCTGGCGAGAATGGCGGAGGGCAATCAGTTGTCTTTCAGGATGAAGATTTGTTGAGGAACACTCCCTCTTCTTCCAGATCTAATATAAATGATAATGGCCAATACAGAACTCTGCCCCCTTCCTTTGCAAATGGGCCAAGACACGATTCTGGAAGGGCCTTTCTCTCCTCCAGTAGACTTGATATCGCAGTGAGGGAGCGCAATGGTTTGGCAGTGGATGCAAATGTCAATAACAAAAGGATTCTTCCTTCATCCTTTTCCAATGGAAGCACG…	chr7H:331075671-331102020	Horvu_GOLDEN_7H01G339000	ACAGACGCGGTGCACATGCTTGCTGGCAGTATGAATAATGATAATGCTAATGTCATTGACTTGATATCGGACAGTGGTGATGATTTTGATTCTGACTCTGACGATCCAACTTCTACAAATGTCACATCTGGCGAGAATGGCGGAGGGCAATCAGTTGTCTTTCAGGATGAAGATTTGTTGAGGAACACTCCCTCTTCTTCCAGATCTAATATAAATGATAATGGCCAATACAGAACTCTGCCCCCTTCCTTTGCAAATGGGCCAAGACACGATTCTGGAAGGGCCTTTCTCTCCTCCAGTAGACTTGATATCGCAGTGAGGGAGCGCAATGGTTTGGCAGTGGATGCAAATGTCAATAACAAAAGGATTCTTCCTTCATCCTTTTCCAATGGAAGCACG…	chr7H:310938979-310965293	Horvu_HOCKETT_7H01G355000	ACAGACGCGGTGCACATGCTTGCTGGCAGTATGAATAATGATAATGCTAATGTCATTGACTTGATATCGGACAGTGGTGATGATTTTGATTCTGACTCTGACGATCCAACTTCTACAAATGTCACATCTGGCGAGAATGGCGGAGGGCAATCAGTCGTCTTTCAGGATGAAGATTTGTTGAGGAACACTCCCTCTTCTTCCAGATCTAATATAAATGATAATGGCCAATACAGAACTCTGCCCCCTTCCTTTGCAAATGGGCCAAGACACGATTCTGGAAGGGCCTTTCTCTCCTCCAGTAGACTTGATATCGCAGTGAGGGAGCGCAATGGTTTGGCAGTGGATGCAAATGTCAATAACAAAAGGATTCTTCCTTCATCCTTTTCCAATGGAAGCACG…	chr7H:335052796-335076013	Horvu_10350_7H01G374900	ACAGACGCGGTGCACATGCTTGCTGGCAGTATGAATAATGATAATGCTAATGTCATTGACTTGATATCGGACAGTGGTGATGATTTTGATTCTGACTCTGACGATCCAACTTCTACAAATGTCACATCTGGCGAGAATGGCGGAGGGCAATCAGTCGTCTTTCAGGATGAAGATTTGTTGAGGAACACTCCCTCTTCTTCCAGATCTAATATAAATGATAATGGCCAATACAGAACTCTGCCCCCTTCCTTTGCAAATGGGCCAAGACACGATTCTGGAAGGGCCTTTCTCTCCTCCAGTAGACTTGATATCGCAGTGAGGGAGCGCAATGGTTTGGCAGTGGATGCAAATGTCAATAACAAAAGGATTCTTCCTTCATCCTTTTCCAATGGAAGCACG…	chr7H:333252725-333279255	Horvu_13821_7H01G361400	ACAGACGCGGTGCACATGCTTGCTGGCAGTATGAATAATGATAATGCTAATGTCATTGACTTGATATCGGACAGTGGTGATGATTTTGATTCTGACTCTGACGATCCAACTTCTACAAATGTCACATCTGGCGAGAATGGCGGAGGGCAATCAGTTGTCTTTCAGGATGAAGATTTGTTGAGGAACACTCCCTCTTCTTCCAGATCTAATATAAATGATAATGGCCAATACAGAACTCTGCCCCCTTCCTTTGCAAATGGGCCAAGACACGATTCTGGAAGGGCCTTTCTCTCCTCCAGTAGACTTGATATCGCAGTGAGGGAGCGCAATGGTTTGGCAGTGGATGCAAATGTCAATAACAAAAGGATTCTTCCTTCATCCTTTTCCAATGGAAGCACG…	chr7H:344769201-344796327	Horvu_13942_7H01G359600	ACAGACGCGGTGCACATGCTTGCTGGCAGTATGAATAATGATAATGCTAATGTCATTGACTTGATATCGGACAGTGGTGATGATTTTGATTCTGACTCTGACGATCCAACTTCTACAAATGTCACATCTGGCGAGAATGGCGGAGGGCAATCAGTCGTCTTTCAGGATGAAGATTTGTTGAGGAACACTCCCTCTTCTTCCAGATCTAATATAAATGATAATGGCCAATACAGAACTCTGCCCCCTTCCTTTGCAAATGGGCCAAGACACGATTCTGGAAGGGCCTTTCTCTCCTCCAGTAGACTTGATATCGCAGTGAGGGAGCGCAATGGTTTGGCAGTGGATGCAAATGTCAATAACAAAAGGATTCTTCCTTCATCCTTTTCCAATGGAAGCACG…	chr7H:338633022-338656241	Horvu_21599_7H01G365200	ACAGACGCGGTGCACATGCTTGCTGGCAGTATGAATAATGATAATGCTAATGTCATTGACTTGATATCGGACAGTGGTGATGATTTTGATTCTGACTCTGACGATCCAACTTCTACAAATGTCACATCTGGCGAGAATGGCGGAGGGCAATCAGTCGTCTTTCAGGATGAAGATTTGTTGAGGAACACTCCCTCTTCTTCCAGATCTAATATAAATGATAATGGCCAATACAGAACTCTGCCCCCTTCCTTTGCAAATGGGCCAAGACACGATTCTGGAAGGGCCTTTCTCTCCTCCAGTAGACTTGATATCGCAGTGAGGGAGCGCAATGGTTTGGCAGTGGATGCAAATGTCAATAACAAAAGGATTCTTCCTTCATCCTTTTCCAATGGAAGCACG…	chr7H:329095357-329123890	Horvu_3081_7H01G369500	ACAGACGCGGTGCACATGCTTGCTGGCAGTATGAATAATGATAATGCTAATGTCATTGACTTGATATCGGACAGTGGTGATGATTTTGATTCTGACTCTGACGATCCAACTTCTACAAATGTCACATCTGGCGAGAATGGCGGAGGGCAATCAGTCGTCTTTCAGGATGAAGATTTGTTGAGGAACACTCCCTCTTCTTCCAGATCTAATATAAATGATAATGGCCAATACAGAACTCTGCCCCCTTCCTTTGCAAATGGGCCAAGACACGATTCTGGAAGGGCCTTTCTCTCCTCCAGTAGACTTGATATCGCAGTGAGGGAGCGCAATGGTTTGGCAGTGGATGCAAATGTCAATAACAAAAGGATTCTTCCTTCATCCTTTTCCAATGGAAGCACG…	chr7H:340312243-340335460	Horvu_HHOR_7H01G363200	ACAGACGCGGTGCACATGCTTGCTGGCAGTATGAATAATGATAATGCTAATGTCATTGACTTGATATCGGACAGTGGTGATGATTTTGATTCTGACTCTGACGATCCAACTTCTACAAATGTCACATCTGGCGAGAATGGCGGAGGGCAATCAGTCGTCTTTCAGGATGAAGATTTGTTGAGGAACACTCCCTCTTCTTCCAGATCTAATATAAATGATAATGGCCAATACAGAACTCTGCCCCCTTCCTTTGCAAATGGGCCAAGACACGATTCTGGAAGGGCCTTTCTCTCCTCCAGTAGACTTGATATCGCAGTGAGGGAGCGCAATGGTTTGGCAGTGGATGCAAATGTCAATAACAAAAGGATTCTTCCTTCATCCTTTTCCAATGGAAGCACG…	chr7H:364202049-364225266	Horvu_7552_7H01G364100	ACAGACGCGGTGCACATGCTTGCTGGCAGTATGAATAATGATAATGCTAATGTCATTGACTTGATATCGGACAGTGGTGATGATTTTGATTCTGACTCTGACGATCCAACTTCTACAAATGTCACATCTGGCGAGAATGGCGGAGGGCAATCAGTCGTCTTTCAGGATGAAGATTTGTTGAGGAACACTCCCTCTTCTTCCAGATCTAATATAAATGATAATGGCCAATACAGAACTCTGCCCCCTTCCTTTGCAAATGGGCCAAGACACGATTCTGGAAGGGCCTCTCTCTCCTCCAGTAGACTTGATATCGCAGTGAGGGAGCGCAATGGTTTGGCAGTGGATGCAAATGTCAATAACAAAAGGATTCTTCCTTCATCCTTTTCCAATGGAAGCACG…	chr7H:341859193-341883858	Horvu_8148_7H01G363500	ACAGACGCGGTGCACATGCTTGCTGGCAGTATGAATAATGATAATGCTAATGTCATTGACTTGATATCGGACAGTGGTGATGATTTTGATTCTGACTCTGACGATCCAACTTCTACAAATGTCACATCTGGCGAGAATGGCGGAGGGCAATCAGTTGTCTTTCAGGATGAAGATTTGTTGAGGAACACTCCCTCTTCTTCCAGATCTAATATAAATGATAATGGCCAATACAGAACTCTGCCCCCTTCCTTTGCAAATGGGCCAAGACACGATTCTGGAAGGGCCTTTCTCTCCTCCAGTAGACTTGATATCGCAGTGAGGGAGCGCAATGGTTTGGCAGTGGATGCAAATGTCAATAACAAAAGGATTCTTCCTTCATCCTTTTCCAATGGAAGCACG…	chr7H:336382404-336409141	Horvu_9043_7H01G368400	ACAGACGCGGTGCACATGCTTGCTGGCAGTATGAATAATGATAATGCTAATGTCATTGACTTGATATCGGACAGTGGTGATGATTTTGATTCTGACTCTGACGATCCAACTTCTACAAATGTCACATCTGGCGAGAATGGCGGAGGGCAATCAGTCGTCTTTCAGGATGAAGATTTGTTGAGGAACACTCCCTCTTCTTCCAGATCTAATATAAATGATAATGGCCAATACAGAACTCTGCCCCCTTCCTTTGCAAATGGGCCAAGACACGATTCTGGAAGGGCCTTTCTCTCCTCCAGTAGACTTGATATCGCAGTGAGGGAGCGCAATGGTTTGGCAGTGGATGCAAATGTCAATAACAAAAGGATTCTTCCTTCATCCTTTTCCAATGGAAGCACG…	chr7H:345756386-345782773	Horvu_IGRI_7H01G363600	ACAGACGCGGTGCACATGCTTGCTGGCAGTATGAATAATGATAATGCTAATGTCATTGACTTGATATCGGACAGTGGTGATGATTTTGATTCTGACTCTGACGATCCAACTTCTACAAATGTCACATCTGGCGAGAATGGCGGAGGGCAATCAGTTGTCTTTCAGGATGAAGATTTGTTGAGGAACACTCCCTCTTCTTCCAGATCTAATATAAATGATAATGGCCAATACAGAACTCTGCCCCCTTCCTTTGCAAATGGGCCAAGACACGATTCTGGAAGGGCCTTTCTCTCCTCCAGTAGACTTGATATCGCAGTGAGGGAGCGCAATGGTTTGGCAGTGGATGCAAATGTCAATAACAAAAGGATTCTTCCTTCATCCTTTTCCAATGGAAGCACG…	chr7H:336836198-336862518	Horvu_OUN333_7H01G371200	ACAGACGCGGTGCACATGCTTGCTGGCAGTATGAATAATGATAATGCTAATGTCATTGACTTGATATCGGACAGTGGTGATGATTTTGATTCTGACTCTGACGATCCAACTTCTACAAATGTCACATCTGGCGAGAATGGCGGAGGGCAATCAGTCGTCTTTCAGGATGAAGATTTGTTGAGGAACACTCCCTCTTCTTCCAGATCTAATATAAATGATAATGGCCAATACAGAACTCTGCCCCCTTCCTTTGCAAATGGGCCAAGACACGATTCTGGAAGGGCCTTTCTCTCCTCCAGTAGACTTGATATCGCAGTGAGGGAGCGCAATGGTTTGGCAGTGGATGCAAATGTCAATAACAAAAGGATTCTTCCTTCATCCTTTTCCAATGGAAGCACG…	chr7H:355967138-355990357
	SHPRH	HORVU.MOREX.r3.3HG0320710	ATGGCCGTGGTCGTGGCTGCGGGCGGCGGGGACGCCGCGCCCGCGCACCGGAGGCTGGGCGGGTACCTCCGCGCGGTGGTCTCCGTCCCGGCCGCCGACTCCAAATCCCTCCGCCCGCTCGCCCCCTGCCCGCTCTCCGCCTGCGCGCCGCTCCCCGACGACGCGACCGGCGGGCGCGCGGGCCTCGCCCCGCGGGGGCCGGCCAAGTGGCGGGCCACCGGCGGCGGGGGCACCAGCGTCGTGCGCCACCTGCGGGCCCTCGTCGCCGCGCGCTGCGTCGAGGTGGAGGGCAGGGTGCTCCGCGTCGTGACGCGGGACGCGGAGGAGGAGGCCAGGGCGGTGGTGCTCGTCGACGTGTACCTCCCCGTCGCCGCCTGGTCCGGCTGGCAGTTCCCGCGC…	chr3:597709276-597715274	Horvu_AKASHIN_3H01G635400	ATGGCCGTGGTCGTGGCTGCGGGCGGCGGGGACGCCGCGCCCGCGCACCGGAGGCTGGGCGGGTACCTCCGCGCGGTGGTCTCCGTCCCGGCCGCCGACTCCAAATCCCTCCGCCCGCTTGCCCCCTGCCCGCTCTCCGCCTGCGCGCCGCTCCCCGACGACGCGGCCGGCGGGCGCGCGGGCCTCGCCCCGCGGGGGCCGGCCAAGTGGCGGGCCACCGGCGGCGGCGGCACCAGCGTCGTGCGCCACCTGCGGGCCCTCGTCGCCGCGCGCTGCGTCGAGGTGGAGGGCAGGGTGCTCCGCGTCGTGACGCGGGGCGCGGAGGAGGAGGCCAGGGCGGTGGTGCTCGTCGACGTGTACCTCCCCGTCGCCGCCTGGTCCGGGTGGCAGTTCCCGCGC…	chr3H:631617095-631623094	Horvu_BARKE_3H01G643800	ATGGCCGTGGTCGTGGCTGCGGGCGGCGGGGACGCCGCGCCCGCGCACCGGAGGCTGGGCGGGTACCTCCGCGCGGTGGTCTCCGTCCCGGCCGCCGACTCCAAATCCCTCCGCCCGCTCGCCCCCTGCCCGCTCTCCGCCTGCGCGCCGCTCCCCGACGACGCGACCGGCGGGCGCGCGGGCCTCGCCCCGCGGGGGCCGGCCAAGTGGCGGGCCACCGGCGGCGGGGGCACCAGCGTCGTGCGCCACCTGCGGGCCCTCGTCGCCGCGCGCTGCGTCGAGGTGGAGGGCAGGGTGCTCCGCGTCGTGACGCGGGACGCGGAGGAGGAGGCCAGGGCGGTGGTGCTCGTCGACGTGTACCTCCCCGTCGCCGCCTGGTCCGGCTGGCAGTTCCCGCGC…	chr3H:594650582-594656580	Horvu_GOLDEN_3H01G600300	ATGGCCGTGGTCGTGGCTGCGGGCGGCGGGGACGCCGCGCCCGCGCACCGGAGGCTGGGCGGGTACCTCCGCGCGGTGGTCTCCGTCCCGGCCGCCGACTCCAAATCCCTCCGCCCGCTCGCCCCCTGCCCGCTCTCCGCCTGCGCGCCGCTCCCCGACGACGCGACCGGCGGGCGCGCGGGCCTCGCCCCGCGGGGGCCGGCCAAGTGGCGGGCCACCGGCGGCGGGGGCACCAGCGTCGTGCGCCACCTGCGGGCCCTCGTCGCCGCGCGCTGCGTCGAGGTGGAGGGCAGGGTGCTCCGCGTCGTGACGCGGGACGCGGAGGAGGAGGCCAGGGCGGTGGTGCTCGTCGACGTGTACCTCCCCGTCGCCGCCTGGTCCGGCTGGCAGTTCCCGCGC…	chr3H:557571940-557577938	Horvu_HOCKETT_3H01G626100	ATGGCCGTGGTCGTGGCTGCGGGCGGCGGGGACGCCGCGCCCGCGCACCGGAGGCTGGGCGGGTACCTCCGCGCGGTGGTCTCCGTCCCGGCCGCCGACTCCAAATCCCTCCGCCCGCTCGCCCCCTGCCCGCTCTCCGCCTGCGCGCCGCTCCCCGACGACGCGACCGGCGGGCGCGCGGGCCTCGCCCCGCGGGGGCCGGCCAAGTGGCGGGCCACCGGCGGCGGGGGCACCAGCGTCGTGCGCCACCTGCGGGCCCTCGTCGCCGCGCGCTGCGTCGAGGTGGAGGGCAGGGTGCTCCGCGTCGTGACGCGGGACGCGGAGGAGGAGGCCAGGGCGGTGGTGCTCGTCGACGTGTACCTCCCCGTCGCCGCCTGGTCCGGCTGGCAGTTCCCGCGC…	chr3H:579896810-579902808	Horvu_10350_3H01G642000	ATGGCCGTGGTCGTGGCTGCGGGCGGCGGGGACGCCGCGCCCGCGCACCGGAGGCTGGGCGGGTACCTCCGCGCGGTGGTCTCCGTCCCGGCCGCCGACTCCAAATCCCTCCGCCCGCTCGACCCCTGCCCGCTCTCCGCCTGCGCGCCGCTCCCCGACGACGCGGCCGGCGGGCGCGCGGGCCTCGCCCCGCGGGGGCCGGCCAAGTGGCGGGCCACCGGCGGCGGCGGCACCAGCGTCGTGCGCCACCTGCGGGCCCTCGTCGCCGCGCGCTGCGTCGAGGTGGAGGGAAGGGTGCTCCGCGTCGTGACGCGGGGCGCGGAGGAGGAGGCCAGGGCGGTGGTGCTCGTCGACGTGTACCTCCCCGTCGCCGCCTGGTCCGGGTGGCAGTTCCCGCGC…	chr3H:593444607-593450607	Horvu_13821_3H01G623700	ATGGCCGTGGTCGTGGCTGCGGGCGGCGGGGACGCCGCGCCCGCGCACCGGAGGCTGGGCGGGTACCTCCGCGCGGTGGTCTCCGTCCCGGCCGCCGACTCCAAATCCCTCCGCCCGCTCGCCCCCTGCCCGCTCTCCGCCTGCGCGCCGCTCCCCGACGACGCGACCGGCGGGCGCGCGGGCCTCGCCCCGCGGGGGCCGGCCAAGTGGCGGGCCACCGGCGGCGGGGGCACCAGCGTCGTGCGCCACCTGCGGGCCCTCGTCGCCGCGCGCTGCGTCGAGGTGGAGGGCAGGGTGCTCCGCGTCGTGACGCGGGACGCGGAGGAGGAGGCCAGGGCGGTGGTGCTCGTCGACGTGTACCTCCCCGTCGCCGCCTGGTCCGGCTGGCAGTTCCCGCGC…	chr3H:616651785-616657783	Horvu_13942_3H01G634700	ATGGCCGTGGTCGTGGCTGCGGGCGGCGGGGACGCCGCGCCCGCGCACCGGAGGCTGGGCGGGTACCTCCGCGCGGTGGTCTCCGTCCCGGCCGCCGACTCCAAATCCCTCCGCCCGCTCGCCCCCTGCCCGCTCTCCGCCTGCGCGCCGCTCCCCGACGACGCGGCCGGCGGGCGCGCGGGCCTCGCTCCGCGGGGGCCGGCCAAGTGGCGGGCCACCGGCGGCGGGGGCACCAGCGTCGTGCGCCACCTGCGGGCCCTCGTCGCCGCGCGCTGCGTCGAGGTGGAGGGCAGGGTGCTCCGGGTCGTGTCCAGGGGGGCGGAGGAGGAGGCCAGGGCGGTGGTGCTCGTCGACGTGTACCTCCCCGTCGCCGCCTGGTCCGGCTGGCAGTTCCCGCGC…	chr3H:611467315-611473312	Horvu_21599_3H01G642500	ATGGCCGTGGTCGTGGCTGCGGGCGGCGGGGACGCCGCGCCCGCGCACCGGAGGCTGGGCGGGTACCTCCGCGCGGTGGTCTCCGTCCCGGCCGCCGACTCCAAATCCCTCCGCCCGCTCGCCCCCTGCCCGCTCTCCGCCTGCGCGCCGCTCCCCGACGACGCGGCCGGCGGGCGCGCGGGCCTCGCTCCGCGGGGGCCGGCCAAGTGGCGGGCCACCGGCGGCGGGGGCACCAGCGTCGTGCGCCACCTGCGGGCCCTCGTCGCCGCGCGCTGCGTCGAGGTGGAGGGCAGGGTGCTCCGGGTCGTGTCCAGGGGGGCGGAGGAGGAGGCCAGGGCGGTGGTGCTCGTCGACGTGTACCTCCCCGTCGCCGCCTGGTCCGGCTGGCAGTTCCCGCGC…	chr3H:628466792-628472789	Horvu_3081_3H01G635200	ATGGCCGTGGTCGTGGCTGCGGGCGGCGGGGACGCCGCGCCCGCGCACCGGAGGCTGGGCGGGTACCTCCGCGCGGTGGTCTCCGTCCCGGCCGCCGACTCCAAATCCCTCCGCCCGCTCGCCCCCTGCCCGCTCTCCGCCTGCGCGCCGCTCCCCGACGGCGCGGCCGGCGGGCGCGCGGGCCTCGCTCCGCGGGGGCCGGCCAAGTGGCGGGCCACCGGCGGCGGGGGCACCAGCGTCGTGCGCCACCTGCGGGCCCTCGTCGCCGCGCGCTGCGTCGAGGTGGAGGGAAGGGTGCTCCGCGTCGTGACGCGGGGCGCGGAGGAGGAGGCCAGGGCGGTGGTGCTCGTCGACGTGTACCTCCCCGTCGCCGCCTGGTCCGGCTGGCAGTTCCCGCGC…	chr3H:611119950-611125948	Horvu_HHOR_3H01G627100	ATGGCCGTGGTCGTGGCTGCGGGCGGCGGGGACGCCGCGCCCGCGCACCGGAGGCTGGGCGGGTACCTCCGCGCGGTGGTCTCCGTCCCGGCCGCCGACTCCAAATCCCTCCGCCCGCTCGCCCCCTGCCCGCTCTCCGCCTGCGCGCCGCTCCCCGACGACGCGACCGGCGGGCGCGCGGGCCTCGCCCCGCGGGGGCCGGCCAAGTGGCGGGCCACCGGCGGCGGGGGCACCAGCGTCGTGCGCCACCTGCGGGCCCTCGTCGCCGCGCGCTGCGTCGAGGTGGAGGGCAGGGTGCTCCGCGTCGTGACGCGGGACGCGGAGGAGGAGGCCAGGGCGGTGGTGCTCGTCGACGTGTACCTCCCCGTCGCCGCCTGGTCCGGCTGGCAGTTCCCGCGC…	chr3H:648470774-648476772	Horvu_7552_3H01G645500	ATGGCCGTGGTCGTGGCTGCGGGCGGCGGGGACGCCGCGCCCGCGCACCGGAGGCTGGGCGGGTACCTCCGCGCGGTGGTCTCCGTCCCGGCCGCCGACTCCAAATCCCTCCGCCCGCTTGCCCCCTGCCCGCTCTCCGCCTGCGCGCCGCTCCCCGACGACGCGGCCGGCGGGCGCGCGGGCCTCGCCCCGCGGGGGCCGGCCAAGTGGCGGGCCACCGGCGGCGGCGGCACCAGCGTCGTGCGCCACCTGCGGGCCCTCGTCGCCGCGCGCTGCGTCGAGGTGGAGGGCAGGGTGCTCCGCGTCGTGACGCGGGGCGCGGAGGAGGAGGCCAGGGCGGTGGTGCTCGTCGACGTGTACCTCCCCGTCGCCGCCTGGTCCGGGTGGCAGTTCCCGCGC…	chr3H:610991498-610997497	Horvu_8148_3H01G640800	ATGGCCGTGGTCGTGGCTGCGGGCGGCGGGGACGCCGCGCCCGCGCACCGGAGGCTGGGCGGGTACCTCCGCGCGGTGGTCTCCGTCCCGGCCGCCGACTCCAAATCCCTCCGCCCGCTCGCCCCCTGCCCGCTCTCCGCCTGCGCGCCGCTCCCCGACGGCGCGGCCGGCGGGCGCGCGGGCCTCGCTCCGCGGGGGCCGGCCAAGTGGCGGGCCACCGGCGGCGGGGGCACCAGCGTCGTGCGCCACCTGCGGGCCCTCGTCGCCGCGCGCTGCGTCGAGGTGGAGGGAAGGGTGCTCCGCGTCGTGACGCGGGGCGCGGAGGAGGAGGCCAGGGCGGTGGTGCTCGTCGACGTGTACCTCCCCGTCGCCGCCTGGTCCGGCTGGCAGTTCCCGCGC…	chr3H:610208617-610214615	Horvu_9043_3H01G635000	ATGGCCGTGGTCGTGGCTGCGGGCGGCGGGGACGCCGCGCCCGCGCACCGGAGGCTGGGCGGGTACCTCCGCGCGGTGGTCTCCGTCCCGGCCGCCGACTCCAAATCCCTCCGCCCGCTCGCCCCCTGCCCGCTCTCCGCCTGCGCGCCGCTCCCCGACGACGCGACCGGCGGGCGCGCGGGCCTCGCCCCGCGGGGGCCGGCCAAGTGGCGGGCCACCGGCGGCGGGGGCACCAGCGTCGTGCGCCACCTGCGGGCCCTCGTCGCCGCGCGCTGCGTCGAGGTGGAGGGCAGGGTGCTCCGCGTCGTGACGCGGGACGCGGAGGAGGAGGCCAGGGCGGTGGTGCTCGTCGACGTGTACCTCCCCGTCGCCGCCTGGTCCGGCTGGCAGTTCCCGCGC…	chr3H:614181953-614187951	Horvu_IGRI_3H01G634900	ATGGCCGTGGTCGTGGCCGCGGGCGGCGGGGACGCCGCGCCCGCGCACCGGAGGCTGGGCGGGTACCTCCGCGCGGTGGTCTCCGTCCCTGCCGCCGACTCCAAATCCCTCCGCCCGCTCGCCCCCTGCCCGCTCTCCGCCTGCGCGCCGCTCCCCGACGACGCGGCCGGCGGGCGCGCGGGCCTCGCTCCGCGGGGGCCGGCCAAGTGGCGGGCCACCGGCGGCGGGGGCACCAGCGTCGTGCGCCACCTGCGGGCCCTCGTCGCCGCGCGCTGCGTCGAGGTTGAGGGCAGGGTGCTCCGGGTCGTGTCCAGGGGGGCGGAGGAGGAGGCCAGGGCGGTGGTGCTCGTCGACGTGTACCTCCCCGTCGCCGCCTGGTCCGGCTGGCAGTTCCCGCGC…	chr3H:603454687-603460685	Horvu_OUN333_3H01G640100	ATGGCCGTGGTCGTGGCTGCGGGCGGCGGGGACGCCGCGCCCGCGCACCGGAGGCTGGGCGGGTACCTCCGCGCGGTGGTCTCCGTCCCGGCCGCCGACTCCAAATCCCTCCGCCCGCTCGCCCCCTGCCCGCTCTCCGCCTGCGCGCCGCTCCCCGACGACGCGGCCGGCGGGCGCGCGGGCCTCGCCCCGCGGGGGCCGGCCAAGTGGCGGGCCACCGGCGGCGGGGGCACCAGCGTCGTGCGCCACCTGCGGGCCCTCGTCGCCGCGCGCTGCGTCGAGGTGGAGGGCAGGGTGCTCCGCGTCGTGACGCGGGGCGCGGAGGAGGAGGCCAGGGCGGTGGTGCTCGTCGACGTGTACCTCCCCGTCGCCGCCTGGTCCGGCTGGCAGTTCCCGCGC…	chr3H:633063928-633069923
SSO1653-like	Mot1	HORVU.MOREX.r3.1HG0094930	ATGGCCGCGCAGAGCTCCTCCCGCCTTCACCGCCTCCTCACATTGCTCGACACCGGTTCGACACAAGCCACAAGGTCCGCGGCCGCGCGCCAGATCGGAGAAATCGCAAAGACACATCCACAGGAGCTAAATGCTCTGTTGAAAAAGGTTTCTCAGTACCTTCGTAGTAAGAATTGGGACACAAGGGTTGCTGCAGCTCAGGCGATCGGTGCCATAGCAGAGAATGTCAAGCACACGACAGTCAAGGACTTGTTTGCAGCCGTGGAAGCAGAAAAACATGCTTCCGGGTTATCTGATGAAACTGGTGATGTTGGGTCAGCATTGCCACTTCCTGATACTACTGCAACATCTGAGCTTGCTTTTGGAAGCTTTGATATAAACAGGGTACTGGAATTTGGG…	chr1:514900094-514913509	Horvu_AKASHIN_1H01G589400	ATGGCCGCGCAGAGCTCCTCCCGCCTTCACCGCCTCCTCACATTGCTCGACACCGGTTCGACACAAGCCACAAGGTTCGCGGCCGCGCGCCAGATCGGAGAAATCGCAAAGACACATCCACAGGAGCTAAATGCTCTGTTGAAAAAGGTTTCTCAGTACCTTCGTAGTAAGAATTGGGACACAAGGGTTGCTGCAGCTCAGGCGATCGGTGCCATAGCAGAGAATGTCAAGCACACGACAGTCAAGGACTTGTTTGCAGCCGTGGAAGCAGAAAAACATGCTTCCGGGTTATCTGATGAAACTGGTGATGTTGGGTCAGCATTGCCACTTCCTGATACTACTGCAACATCTGAGCTTGCTTTTGGAAGCTTTGATATAAACAGGGTACTGGAATTTGGG…	chr1H:539780612-539793693	Horvu_BARKE_1H01G612100	ATGGCCGCGCAGAGCTCCTCCCGCCTTCACCGCCTCCTCACATTGCTCGACACCGGTTCGACACAAGCCACAAGGTTCGCGGCCGCGCGCCAGATCGGAGAAATCGCAAAGACACATCCACAGGAGCTAAATGCTCTGTTGAAAAAGGTTTCTCAGTACCTTCGTAGTAAGAATTGGGACACAAGGGTTGCTGCAGCTCAGGCGATCGGTGCCATAGCAGAGAATGTCAAGCACACGACAGTCAAGGACTTGTTTGCAGCCATGGAAGCAGAAAAACATGCTTCCGGGTTATCTGATGAAACTGGTGATGTTGGGTCAGCATTGCCACTTCCTGATACTACTGCAACATCTGAGCTTGCTTTTGGAAGCTTTGATATAAACAGGGTACTGGAATTTGGG…	chr1H:511576945-511590001	Horvu_GOLDEN_1H01G535900	ATGGCCGCGCAGAGCTCCTCCCGCCTTCACCGCCTCCTCACATTGCTCGACACCGGTTCGACACAAGCCACAAGGTTCGCGGCCGCGCGCCAGATCGGAGAAATCGCAAAGACACATCCACAGGAGCTAAATGCTCTGTTGAAAAAGGTTTCTCAGTACCTTCGTAGTAAGAATTGGGACACAAGGGTTGCTGCAGCTCAGGCGATCGGTGCCATAGCAGAGAATGTCAAGCACACGACAGTCAAGGACTTGTTTGCAGCCATGGAAGCAGAAAAACATGCTTCCGGGTTATCTGATGAAACTGGTGATGTTGGGTCAGCATTGCCACTTCCTGATACTACTGCAACATCTGAGCTTGCTTTTGGAAGCTTTGATATAAACAGGGTACTGGAATTTGGG…	chr1H:473388974-473402030	Horvu_HOCKETT_1H01G572400	ATGAGAATGTGTGCAGCCAACAATCTCCCTTTCTCCGTCCCTTGTCTTACACATCTCCCCGACGACGACCTCCACGACCCTGCAGCTGCAGGTATCATCGATCGCCGTCCAACTACCTGTCAATCGAGTTCCGTCCATCCATCGGTACGGTGCCTAGTAGCTCGATCGCCTTCCGTTCCGTACGTGCACGCAGACCCTCGGCAGATGGGCATGAGGAAGGTGAGGCTGCCCGGCCGCCGGCGCCTGTGCAAGCTCGGCGACCTCTCTTCCGACGACGACGACCAGCCCGATGTTGCCAGCTGCGAGACGGAGGAGCCCACCGAAGTATTTTCCGACTTCAGAGATGACGATGACGAGAACCACCGCGACACCGACACGGACGAGTGGGAGGAGGCGGAG…	chr1H:494975672-494988723	Horvu_10350_1H01G603800	ATGGCCGCGCAGAGCTCCTCCCGCCTTCACCGCCTCCTCACATTGCTCGACACCGGTTCGACACAAGCCACAAGGTTCGCGGCCGCGCGCCAGATCGGAGAAATCGCAAAGACACATCCACAGGAGCTAAATGCTCTGTTGAAAAAGGTTTCTCAGTACCTTCGTAGTAAGAATTGGGACACAAGGGTTGCTGCAGCTCAGGCGATCGGTGCCATAGCAGAGAATGTCAAGCACACGACAGTCAAGGACTTGTTTGCAGCCGTGGAAGCAGAAAAACATGCTTCCGGGTTATCTGATGAAACTGGTGATGTTGGGTCAGCATTGCCACTTCCTGATACTACTGCAACATCTGAGCTTGCTTTTGGAAGCTTTGATATAAACAGGGTACTGGAATTTGGG…	chr1H:511225948-511239163	Horvu_13821_1H01G589600	ATGGCCGCGCAGAGCTCCTCCCGCCTTCACCGCCTCCTCACATTGCTCGACACCGGTTCGACACAAGCCACAAGGTTCGCGGCCGCGCGCCAGATCGGAGAAATCGCAAAGACACATCCACAGGAGCTAAATGCTCTGTTGAAAAAGGTTTCTCAGTACCTTCGTAGTAAGAATTGGGACACAAGGGTTGCTGCAGCTCAGGCGATCGGTGCCATAGCAGAGAATGTCAAGCACACGACAGTCAAGGACTTGTTTGCAGCCGTGGAAGCAGAAAAACATGCTTCCGGGTTATCTGATGAAACTGGTGATGTTGGGTCAGCATTGCCACTTCCTGATACTACTGCAACATCTGAGCTTGCTTTTGGAAGCTTTGATATAAACAGGGTACTGGAATTTGGG…	chr1H:534642886-534656021	Horvu_13942_1H01G581700	ATGGCCGCGCAGAGCTCCTCCCGCCTTCACCGCCTCCTCACATTGCTCGACACCGGTTCGACACAAGCCACAAGGTCCGCGGCCGCGCGCCAGATCGGAGAAATCGCAAAGACACATCCACAGGAGCTAAATGCTCTGTTGAAAAAGGTTTCTCAGTACCTTCGTAGTAAGAATTGGGACACAAGGGTTGCTGCAGCTCAGGCGATCGGTGCCATAGCAGAGAATGTCAAGCACACGACAGTCAAGGACTTGTTTGCAGCCGTGGAAGCAGAAAAACATGCTTCCGGGTTATCTGATGAAACTGGTGATGTTGGGTCAGCATTGCCACTTCCTGATACTACTGCAACATCTGAGCTTGCTTTTGGAAGCTTTGATATAAACAGGGTACTGGAATTTGGG…	chr1H:521132235-521145286	Horvu_21599_1H01G585700	ATGGCCGCGCAGAGCTCCTCCCGCCTTCACCGCCTCCTCACATTGCTCGACACCGGTTCGACACAAGCCACAAGGTCCGCGGCCGCGCGCCAGATCGGAGAAATCGCAAAGACACATCCACAGGAGCTAAATGCTCTGTTGAAAAAGGTTTCTCAGTACCTTCGTAGTAAGAATTGGGACACAAGGGTTGCTGCAGCTCAGGCGATCGGTGCCATAGCAGAGAATGTCAAGCACACGACAGTCAAGGACTTGTTTGCAGCCGTGGAAGCAGAAAAACATGCTTCCGGGTTATCTGATGAAACTGGTGATGTTGGGTCAGCATTGCCACTTCCTGATACTACTGCAACATCTGAGCTTGCTTTTGGAAGCTTTGATATAAACAGGGTACTGGAATTTGGG…	chr1H:535559495-535572546	Horvu_3081_1H01G593200	ATGGCCGCGCAGAGCTCCTCCCGCCTTCACCGCCTCCTCACATTGCTCGACACCGGTTCGACACAAGCCACAAGGTTCGCGGCCGCGCGCCAGATCGGAGAAATCGCAAAGACACATCCACAGGAGCTAAATGCTCTGTTGAAAAAGGTTTCTCAGTACCTTCGTAGTAAGAATTGGGACACAAGGGTTGCTGCAGCTCAGGCGATCGGTGCCATAGCAGAGAATGTCAAGCACACGACAGTCAAGGACTTGTTTGCAGCCATGGAAGCAGAAAAACATGCTTCCGGGTTATCTGATGAAACTGGTGATGTTGGGTCAGCATTGCCACTTCCTGATACTACTGCAACATCTGAGCTTGCTTTTGGAAGCTTTGATATAAACAGGGTACTGGAATTTGGG…	chr1H:519395514-519408650	Horvu_HHOR_1H01G588900	ATGGCCGCGCAGAGCTCCTCCCGCCTTCACCGCCTCCTCACATTGCTCGACACCGGTTCGACACAAGCCACAAGGTTCGCGGCCGCGCGCCAGATCGGAGAAATCGCAAAGACACATCCACAGGAGCTAAATGCTCTGTTGAAAAAGGTTTCTCAGTACCTTCGTAGTAAGAATTGGGACACAAGGGTTGCTGCAGCTCAGGCGATCGGTGCCATAGCAGAGAATGTCAAGCACACGACAGTCAAGGACTTGTTTGCAGCCGTGGAAGCAGAAAAACATGCTTCCGGGTTATCTGATGAAACTGGTGATGTTGGGTCAGCATTGCCACTTCCTGATACTACTGCAACATCTGAGCTTGCTTTTGGAAGCTTTGATATAAACAGGGTACTGGAATTTGGG…	chr1H:557557821-557575144	Horvu_7552_1H01G590300	ATGGCCGCGCAGAGCTCCTCCCGCCTTCACCGCCTCCTCACATTGCTCGACACCGGTTCGACACAAGCCACAAGGTTCGCGGCCGCGCGCCAGATCGGAGAAATCGCAAAGACACATCCACAGGAGCTAAATGCTCTGTTGAAAAAGGTTTCTCAGTACCTTCGTAGTAAGAATTGGGACACAAGGGTTGCTGCAGCTCAGGCGATCGGTGCCATAGCAGAGAATGTCAAGCACACGACAGTCAAGGACTTGTTTGCAGCCGTGGAAGCAGAAAAACATGCTTCCGGGTTATCTGATGAAACTGGTGATGTTGGGTCAGCATTGCCACTTCCTGATACTACTGCAACATCTGAGCTTGCTTTTGGAAGCTTTGATATAAACAGGGTACTGGAATTTGGG…	chr1H:520268018-520281153	Horvu_8148_1H01G589100	ATGGCCGCGCAGAGCTCCTCCCGCCTTCACCGCCTCCTCACATTGCTCGACACCGGTTCGACACAAGCCACAAGGTTCGCGGCCGCGCGCCAGATCGGAGAAATCGCAAAGACACATCCACAGGAGCTAAATGCTCTGTTGAAAAAGGTTTCTCAGTACCTTCGTAGTAAGAATTGGGACACAAGGGTTGCTGCAGCTCAGGCGATCGGTGCCATAGCAGAGAATGTCAAGCACACGACAGTCAAGGACTTGTTTGCAGCCGTGGAAGCAGAAAAACATGCTTCCGGGTTATCTGATGAAACTGGTGATGTTGGGTCAGCATTGCCACTTCCTGATACTACTGCAACATCTGAGCTTGCTTTTGGAAGCTTTGATATAAACAGGGTACTGGAATTTGGG…	chr1H:522529115-522542290	Horvu_9043_1H01G589500	ATGGCCGCGCAGAGCTCCTCCCGCCTTCACCGCCTCCTCACATTGCTCGACACCGGTTCGACACAAGCCACAAGGTCCGCGGCCGCGCGCCAGATCGGAGAAATCGCAAAGACACATCCACAGGAGCTAAATGCTCTGTTGAAAAAGGTTTCTCAGTACCTTCGTAGTAAGAATTGGGACACAAGGGTTGCTGCAGCTCAGGCGATCGGTGCCATAGCAGAGAATGTCAAGCACACGACAGTCAAGGACTTGTTTGCAGCCGTGGAAGCAGAAAAACATGCTTCCGGGTTATCTGATGAAACTGGTGATGTTGGGTCAGCATTGCCACTTCCTGATACTACTGCAACATCTGAGCTTGCTTTTGGAAGCTTTGATATAAACAGGGTACTGGAATTTGGG…	chr1H:522974230-522987281	Horvu_IGRI_1H01G587500	ATGGCCGCGCAGAGCTCCTCCCGCCTTCACCGCCTCCTCACATTGCTCGACACCGGTTCGACACAAGCCACAAGGTTCGCGGCCGCGCGCCAGATCGGAGAAATCGCAAAGACACATCCACAGGAGCTAAATGCTCTGTTGAAAAAGGTTTCTCAGTACCTTCGTAGTAAGAATTGGGACACAAGGGTTGCTGCAGCTCAGGCGATCGGTGCCATAGCAGAGAATGTCAAGCACACGACAGTCAAGGACTTGTTTGCAGCCATGGAAGCAGAAAAACATGCTTCCGGGTTATCTGATGAAACTGGTGATGTTGGGTCAGCATTGCCACTTCCTGATACTACTGCAACATCTGAGCTTGCTTTTGGAAGCTTTGATATAAACAGGGTACTGGAATTTGGG…	chr1H:518300096-518313152	Horvu_OUN333_1H01G587600	ATGGCCGCGCAGAGCTCCTCCCGCCTTCACCGCCTCCTCACATTGCTCGACACCGGTTCGACACAAGCCACAAGGTTCGCGGCCGCGCGCCAGATCGGAGAAATCGCAAAGACACATCCACAGGAGCTAAATGCTCTGTTGAAAAAGGTTTCTCAGTACCTTCGTAGTAAGAATTGGGACACAAGGGTTGCTGCAGCTCAGGCGATCGGTGCCATAGCAGAGAATGTCAAGCACACGACAGTCAAGGACTTGTTTGCAGCCGTGGAAGCAGAAAAACATGCTTCCGGGTTATCTGATGAAACTGGTGATGTTGGGTCAGCATTGCCACTTCCTGATACTACTGCAACATCTGAGCTTGCTTTTGGAAGCTTTGATATAAACAGGGTACTGGAATTTGGG…	chr1H:541335774-541348749
	ERCC6_1	HORVU.MOREX.r3.3HG0231890	ATGGGGGAGGAGGACGACGACCAGCGCCTGCTGCACAGCCTCGGCGTCACCTCCGCCAACATCGACGACATCGAGAGGAAGATCCTGTCGCAGGCGAAAACCGACCCGAAGAAGCATGACGCCGAGACGTCGGGGCCGGCCGCCGTCGGTGACCAGGAGAGTAGCCTGACAACGCCTCAAGACGATGCTCAGGCCAAGCTGCACCAGAAACTGCGGTCTGTGCAGCTTGAGATCGACGCCGTGGCTTCAACCCTTGGAGGGGCTAAACAAGCCGCTGGAAAGAAAGGCGGTGGGGGAAGCTCGGGTAGCGCTGATGCCGAGGATAAGAAGAAGAAGAAGAAGGAGAAGGTGAAGGAGGAGGAGAATGCTGATGAAGACGCCCCTCGTGGAGGAGCCCTC…	chr3:27704026-27709416	Horvu_AKASHIN_3H01G085700	ATGGGGGAGGAGGACGACGACCAGCGCCTGCTGCACAGCCTCGGCGTCACCTCCGCCAACATCGACGACATCGAGAGGAAGATCCTGTCGCAGGCGAAAACCGACCCGAAGAAGCATGACGCCGAGACGTCGGGGCCGGCCGCCGTCGGTGACCAGGAGAGTAGCCTGACAACGCCTCAAGACGATGCTCAGGCCAAGCTGCACCAGAAACTGCGGTCTGTGCAGCTTGAGATCGACGCCGTGGCTTCAACCCTTGGAGGGGCTAAACAAGCCGCTGGAAAGAAAGGCGGTGGGGGAAGCTCGGGTAGCGCTGATGCCGAGGATAAGAAGAAGAAGAAGAAGGAGAAGGTGAAGGAGGAGGAGAATGCTGATGAAGACGCCCCTCGTGGAGGAGCCCTC…	chr3H:30350256-30354915	Horvu_BARKE_3H01G090600	ATGGGGGAGGAGGACGACGACCAGCGCCTGCTGCACAGCCTCGGCGTCACCTCCGCCAACGTCGACGACATCGAGAGGAAGATCCTGTCGCAGGCGAAAACCGACCCGAAGAAGCATGACGCCGAGACGTCGGGGCCGGCCGCCGTCGGTGACCAGGAGAGTAGCCTGACAACGCCTCAAGACGATGCTCAGGCCAAGCTGCACCAGAAACTGCGGTCTGTGCAGCTTGAGATCGACGCCGTGGCTTCAACCCTTGGAGGGGCTAAACAAGCCGCTGGAAAGAAAGGCGGTGGGGGCAGCTCGGGTAGCGCTGATGCCGAGGATAAGAAGAAGAAGAAGAAGGAGAAGGTGAAGGAGGAGGAGAATGCCGATGAAGACGCCCCTCGTGGAGGAGCTCTC…	chr3H:28268228-28272622	Horvu_GOLDEN_3H01G077400	ATGGGGGAGGAGGACGACGACCAGCGCCTGCTGCACAGCCTCGGCGTCACCTCCGCCAACGTCGACGACATCGAGAGGAAGATCCTGTCGCAGGCGAAAACCGACCCGAAGAAGCATGACGCCGAGACGTCGGGGCCGGCCGCCGTCGGTGACCAGGAGAGTAGCCTGACAACGCCTCAAGACGATGCTCAGGCCAAGCTGCACCAGAAACTGCGGTCTGTGCAGCTTGAGATCGACGCCGTGGCTTCAACCCTTGGAGGGGCTAAACAAGCCGCTGGAAAGAAAGGCGGTGGGGGCAGCTCGGGTAGCGCTGATGCCGAGGATAAGAAGAAGAAGAAGAAGGAGAAGGTGAAGGAGGAGGAGAATGCCGATGAAGACGCCCCTCGTGGAGGAGCTCTC…	chr3H:22506567-22510961	Horvu_HOCKETT_3H01G080500	ATGGGGGAGGAGGACGACGACCAGCGCCTGCTGCACAGCCTCGGCGTCACCTCCGCCAACGTCGACGACATCGAGAGGAAGATCCTGTCGCAGGCGAAAACCGACCCGAAGAAGCATGACGCCGAGACGTCGGGGCCGGCCGCCGTCGGTGACCAGGAGAGTAGCCTGACAACGCCTCAAGACGATGCTCAGGCCAAGCTGCACCAGAAACTGCGGTCTGTGCAGCTTGAGATCGACGCCGTGGCTTCAACCCTTGGAGGGGCTAAACAAGCCGCTGGAAAGAAAGGCGGTGGGGGCAGCTCGGGTAGCGCTGATGCCGAGGATAAGAAGAAGAAGAAGAAGGAGAAGGTGAAGGAGGAGGAGAATGCCGATGAAGACGCCCCTCGTGGAGGAGCTCTC…	chr3H:23570368-23574762	Horvu_10350_3H01G085100	ATGGGGGAGGAGGACGACGACCAGCGCCTGCTGCACAGCCTCGGCGTCACCTCCGCCAACATCGACGACATCGAGAGGAAGATCCTGTCGCAGGCGAAAACCGACCCGAAGAAGCATGACGCCGAGACGTCGGGGCCGGCCGCCGTCGGTGACCAGGAGAGTAGCCTGACAACGCCTCAAGACGATGCTCAGGCCAAGCTGCACCAGAAACTGCGGTCTGTGCAGCTTGAGATAGACGCCGTGGCTTCCACCCTTGGAGGGGCTAAACAAGCCGCTGGAAAGAAAGGCGGTGGGGGCAGCTCGGGTAGCGCTGATGCCGAGGATAAGAAGAAGAAGAAGAAGGAGAAGGTGAAGGAGGAGGAGAATGCTGATGAAGACGCCCCTCGTGGAGGAGCCCTC…	chr3H:25101996-25106653	Horvu_13821_3H01G086200	ATGGGGGAGGAGGACGACGACCAGCGCCTGCTGCACAGCCTCGGCGTCACCTCCGCCAACGTCGACGACATCGAGAGGAAGATCCTGTCGCAGGCGAAAACCGACCCGAAGAAGCATGACGCCGAGACGTCGGGGCCGGCCGCCGTCGGTGACCAGGAGAGTAGCCTGACAACGCCTCAAGACGATGCTCAGGCCAAGCTGCACCAGAAACTGCGGTCTGTGCAGCTTGAGATCGACGCCGTGGCTTCAACCCTTGGAGGGGCTAAACAAGCCGCTGGAAAGAAAGGCGGTGGGGGCAGCTCGGGTAGCGCTGATGCCGAGGATAAGAAGAAGAAGAAGAAGGAGAAGGTGAAGGAGGAGGAGAATGCCGATGAAGACGCCCCTCGTGGAGGAGCTCTC…	chr3H:30120809-30125203	Horvu_13942_3H01G086600	ATGGGGGAGGAGGACGACGACCAGCGCCTGCTGCACAGCCTCGGCGTCACCTCCGCCAACATCGACGACATCGAGAGGAAGATCCTGTCGCAGGCGAAAACCGACCCGAAGAAGCATGACGCCGAGGCGTCGGGGCCGGCCGCCGTCGGTGACCAGGAGAGTAGCTTGACAACGCCTCAAGATGATGCTCAGGCCAAGCTGCACCAGAAACTGCGGTCTGTGCAGCTTGAGATCGACGCCGTGGCTTCAACCCTTGGAGGGGCTAAACAAGCCGCTGGAAAGAAAGGCGGTGGGGGCAGCTCGGGTAGCGCTGATGCCGAGGATAAGAAGAAGAAGAAGAAGGAGAAGGTGAAGGAGGAGGAGAATGCTGATGAAGACGCCCCTCATGGAGGAGCCCTC…	chr3H:27740157-27744781	Horvu_21599_3H01G087700	ATGGGGGAGGAGGACGACGACCAGCGCCTGCTGCACAGCCTCGGCGTCACCTCCGCCAACATCGACGACATCGAGAGGAAGATCCTGTCGCAGGCGAAAACCGACCCGAAGAAGCATGACGCCGAGACGTCGGGGCCGGCCGCCGTCGGTGACCAGGAGAGTAGCCTGACAACGCCTCAAGACGATGCTCAGGCCAAGCTGCACCAGAAACTGCGGTCTGTGCAGCTTGAGATCGACGCCGTGGCTTCAACCCTTGGAGGGGCTAAACAAGCCGCTGGAAAGAAAGGCGGTGGGGGCAGCTCGGGTAGCGCTGATGCCGAGGATAAGAAGAAGAAGAAGAAGGAGAAGGTGAAGGAGGAGGAGAATGCCGATGAAGACGCCCCTCGTGGAGGAGCTCTC…	chr3H:30069424-30073818	Horvu_3081_3H01G082900	ATGGGGGAGGAGGACGACGACCAGCGCCTGCTGCACAGCCTCGGCGTCACCTCCGCCAACATCGACGACATCGAGAGGAAGATCCTGTCGCAGGCGAAAACCGACCCGAAGAAGCATGACGCCGAGGCGTCGGGGCCGGCCGCCGTCGGTGACCAGGAGAGTAGCTTGACAACGCCTCAAGATGATGCTCAGGCCAAGCTGCACCAGAAACTGCGGTCTGTGCAGCTTGAGATCGACGCCGTGGCTTCAACCCTTGGAGGGGCTAAACAAGCCGCTGGAAAGAAAGGCGGTGGGGGCAGCTCGGGTAGCGCTGATGCCGAGGATAAGAAGAAGAAGAAGAAGGAGAAGGTGAAGGAGGAGGAGAATGCTGATGAAGACGCCCCTCATGGAGGAGCCCTC…	chr3H:27314903-27319527	Horvu_HHOR_3H01G086100	ATGGGGGAGGAGGACGACGACCAGCGCCTGCTGCACAGCCTCGGCGTCACCTCCGCCAACATCGACGACATCGAGAGGAAGATCCTGTCGCAGGCGAAAACCGACCCGAAGAAGCATGACGCCGAGGCGTCGGGGCCGGCCGCCGTCGGTGACCAGGAGAGTAGCTTGACAACGCCTCAAGATGATGCTCAGGCCAAGCTGCACCAGAAACTGCGGTCTGTGCAGCTTGAGATCGACGCCGTGGCTTCAACCCTTGGAGGGGCTAAACAAGCCGCTGGAAAGAAAGGCGGTGGGGGCAGCTCGGGTAGCGCTGATGCCGAGGATAAGAAGAAGAAGAAGAAGGAGAAGGTGAAGGAGGAGGAGAATGCTGATGAAGACGCCCCTCATGGAGGAGCCCTC…	chr3H:29765571-29770195	Horvu_7552_3H01G087600	ATGGGGGAGGAGGACGACGACCAGCGCCTGCTGCACAGCCTCGGCGTCACCTCCGCCAACATCGACGACATCGAGAGGAAGATCCTGTCGCAGGCGAAAACCGACCCGAAGAAGCATGACGCCGAGACGTCGGGGCCGGCCGCCGTCGGTGACCAGGAGAGTAGCCTGACAACGCCTCAAGACGATGCTCAGGCCAAGCTGCACCAGAAACTGCGGTCTGTGCAGCTTGAGATCGACGCCGTGGCTTCAACCCTTGGAGGGGCTAAACAAGCCGCTGGAAAGAAAGGCGGTGGGGGAAGCTCGGGTAGCGCTGATGCCGAGGATAAGAAGAAGAAGAAGAAGGAGAAGGTGAAGGAGGAGGAGAATGCTGATGAAGACGCCCCTCGTGGAGGAGCCCTC…	chr3H:26318266-26322925	Horvu_8148_3H01G089100	ATGGGGGAGGAGGACGACGACCAGCGCCTGCTGCACAGCCTCGGCGTCACCTCCGCCAACGTCGACGACATCGAGAGGAAGATCCTGTCGCAGGCGAAAACCGACCCGAAGAAGCATGACGCCGAGACGTCGGGGCCGGCCGCCGTCGGTGACCAGGAGAGTAGCCTGACAACGCCTCAAGACGATGCTCAGGCCAAGCTGCACCAGAAACTGCGGTCTGTGCAGCTTGAGATCGACGCCGTGGCTTCAACCCTTGGAGGGGCTAAACAAGCCGCTGGAAAGAAAGGCGGTGGGGGCAGCTCGGGTAGCGCTGATGCCGAGGATAAGAAGAAGAAGAAGAAGGAGAAGGTGAAGGAGGAGGAGAATGCCGATGAAGACGCCCCTCGTGGAGGAGCTCTC…	chr3H:28125415-28129809	Horvu_9043_3H01G081400	ATGGGGGAGGAGGACGACGACCAGCGCCTGCTGCACAGCCTCGGCGTCACCTCCGCCAACATCGACGACATCGAGAGGAAGATCCTGTCGCAGGCGAAAACCGACCCGAAGAAGCATGACGCCGAGACGTCGGGGCCGGCCGCCGTCGGTGACCAGGAGAGTAGCCTGACAACGCCTCAAGACGATGCTCAGGCCAAGCTGCACCAGAAACTGCGGTCTGTGCAGCTTGAGATAGACGCCGTGGCTTCCACCCTTGGAGGGGCTAAACAAGCCGCTGGAAAGAAAGGCGGTGGGGGCAGCTCGGGTAGCGCTGATGCCGAGGATAAGAAGAAGAAGAAGAAGGAGAAGGTGAAGGAGGAGGAGAATGCTGATGAAGACGCCCCTCGTGGAGGAGCCCTC…	chr3H:26312262-26316919	Horvu_IGRI_3H01G082900	ATGGGGGAGGAGGACGACGACCAGCGCCTGCTGCACAGCCTCGGCGTCACCTCCGCCAACGTCGACGACATCGAGAGGAAGATCCTGTCGCAGGCGAAAACCGACCCGAAGAAGCATGACGCCGAGACGTCGGGGCCGGCCGCCGTCGGTGACCAGGAGAGTAGCCTGACAACGCCTCAAGACGATGCTCAGGCCAAGCTGCACCAGAAACTGCGGTCTGTGCAGCTTGAGATCGACGCCGTGGCTTCAACCCTTGGAGGGGCTAAACAAGCCGCTGGAAAGAAAGGCGGTGGGGGCAGCTCGGGTAGCGCTGATGCCGAGGATAAGAAGAAGAAGAAGAAGGAGAAGGTGAAGGAGGAGGAGAATGCCGATGAAGACGCCCCTCGTGGAGGAGCTCTC…	chr3H:27513277-27517671	Horvu_OUN333_3H01G087700	ATGGGGGAGGAGGACGACGACCAGCGCCTGCTGCACAGCCTCGGCGTCACCTCCGCCAACATCGACGACATCGAGAGGAAGATCCTGTCGCAGGCGAAAACCGACCCGAAGAAGCATGACGCCGAGACGTCGGGGCCGGCCGCCGTCGGTGACCAGGAGAGTAGCCTGACAACGCCTCAAGACGATGCTCAGGCCAAGCTGCACCAGAAACTGCGGTCTGTGCAGCTTGAGATCGACGCCGTGGCTTCAACCCTTGGAGGGGCTAAACAAGCCGCTGGAAAGAAAGGCGGTGGGGGAAGCTCGGGTAGCGCTGATGCCGAGGATAAGAAGAAGAAGAAGAAGGAGAAGGTGAAGGAGGAGGAGAATGCTGATGAAGACGCCCCTCGTGGAGGAGCCCTC…	chr3H:29572936-29577595
	ERCC6_2	HORVU.MOREX.r3.2HG0132190	ATGTCCCTCAACTGCCTCAAGGAAACGCTCCTTCCCTGCTCCTCCTCCGCGCTCAGCCAATCTCAACCTCGATCGCCCTCGCCTCCTCGCCCACCACGGAGGCCCCCCAAGAGCTCCCTCTCGCAGCAGCTCCTCCGCCTCGAGGCCTCCTACTCCCTGCCACCGCCGCCACCGTCCCCTCCCAAACCTTTGAGCCAGAAGACAGCCGAGGATGCGGCCGAACAACCGACCTCCTCGTCGGAGGAGGACATGCCCCCCCGCCTCCGGCGCCGTCCGGCCCCGCCACCAGCGGCTTCCTTTGAGCCCCGCGGGCCCTATGAGCCACTTGTCCTCTCGCTGCCCGGAGAGCACCCCGTCGTCCAGGTGCCCCCATCAATTAATTGCAGGCTACTTGCACAT…	chr2:146767990-146774670	Horvu_AKASHIN_2H01G241100	ATGTCCCTCAACTGCCTCAAGGAAACGCTCCTTCCCTGCTCCTCCTCCGCGCTCAGCCAATCTCAACCTCGATCGCCCTCGCCTCCTCGCCCACCACGGAGGCCCCCCAAGAGCTCCCTCTCGCAGCAGCTCCTCCGCCTCGAGGCCTCCTACTCCCTGCCACCGCCGCCACCGTCCCCTCCCAAACCTTTGAGCCAGAAGACAGCCGAGGATGCGGCCGAACAACCGACCTCCTCGTCGGAGGAGGACATGCCCCCCCGCCTCCGGCGCCGTCCGGCCCCGCCACCAGCGGCTTCCTTTGAGCCCCGCGGGCCCTATGAGCCACTTGTCCTCTCGCTGCCCGGAGAGCACCCCGTCGTCCAGGTGCCCCCATCAATTAATTGCAGGCTACTTGCACAT…	chr2H:153917392-153923921	Horvu_BARKE_2H01G251300	ATGTCCCTCAACTGCCTCAAGGAAACGCTCCTTCCCTGCTCCTCCTCCGCGCTCAGCCAATCTCAACCTCGATCGCCCTCGCCTCCTCGCCCACCACGGAGGCCCCCCAAGAGCTCCCTCTCGCAGCAGCTCCTCCGCCTCGAGGCCTCCTACTCCCTGCCACCGCCGCCACCGTCCCCTCCCAAACCTTTGAGCCAGAAGACAGCCGAGGATGCGGCCGAACAACCGACCTCCTCGTCGGAGGAGGACATGCCCCCCCGCCTCCGGCGCCGTCCGGCCCCGCCACCAGCGGCTTCCTTTGAGCCCCGCGGGCCCTATGAGCCACTTGTCCTCTCGCTGCCCGGAGAGCACCCCGTCGTCCAGGTGCCCCCATCAATTAATTGCAGGCTACTTGCACAT…	chr2H:143794800-143801329	Horvu_GOLDEN_2H01G215100	ATGTCCCTCAACTGCCTCAAGGAAACGCTCCTTCCCTGCTCCTCCTCCGCGCTCAGCCAATCTCAACCTCGATCGCCCTCGCCTCCTCGCCCACCACGGAGGCCCCCCAAGAGCTCCCTCTCGCAGCAGCTCCTCCGCCTCGAGGCCTCCTACTCCCTGCCACCGCCGCCACCGTCCCCTCCCAAACCTTTGAGCCAGAAGACAGCCGAGGATGCGGCCGAACAACCGACCTCCTCGTCGGAGGAGGACATGCCCCCCCGCCTCCGGCGCCGTCCGGCCCCGCCACCAGCGGCTTCCTTTGAGCCCCGCGGGCCCTATGAGCCACTTGTCCTCTCGCTGCCCGGAGAGCACCCCGTCGTCCAGGTGCCCCCATCAATTAATTGCAGGCTACTTGCACAT…	chr2H:128308652-128315181	Horvu_HOCKETT_2H01G225400	ATGTCCCTCAACTGCCTCAAGGAAACGCTCCTTCCCTGCTCCTCCTCCGCGCTCAGCCAATCTCAACCTCGATCGCCCTCGCCTCCTCGCCCACCACGGAGGCCCCCCAAGAGCTCCCTCTCGCAGCAGCTCCTCCGCCTCGAGGCCTCCTACTCCCTGCCACCGCCGCCACCGTCCCCTCCCAAACCTTTGAGCCAGAAGACAGCCGAGGATGCGGCCGAACAACCGACCTCCTCGTCGGAGGAGGACATGCCCCCCCGCCTCCGGCGCCGTCCGGCCCCGCCACCAGCGGCTTCCTTTGAGCCCCGCGGGCCCTATGAGCCACTTGTCCTCTCGCTGCCCGGAGAGCACCCCGTCGTCCAGGTGCCCCCATCAATTAATTGCAGGCTACTTGCACAT…	chr2H:136791565-136798094	Horvu_10350_2H01G247600	ATGTCCCTCAACTGCCTCAAGGAAACGCTCCTTCCCTGCTCCTCCTCCGCGCTCAGCCAATCTCAACCTCGATCGCCCTCGCCTCCTCGCCCACCACGGAGGCCCCCCAAGAGCTCCCTCTCGCAGCAGCTCCTCCGCCTCGAGGCCTCCTACTCCCTGCCACCGCCGCCACCGTCCCCTCCCAAACCTTTGAGCCAGAAGACAGCCGAGGATGCGGCCGAACAACCGACCTCCTCGTCGGAGGAGGACATGCCCCCCCGCCTCCGGCGCCGTCCGGCCCCGCCACCAGCGGCTTCCTTTGAGCCCCGCGGGCCCTATGAGCCACTTGTCCTCTCGCTGCCCGGAGAGCACCCCGTCGTCCAGGTGCCCCCATCAATTAATTGCAGGCTACTTGCACAT…	chr2H:143719615-143726144	Horvu_13821_2H01G243300	ATGTCCCTCAACTGCCTCAAGGAAACGCTCCTTCCCTGCTCCTCCTCCGCGCTCAGCCAATCTCAACCTCGATCGCCCTCGCCTCCTCGCCCACCACGGAGGCCCCCCAAGAGCTCCCTCTCGCAGCAGCTCCTCCGCCTCGAGGCCTCCTACTCCCTGCCACCGCCGCCACCGTCCCCTCCCAAACCTTTGAGCCAGAAGACAGCCGAGGATGCGGCCGAACAACCGACCTCCTCGTCGGAGGAGGACATGCCCCCCCGCCTCCGGCGCCGTCCGGCCCCGCCACCAGCGGCTTCCTTTGAGCCCCGCGGGCCCTATGAGCCACTTGTCCTCTCGCTGCCCGGAGAGCACCCCGTCGTCCAGGTGCCCCCATCAATTAATTGCAGGCTACTTGCACAT…	chr2H:152326125-152332654	Horvu_13942_2H01G241100	ATGTCCCTCAACTGCCTCAAGGAAACGCTCCTTCCCTGCTCCTCCTCCGCGCTCAGCCAATCTCAACCTCGATCGCCCTCGCCTCCTCGCCCACCACGGAGGCCCCCCAAGAGCTCCCTCTCGCAGCAGCTCCTCCGCCTCGAGGCCTCCTACTCCCTGCCACCGCCGCCACCGTCCCCTCCCAAACCTTTGAGCCAGAAGACAGCCGAGGATGCGGCCGAACAACCGACCTCCTCGTCGGAGGAGGACATGCCCCCCCGCCTCTGGCGCCGTCCGGCCCCGCCACCAGCGGCTTCCTTTGAGCCCCGCGGGCCCTATGAGCCACTTGTCCTCTCGCTGCCCGGAGAGCACCCCGTCGTCCAGGTGCCCCCATCAATTAATTGCAGGCTACTTGCACAT…	chr2H:146936342-146942871	Horvu_21599_2H01G239600	ATGTCCCTCAACTGCCTCAAGGAAACGCTCCTTCCCTGCTCCTCCTCCGCGCTCAGCCAATCTCAACCTCGATCGCCCTCGCCTCCTCGCCCACCACGGAGGCCCCCCAAGAGCTCCCTCTCGCAGCAGCTCCTCCGCCTCGAGGCCTCCTACTCCCTGCCACCGCCGCCACCGTCCCCTCCCAAACCTTTGAGCCAGAAGACAGCCGAGGATGCGGCCGAACAACCGACCTCCTCGTCGGAGGAGGACATGCCCCCCCGCCTCCGGCGCCGTCCGGCCCCGCCACCAGCGGCTTCCTTTGAGCCCCGCGGGCCCTATGAGCCACTTGTCCTCTCGCTGCCCGGAGAGCACCCCGTCGTCCAGGTGCCCCCATCAATTAATTGCAGGCTACTTGCACAT…	chr2H:150729382-150735911	Horvu_3081_2H01G243400	ATGTCCCTCAACTGCCTCAAGGAAACGCTCCTTCCCTGCTCCTCCTCCGCGCTCAGCCAATCTCAACCTCGATCGCCCTCGCCTCCTCGCCCACCACGGAGGCCCCCCAAGAGCTCCCTCTCGCAGCAGCTCCTCCGCCTCGAGGCCTCCTACTCCCTGCCACCGCCGCCACCGTCCCCTCCCAAACCTTTGAGCCAGAAGACAGCCGAGGATGCGGCCGAACAACCGACCTCCTCGTCGGAGGAGGACATGCCCCCCCGCCTCCGGCGCCGTCCGGCCCCGCCACCAGCGGCTTCCTTTGAGCCCCGCGGGCCCTATGAGCCACTTGTCCTCTCGCTGCCCGGAGAGCACCCCGTCGTCCAGGTGCCCCCATCAATTAATTGCAGGCTACTTGCACAT…	chr2H:146400746-146407275	Horvu_HHOR_2H01G238000	ATGTCCCTCAACTGCCTCAAGGAAACGCTCCTTCCCTGCTCCTCCTCCGCGCTCAGCCAATCTCAACCTCGATCGCCCTCGCCTCCTCGCCCACCACGGAGGCCCCCCAAGAGCTCCCTCTCGCAGCAGCTCCTCCGCCTCGAGGCCTCCTACTCCCTGCCACCGCCGCCACCGTCCCCTCCCAAACCTTTGAGCCAGAAGACAGCCGAGGATGCGGCCGAACAACCGACCTCCTCGTCGGAGGAGGACATGCCCCCCCGCCTCCGGCGCCGTCCGGCCCCGCCACCAGCGGCTTCCTTTGAGCCCCGCGGGCCCTATGAGCCACTTGTCCTCTCGCTGCCCGGAGAGCACCCCGTCGTCCAGGTGCCCCCATCAATTAATTGCAGGCTACTTGCACAT…	chr2H:157976249-157982778	Horvu_7552_2H01G242900	ATGTCCCTCAACTGCCTCAAGGAAACGCTCCTTCCCTGCTCCTCCTCCGCGCTCAGCCAATCTCAACCTCGATCGCCCTCGCCTCCTCGCCCACCACGGAGGCCCCCCAAGAGCTCCCTCTCGCAGCAGCTCCTCCGCCTCGAGGCCTCCTACTCCCTGCCACCGCCGCCACCGTCCCCTCCCAAACCTTTGAGCCAGAAGACAGCCGAGGATGCGGCCGAACAACCGACCTCCTCGTCGGAGGAGGACATGCCCCCCCGCCTCCGGCGCCGTCCGGCCCCGCCACCAGCGGCTTCCTTTGAGCCCCGCGGGCCCTATGAGCCACTTGTCCTCTCGCTGCCCGGAGAGCACCCCGTCGTCCAGGTGCCCCCATCAATTAATTGCAGGCTACTTGCACAT…	chr2H:144903255-144909784	Horvu_8148_2H01G245300	ATGTCCCTCAACTGCCTCAAGGAAACGCTCCTTCCCTGCTCCTCCTCCGCGCTCAGCCAATCTCAACCTCGATCGCCCTCGCCTCCTCGCCCACCACGGAGGCCCCCCAAGAGCTCCCTCTCGCAGCAGCTCCTCCGCCTCGAGGCCTCCTACTCCCTGCCACCGCCGCCACCGTCCCCTCCCAAACCTTTGAGCCAGAAGACAGCCGAGGATGCGGCCGAACAACCGACCTCCTCGTCGGAGGAGGACATGCCCCCCCGCCTCCGGCGCCGTCCGGCCCCGCCACCAGCGGCTTCCTTTGAGCCCCGCGGGCCCTATGAGCCACTTGTCCTCTCGCTGCCCGGAGAGCACCCCGTCGTCCAGGTGCCCCCATCAATTAATTGCAGGCTACTTGCACAT…	chr2H:147716524-147723053	Horvu_9043_2H01G244900	ATGTCCCTCAACTGCCTCAAGGAAACGCTCCTTCCCTGCTCCTCCTCCGCGCTCAGCCAATCTCAACCTCGATCGCCCTCGCCTCCTCGCCCACCACGGAGGCCCCCCAAGAGCTCCCTCTCGCAGCAGCTCCTCCGCCTCGAGGCCTCCTACTCCCTGCCACCGCCGCCACCGTCCCCTCCCAAACCTTTGAGCCAGAAGACAGCCGAGGATGCGGCCGAACAACCGACCTCCTCGTCGGAGGAGGACATGCCCCCCCGCCTCCGGCGCCGTCCGGCCCCGCCACCAGCGGCTTCCTTTGAGCCCCGCGGGCCCTATGAGCCACTTGTCCTCTCGCTGCCCGGAGAGCACCCCGTCGTCCAGGTGCCCCCATCAATTAATTGCAGGCTACTTGCACAT…	chr2H:150441651-150448180	Horvu_IGRI_2H01G243300	ATGTCCCTCAACTGCCTCAAGGAAACGCTCCTTCCCTGCTCCTCCTCCGCGCTCAGCCAATCTCAACCTCGATCGCCCTCGCCTCCTCGCCCACCACGGAGGCCCCCCAAGAGCTCCCTCTCGCAGCAGCTCCTCCGCCTCGAGGCCTCCTACTCCCTGCCACCGCCGCCACCGTCCCCTCCCAAACCTTTGAGCCAGAAGACAGCCGAGGATGCGGCCGAACAACCGACCTCCTCGTCGGAGGAGGACATGCCCCCCCGCCTCCGGCGCCGTCCGGCCCCGCCACCAGCGGCTTCCTTTGAGCCCCGCGGGCCCTATGAGCCACTTGTCCTCTCGCTGCCCGGAGAGCACCCCGTCGTCCAGGTGCCCCCATCAATTAATTGCAGGCTACTTGCACAT…	chr2H:145880123-145886652	Horvu_OUN333_2H01G238200	ATGTCCCTCAACTGCCTCAAGGAAACGCTCCTTCCCTGCTCCTCCTCCGCGCTCAGCCAATCTCAACCTCGATCGCCCTCGCCTCCTCGCCCACCACGGAGGCCCCCCAAGAGCTCCCTCTCGCAGCAGCTCCTCCGCCTCGAGGCCTCCTACTCCCTGCCACCGCCGCCACCGTCCCCTCCCAAACCTTTGAGCCAGAAGACAGCCGAGGATGCGGCCGAACAACCGACCTCCTCGTCGGAGGAGGACATGCCCCCCCGCCTCCGGCGCCGTCCGGCCCCGCCACCAGCGGCTTCCTTTGAGCCCCGCGGGCCCTATGAGCCACTTGTCCTCTCGCTGCCCGGAGAGCACCCCGTCGTCCAGGTGCCCCCATCAATTAATTGCAGGCTACTTGCACAT…	chr2H:155004135-155010664
	ERCC6_3	HORVU.MOREX.r3.2HG0217790	ATGGCGTCCCCACCGTCCTTCGACTTCTTCTCCGACGCGCTCGACGACGATGCCTCCGCCCAAAACCCTAACCCCCACCCCACGCCGGCGCCGCCGCCCCCGCCCACCCCCAACGGCCTCAACGACCGCCTGCTCCGCTTCACCCAGAGCCGACCCCGCCCCCCACAAAACCCTAACCCCCCGCCGCCAGCCCACGCCCACCAGCCCCTGCCCCAGGACCGCAAGGTCAAGCTCGCCGGCCGCCGACGCCTCTGCAAGCTATCATCCTCCCCCGACCACGACCACGACAAGGACGAGGACAGCATCCGCGACATCCTCGACGACCTCGCCACCCGCCTAGACTCCCTCTCCGTCGACAGGCCCAAAGCCCGCCCCAGGCCCGCCCAGGCCAGGGCCCCG…	chr2:664579062-664586088	Horvu_AKASHIN_2H01G762900	ATGGAGCCCACCGGGTGCGGCAAAATGGTCAAGCCGTACAAGCTCCCGGGGAGCATTTTCGAGATGCTTTACCCCCACCAGCGCGAGGGGCTCAAGTGGCTCTGGGTTCTGCATTGCAGGGGAACTGGAGGGATCCTTGGGGATGACATGGGTCTCGGCAAGACCATGCAGGTTTCCTCCTTCCTGGCTGGATTGTTCCATTGCCGCTTAATCAAGAGAGTGTTAGTGGTCGCGCCAAAGACGCTTCTCGCTCATTGGACAAAGGAACTTTCAGTTGTCGGCCTCAAACATAAGATTAGGGATTACTCTGGTCCCAGTGTAAATGTTCGCAACTCTGAGCTTCAATATGCATTCAAGGAGGGCGGTATCCTACTGACTACATATGACATTGTCCGTAAC…	chr2H:695856266-695861949	Horvu_BARKE_2H01G779600	ATGGAGCCCACCGGGTGCGGCAAAATGGTCAAGCCGTACAAGCTCCCGGGGAGCATTTTCGAGATGCTTTACCCCCACCAGCGCGAGGGGCTCAAGTGGCTCTGGGTTCTGCATTGCAGGGGAACTGGAGGGATCCTTGGGGATGACATGGGTCTCGGCAAGACCATGCAGGTTTCCTCCTTCCTGGCTGGATTGTTCCATTGCCGCTTAATCAAGAGAGTGTTAGTGGTCGCGCCAAAGACGCTTCTCGCTCATTGGACAAAGGAACTTTCAGTTGTCGGCCTCAAACATAAGATTAGGGATTACTCTGGTCCCAGTGTAAATGTTCGCAACTCTGAGCTTCAATATGCATTCAAGGAGGGCGGTATCCTACTGACTACATATGACATTGTCCGTAAC…	chr2H:651240289-651245960	Horvu_GOLDEN_2H01G702100	ATGGAGCCCACCGGGTGCGGCAAAATGGTCAAGCCGTACAAGCTCCCGGGGAGCATTTTCGAGATGCTTTACCCCCACCAGCGCGAGGGGCTCAAGTGGCTCTGGGTTCTGCATTGCAGGGGAACTGGAGGGATCCTTGGGGATGACATGGGTCTCGGCAAGACCATGCAGGTTTCCTCCTTCCTGGCTGGATTGTTCCATTGCCGCTTAATCAAGAGAGTGTTAGTGGTCGCGCCAAAGACGCTTCTCGCTCATTGGACAAAGGAACTTTCAGTTGTCGGCCTCAAACATAAGATTAGGGATTACTCTGGTCCCAGTGTAAATGTTCGCAACTCTGAGCTTCAATATGCATTCAAGGAGGGCGGTATCCTACTGACTACATATGACATTGTCCGTAAC…	chr2H:611317853-611323533	Horvu_HOCKETT_2H01G733800	ATGGCGTCCCCACCGTCCTTCGACTTCTTCTCCGACGCGCTCGACGACGACGCCGACGCCCAAAACCCTAACCCCCACCCCACGCCGGCGCCCCCGCCCCCGCCCACCCCCAACGGCCTCAACGACCGCCTGCTCCGCTTCACCCAGAGCCGACCCCGCCCCCCACAAAACCCTAACCCCCCGCCGCCAGCCCACGCCCACCAGCCCCTGCCCCAGGACCGCAAGGTCAAGCTCGCCGGCCGCCGACGCCTCTGCAAGCTATCATCCTCCCCCGACCACGACCACGACAAGGACGAGGACAGCATCCGCGACATCCTCGACGACCTCGCCACCCGCCTAGACTCCCTCTCCGTCGACAGGCCCAAAGCCCGCCCCAGGCCCGCCCAGGCCAGGGCCCCG…	chr2H:639994443-640001338	Horvu_10350_2H01G776400	ATGGAGCCCACCGGGTGCGGCAAAATGGTCAAGCCGTACAAGCTCCCGGGGAGCATTTTCGAGATGCTTTACCCCCACCAGCGCGAGGGGCTCAAGTGGCTCTGGGTTCTGCATTGCAGGGGAACTGGAGGGATCCTTGGGGATGACATGGGTCTCGGCAAGACCATGCAGGTTTCCTCCTTCCTGGCTGGATTGTTCCATTGCCGCTTAATCAAGAGAGTGTTAGTGGTCGCGCCAAAGACGCTTCTCGCTCATTGGACAAAGGAACTTTCAGTTGTCGGCCTCAAACATAAGATTAGGGATTACTCTGGTCCCAGTGTAAATGTTCGCAACTCTGAGCTTCAATATGCATTCAAGGAGGGCGGTATCCTACTGACTACATATGACATTGTCCGTAAC…	chr2H:652514014-652519696	Horvu_13821_2H01G756400	ATGGAGCCCACCGGGTGCGGCAAAATGGTCAAGCCGTACAAGCTCCCGGGGAGCATTTTCGAGATGCTTTACCCCCACCAGCGCGAGGGGCTCAAGTGGCTCTGGGTTCTGCATTGCAGGGGAACTGGAGGGATCCTTGGGGATGACATGGGTCTCGGCAAGACCATGCAGGTTTCCTCCTTCCTGGCTGGATTGTTCCATTGCCGCTTAATCAAGAGAGTGTTAGTGGTCGCGCCAAAGACGCTTCTCGCTCATTGGACAAAGGAACTTTCAGTTGTCGGCCTCAAACATAAGATTAGGGATTACTCTGGTCCCAGTGTAAATGTTCGCAACTCTGAGCTTCAATATGCATTCAAGGAGGGCGGTATCCTACTGACTACATATGACATTGTCCGTAAC…	chr2H:683621287-683626967	Horvu_13942_2H01G751800	ATGGAGCCCACCGGGTGCGGCAAAATGGTCAAGCCGTACAAGCTCCCGGGGAGCATTTTCGAGATGCTTTACCCCCACCAGCGCGAGGGGCTCAAGTGGCTCTGGGTTCTGCATTGCAGGGGAACTGGAGGGATCCTTGGGGATGACATGGGTCTCGGCAAGACCATGCAGGTTTCCTCCTTCCTGGCTGGATTGTTCCATTGCCGCTTAATCAAGAGAGTGTTAGTGGTCGCGCCAAAGACGCTTCTCGCTCATTGGACAAAGGAACTTTCAGTTGTCGGCCTCAAACATAAGATTAGGGATTACTCTGGTCCCAGTGTAAATGTTCGCAACTCTGAGCTTCAATATGCATTCAAGGAGGGCGGTATCCTACTGACTACATATGACATTGTCCGTAAC…	chr2H:667008331-667014011	Horvu_21599_2H01G762200	ATGGAGCCCACCGGGTGCGGCAAAATGGTCAAGCCGTACAAGCTCCCGGGGAGCATTTTCGAGATGCTTTACCCCCACCAGCGCGAGGGGCTCAAGTGGCTCTGGGTTCTGCATTGCAGGGGAACTGGAGGGATCCTTGGGGATGACATGGGTCTCGGCAAGACCATGCAGGTTTCCTCCTTCCTGGCTGGATTGTTCCATTGCCGCTTAATCAAGAGAGTGTTAGTGGTCGCGCCAAAGACGCTTCTCGCTCATTGGACAAAGGAACTTTCAGTTGTCGGCCTCAAACATAAGATTAGGGATTACTCTGGTCCCAGTGTAAATGTTCGCAACTCTGAGCTTCAATATGCATTCAAGGAGGGCGGTATCCTACTGACTACATATGACATTGTCCGTAAC…	chr2H:684754145-684759831	Horvu_3081_2H01G771300	ATGGAGCCCACCGGGTGCGGCAAAATGGTCAAGCCGTACAAGCTCCCGGGGAGCATTTTCGAGATGCTTTATCCCCACCAGCGCGAGGGGCTCAAGTGGCTCTGGGTTCTGCATTGCAGGGGAACTGGAGGGATCCTTGGGGATGACATGGGTCTCGGCAAGACCATGCAGGTTTCCTCCTTCCTGGCTGGATTGTTCCATTGCCGCTTAATCAAGAGAGTGTTAGTGGTCGCGCCAAAGACGCTTCTCGCTCATTGGACAAAGGAACTTTCAGTTGTCGGCCTCAAACATAAGATTAGGGATTACTCTGGTCCCAGTGTAAATGTTCGCAACTCTGAGCTTCAATATGCATTCAAGGAGGGCGGTATCCTACTGACTACATATGACATTGTCCGTAAC…	chr2H:666826622-666832308	Horvu_HHOR_2H01G760200	ATGGCGTCCCCACCGTCCTTCGACTTCTTCTCCGACGCGCTCGACGACGACGCCGACGCCCAAAACCCTAACCCCCACCCCACGCCGGCGCACCCGCCCCCGCCCCCGCCCACCCCCAACGGCCTCAACGACCGCCTGCTCCGCTTCACCCAGAGCCGACCCCGCCCCCCACAAAACCCTAACCCCCCGCCGCCAGCCCACGCCCACGAGCCCCTGCCCCAGGACCGCAAGGTCAAGCTCGCCGGCCGCCGACGCCTCTGCAAGCTATCATCCTCCCCCGACCACGACCACGACAAGGACGAGGACAGCATCCGCGACATCCTCGACGACCTCGCCACCCGCCTCGACTCCCTCTCCGTCGACAGGCCCAAAGCCCGCCCCAGGCCCGCCCAGGCCAGG…	chr2H:716316472-716323181	Horvu_7552_2H01G761100	ATGGAGCCCACCGGGTGCGGCAAAATGGTCAAGCCGTACAAGCTCCCGGGGAGCATTTTCGAGATGCTTTACCCCCACCAGCGCGAGGGGCTCAAGTGGCTCTGGGTTCTGCATTGCAGGGGAACTGGAGGGATCCTTGGGGATGACATGGGTCTCGGCAAGACCATGCAGGTTTCCTCCTTCCTGGCTGGATTGTTCCATTGCCGCTTAATCAAGAGAGTGTTAGTGGTCGCGCCAAAGACGCTTCTCGCTCATTGGACAAAGGAACTTTCAGTTGTCGGCCTCAAACATAAGATTAGGGATTACTCTGGTCCCAGTGTAAATGTTCGCAACTCTGAGCTTCAATATGCATTCAAGGAGGGCGGTATCCTACTGACTACATATGACATTGTCCGTAAC…	chr2H:670705358-670711038	Horvu_8148_2H01G763200	ATGGAGCCCACCGGGTGCGGCAAAATGGTCAAGCCGTACAAGCTCCCGGGGAGCATTTTCGAGATGCTTTACCCCCACCAGCGCGAGGGGCTCAAGTGGCTCTGGGTTCTGCATTGCAGGGGAACTGGAGGGATCCTTGGGGATGACATGGGTCTCGGCAAGACCATGCAGGTTTCCTCCTTCCTGGCTGGATTGTTCCATTGCCGCTTAATCAAGAGAGTGTTAGTGGTCGCGCCAAAGACGCTTCTCGCTCATTGGACAAAGGAACTTTCAGTTGTCGGCCTCAAACATAAGATTAGGGATTACTCTGGTCCCAGTGTAAATGTTCGCAACTCTGAGCTTCAATATGCATTCAAGGAGGGCGGTATCCTACTGACTACATATGACATTGTCCGTAAC…	chr2H:669042944-669048624	Horvu_9043_2H01G762200	ATGGAGCCCACCGGGTGCGGCAAAATGGTCAAGCCGTACAAGCTCCCGGGGAGCATTTTCGAGATGCTTTACCCCCACCAGCGCGAGGGGCTCAAGTGGCTCTGGGTTCTGCATTGCAGGGGAACTGGAGGGATCCTTGGGGATGACATGGGTCTCGGCAAGACCATGCAGGTTTCCTCCTTCCTGGCTGGATTGTTCCATTGCCGCTTAATCAAGAGAGTGTTAGTGGTCGCGCCAAAGACGCTTCTCGCTCATTGGACAAAGGAACTTTCAGTTGTCGGCCTCAAACATAAGATTAGGGATTACTCTGGTCCCAGTGTAAATGTTCGCAACTCTGAGCTTCAATATGCATTCAAGGAGGGCGGTATCCTACTGACTACATATGACATTGTCCGTAAC…	chr2H:682480432-682486103	Horvu_IGRI_2H01G760800	ATGGAGCCCACCGGGTGCGGCAAAATGGTCAAGCCGTACAAGCTCCCGGGGAGCATTTTCGAGATGCTTTACCCCCACCAGCGCGAGGGGCTCAAGTGGCTCTGGGTTCTGCATTGCAGGGGAACTGGAGGGATCCTTGGGGATGACATGGGTCTCGGCAAGACCATGCAGGTTTCCTCCTTCCTGGCTGGATTGTTCCATTGCCGCTTAATCAAGAGAGTGTTAGTGGTCGCGCCAAAGACGCTTCTCGCTCATTGGACAAAGGAACTTTCAGTTGTCGGCCTCAAACATAAGATTAGGGATTACTCTGGTCCCAGTGTAAATGTTCGCAACTCTGAGCTTCAATATGCATTCAAGGAGGGCGGTATCCTACTGACTACATATGACATTGTCCGTAAC…	chr2H:663931084-663936764	Horvu_OUN333_2H01G761800	ATGGAGCCCACCGGGTGCGGCAAAATGGTCAAGCCGTACAAGCTCCCGGGGAGCATTTTCGAGATGCTTTACCCCCACCAGCGCGAGGGGCTCAAGTGGCTCTGGGTTCTGCATTGCAGGGGAACTGGAGGGATCCTTGGGGATGACATGGGTCTCGGCAAGACCATGCAGGTTTCCTCCTTCCTGGCTGGATTGTTCCATTGCCGCTTAATCAAGAGAGTGTTAGTGGTCGCGCCAAAGACGCTTCTCGCTCATTGGACAAAGGAACTTTCAGTTGTCGGCCTCAAACATAAGATTAGGGATTACTCTGGTCCCAGTGTAAATGTTCGCAACTCTGAGCTTCAATATGCATTCAAGGAGGGCGGTATCCTACTGACTACATATGACATTGTCCGTAAC…	chr2H:696837544-696843224
	ERCC6_4	HORVU.MOREX.r3.6HG0559010	ATGGAGGCCGCCGCCGCCGCTGCGTACAGGCTCCCAACGAGGGTATACAAGATGTTGTACATCCACCAGCGCGAGGGACTCCGCTGGCTCTGGTCGCTGCACTGCATGGGAACCGGCGGGATCCTAGGGGACGACATGGGACTAGGCAAGACCATGCAGGTTTCTGCCTTCTTGGCAGGGTTGTTCCATTCCGGTTTGATCAGGAGGGCGCTAGTCGTCGGCCCTAGGACACTTCTCACTCATTGGATCAAGGAGCTTTCGATTGTCGGCCTCAGCCATATGATCTGCAACTACTATGGTTCCAACAAAAATATTCGTGACAATGAGCTTCAACATGCCTTCAAGGAGGGAGGTATCCTATTGACAACATATGATATTGTCCGGATCAATTACAATCTA…	chr6:62400363-62407773	Horvu_AKASHIN_6H01G126700	GACGAGGAGGAGGAGCCCGGCGACATACTTCTGGACTGCATAGACGATGAAGAGGAGGCAGACCAGGAGGTGGAAAACCACCATGACATCGACGGTGACGAGGAGGAACCCGCCGACATACTTTTGGACTCCAACGATGATGAAGACGAGGCAGACCAGGAGGTGGAAAACCACCATGACACCGACGGCGACGAGGAGGAGGACTTTGAGATGGAGGCCGCCGCCGCCGCTGCGTACAGGCTCCCAACGAGGGTATACAAGATGTTGTACACCCACCAGCGCGAGGGACTCCGCTGGCTCTGGTCGCTGCACTGCATGGGAACCGGCGGGATCCTAGGGGACGACATGGGACTAGGCAAGACCATGCAGGTTTCTGCCTTCTTGGCAGGGTTGTTCCAT…	chr6H:62509557-62517852	Horvu_BARKE_6H01G139700	TTGTGGGCAATTTTCAATTTTTGTTGCCCGGAAGCCTTGGATGGTGAGGAAGAGTTCAGAACAAGGTTTCAACGCCCTATCACTGAAGGAAATAACAAGAATGCTAGCAATCGAGCGAAGGACATAGGCTCAAATGCAGCGAAGAAATTAAGAGAACGGATAAAGCCCTATTTCTTGCGACGCATGAAGAGTGAAGTGTCCCTTGAAATTGGTTTGACAGATGACAAAAAGCTTCCGAAGAAGAATGAACTAATTATCTGGCTGAAATTAACAGATTGCCAGAGGCGACTATATAAAGCTTTTCTGAACCATGAGCTAGTTCCATTTGAACCGGTAGAAAATAGCTTGGCTGCTCTTACGGTACTGAAAAAAATATGTGACCACCCACTGATATTGACT…	chr6H:58183609-58189429	Horvu_GOLDEN_6H01G115400	TTGTGGGCAATTTTCAATTTTTGTTGCCCGGAAGCCTTGGATGGTGAGGAAGAGTTCAGAACAAGGTTTCAACGCCCTATCACTGAAGGAAATAACAAGAATGCTAGCAATCGAGCGAAGGACATAGGCTCAAATGCAGCGAAGAAATTAAGAGAACGGATAAAGCCCTATTTCTTGCGACGCATGAAGAGTGAAGTGTCCCTTGAAATTGGTTTGACAGATGACAAAAAGCTTCCGAAGAAGAATGAACTAATTATCTGGCTGAAATTAACAGATTGCCAGAGGCGACTATATAAAGCTTTTCTGAACCATGAGCTAGTTCCATTTGAACCGGTAGAAAATAGCTTGGCTGCTCTTACGGTACTGAAAAAAATATGTGACCACCCACTGATATTGACT…	chr6H:49073128-49078948	Horvu_HOCKETT_6H01G124300	TTGTGGGCAATTTTCAATTTTTGTTGCCCGGAAGCCTTGGATGGTGAGGAAGAGTTCAGAACAAGGTTTCAACGCCCTATCACTGAAGGAAATAACAAGAATGCTAGCAATCGAGCGAAGGACATAGGCTCAAATGCAGCGAAGAAATTAAGAGAACGGATAAAGCCCTATTTCTTGCGACGCATGAAGAGTGAAGTGTCCCTTGAAATTGGTTTGACAGATGACAAAAAGCTTCCGAAGAAGAATGAACTAATTATCTGGCTGAAATTAACAGATTGCCAGAGGCGACTATATAAAGCTTTTCTGAACCATGAGCTAGTTCCATTTGAACCGGTAGAAAATAGCTTGGCTGCTCTTACGGTACTGAAAAAAATATGTGACCACCCACTGATATTGACT…	chr6H:54227345-54233165	N/A	N/A	chr6H:59678335-59678545	Horvu_13821_6H01G133200	TTGTGGGCAATTTTCAATTTTTGTTGCCCGGAAGCCTTGGATGGTGAGGAAGAGTTCAGAACAAGGTTTCAACGCCCTATCACTGAAGGAAATAACAAGAATGCTAGCAATCGAGCGAAGGACATAGGCTCAAATGCAGCGAAGAAATTAAGAGAACGGATAAAGCCCTATTTCTTGCGACGCATGAAGAGTGAAGTGTCCCTTGAAATTGGTTTGACAGATGACAAAAAGCTTCCGAAGAAGAATGAACTAATTATCTGGCTGAAATTAACAGATTGCCAGAGGCGACTATATAAAGCTTTTCTGAACCATGAGCTAGTTCCATTTGAACCGGTAGAAAATAGCTTGGCTGCTCTTACGGTACTGAAAAAAATATGTGACCACCCACTGATATTGACT…	chr6H:63792454-63798275	Horvu_13942_6H01G130800	GACGAGGAGGAGGAGCCCGGCGACATACTTCTGGACTGCATAGACGATGAAGAGGAGGCAGACCAGGAGGTGGAAAACCACCATGACATCGACGGTGACGAGGAGGAACCCGCCGACATACTTTTGGACTCCAACGATGATGAAGACGAGGCAGACCAGGAGGTGGAAAACCACCATGACACCGACGGCGACGAGGAGGAGGACTTTGAGATGGAGGCCGCCGCCGCCGCTGCGTACAGGCTCCCAACGAGGGTATACAAGATGTTGTACACCCACCAGCGCGAGGGACTCCGCTGGCTCTGGTCGCTGCACTGCATGGGAACCGGCGGGATCCTAGGGGACGACATGGGACTAGGCAAGACCATGCAGGTTTCTGCCTTCTTGGCAGGGTTGTTCCAT…	chr6H:59810571-59818076	N/A	N/A	chr6H63150899-63150689	Horvu_3081_6H01G132800	TTGTGGGCAATTTTCAATTTTTGTTGCCCGGAAGCCTTGGATGGTGAGGAAGAGTTCAGAACAAGGTTTCAACGCCCTATCACTGAAGGAAATAACAAGAATGCTAGCAATCGAGCGAAGGACATAGGCTCAAATGCAGCGAAGAAATTAAGAGAACGGATAAAGCCCTATTTCTTGCGACGCATGAAGAGTGAAGTGTCCCTTGAAATTGGTTTGACAGATGACAAAAAGCTTCCGAAGAAGAATGAACTAATTATCTGGCTGAAATTAACAGATTGCCAGAGGCGACTATATAAAGCTTTTCTGAACCATGAGCTAGTTCCATTTGAACCGGTAGAAAATAGCTTGGCTGCTCTTACGGTACTGAAAAAAATATGTGACCACCCACTGATATTGACT…	chr6H:59911245-59917067	N/A	N/A	chr6H:64940475-64940265	N/A	N/A	chr6H:59541450-59541240	Horvu_8148_6H01G137000	TTGTGGGCAATTTTCAATTTTTGTTGCCCGGAAGCCTTGGATGGTGAGGAAGAGTTCAGAACAAGGTTTCAACGCCCTATCACTGAAGGAAATAACAAGAATGCTAGCAATCGAGCGAAGGACATAGGCTCAAATGCAGCGAAGAAATTAAGAGAACGGATAAAGCCCTATTTCTTGCGACGCATGAAGAGTGAAGTGTCCCTTGAAATTGGTTTGACAGATGACAAAAAGCTTCCGAAGAAGAATGAACTAATTATCTGGCTGAAATTAACAGATTGCCAGAGGCGACTATATAAAGCTTTTCTGAACCATGAGCTAGTTCCATTTGAACCGGTAGAAAATAGCTTGGCTGCTCTTACGGTACTGAAAAAAATATGTGACCACCCACTGATATTGACT…	chr6H:60997259-61003080	Horvu_9043_6H01G132900	TTGTGGGCAATTTTCAATTTTTGTTGCCCGGAAGCCTTGGATGGTGAGGAAGAGTTCAGAACAAGGTTTCAACGCCCTATCACTGAAGGAAATAACAAGAATGCTAGCAATCGAGCGAAGGACATAGGCTCAAATGCAGCGAAGAAATTAAGAGAACGGATAAAGCCCTATTTCTTGCGACGCATGAAGAGTGAAGTGTCCCTTGAAATTGGTTTGACAGATGACAAAAAGCTTCCGAAGAAGAATGAACTAATTATCTGGCTGAAATTAACAGATTGCCAGAGGCGACTATATAAAGCTTTTCTGAACCATGAGCTAGTTCCATTTGAACCGGTAGAAAATAGCTTGGCTGCTCTTACGGTACTGAAAAAAATATGTGACCACCCACTGATATTGACT…	chr6H:62841239-62847059	Horvu_IGRI_6H01G134000	TTGTGGGCAATTTTCAATTTTTGTTGCCCGGAAGCCTTGGATGGTGAGGAAGAGTTCAGAACAAGGTTTCAACGCCCTATCACTGAAGGAAATAACAAGAATGCTAGCAATCGAGCGAAGGACATAGGCTCAAATGCAGCGAAGAAATTAAGAGAACGGATAAAGCCCTATTTCTTGCGACGCATGAAGAGTGAAGTGTCCCTTGAAATTGGTTTGACAGATGACAAAAAGCTTCCGAAGAAGAATGAACTAATTATCTGGCTGAAATTAACAGATTGCCAGAGGCGACTATATAAAGCTTTTCTGAACCATGAGCTAGTTCCATTTGAACCGGTAGAAAATAGCTTGGCTGCTCTTACGGTACTGAAAAAAATATGTGACCACCCACTGATATTGACT…	chr6H:60408733-60414554	Horvu_OUN333_6H01G130800	TTGTGGGCAATTTTCAATTTTTGTTGCCCGGAAGCCTTGGATGGTGAGGAAGAGTTCAGAACAAGGTTTCAACGCCCTATCACTGAAGGAAATAACAAGAATGCTAGCAATCGAGCGAAGGACATAGGCTCAAATGCAGCGAAGAAATTAAGAGAACGGATAAAGCCCTATTTCTTGCGACGCATGAAGAGTGAAGTGTCCCTTGAAATTGGTTTGACAGATGACAAAAAGCTTCCGAAGAAGAATGAACTAATTATCTGGCTGAAATTAACAGATTGCCAGAGGCGACTATATAAAGCTTTTCTGAACCATGAGCTAGTTCCATTTGAACCGGTAGAAAATAGCTTGGCTGCTCTTACGGTACTGAAAAAAATATGTGACCACCCACTGATATTGACT…	chr6H:62486642-62492463
	ERCC6_5	N/A	N/A	chr1:428714183-428717988	Horvu_AKASHIN_1H01G386800	ATGTGGGCGCTGTTCTCTTTTTGTTGCCCGGAAGTCTTGGGTGATAAGAAAGAGTTCAGAACAGGGTATGAATTGCCTATCTATAAAGGAAATGACAAGACCGCTAGCAACCGAGCCAAGCACATAGGCTCAAATGTAGCAAAGGAACTAAGGGAACGGATAAAGCCATATTTTTTGCGACGTATGAAAAATGAAGTGTCCCTTGAGACTGGTTTGATTGATGATAAACAGCTTCCGAAGAAGAACGAGCTAATTATCTGGCTCAAATTAACAGATTGCCAGAGGCAACTATATAAAGCTTTTCTGAACTGTGAGCTAGTTCATTTAGCATCGCAAGGAAATCCCTTGGCTGCTCTCACGGTATTGAAGAAAATATGCGATCACCCACTGATATTGACG…	chr1H:447728960-447733160	Horvu_BARKE_1H01G402400	ATGAGAATGTGTGCAGCCAACAATCTCCCTTTCTCCGTCCCTTGTCTTACACATCTCCCCGACGACGACCTCCACGACCCTGCAGCTGCAGGTATCATCGATCGCCGTCCAACTACCTGTCAATCGAGTTCCGTCCATCCATCGGTACGGTGCCTAGTAGCTCGATCGCCTTCCGTTCCGTACGTGCACGCAGACCCTCGGCAGATGGGCATGAGGAAGGTGAGGCTGCCCGGCCGCCGGCGCCTGTGCAAGCTCGGCGACCTCTCTTCCGACGACGACGACCAGCCCGATGTTGCCAGCTGCGAGACGGAGGAGCCCACCGAAGTATTTTCCGACTTCAGAGATGACGATGACGAGAACCACCGCGACACCGACACGGACGAGTGGGAGGAGGCGGAG…	chr1H:426686050-426694464	Horvu_GOLDEN_1H01G344300	ATGAGAATGTGTGCAGCCAACAATCTCCCTTTCTCCGTCCCTTGTCTTACACATCTCCCCGACGACGACCTCCACGACCCTGCAGCTGCAGGTATCATCGATCGCCGTCCAACTACCTGTCAATCGAGTTCCGTCCATCCATCGGTACGGTGCCTAGTAGCTCGATCGCCTTCCGTTCCGTACGTGCACGCAGACCCTCGGCAGATGGGCATGAGGAAGGTGAGGCTGCCCGGCCGCCGGCGCCTGTGCAAGCTCGGCGACCTCTCTTCCGACGACGACGACCAGCCCGATGTTGCCAGCTGCGAGACGGAGGAGCCCACCGAAGTATTTTCCGACTTCAGAGATGACGATGACGAGAACCACCGCGACACCGACACGGACGAGTGGGAGGAGGCGGAG…	chr1H:397915792-397924235	Horvu_HOCKETT_1H01G372800	ATGAGAATGTGTGCAGCCAACAATCTCCCTTTCTCCGTCCCTTGTCTTACACATCTCCCCGACGACGACCTCCACGACCCTGCAGCTGCAGGTATCATCGATCGCCGTCCAACTACCTGTCAATCGAGTTCCGTCCATCCATCGGTACGGTGCCTAGTAGCTCGATCGCCTTCCGTTCCGTACGTGCACGCAGACCCTCGGCAGATGGGCATGAGGAAGGTGAGGCTGCCCGGCCGCCGGCGCCTGTGCAAGCTCGGCGACCTCTCTTCCGACGACGACGACCAGCCCGATGTTGCCAGCTGCGAGACGGAGGAGCCCACCGAAGTATTTTCCGACTTCAGAGATGACGATGACGAGAACCACCGCGACACCGACACGGACGAGTGGGAGGAGGCGGAG…	chr1H:412867766-412876180	Horvu_10350_1H01G394600	ATGAGAATGTGTGCAGCCAACAATCTCCCTTTCTCCGTCCCTTGTCTTACACATCTCCCCGACGACGACCTCCACGACCCTGCAGCTGCAGGTATCATCGATCGCCGTCCAACTACCTGTCAATCGAGTTCCGTCCATCCATCGGTACGGTGCCTAGTAGCTCGATCGCCTTCCGTTCCGTACGTGCACGCAGACCCTCGGCAGATGGGCATGAGGAAGGTGAGGCTGCCCGGCCGCCGGCGCCTGTGCAAGCTCGGCGACCTCTCTTCCGACGACGACGACCAGCCCGATGTTGCCAGCTGCGAGACGGAGGAGCCCACCGAAGTATTTTCCGACTTCAGAGATGACGATGACGAGAACCACCGCGACACCGACACGGACGAGTGGGAGGAGGCGGAG…	chr1H:425935937-425944351	N/A	N/A	chr1H:443184104-443187899	Horvu_13942_1H01G381500	ATGAGAATGTGTGCAGCCAACAATCTCCCTTTCTCCGTCCCTTGTCTTACACATCTCCCCGACGACGACCTCCACGACCCTGCAGCTGCAGGTATCATCGATCGCCGTCCAACTACCTGTCAATCGAGTTCCGTCCATCCATCGGTACGGTGCCTAGTAGCTCGATCGCCTTCCGTTCCGTACGTGCACGCAGACCCTCGGCAGATGGGCATGAGGAAGGTGAGGCTGCCCGGCCGCCGGCGCCTGTGCAAGCTCGGCGACCTCTCTTCCGACGACGACGACCAGCCCGATGTTGCCAGCTGCGAGACGGAGGAGCCCACCGAAGTATTTTCCGACTTCAGAGATGACGATGACGCGACGGACCAGGAGGAGGAGAACCACCGCGACACCGACACGGAC…	chr1H:432484841-432491275	N/A	N/A	chr1H:443429094-443432889	Horvu_3081_1H01G390500	ATGAGAATGTGTGCAGCCAACAATCTCCCTTTCTCCGTCCCTTGTCTTACACATCTCCCCGACGACGACCTCCACGACCCTGCAGCTGCAGGTATCATCGATCGCCGTCCAACTACCTGTCAATCGAGTTCCGTCCATCCATCGGTACGGTGCCTAGTAGCTCGATCGCCTTCCGTTCCGTACGTGCACGCAGACCCTCGGCAGATGGGCATGAGGAAGGTGAGGCTGCCCGGCCGCCGGCGCCTGTGCAAGCTCGGCGACCTCTCTTCCGACGACGACGACCAGCCCGATGTTGCCAGCTGCGAGACGGAGGAGCCCACCGAAGTATTTTCCGACTTCAGAGATGACGATGACGCGACGGACCAGGAGGAGGAGAACCACCGCGACACCGACACGGAC…	chr1H:431582574-431589008	N/A	N/A	chr1H:462266670-462268758	N/A	N/A	chr1H:433386424-433390097	Horvu_8148_1H01G387000	ATGAGAATGTGTGCAGCCAACAATCTCCCTTTCTCCGTCCCTTGTCTTACACATCTCCCCGACGACGACCTCCACGACCCTGCAGCTGCAGGTATCATCGATCGCCGTCCAACTACCTGTCAATCGAGTTCCGTCCATCCATCGGTACGGTGCCTAGTAGCTCGATCGCCTTCCGTTCCGTACGTGCACGCAGACCCTCGGCAGATGGGCATGAGGAAGGTGAGGCTGCCCGGCCGCCGGCGCCTGTGCAAGCTCGGCGACCTCTCTTCCGACGACGACGACCAGCCCGATGTTGCCAGCTGCGAGACGGAGGAGCCCACCGAAGTATTTTCCGACTTCAGAGATGACGATGACGAGAACCACCGCGACACCGACACGGACGAGTGGGAGGAGGCGGAG…	chr1H:436422452-436430866	Horvu_9043_1H01G386700	ATGAGAATGTGTGCAGCCAACAATCTCCCTTTCTCCGTCCCTTGTCTTACACATCTCCCCGACGACGACCTCCACGACCCTGCAGCTGCAGGTATCATCGATCGCCGTCCAACTACCTGTCAATCGAGTTCCGTCCATCCATCGGTACGGTGCCTAGTAGCTCGATCGCCTTCCGTTCCGTACGTGCACGCAGACCCTCGGCAGATGGGCATGAGGAAGGTGAGGCTGCCCGGCCGCCGGCGCCTGTGCAAGCTCGGCGACCTCTCTTCCGACGACGACGACCAGCCCGATGTTGCCAGCTGCGAGACGGAGGAGCCCACCGAAGTATTTTCCGACTTCAGAGATGACGATGACGAGAACCACCGCGACACCGACACGGACGAGTGGGAGGAGGCGGAG…	chr1H:435438962-435447376	Horvu_IGRI_1H01G385000	ATGAGAATGTGTGCAGCCAACAATCTCCCTTTCTCCGTCCCTTGTCTTACACATCTCCCCGACGACGACCTCCACGACCCTGCAGCTGCAGGTATCATCGATCGCCGTCCAACTACCTGTCAATCGAGTTCCGTCCATCCATCGGTACGGTGCCTAGTAGCTCGATCGCCTTCCGTTCCGTACGTGCACGCAGACCCTCGGCAGATGGGCATGAGGAAGGTGAGGCTGCCCGGCCGCCGGCGCCTGTGCAAGCTCGGCGACCTCTCTTCCGACGACGACGACCAGCCCGATGTTGCCAGCTGCGAGACGGAGGAGCCCACCGAAGTATTTTCCGACTTCAGAGATGACGATGACGCGACGGACCAGGAGGAGGAGAACCACCGCGACACCGACACGGAC…	chr1H:430180115-430186549	Horvu_OUN333_1H01G384600	ATGAGAATGTGTGCAGCCAACAATCTCCCTTTCTCCGTCCCTTGTCTTACACATCTCCCCGACGACGACCTCCACGACCCTGCAGCTGCAGGTATCATCGATCGCCGTCCAACTACCTGTCAATCGAGTTCCGTCCATCCATCGGTACGGTGCCTAGTAGCTCGATCGCCTTCCGTTCCGTACGTGCACGCAGACCCTCGGCAGATGGGCATGAGGAAGGTGAGGCTGCCCGGCCGCCGGCGCCTGTGCAAGCTCGGCGACCTCTCTTCCGACGACGACGACCAGCCCGATGTTGCCAGCTGCGAGACGGAGGAGCCCACCGAAGTATTTTCCGACTTCAGAGATGACGATGACGAGAACCACCGCGACACCGACACGGACGAGTGGGAGGAGGCGGAG…	chr1H:447316123-447324537
SMARCAL1-like	SMARCAL1_1	HORVU.MOREX.r3.2HG0128410	ATGGAGATCGCGGCGGAGCCCGTGAGGCTCACGGAGGAGCAGCGCCGCCGCATCGAGGCCAGCCGCCTCGCCGCCCTCGAGAGGCTCAAGCGCTCCGCCGCCGCCGCCGGCACCACCACCGAGTCGTTCAGGCTCGCCAAGTGCCCAAGAATCGCCCACCCCCTGCCCCCGCGTCCTTGCCCGCCGCCGCAGACGCTGCCGCCGCCTGCGCCTCCGACGGGGTTCCGGGCGGTGCTGGAGTTGTGCAGCCCCGACGAGTTCCAGGTCACAGTCGGCCGAGCGGAGGGCAAGGCTTTCCCCGGGGAGGCCGACTGCCTCCGCGCCGTCGAGGACTGCGTCGCTTCGGCTGTACCATTCTCTACAACACAAAGTCAAAGCGGGCATATTTCTTCTGTCTTT…	chr2:116565300-116594447	Horvu_AKASHIN_2H01G217300	ATGGAGATCGCGGCGGAGCCCGTGAGGCTCACGGAGGAGCAGCGCCGCCGCATCGAGGCCAGCCGCCTCGCCGCCCTCGAGAGGCTCAAGCGCTCCGCCGCCGCCGCCGGCACCACCACCGAGTCGTTCAGGCTCGCCAAGTGCCCAAGAATCGCCCACCCCCTGCCCCCGCGTCCTTGCCCGCCGCCGCAGACGCTGCCGCCGCCTGCGCCTCCGACGGGGTTCCGGGCGGTGCTGGAGTTGTGCAGCCCCGACGAGTTCCAGGTCACAGTCGGCCGAGCGGAGGGCAAGGCTTTCCCCGGGGAGGCCGACTGCCTCCGCGCCGTCGAGGACTGCGTCGCTTCGGCTGTACCATTCTCTACAACACAAAGTCAAAGCGGGCATATTTCTTCTGTCTTT…	chr2H:121682467-121712293	Horvu_BARKE_2H01G227300	ATGGAGATCGCGGCGGAGCCCGTGAGGCTCACGGAGGAGCAGCGCCGCCGCATCGAGGCCAGCCGCCTCGCCGCCCTCGAGAGGCTCAAGCGCTCCGCCGCCGCCGCCGGCACCACCACCGAGTCGTTCAGGCTCGCCAAGTGCCCAAGAATCGCCCACCCCCTGCCCCCGCGTCCTTGCCCGCCGCCGCAGACGCTGCCGCCGCCTGCGCCTCCGACGGGGTTCCGGGCGGTGCTGGAGTTGTGCAGCCCCGACGAGTTCCAGGTCACAGTCGGCCGAGCGGAGGGCAAGGCTTTCCCCGGGGAGGCCGACTGCCTCCGCGCCGTCGAGGACTGCGTCGCTTCGGCTGTACCATTCTCTACAACACAAAGTCAAAGCGGGCATATTTCTTCTGTCTTT…	chr2H:113605703-113634789	Horvu_GOLDEN_2H01G192600	ATGGAGATCGCGGCGGAGCCCGTGAGGCTCACGGAGGAGCAGCGCCGCCGCATCGAGGCCAGCCGCCTCGCCGCCCTCGAGAGGCTCAAGCGCTCCGCCGCCGCCGCCGGCACCACCACCGAGTCGTTCAGGCTCGCCAAGTGCCCAAGAATCGCCCACCCCCTGCCCCCGCGTCCTTGCCCGCCGCCGCAGACGCTGCCGCCGCCTGCGCCTCCGACGGGGTTCCGGGCGGTGCTGGAGTTGTGCAGCCCCGACGAGTTCCAGGTCACAGTCGGCCGAGCGGAGGGCAAGGCTTTCCCCGGGGAGGCCGACTGCCTCCGCGCCGTCGAGGACTGCGTCGCTTCGGCTGTACCATTCTCTACAACACAAAGTCAAAGCGGGCATATTTCTTCTGTCTTT…	chr2H:99125287-99154714	Horvu_HOCKETT_2H01G202200	ATGGAGATCGCGGCGGAGCCCGTGAGGCTCACGGAGGAGCAGCGCCGCCGCATCGAGGCCAGCCGCCTCGCCGCCCTCGAGAGGCTCAAGCGCTCCGCCGCCGCCGCCGGCACCACCACCGAGTCGTTCAGGCTCGCCAAGTGCCCAAGAATCGCCCACCCCCTGCCCCCGCGTCCTTGCCCGCCGCCGCAGACGCTGCCGCCGCCTGCGCCTCCGACGGGGTTCCGGGCGGTGCTGGAGTTGTGCAGCCCCGACGAGTTCCAGGTCACAGTCGGCCGAGCGGAGGGCAAGGCTTTCCCCGGGGAGGCCGACTGCCTCCGCGCCGTCGAGGACTGCGTCGCTTCGGCTGTACCATTCTCTACAACACAAAGTCAAAGCGGGCATATTTCTTCTGTCTTT…	chr2H:107158501-107188028	Horvu_10350_2H01G223800	ATGGAGATCGCGGCGGAGCCCGTGAGGCTCACGGAGGAGCAGCGCCGCCGCATCGAGGCCAGCCGCCTCGCCGCCCTCGAGAGGCTCAAGCGCTCCGCCGCCGCCGCCGGCACCACCACCGAGTCGTTCAGGCTCGCCAAGTGCCCAAGAATCGCCCACCCCCTGCCCCCGCGTCCTTGCCCGCCGCCGCAGACGCTGCCGCCGCCTGCGCCTCCGACGGGGTTCCGGGCGGTGCTGGAGTTGTGCAGCCCCGACGAGTTCCAGGTCACAGTCGGCCGAGCGGAGGGCAAGGCTTTCCCCGGGGAGGCCGACTGCCTCCGCGCCGTCGAGGACTGCGTCGCTTCGGCTGTACCATTCTCTACAACACAAAGTCAAAGCGGGCATATTTCTTCTGTCTTT…	chr2H:114080677-114109857	Horvu_13821_2H01G219900	ATGGAGATCGCGGCGGAGCCCGTGAGGCTCACGGAGGAGCAGCGCCGCCGCATCGAGGCCAGCCGCCTCGCCGCCCTCGAGAGGCTCAAGCGCTCCGCCGCCGCCGCCGGCACCACCACCGAGTCGTTCAGGCTCGCCAAGTGCCCAAGAATCGCCCACCCCCTGCCCCCGCGTCCTTGCCCGCCGCCGCAGACGCTGCCGCCGCCTGCGCCTCCGACGGGGTTCCGGGCGGTGCTGGAGTTGTGCAGCCCCGACGAGTTCCAGGTCACAGTCGGCCGAGCGGAGGGCAAGGCTTTCCCCGGGGAGGCCGACTGCCTCCGCGCCGTCGAGGACTGCGTCGCTTCGGCTGTACCATTCTCTACAACACAAAGTCAAAGCGGGCATATTTCTTCTGTCTTT…	chr2H:120727814-120761234	Horvu_13942_2H01G217900	ATGGAGATCGCGGCGGAGCCCGTGAGGCTCACGGAGGAGCAGCGCCGCCGCATCGAGGCCAGCCGCCTCGCCGCCCTCGAGAGGCTCAAGCGCTCCGCCGCCGCCGCCGGCACCACCACCGAGTCGTTCAGGCTCGCCAAGTGCCCAAGAATCGCCCACCCCCTGCCCCCGCGTCCTTGCCCGCCGCCGCAGACGCTGCCGCCGCCTGCGCCTCCGACGGGGTTCCGGGCGGTGCTGGAGTTGTGCAGCCCCGACGAGTTCCAGGTCACAGTCGGCCGAGCGGAGGGCAAGGCTTTCCCCGGGGAGGCCGACTGCCTCCGCGCCGTCGAGGACTGCGTCGCTTCGGCTGTACCATTCTCTACAACACAAAGTCAAAGCGGGCATATTTCTTCTGTCTTT…	chr2H:115782504-115811636	Horvu_21599_2H01G216800	ATGGAGATCGCGGCGGAGCCCGTGAGGCTCACGGAGGAGCAGCGCCGCCGCATCGAGGCCAGCCGCCTCGCCGCCCTCGAGAGGCTCAAGCGCTCCGCCGCCGCCGCCGGCACCACCACCGAGTCGTTCAGGCTCGCCAAGTGCCCAAGAATCGCCCACCCCCTGCCCCCGCGTCCTTGCCCGCCGCCGCAGACGCTGCCGCCGCCTGCGCCTCCGACGGGGTTCCGGGCGGTGCTGGAGTTGTGCAGCCCCGACGAGTTCCAGGTCACAGTCGGCCGAGCGGAGGGCAAGGCTTTCCCCGGGGAGGCCGACTGCCTCCGCGCCGTCGAGGACTGCGTCGCTTCGGCTGTACCATTCTCTACAACACAAAGTCAAAGCGGGCATATTTCTTCTGTCTTT…	chr2H:119641942-119672278	Horvu_3081_2H01G218900	ATGGAGATCGCGGCGGAGCCCGTGAGGCTCACGGAGGAGCAGCGCCGCCGCATCGAGGCCAGCCGCCTCGCCGCCCTCGAGAGGCTCAAGCGCTCCGCCGCCGCCGCCGGCACCACCACCGAGTCGTTCAGGCTCGCCAAGTGCCCAAGAATCGCCCACCCCCTGCCCCCGCGTCCTTGCCCGCCGCCGCAGACGCTGCCGCCGCCTGCGCCTCCGACGGGGTTCCGGGCGGTGCTGGAGTTGTGCAGCCCCGACGAGTTCCAGGTCACAGTCGGCCGAGCGGAGGGCAAGGCTTTCCCCGGGGAGGCCGACTGCCTCCGCGCCGTCGAGGACTGCGTCGCTTCGGCTGTACCATTCTCTACAACACAAAGTCAAAGCGGGCATATTTCTTCTGTCTTT…	chr2H:115550835-115580319	Horvu_HHOR_2H01G213900	ATGGAGATCGCGGCGGAGCCCGTGAGGCTCACGGAGGAGCAGCGCCGCCGCATCGAGGCCAGCCGCCTCGCCGCCCTCGAGAGGCTCAAGCGCTCCGCCGCCGCCGCCGGCACCACCACCGAGTCGTTCAGGCTCGCCAAGTGCCCAAGAATCGCCCACCCCCTGCCCCCGCGTCCTTGCCCGCCGCCGCAGACGCTGCCGCCGCCTGCGCCTCCGACGGGGTTCCGGGCGGTGCTGGAGTTGTGCAGCCCCGACGAGTTCCAGGTCACAGTCGGCCGAGCGGAGGGCAAGGCTTTCCCCGGGGAGGCCGACTGCCTCCGCGCCGTCGAGGACTGCGTCGCTTCGGCTGTACCATTCTCTACAACACAAAGTCAAAGCGGGCATATTTCTTCTGTCTTT…	chr2H:124508533-124538150	Horvu_7552_2H01G219000	ATGGAGATCGCGGCGGAGCCCGTGAGGCTCACGGAGGAGCAGCGCCGCCGCATCGAGGCCAGCCGCCTCGCCGCCCTCGAGAGGCTCAAGCGCTCCGCCGCCGCCGCCGGCACCACCACCGAGTCGTTCAGGCTCGCCAAGTGCCCAAGAATCGCCCACCCCCTGCCCCCGCGTCCTTGCCCGCCGCCGCAGACGCTGCCGCCGCCTGCGCCTCCGACGGGGTTCCGGGCGGTGCTGGAGTTGTGCAGCCCCGACGAGTTCCAGGTCACAGTCGGCCGAGCGGAGGGCAAGGCTTTCCCCGGGGAGGCCGACTGCCTCCGCGCCGTCGAGGACTGCGTCGCTTCGGCTGTACCATTCTCTACAACACAAAGTCAAAGCGGGCATATTTCTTCTGTCTTT…	chr2H:114035676-114064827	Horvu_8148_2H01G221200	ATGGAGATCGCGGCGGAGCCCGTGAGGCTCACGGAGGAGCAGCGCCGCCGCATCGAGGCCAGCCGCCTCGCCGCCCTCGAGAGGCTCAAGCGCTCCGCCGCCGCCGCCGGCACCACCACCGAGTCGTTCAGGCTCGCCAAGTGCCCAAGAATCGCCCACCCCCTGCCCCCGCGTCCTTGCCCGCCGCCGCAGACGCTGCCGCCGCCTGCGCCTCCGACGGGGTTCCGGGCGGTGCTGGAGTTGTGCAGCCCCGACGAGTTCCAGGTCACAGTCGGCCGAGCGGAGGGCAAGGCTTTCCCCGGGGAGGCCGACTGCCTCCGCGCCGTCGAGGACTGCGTCGCTTCGGCTGTACCATTCTCTACAACACAAAGTCAAAGCGGGCATATTTCTTCTGTCTTT…	chr2H:117174901-117204457	Horvu_9043_2H01G221200	ATGGAGATCGCGGCGGAGCCCGTGAGGCTCACGGAGGAGCAGCGCCGCCGCATCGAGGCCAGCCGCCTCGCCGCCCTCGAGAGGCTCAAGCGCTCCGCCGCCGCCGCCGGCACCACCACCGAGTCGTTCAGGCTCGCCAAGTGCCCAAGAATCGCCCACCCCCTGCCCCCGCGTCCTTGCCCGCCGCCGCAGACGCTGCCGCCGCCTGCGCCTCCGACGGGGTTCCGGGCGGTGCTGGAGTTGTGCAGCCCCGACGAGTTCCAGGTCACAGTCGGCCGAGCGGAGGGCAAGGCTTTCCCCGGGGAGGCCGACTGCCTCCGCGCCGTCGAGGACTGCGTCGCTTCGGCTGTACCATTCTCTACAACACAAAGTCAAAGCGGGCATATTTCTTCTGTCTTT…	chr2H:118843687-118877614	Horvu_IGRI_2H01G219400	ATGGAGATCGCGGCGGAGCCCGTGAGGCTCACGGAGGAGCAGCGCCGCCGCATCGAGGCCAGCCGCCTCGCCGCCCTCGAGAGGCTCAAGCGCTCCGCCGCCGCCGCCGGCACCACCACCGAGTCGTTCAGGCTCGCCAAGTGCCCAAGAATCGCCCACCCCCTGCCCCCGCGTCCTTGCCCGCCGCCGCAGACGCTGCCGCCGCCTGCGCCTCCGACGGGGTTCCGGGCGGTGCTGGAGTTGTGCAGCCCCGACGAGTTCCAGGTCACAGTCGGCCGAGCGGAGGGCAAGGCTTTCCCCGGGGAGGCCGACTGCCTCCGCGCCGTCGAGGACTGCGTCGCTTCGGCTGTACCATTCTCTACAACACAAAGTCAAAGCGGGCATATTTCTTCTGTCTTT…	chr2H:115162146-115191292	Horvu_OUN333_2H01G214600	ATGGAGATCGCGGCGGAGCCCGTGAGGCTCACGGAGGAGCAGCGCCGCCGCATCGAGGCCAGCCGCCTCGCCGCCCTCGAGAGGCTCAAGCGCTCCGCCGCCGCCGCCGGCACCACCACCGAGTCGTTCAGGCTCGCCAAGTGCCCAAGAATCGCCCACCCCCTGCCCCCGCGTCCTTGCCCGCCGCCGCAGACGCTGCCGCCGCCTGCGCCTCCGACGGGGTTCCGGGCGGTGCTGGAGTTGTGCAGCCCCGACGAGTTCCAGGTCACAGTCGGCCGAGCGGAGGGCAAGGCTTTCCCCGGGGAGGCCGACTGCCTCCGCGCCGTCGAGGACTGCGTCGCTTCGGCTGTACCATTCTCTACAACACAAAGTCAAAGCGGGCATATTTCTTCTGTCTTT…	chr2H:123053953-123083654
	SMARCAL1_2	N/A	N/A	chr2:75908546-75908281	Horvu_AKASHIN_2H01G170000	ATGGCGGGCCTAGGCGGCGCCGGCGGCTGGGGCGGCGGCTTAGACGACGACGACTGGGGCCTAAGCGAGGAGCAGTACGACAAGCTCGAGCAGGACGCCTACCGCGCGATTGCGGAGCGCAAGGCCTCCTCTTCCGCCGCCTCCACCGCCCCCGCAATCTCGCCGCTCCCCCACCGCGCCCTACCGCCGGCGGCCACGGTCTCTTCGCCGCTCAGGAACGAGCACCCCGCCTCCAGGGTCTCCCTGGAGTCTCGCTTCGGCAAGGTAGAATCACTTTCACCTTCTCGGCTTAATCAACCAAACACAGTGAATGATAGCCAGGGCAGTTGGCCTAAGATATCTATACATCTTTTCCTTCATTCTAGTGGTGTGATTGCAGCGAAGTTCCCCTATCACCAG…	chr2H:77648941-77686327	Horvu_BARKE_2H01G180000	ATGGCGGGCCTAGGCGGCGCCGGCGGCTGGGGCGGCGGCTTAGACGACGACGACTGGGGCCTAAGCGAGGAGCAGTACGACAAGCTCGAGCAGGACGCCTACCGCGCGATTGCGGAGCGCAAGGCCTCCTCTTCCGCCGCCTCCACCGCCCCCGCAATCTCGCCGCTCCCCCACCGCGCCCTACCGCCGGCGGCCACGGTCTCTTCGCCGCTCAGGAACGAGCACCCCGCCTCCAGGGTCTCCCTGGAGTCTCGCTTCGGCAAGGTAGAATCACTTTCACCTTCTCGGCTTAATCAACCAAACACAGTGAATGATAGCCAGGGCAGTTGGCCTAAGATATCTATACATCTTTTCCTTCATTCTAGTGGTGTGATTGCAGCGAAGTTCCCCTATCACCAG…	chr2H:71666385-71701546	Horvu_GOLDEN_2H01G148300	ATGGCGGGCCTAGGCGGCGCCGGCGGCTGGGGCGGCGGCTTAGACGACGACGACTGGGGCCTAAGCGAGGAGCAGTACGACAAGCTCGAGCAGGACGCCTACCGCGCGATTGCGGAGCGCAAGGCCTCCTCTTCCGCCGCCTCCACCGCCCCCGCAATCTCGCCGCTCCCCCACCGCGCCCTACCGCCGGCGGCCACGGTCTCTTCGCCGCTCAGGAACGAGCACCCCGCCTCCAGGGTCTCCCTGGAGTCTCGCTTCGGCAAGGTAGAATCACTTTCACCTTCTCGGCTTAATCAACCAAACACAGTGAATGATAGCCAGGGCAGTTGGCCTAAGATATCTATACATCTTTTCCTTCATTCTAGTGGTGTGATTGCAGCGAAGTTCCCCTATCACCAG…	chr2H:60177737-60212579	Horvu_HOCKETT_2H01G154600	ATGGCGGGCCTAGGCGGCGCCGGCGGCTGGGGCGGCGGCTTAGACGACGACGACTGGGGCCTAAGCGAGGAGCAGTACGACAAGCTCGAGCAGGACGCCTACCGCGCGATTGCGGAGCGCAAGGCCTCCTCTTCCGCCGCCTCCACCGCCCCCGCAATCTCGCCGCTCCCCCACCGCGCCCTACCGCCGGCGGCCACGGTCTCTTCGCCGCTCAGGAACGAGCACCCCGCCTCCAGGGTCTCCCTGGAGTCTCGCTTCGGCAAGGTAGAATCACTTTCACCTTCTCGGCTTAATCAACCAAACACAGTGAATGATAGCCAGGGCAGTTGGCCTAAGATATCTATACATCTTTTCCTTCATTCTAGTGGTGTGATTGCAGCGAAGTTCCCCTATCACCAG…	chr2H:65121092-65156244	Horvu_10350_2H01G176000	ATGGCGGGCCTAGGCGGCGCCGGCGGCTGGGGCGGCGGCTTAGACGACGACGACTGGGGCCTAAGCGAGGAGCAGTACGACAAGCTCGAGCAGGACGCCTACCGCGCGATTGCGGAGCGCAAGGCCTCCTCTTCCGCCGCCTCCACCGCCCCCGCAATCTCGCCGCTCCCCCACCGCGCCCTACCGCCGGCGGCCACGGTCTCTTCGCCGCTCAGGAACGAGCACCCCGCCTCCAGGGTCTCCCTGGAGTCTCGCTTCGGCAAGGTAGAATCACTTTCACCTTCTCGGCTTAATCAACCAAACACAGTGAATGATAGCCAGGGCAGTTGGCCTAAGATATCTATACATCTTTTCCTTCATTCTAGTGGTGTGATTGCAGCGAAGTTCCCCTATCACCAG…	chr2H:72479044-72513748	Horvu_13821_2H01G173700	ATGGCGGGCCTAGGCGGCGCCGGCGGCTGGGGCGGCGGCTTAGACGACGACGACTGGGGCCTAAGCGAGGAGCAGTACGACAAGCTCGAGCAGGACGCCTACCGCGCGATTGCGGAGCGCAAGGCCTCCTCTTCCGCCGCCTCCACCGCCCCCGCAATCTCGCCGCTCCCCCACCGCGCCCTACCGCCGGCGGCCACGGTCTCTTCGCCGCTCAGGAACGAGCACCCCGCCTCCAGGGTCTCCCTGGAGTCTCGCTTCGGCAAGGTAGAATCACTTTCACCTTCTCGGCTTAATCAACCAAACACAGTGAATGATAGCCAGGGCAGTTGGCCTAAGATATCTATACATCTTTTCCTTCATTCTAGTGGTGTGATTGCAGCGAAGTTCCCCTATCACCAG…	chr2H:76909381-76944664	Horvu_13942_2H01G171800	ATGGCGGGCCTAGGCGGCGCCGGCGGCTGGGGCGGCGGCTTAGACGACGACGACTGGGGCCTAAGCGAGGAGCAGTACGACAAGCTCGAGCAGGACGCCTACCGCGCGATTGCGGAGCGCAAGGCCTCCTCTTCCGCCGCCTCCACCGCCCCCGCAATCTCGCCGCTCCCCCACCGCGCCCTACCGCCGGCGGCCACGGTCTCTTCGCCGCTCAGGAACGAGCACCCCGCCTCCAGGGTCTCCCTGGAGTCTCGCTTCGGCAAGGTAGAATCACTTTCACCTTCTCGGCTTAATCAACCAAACACAGTGAATGATAGCCAGGGCAGTTGGCCTAAGATATCTATACATCTTTTCCTTCATTCTAGTGGTGTGATTGCAGCGAAGTTCCCCTATCACCAG…	chr2H:73464864-73499941	Horvu_21599_2H01G170800	ATGGCGGGCCTAGGCGGCGCCGGCGGCTGGGGCGGCGGCTTAGACGACGACGACTGGGGCCTAAGCGAGGAGCAGTACGACAAGCTCGAGCAGGACGCCTACCGCGCGATTGCGGAGCGCAAGGCCTCCTCTTCCGCCGCCTCCACCGCCCCCGCAATCTCGCCGCTCCCCCACCGCGCCCTACCGCCGGCGGCCACGGTCTCTTCGCCGCTCAGGAACGAGCACCCCGCCTCCAGGGTCTCCCTGGAGTCTCGCTTCGGCAAGGTAGAATCACTTTCACCTTCTCGGCTTAATCAACCAAACACAGTGAATGATAGCCAGGGCAGTTGGCCTAAGATATCTATACATCTTTTCCTTCATTCTAGTGGTGTGATTGCAGCGAAGTTCCCCTATCACCAG…	chr2H:76565418-76600634	Horvu_3081_2H01G173800	ATGGCGGGCCTAGGCGGCGCCGGCGGCTGGGGCGGCGGCTTAGACGACGACGACTGGGGCCTAAGCGAGGAGCAGTACGACAAGCTCGAGCAGGACGCCTACCGCGCGATTGCGGAGCGCAAGGCCTCCTCTTCCGCCGCCTCCACCGCCCCCGCAATCTCGCCGCTCCCCCACCGCGCCCTACCGCCGGCGGCCACGGTCTCTTCGCCGCTCAGGAACGAGCACCCCGCCTCCAGGGTCTCCCTAGAGTCTCGCTTCGGCAAGGTAGAATCACTTTCACCTTCTCGGCTTAATCAACCAAACACAGTGAATGATAGCCAGGGCAGTTGGCCTAAGATATCTATACATCTTTTCCTTCATTCTAGTGGTGTGATTGCAGCGAAGTTCCCCTATCACCAG…	chr2H:73710059-73744431	Horvu_HHOR_2H01G168000	ATGGCGGGCCTAGGCGGCGCCGGCGGCTGGGGCGGCGGCTTAGACGACGACGACTGGGGCCTAAGCGAGGAGCAGTACGACAAGCTCGAGCAGGACGCCTACCGCGCGATTGCGGAGCGCAAGGCCTCCTCTTCCGCCGCCTCCACCGCCCCCGCAATCTCGCCGCTCCCCCACCGCGCCCTACCGCCGGCGGCCACGGTCTCTTCGCCGCTCAGGAACGAGCACCCCGCCTCCAGGGTCTCCCTGGAGTCTCGCTTCGGCAAGGTAGAATCACTTTCACCTTCTCGGCTTAATCAACCAAACACAGTGAATGATAGCCAGGGCAGTTGGCCTAAGATATCTATACATCTTTTCCTTCATTCTAGTGGTGTGATTGCAGCGAAGTTCCCCTATCACCAG…	chr2H:79119858-79154728	Horvu_7552_2H01G172700	ATGGCGGGCCTAGGCGGCGCCGGCGGCTGGGGCGGCGGCTTAGACGACGACGACTGGGGCCTAAGCGAGGAGCAGTACGACAAGCTCGAGCAGGACGCCTACCGCGCGATTGCGGAGCGCAAGGCCTCCTCTTCCGCCGCCTCCACCGCCCCCGCAATCTCGCCGCTCCCCCACCGCGCCCTACCGCCGGCGGCCACGGTCTCTTCGCCGCTCAGGAACGAGCACCCCGCCTCCAGGGTCTCCCTGGAGTCTCGCTTCGGCAAGGTAGAATCACTTTCACCTTCTCGGCTTAATCAACCAAACACAGTGAATGATAGCCAGGGCAGTTGGCCTAAGATATCTATACATCTTTTCCTTCATTCTAGTGGTGTGATTGCAGCGAAGTTCCCCTATCACCAG…	chr2H:72176018-72211006	Horvu_8148_2H01G175600	ATGGCGGGCCTAGGCGGCGCCGGCGGCTGGGGCGGCGGCTTAGACGACGACGACTGGGGCCTAAGCGAGGAGCAGTACGACAAGCTCGAGCAGGACGCCTACCGCGCGATTGCGGAGCGCAAGGCCTCCTCTTCCGCCGCCTCCACCGCCCCCGCAATCTCGCCGCTCCCCCACCGCGCCCTACCGCCGGCGGCCACGGTCTCTTCGCCGCTCAGGAACGAGCACCCCGCCTCCAGGGTCTCCCTAGAGTCTCGCTTCGGCAAGGTAGAATCACTTTCACCTTCTCGGCTTAATCAACCAAACACAGTGAATGATAGCCAGGGCAGTTGGCCTAAGATATCTATACATCTTTTCCTTCATTCTAGTGGTGTGATTGCAGCGAAGTTCCCCTATCACCAG…	chr2H:75010766-75045641	Horvu_9043_2H01G173300	ATGGCGGGCCTAGGCGGCGCCGGCGGCTGGGGCGGCGGCTTAGACGACGACGACTGGGGCCTAAGCGAGGAGCAGTACGACAAGCTCGAGCAGGACGCCTACCGCGCGATTGCGGAGCGCAAGGCCTCCTCTTCCGCCGCCTCCACCGCCCCCGCAATCTCGCCGCTCCCCCACCGCGCCCTACCGCCGGCGGCCACGGTCTCTTCGCCGCTCAGGAACGAGCACCCCGCCTCCAGGGTCTCCCTGGAGTCTCGCTTCGGCAAGGTAGAATCACTTTCACCTTCTCGGCTTAATCAACCAAACACAGTGAATGATAGCCAGGGCAGTTGGCCTAAGATATCTATACATCTTTTCCTTCATTCTAGTGGTGTGATTGCAGCGAAGTTCCCCTATCACCAG…	chr2H:75598315-75633637	Horvu_IGRI_2H01G173000	ATGGCGGGCCTAGGCGGCGCCGGCGGCTGGGGCGGCGGCTTAGACGACGACGACTGGGGCCTAAGCGAGGAGCAGTACGACAAGCTCGAGCAGGACGCCTACCGCGCGATTGCGGAGCGCAAGGCCTCCTCTTCCGCCGCCTCCACCGCCCCCGCAATCTCGCCGCTCCCCCACCGCGCCCTACCGCCGGCGGCCACGGTCTCTTCGCCGCTCAGGAACGAGCACCCCGCCTCCAGGGTCTCCCTAGAGTCTCGCTTCGGCAAGGTAGAATCACTTTCACCTTCTCGGCTTAATCAACCAAACACAGTGAATGATAGCCAGGGCAGTTGGCCTAAGATATCTATACATCTTTTCCTTCATTCTAGTGGTGTGATTGCAGCGAAGTTCCCCTATCACCAG…	chr2H:72855628-72889765	Horvu_OUN333_2H01G169100	ATGGCGGGCCTAGGCGGCGCCGGCGGCTGGGGCGGCGGCTTAGACGACGACGACTGGGGCCTAAGCGAGGAGCAGTACGACAAGCTCGAGCAGGACGCCTACCGCGCGATTGCGGAGCGCAAGGCCTCCTCTTCCGCCGCCTCCACCGCCCCCGCAATCTCGCCGCTCCCCCACCGCGCCCTACCGCCGGCGGCCACGGTCTCTTCGCCGCTCAGGAACGAGCACCCCGCCTCCAGGGTCTCCCTAGAGTCTCGCTTCGGCAAGGTAGAATCACTTTCACCTTCTCGGCTTAATCAACCAAACACAGTGAATGATAGCCAGGGCAGTTGGCCTAAGATATCTATACATCTTTTCCTTCATTCTAGTGGTGTGATTGCAGCGAAGTTCCCCTATCACCAG…	chr2H:79214747-79250148
[truncated: 15 more columns]

## Sheet: Table S5
Table S5. SNP information of Snf2 family genes in barley accessions.
#CHROM	POS	ID	REF (Morex)	ALT	QUAL	FILTER	INFO	FORMAT	Morex	Akashinriki	Barke	Golden_Promise	Hockett	HOR_10350	HOR_13821	HOR_13942	HOR_21599	HOR_3081	HOR_3365	HOR_7552	HOR_8148	HOR_9043	Igri	OUN333	RGT_Planet	ZDM01467	ZDM02064	B1K-04-12	OUH602
									HORVU.MOREX.r3.7HG0669610	HORVU_AKASHIN_7H01G214100	HORVU_BARKE_7H01G229200	HORVU_GOLDEN_7H01G199000	HORVU_HOCKETT_7H01G211800	HORVU_10350_7H01G231000	HORVU_13821_7H01G215600	HORVU_13942_7H01G215600	HORVU_21599_7H01G225700	HORVU_3081_7H01G223100	HORVU_HHOR_7H01G221600	HORVU_7552_7H01G218800	HORVU_8148_7H01G219300	HORVU_9043_7H01G223900	HORVU_IGRI_7H01G218800	HORVU_OUN333_7H01G225500	HORVU_PLANET_7H01G227300	HORVU_HUANG_7H01G205700	NA	HORVU_FT11_7H01G209900	HORVU_OUH_7H01G211300
Snf2_1	66	.	G	A	.	.	.	GT	0	0	1	1	1	1	1	1	1	1	0	0	1	1	1	0	1	0	NA	1	1
Snf2_1	1283	.	C	T	.	.	.	GT	0	0	0	0	0	0	0	0	0	1	0	0	0	0	1	0	0	0	NA	0	0
Snf2_1	1461	.	G	A	.	.	.	GT	0	0	0	0	0	0	0	0	0	1	0	0	0	0	1	0	0	0	NA	0	0
Snf2_1	1476	.	C	T	.	.	.	GT	0	0	0	0	0	0	0	0	1	0	0	0	0	0	0	0	0	0	NA	0	0
Snf2_1	1795	.	A	G	.	.	.	GT	0	0	0	0	0	0	0	0	0	0	0	0	0	0	0	0	0	0	NA	0	1
Snf2_1	2118	.	C	T	.	.	.	GT	0	0	0	0	0	0	0	0	0	0	0	0	0	0	0	0	0	0	NA	0	1
Snf2_1	2211	.	G	A	.	.	.	GT	0	0	0	0	0	0	0	0	0	0	0	0	0	0	0	0	0	0	NA	1	0
Snf2_1	2487	.	G	C	.	.	.	GT	0	0	0	0	0	0	0	0	0	0	0	0	0	0	0	0	0	0	NA	0	1
Snf2_1	2982	.	C	T	.	.	.	GT	0	0	0	0	0	0	0	0	0	0	0	0	0	0	0	0	0	0	NA	1	0
Snf2_1	3151	.	C	T	.	.	.	GT	0	0	0	0	0	0	0	0	1	1	0	0	0	0	1	0	0	0	NA	0	0
Snf2_1	3240	.	C	T	.	.	.	GT	0	0	0	0	0	0	0	1	0	0	0	0	0	0	0	0	0	0	NA	0	0
Snf2_1	4530	.	T	C	.	.	.	GT	0	0	0	0	0	0	0	1	0	0	0	0	0	0	0	0	0	0	NA	0	0
Snf2_1	4845	.	G	A	.	.	.	GT	0	0	0	0	0	0	0	1	0	0	0	0	0	0	0	0	0	0	NA	0	0
Snf2_1	5090	.	T	C	.	.	.	GT	0	0	0	0	0	0	0	0	0	0	0	0	0	0	0	0	0	0	NA	0	1
Snf2_1	5215	.	G	T	.	.	.	GT	0	0	0	0	0	0	0	0	1	0	0	0	0	0	0	0	0	0	NA	0	0
Snf2_1	5253	.	T	C	.	.	.	GT	0	0	0	0	0	0	0	0	0	0	0	0	0	0	0	0	0	0	NA	0	1
Snf2_1	5606	.	T	C	.	.	.	GT	0	0	1	1	1	1	1	1	1	1	0	0	1	1	1	0	1	0	NA	1	1
Snf2_1	5938	.	A	G	.	.	.	GT	0	0	0	0	0	0	0	0	0	0	0	0	0	0	0	0	0	0	NA	0	1
Snf2_1	6687	.	A	G	.	.	.	GT	0	0	1	1	1	1	1	0	0	0	0	0	1	1	0	0	1	0	NA	0	0
Snf2_1	6900	.	T	A	.	.	.	GT	0	0	1	1	1	1	1	1	1	1	0	0	1	1	1	0	1	0	NA	1	1
Snf2_1	6968	.	C	T	.	.	.	GT	0	0	0	0	0	0	0	1	0	0	0	0	0	0	0	0	0	0	NA	0	0
Snf2_1	7077	.	G	A	.	.	.	GT	0	0	0	0	0	0	0	0	1	1	0	0	0	0	1	0	0	0	NA	0	0
Snf2_1	7324	.	A	C	.	.	.	GT	0	0	0	0	0	0	0	0	0	0	0	0	0	0	0	0	0	0	NA	1	0
Snf2_1	7365	.	A	T	.	.	.	GT	0	0	0	0	0	0	0	0	1	1	0	0	0	0	1	0	0	0	NA	0	0
Snf2_1	7756	.	G	T	.	.	.	GT	0	0	0	0	0	0	0	0	1	0	0	0	0	0	0	0	0	0	NA	0	0
Snf2_1	7866	.	C	T	.	.	.	GT	0	0	0	0	0	0	0	1	0	0	0	0	0	0	0	0	0	0	NA	0	0
Snf2_1	7927	.	T	C	.	.	.	GT	0	0	1	1	1	1	1	1	1	1	0	0	1	1	1	0	1	0	NA	1	1
Snf2_1	8297	.	C	A	.	.	.	GT	0	0	0	0	0	0	0	0	1	0	0	0	0	0	0	0	0	0	NA	0	0
Snf2_1	8794	.	C	A	.	.	.	GT	0	0	0	0	0	0	0	1	0	0	0	0	0	0	0	0	0	0	NA	0	0
Snf2_1	8930	.	G	A	.	.	.	GT	0	0	0	0	0	0	0	1	0	0	0	0	0	0	0	0	0	0	NA	0	0
Snf2_1	9061	.	G	A	.	.	.	GT	0	0	0	0	0	0	0	0	1	0	0	0	0	0	0	0	0	0	NA	0	0
Snf2_1	9318	.	C	T	.	.	.	GT	0	0	0	0	0	0	0	0	0	0	0	0	0	0	0	0	0	0	NA	0	1
Snf2_1	9512	.	C	A	.	.	.	GT	0	0	0	0	0	0	0	0	1	0	0	0	0	0	0	0	0	0	NA	0	0
Snf2_1	9570	.	C	T	.	.	.	GT	0	0	0	0	0	0	0	0	0	0	0	0	0	0	0	0	0	0	NA	1	0
Snf2_1	9662	.	C	T	.	.	.	GT	0	0	0	0	0	0	0	0	0	0	0	0	0	0	0	0	0	0	NA	1	0
Snf2_1	9712	.	G	T	.	.	.	GT	0	0	0	0	0	0	0	1	0	0	0	0	0	0	0	0	0	0	NA	0	0
Snf2_1	9874	.	A	G	.	.	.	GT	0	0	0	0	0	0	0	1	0	0	0	0	0	0	0	0	0	0	NA	0	0
Snf2_1	10068	.	G	T	.	.	.	GT	0	0	0	0	0	0	0	1	0	0	0	0	0	0	0	0	0	0	NA	0	0
Snf2_1	10083	.	C	T	.	.	.	GT	0	0	0	0	0	0	0	0	0	0	0	0	0	0	0	0	0	0	NA	0	1
#CHROM	POS	ID	REF (Morex)	ALT	QUAL	FILTER	INFO	FORMAT	Morex	Akashinriki	Barke	Golden_Promise	Hockett	HOR_10350	HOR_13821	HOR_13942	HOR_21599	HOR_3081	HOR_3365	HOR_7552	HOR_8148	HOR_9043	Igri	OUN333	RGT_Planet	ZDM01467	ZDM02064	B1K-04-12	OUH602
									HORVU.MOREX.r3.6HG0543700	HORVU_AKASHIN_6H01G032000	HORVU_BARKE_6H01G039600	HORVU_GOLDEN_6H01G029500	HORVU_HOCKETT_6H01G035600	HORVU_10350_6H01G037900	HORVU_13821_6H01G035800	HORVU_13942_6H01G034200	HORVU_21599_6H01G037400	HORVU_3081_6H01G036500	HORVU_HHOR_6H01G034300	HORVU_7552_6H01G032500	HORVU_8148_6H01G040600	HORVU_9043_6H01G036000	HORVU_IGRI_6H01G035900	HORVU_OUN333_6H01G035300	HORVU_PLANET_6H01G040300	HORVU_HUANG_6H01G031400	HORVU_CHIBA_6H01G031600	HORVU_FT11_6H01G040500	HORVU_OUH_6H01G033000
Snf2_2	48	.	G	A	.	.	.	GT	0	0	0	0	0	0	0	0	0	0	0	0	0	0	0	0	0	0	0	0	1
Snf2_2	172	.	A	G	.	.	.	GT	0	0	0	0	0	0	1	1	1	0	0	0	0	0	0	0	0	0	0	0	1
Snf2_2	702	.	G	A	.	.	.	GT	0	0	0	0	0	0	1	1	1	0	0	0	0	0	0	0	0	0	0	0	1
Snf2_2	912	.	A	G	.	.	.	GT	0	0	1	1	0	0	0	0	0	0	0	0	0	1	0	0	0	0	0	0	0
Snf2_2	918	.	A	G	.	.	.	GT	0	1	0	0	0	0	0	0	0	0	0	0	0	0	0	1	0	0	1	1	0
Snf2_2	927	.	A	G	.	.	.	GT	0	0	1	1	0	1	1	1	1	0	0	0	1	1	0	0	0	1	0	1	1
Snf2_2	930	.	G	A	.	.	.	GT	0	0	1	1	0	NA	1	1	1	0	0	0	NA	1	0	0	0	NA	0	NA	1
Snf2_2	960	.	A	G	.	.	.	GT	1	1	0	0	1	1	2	2	2	1	1	1	1	0	1	1	1	1	1	1	2
Snf2_2	966	.	G	A	.	.	.	GT	0	0	0	0	0	1	0	0	0	0	0	0	1	0	0	0	0	1	0	0	0
Snf2_2	969	.	G	A	.	.	.	GT	0	0	0	0	0	0	0	0	0	0	0	0	0	0	0	0	0	0	0	1	0
Snf2_2	972	.	G	A	.	.	.	GT	0	0	0	0	0	0	1	1	1	0	0	0	0	0	0	0	0	0	0	0	1
Snf2_2	975	.	G	A	.	.	.	GT	0	1	0	0	0	0	0	0	0	0	0	0	0	0	0	1	0	0	1	0	0
Snf2_2	1144	.	T	C	.	.	.	GT	0	1	0	0	0	0	0	0	0	0	0	0	0	0	0	1	0	0	1	0	0
Snf2_2	1230	.	C	T	.	.	.	GT	0	0	0	0	0	0	0	0	0	0	0	0	0	0	0	0	1	0	0	0	0
Snf2_2	1376	.	C	T	.	.	.	GT	0	0	0	0	0	0	1	1	1	0	0	0	0	0	0	0	0	0	0	0	1
Snf2_2	1618	.	C	T	.	.	.	GT	0	0	0	0	0	0	0	1	0	0	0	0	0	0	0	0	0	0	0	0	1
Snf2_2	2359	.	G	A	.	.	.	GT	0	1	1	1	1	1	1	1	1	0	0	0	1	1	0	1	0	1	1	1	1
Snf2_2	2816	.	C	T	.	.	.	GT	0	0	0	0	0	0	1	1	1	0	0	0	0	0	0	0	0	0	0	0	1
Snf2_2	2926	.	G	A	.	.	.	GT	0	0	0	0	0	0	0	1	0	0	0	0	0	0	0	0	0	0	0	0	0
Snf2_2	3153	.	C	T	.	.	.	GT	0	0	1	1	0	0	0	0	0	0	0	0	0	1	0	0	0	0	0	0	0
Snf2_2	3285	.	G	A	.	.	.	GT	0	0	1	1	0	0	0	0	0	0	0	0	0	1	0	0	0	0	0	0	0
Snf2_2	3288	.	G	A	.	.	.	GT	0	1	0	0	0	0	0	0	0	0	0	0	0	0	0	1	0	0	1	0	0
Snf2_2	3538	.	T	C	.	.	.	GT	0	0	1	1	0	0	0	0	0	0	0	0	0	1	0	0	0	0	0	1	0
Snf2_2	3621	.	C	T	.	.	.	GT	0	0	1	1	0	0	0	0	0	0	0	0	0	1	0	0	0	0	0	1	0
Snf2_2	3747	.	C	T	.	.	.	GT	0	0	1	1	0	0	0	0	0	0	0	0	0	1	0	0	0	0	0	1	0
Snf2_2	4272	.	T	C	.	.	.	GT	0	0	0	0	0	0	0	1	0	0	0	0	0	0	0	0	0	0	0	0	0
Snf2_2	4545	.	C	T	.	.	.	GT	0	0	1	1	1	0	0	0	0	0	0	0	0	1	0	0	0	0	0	0	0
Snf2_2	4701	.	C	A	.	.	.	GT	0	0	1	1	0	0	0	0	0	0	0	0	0	1	0	0	0	0	0	1	0
Snf2_2	4815	.	T	G	.	.	.	GT	0	0	1	1	0	0	0	0	0	0	0	0	0	1	0	0	0	0	0	1	0
Snf2_2	4878	.	T	C	.	.	.	GT	0	0	1	1	0	0	0	0	0	0	0	0	0	1	0	0	0	0	0	1	0
Snf2_2	4894	.	A	C	.	.	.	GT	0	0	1	1	0	0	0	0	0	0	0	0	0	1	0	0	0	0	0	1	0
Snf2_2	4899	.	C	T	.	.	.	GT	0	0	1	1	0	0	0	0	0	0	0	0	0	1	0	0	0	0	0	1	0
Snf2_2	4935	.	C	T	.	.	.	GT	0	0	1	1	1	0	0	0	0	0	0	0	0	1	0	0	0	0	0	1	0
Snf2_2	4950	.	C	T	.	.	.	GT	0	0	1	1	1	0	0	0	0	0	0	0	0	1	0	0	0	0	0	1	0
Snf2_2	5009	.	C	T	.	.	.	GT	0	0	0	0	0	0	0	0	0	0	0	0	0	0	0	0	0	0	0	1	0
Snf2_2	5097	.	C	T	.	.	.	GT	0	0	1	1	1	0	0	0	0	0	0	0	0	1	0	0	0	0	0	1	0
Snf2_2	5274	.	A	G	.	.	.	GT	0	1	1	1	0	1	1	1	1	0	0	0	1	1	0	1	0	1	1	1	1
Snf2_2	5439	.	G	A	.	.	.	GT	0	1	0	0	0	0	0	0	0	0	0	0	0	0	0	1	0	0	1	0	0
Snf2_2	5529	.	T	C	.	.	.	GT	0	0	0	0	0	0	0	1	0	0	0	0	0	0	0	0	0	0	0	0	1
Snf2_2	5959	.	G	A	.	.	.	GT	0	0	1	1	0	0	0	0	0	0	0	0	0	1	0	0	0	0	0	1	0
Snf2_2	6094	.	T	A	.	.	.	GT	0	0	0	0	0	1	0	0	0	0	0	0	1	0	0	0	0	1	0	0	0
Snf2_2	6126	.	G	A	.	.	.	GT	0	0	0	0	0	0	0	0	0	0	0	0	0	0	0	0	0	0	0	1	0
Snf2_2	6183	.	T	G	.	.	.	GT	0	1	1	1	0	1	1	1	1	0	0	0	1	1	0	1	0	1	1	1	1
Snf2_2	6263	.	T	C	.	.	.	GT	0	1	1	1	0	0	1	1	1	0	0	0	0	1	0	1	0	0	1	1	1
Snf2_2	6270	.	T	C	.	.	.	GT	0	0	0	0	0	1	0	0	0	0	0	0	1	0	0	0	0	1	0	0	0
Snf2_2	6408	.	T	C	.	.	.	GT	0	0	0	0	0	1	0	0	0	0	0	0	1	0	0	0	0	1	0	0	0
Snf2_2	6462	.	C	G	.	.	.	GT	0	0	0	0	0	1	0	0	0	0	0	0	1	0	0	0	0	1	0	0	0
Snf2_2	6468	.	G	A	.	.	.	GT	0	1	0	0	0	0	0	0	0	0	0	0	0	0	0	1	0	0	1	0	0
Snf2_2	6572	.	C	T	.	.	.	GT	0	1	0	0	0	0	0	0	0	0	0	0	0	0	0	1	0	0	1	0	0
Snf2_2	6585	.	C	T	.	.	.	GT	0	1	0	0	0	0	0	0	0	0	0	0	0	0	0	1	0	0	1	0	0
Snf2_2	6597	.	G	A	.	.	.	GT	0	0	0	0	0	1	0	0	0	0	0	0	1	0	0	0	0	1	0	0	0
Snf2_2	6600	.	A	G	.	.	.	GT	0	0	0	0	0	1	0	0	0	0	0	0	1	0	0	0	0	1	0	0	0
Snf2_2	6609	.	C	T	.	.	.	GT	0	0	0	0	0	1	0	0	0	0	0	0	1	0	0	0	0	1	0	0	0
Snf2_2	6672	.	A	G	.	.	.	GT	0	0	0	0	0	1	0	0	0	0	0	0	1	0	0	0	0	1	0	0	0
#CHROM	POS	ID	REF (Morex)	ALT	QUAL	FILTER	INFO	FORMAT	Morex	Akashinriki	Barke	Golden_Promise	Hockett	HOR_10350	HOR_13821	HOR_13942	HOR_21599	HOR_3081	HOR_3365	HOR_7552	HOR_8148	HOR_9043	Igri	OUN333	RGT_Planet	ZDM01467	ZDM02064	B1K-04-12	OUH602
									HORVU.MOREX.r3.1HG0019730	HORVU_AKASHIN_1H01G114600	HORVU_BARKE_1H01G124900	HORVU_GOLDEN_1H01G091700	HORVU_HOCKETT_1H01G111000	HORVU_10350_1H01G120700	HORVU_13821_1H01G116100	HORVU_13942_1H01G114400	HORVU_21599_1H01G113500	HORVU_3081_1H01G114300	HORVU_HHOR_1H01G119000	HORVU_7552_1H01G119300	HORVU_8148_1H01G116500	HORVU_9043_1H01G116400	HORVU_IGRI_1H01G114600	HORVU_OUN333_1H01G116400	HORVU_PLANET_1H01G118600	HORVU_HUANG_1H01G109700	HORVU_CHIBA_1H01G104100	HORVU_FT11_1H01G123800	HORVU_OUH_1H01G110900
Snf2_3	154	.	T	C	.	.	.	GT	0	1	1	1	1	1	1	1	1	1	0	1	1	1	1	1	1	1	1	1	0
Snf2_3	187	.	G	C	.	.	.	GT	0	0	0	0	0	0	0	0	0	1	0	0	0	0	0	0	0	0	0	0	0
Snf2_3	750	.	G	A	.	.	.	GT	0	1	1	1	1	1	1	1	1	1	0	1	1	1	1	1	1	1	1	1	0
Snf2_3	855	.	T	C	.	.	.	GT	0	1	1	1	1	1	1	1	1	1	0	1	1	1	1	1	1	1	1	1	0
Snf2_3	927	.	G	A	.	.	.	GT	0	1	0	0	0	0	0	0	0	0	0	0	0	0	0	1	0	0	0	0	0
Snf2_3	1476	.	G	T	.	.	.	GT	0	0	0	0	0	0	0	0	0	0	0	0	0	0	0	0	0	1	1	0	0
Snf2_3	1920	.	C	T	.	.	.	GT	0	0	0	0	0	0	0	0	0	0	0	1	0	0	0	0	0	0	0	0	0
Snf2_3	2175	.	A	G	.	.	.	GT	0	1	1	1	1	1	1	1	1	1	0	1	1	1	1	1	1	1	1	1	1
Snf2_3	2188	.	C	T	.	.	.	GT	0	0	0	0	0	0	0	0	0	0	0	0	0	0	0	0	0	1	1	0	0
Snf2_3	2196	.	G	A	.	.	.	GT	0	1	0	0	0	0	0	0	0	0	0	0	0	0	0	1	0	0	0	0	0
Snf2_3	2820	.	C	T	.	.	.	GT	0	0	0	0	0	0	0	0	0	1	0	0	0	0	0	0	0	0	0	0	0
Snf2_3	3228	.	C	T	.	.	.	GT	0	0	1	1	1	1	1	0	0	0	0	1	1	1	1	0	1	0	0	0	0
#CHROM	POS	ID	REF (Morex)	ALT	QUAL	FILTER	INFO	FORMAT	Morex	Akashinriki	Barke	Golden_Promise	Hockett	HOR_10350	HOR_13821	HOR_13942	HOR_21599	HOR_3081	HOR_3365	HOR_7552	HOR_8148	HOR_9043	Igri	OUN333	RGT_Planet	ZDM01467	ZDM02064	B1K-04-12	OUH602
									HORVU.MOREX.r3.2HG0184370	HORVU_AKASHIN_2H01G534300	HORVU_BARKE_2H01G542700	HORVU_GOLDEN_2H01G492500	HORVU_HOCKETT_2H01G508800	HORVU_10350_2H01G539000	HORVU_13821_2H01G534000	HORVU_13942_2H01G532900	HORVU_21599_2H01G532900	HORVU_3081_2H01G533700	NA	HORVU_7552_2H01G534800	HORVU_8148_2H01G534300	HORVU_9043_2H01G534100	HORVU_IGRI_2H01G533400	HORVU_OUN333_2H01G530600	HORVU_PLANET_2H01G536000	HORVU_HUANG_2H01G528100	HORVU_CHIBA_2H01G534200	HORVU_FT11_2H01G539000	HORVU_OUH_2H01G524700
Lsh_1	138	.	G	C	.	.	.	GT	0	0	0	0	0	0	0	0	0	0	NA	0	0	0	0	0	0	0	0	0	1
Lsh_1	328	.	A	G	.	.	.	GT	0	1	1	1	1	0	1	0	1	1	NA	0	1	1	1	0	1	0	1	1	1
Lsh_1	417	.	G	A	.	.	.	GT	0	1	1	1	1	0	1	0	1	0	NA	0	1	1	1	0	1	0	1	1	1
Lsh_1	425	.	C	T	.	.	.	GT	0	0	0	0	0	0	0	0	0	0	NA	0	0	0	0	0	0	0	0	1	0
Lsh_1	471	.	T	C	.	.	.	GT	0	1	1	1	1	0	1	0	1	0	NA	0	1	1	1	0	1	0	1	1	1
Lsh_1	551	.	C	T	.	.	.	GT	0	0	0	0	0	0	0	0	0	0	NA	0	0	0	0	0	0	0	0	1	0
Lsh_1	581	.	G	A	.	.	.	GT	0	1	1	1	1	0	1	0	1	0	NA	0	1	1	1	0	1	0	1	1	1
Lsh_1	583	.	T	G	.	.	.	GT	0	0	0	0	1	0	0	0	0	0	NA	0	1	0	0	0	1	0	0	0	0
Lsh_1	819	.	A	T	.	.	.	GT	0	1	1	1	1	0	1	0	1	0	NA	0	1	1	1	0	1	0	1	1	1
Lsh_1	941	.	A	G	.	.	.	GT	0	1	1	1	1	0	1	0	1	0	NA	0	1	1	1	0	1	0	1	1	1
Lsh_1	978	.	G	A	.	.	.	GT	0	1	1	1	1	0	1	0	1	0	NA	0	1	1	1	0	1	0	1	1	1
Lsh_1	1174	.	C	T	.	.	.	GT	0	1	1	1	1	0	1	0	1	0	NA	0	1	1	1	0	1	0	1	1	1
Lsh_1	1212	.	C	T	.	.	.	GT	0	0	0	0	0	0	0	0	0	0	NA	0	0	1	0	0	0	0	0	0	0
Lsh_1	1442	.	G	T	.	.	.	GT	0	1	0	0	0	0	0	0	0	0	NA	0	0	0	0	0	0	0	1	0	1
Lsh_1	1503	.	G	A	.	.	.	GT	0	0	1	1	0	0	1	0	1	0	NA	0	0	0	1	0	0	0	0	0	0
Lsh_1	1602	.	C	T	.	.	.	GT	0	1	1	1	1	1	1	1	1	1	NA	1	1	1	1	1	1	1	1	1	1
Lsh_1	1663	.	T	C	.	.	.	GT	0	1	1	1	1	0	1	0	1	0	NA	0	1	1	1	0	1	0	1	1	1
Lsh_1	1881	.	G	A	.	.	.	GT	0	0	0	0	0	0	0	0	0	0	NA	0	0	0	0	0	0	0	0	1	0
Lsh_1	1947	.	A	G	.	.	.	GT	0	1	1	1	1	0	1	0	1	1	NA	0	1	1	1	0	1	0	1	1	1
Lsh_1	2113	.	A	G	.	.	.	GT	0	0	0	0	0	0	0	0	0	1	NA	0	0	0	0	0	0	0	0	0	0
Lsh_1	2142	.	G	A	.	.	.	GT	0	0	1	1	0	0	1	0	1	0	NA	0	0	0	1	0	0	0	0	1	0
Lsh_1	2185	.	C	A	.	.	.	GT	0	0	0	0	0	0	0	0	0	1	NA	0	0	0	0	0	0	0	0	0	0
Lsh_1	2241	.	C	T	.	.	.	GT	0	0	0	0	0	0	0	0	0	1	NA	0	0	0	0	0	0	0	0	0	0
Lsh_1	2255	.	C	T	.	.	.	GT	0	0	0	0	0	0	0	0	0	0	NA	0	0	0	0	0	0	0	0	1	0
Lsh_1	2274	.	T	C	.	.	.	GT	0	0	1	1	0	0	1	0	1	1	NA	0	0	0	1	0	0	0	0	1	0
Lsh_1	2333	.	G	C	.	.	.	GT	0	0	1	1	0	0	1	0	1	0	NA	0	0	0	1	0	0	0	0	0	0
#CHROM	POS	ID	REF (Morex)	ALT	QUAL	FILTER	INFO	FORMAT	Morex	Akashinriki	Barke	Golden_Promise	Hockett	HOR_10350	HOR_13821	HOR_13942	HOR_21599	HOR_3081	HOR_3365	HOR_7552	HOR_8148	HOR_9043	Igri	OUN333	RGT_Planet	ZDM01467	ZDM02064	B1K-04-12	OUH602
									HORVU.MOREX.r3.4HG0338270	HORVU_AKASHIN_4H01G050800	HORVU_BARKE_4H01G054600	HORVU_GOLDEN_4H01G044400	HORVU_HOCKETT_4H01G044000	HORVU_10350_4H01G053900	HORVU_13821_4H01G052000	HORVU_13942_4H01G055700	HORVU_21599_4H01G053000	HORVU_3081_4H01G050700	HORVU_HHOR_4H01G053300	HORVU_7552_4H01G051400	HORVU_8148_4H01G052500	HORVU_9043_4H01G049400	HORVU_IGRI_4H01G052000	HORVU_OUN333_4H01G053500	HORVU_PLANET_4H01G050800	HORVU_HUANG_4H01G045100	HORVU_CHIBA_4H01G052700	HORVU_FT11_4H01G054000	HORVU_OUH_4H01G048400
Lsh_2	102	.	C	A	.	.	.	GT	0	1	0	0	0	0	0	1	1	0	0	0	0	0	0	0	0	0	1	0	0
Lsh_2	108	.	C	G,T	.	.	.	GT	0	1	0	0	0	0	0	1	1	0	0	0	0	0	0	0	0	0	1	1	0
Lsh_2	252	.	C	A	.	.	.	GT	0	0	0	0	0	0	0	0	0	0	0	0	0	0	0	0	0	0	0	1	1
Lsh_2	303	.	G	C	.	.	.	GT	0	1	0	0	0	0	0	1	1	0	0	0	0	0	0	0	0	0	1	1	1
Lsh_2	342	.	C	G	.	.	.	GT	0	1	0	0	0	0	0	1	1	0	0	0	0	0	0	0	0	0	1	1	1
Lsh_2	672	.	T	C	.	.	.	GT	0	1	0	0	0	1	0	1	1	0	0	0	0	1	0	0	0	0	1	1	1
Lsh_2	710	.	G	A	.	.	.	GT	0	1	0	0	0	0	0	0	0	0	0	0	0	0	0	0	0	0	1	0	0
Lsh_2	1001	.	T	C	.	.	.	GT	0	1	0	0	0	1	0	1	1	0	0	0	0	1	0	0	0	0	1	1	1
Lsh_2	1099	.	G	A	.	.	.	GT	0	1	0	0	0	0	0	0	0	0	0	0	0	0	0	0	0	0	1	0	0
Lsh_2	1326	.	T	C	.	.	.	GT	0	0	0	0	0	0	0	0	0	0	0	0	0	0	0	0	0	0	0	0	1
Lsh_2	1425	.	G	A	.	.	.	GT	0	1	0	0	0	1	0	1	1	0	0	0	0	1	0	0	0	0	1	1	1
Lsh_2	1435	.	A	G	.	.	.	GT	0	1	0	0	0	1	0	1	1	0	0	0	0	1	0	0	0	0	1	1	1
Lsh_2	1890	.	C	T	.	.	.	GT	0	1	0	0	0	0	0	0	0	0	0	0	0	0	0	0	0	0	1	0	0
Lsh_2	2304	.	C	T	.	.	.	GT	0	0	0	0	0	0	0	0	0	0	0	0	0	0	0	0	0	0	0	1	0
Lsh_2	2405	.	T	C	.	.	.	GT	0	0	0	0	0	1	0	1	1	0	0	0	0	1	0	0	0	0	0	0	1
Lsh_2	2460	.	C	T	.	.	.	GT	0	1	0	0	0	0	0	0	0	0	0	0	0	0	0	0	0	0	1	0	0
Lsh_2	2472	.	G	A	.	.	.	GT	0	1	0	0	0	0	0	0	0	0	0	0	0	0	0	0	0	0	1	0	0
#CHROM	POS	ID	REF (Morex)	ALT	QUAL	FILTER	INFO	FORMAT	Morex	Akashinriki	Barke	Golden_Promise	Hockett	HOR_10350	HOR_13821	HOR_13942	HOR_21599	HOR_3081	HOR_3365	HOR_7552	HOR_8148	HOR_9043	Igri	OUN333	RGT_Planet	ZDM01467	ZDM02064	B1K-04-12	OUH602
									HORVU.MOREX.r3.7HG0646770	HORVU_AKASHIN_7H01G064600	HORVU_BARKE_7H01G071700	HORVU_GOLDEN_7H01G059700	HORVU_10350_7H01G071000	NA	HORVU_13821_7H01G066900	HORVU_13942_7H01G065200	HORVU_21599_7H01G070800	HORVU_3081_7H01G072300	HORVU_HHOR_Un01G006400	HORVU_7552_7H01G069100	HORVU_8148_7H01G066700	NA	HORVU_IGRI_7H01G066900	HORVU_OUN333_7H01G071700	HORVU_PLANET_7H01G069600	HORVU_HUANG_7H01G062000	NA	HORVU_FT11_7H01G051200	HORVU_OUH_Un01G015500
Lsh_3	18	.	G	A	.	.	.	GT	0	0	0	0	0	NA	0	0	0	0	0	0	0	NA	0	0	0	0	NA	1	0
Lsh_3	49	.	G	A	.	.	.	GT	0	0	0	0	0	NA	0	0	0	0	0	1	0	NA	0	1	0	1	NA	0	0
Lsh_3	137	.	T	G	.	.	.	GT	0	0	0	0	0	NA	0	0	0	0	0	0	0	NA	0	0	0	0	NA	1	0
Lsh_3	145	.	G	A	.	.	.	GT	0	0	0	0	0	NA	0	0	0	0	0	0	0	NA	0	0	0	0	NA	1	0
Lsh_3	161	.	T	C	.	.	.	GT	0	0	0	0	0	NA	0	0	0	0	0	0	0	NA	0	0	0	0	NA	1	0
Lsh_3	208	.	G	A	.	.	.	GT	0	0	0	0	0	NA	0	0	0	0	0	0	0	NA	0	0	0	0	NA	1	0
Lsh_3	219	.	T	C	.	.	.	GT	0	0	0	0	0	NA	0	0	0	0	0	1	0	NA	0	1	0	1	NA	1	0
Lsh_3	274	.	C	A	.	.	.	GT	0	0	0	0	0	NA	0	0	0	0	0	1	0	NA	0	1	0	1	NA	0	0
Lsh_3	322	.	A	G	.	.	.	GT	0	0	0	0	0	NA	0	0	0	0	0	1	0	NA	0	1	0	1	NA	1	0
Lsh_3	506	.	A	T	.	.	.	GT	0	0	0	0	0	NA	0	0	0	0	0	1	0	NA	0	1	0	1	NA	0	0
Lsh_3	610	.	A	C	.	.	.	GT	0	0	0	0	0	NA	0	0	0	0	0	1	0	NA	0	1	0	1	NA	1	0
Lsh_3	1557	.	C	T	.	.	.	GT	0	0	0	0	0	NA	0	0	0	0	0	0	0	NA	0	0	0	0	NA	1	0
Lsh_3	1968	.	T	C	.	.	.	GT	0	0	0	0	0	NA	0	0	0	0	0	0	0	NA	0	0	0	0	NA	1	0
Lsh_3	2174	.	A	G	.	.	.	GT	0	0	0	0	0	NA	0	0	0	0	0	0	0	NA	0	0	0	0	NA	1	0
Lsh_3	2319	.	G	A	.	.	.	GT	0	0	0	0	0	NA	0	0	0	0	1	2	0	NA	0	2	0	2	NA	0	0
Lsh_3	2327	.	C	G	.	.	.	GT	0	1	0	0	0	NA	0	0	1	0	NA	0	0	NA	0	0	0	0	NA	1	0
#CHROM	POS	ID	REF (Morex)	ALT	QUAL	FILTER	INFO	FORMAT	Morex	Akashinriki	Barke	Golden_Promise	Hockett	HOR_10350	HOR_13821	HOR_13942	HOR_21599	HOR_3081	HOR_3365	HOR_7552	HOR_8148	HOR_9043	Igri	OUN333	RGT_Planet	ZDM01467	ZDM02064	B1K-04-12	OUH602
									HORVU.MOREX.r3.1HG0022440	HORVU_AKASHIN_1H01G131200	HORVU_BARKE_1H01G141400	HORVU_GOLDEN_1H01G106200	HORVU_HOCKETT_1H01G126800	HORVU_10350_1H01G136800	HORVU_13821_1H01G131100	HORVU_13942_1H01G129300	HORVU_21599_1H01G129900	HORVU_3081_1H01G130900	HORVU_HHOR_1H01G135800	HORVU_7552_1H01G134200	HORVU_8148_1H01G130800	HORVU_9043_1H01G132000	HORVU_IGRI_1H01G131200	HORVU_OUN333_1H01G132800	HORVU_PLANET_1H01G134900	HORVU_HUANG_1H01G125200	HORVU_CHIBA_1H01G120000	HORVU_FT11_1H01G144300	HORVU_OUH_1H01G126600
Iswi_1	91	.	G	C	.	.	.	GT	0	0	0	0	0	0	0	0	0	0	0	0	0	0	0	0	0	0	0	0	1
Iswi_1	143	.	A	T	.	.	.	GT	0	0	0	0	0	0	0	0	0	0	0	0	0	0	0	0	0	0	0	1	1
Iswi_1	152	.	A	C	.	.	.	GT	0	1	1	1	1	1	1	0	1	0	0	0	1	1	0	1	1	0	1	0	0
Iswi_1	177	.	C	T	.	.	.	GT	0	1	1	1	1	1	1	0	1	1	1	0	1	1	1	1	1	0	1	1	1
Iswi_1	474	.	C	T	.	.	.	GT	0	0	0	0	0	0	0	0	0	0	1	0	0	0	0	0	0	0	0	0	0
Iswi_1	1522	.	C	A	.	.	.	GT	0	0	0	0	0	0	0	0	0	0	0	0	0	0	0	0	0	0	0	1	0
Iswi_1	2538	.	C	T	.	.	.	GT	0	0	0	0	0	0	0	0	0	0	0	0	0	0	0	0	0	0	0	1	0
Iswi_1	2850	.	A	G	.	.	.	GT	0	0	0	0	0	0	0	0	0	0	0	0	0	0	0	0	0	0	0	0	1
#CHROM	POS	ID	REF (Morex)	ALT	QUAL	FILTER	INFO	FORMAT	Morex	Akashinriki	Barke	Golden_Promise	Hockett	HOR_10350	HOR_13821	HOR_13942	HOR_21599	HOR_3081	HOR_3365	HOR_7552	HOR_8148	HOR_9043	Igri	OUN333	RGT_Planet	ZDM01467	ZDM02064	B1K-04-12	OUH602
									HORVU.MOREX.r3.3HG0230070	HORVU_AKASHIN_3H01G073000	HORVU_BARKE_3H01G077500	HORVU_GOLDEN_3H01G064700	HORVU_HOCKETT_3H01G067900	HORVU_10350_3H01G073800	HORVU_13821_3H01G073800	HORVU_13942_3H01G073800	HORVU_21599_3H01G074300	HORVU_3081_3H01G069600	HORVU_HHOR_3H01G073200	HORVU_7552_3H01G075800	HORVU_8148_3H01G076400	HORVU_9043_3H01G069900	HORVU_IGRI_3H01G070700	HORVU_OUN333_3H01G074300	HORVU_PLANET_3H01G078500	HORVU_HUANG_3H01G067000	HORVU_CHIBA_3H01G072100	HORVU_FT11_3H01G078100	HORVU_OUH_3H01G071700
Iswi_2	44	.	A	T	.	.	.	GT	0	0	0	0	0	1	0	0	2	0	2	0	2	1	2	0	2	0	0	2	0
Iswi_2	62	.	T	G	.	.	.	GT	0	0	0	0	0	1	0	0	2	0	2	0	2	1	2	0	2	0	0	0	0
Iswi_2	116	.	G	A	.	.	.	GT	0	0	0	0	0	1	0	0	0	0	0	0	0	1	0	0	0	0	0	0	2
Iswi_2	203	.	G	A	.	.	.	GT	0	0	0	0	0	1	0	0	2	0	2	0	2	1	2	0	2	0	0	2	2
Iswi_2	216	.	G	C	.	.	.	GT	0	0	0	0	0	1	0	0	0	0	0	0	0	1	0	0	2	0	0	0	0
Iswi_2	273	.	C	T	.	.	.	GT	0	0	0	0	0	1	0	0	0	0	2	0	2	1	2	0	0	0	0	0	2
Iswi_2	274	.	T	G	.	.	.	GT	0	0	0	0	0	1	0	0	0	0	2	0	2	1	2	0	2	0	0	0	2
Iswi_2	360	.	A	G	.	.	.	GT	0	0	0	0	0	1	0	0	2	0	0	0	0	1	0	0	0	0	0	0	0
Iswi_2	426	.	A	G	.	.	.	GT	0	0	0	0	0	1	0	0	0	0	2	0	2	1	2	0	2	0	0	0	0
Iswi_2	441	.	G	A	.	.	.	GT	0	0	0	0	0	1	0	0	2	0	2	0	2	1	2	0	0	0	0	0	0
Iswi_2	536	.	A	G	.	.	.	GT	0	0	0	0	0	1	0	0	0	0	0	0	0	1	0	0	2	0	0	0	0
Iswi_2	1068	.	C	T	.	.	.	GT	0	0	0	0	0	0	0	0	0	0	1	0	1	0	1	0	1	0	0	0	0
Iswi_2	1134	.	A	G	.	.	.	GT	0	0	0	0	0	0	0	0	0	0	0	0	0	0	0	0	0	0	0	0	1
Iswi_2	1200	.	C	T	.	.	.	GT	0	0	0	0	0	0	0	0	1	0	1	0	1	0	1	0	1	0	0	1	1
Iswi_2	1296	.	A	G	.	.	.	GT	0	0	0	0	0	0	0	0	0	0	1	0	1	0	1	0	0	0	0	0	0
Iswi_2	1437	.	A	G	.	.	.	GT	0	0	0	0	0	0	0	0	1	0	0	0	0	0	0	0	0	0	0	0	0
Iswi_2	2133	.	G	C	.	.	.	GT	0	0	0	0	0	0	0	0	0	0	0	0	0	0	0	0	0	0	0	0	1
Iswi_2	2234	.	A	C	.	.	.	GT	0	0	0	0	0	0	0	0	0	0	0	0	0	0	0	0	1	0	0	0	0
Iswi_2	2859	.	G	A	.	.	.	GT	0	0	0	0	0	0	0	0	0	0	0	0	0	0	0	0	1	0	0	0	0
Iswi_2	2937	.	C	T	.	.	.	GT	0	0	0	0	0	0	0	0	0	0	0	0	0	0	0	0	0	0	0	1	0
Iswi_2	2988	.	A	G	.	.	.	GT	0	0	0	0	0	0	0	0	0	0	1	0	1	0	1	0	0	0	0	0	0
Iswi_2	3055	.	C	T	.	.	.	GT	0	0	0	0	0	0	0	0	0	0	0	0	0	0	0	0	1	0	0	0	0
Iswi_2	3114	.	G	A	.	.	.	GT	0	0	0	0	0	0	0	0	0	0	0	0	0	0	0	0	1	0	0	0	0
Iswi_2	3174	.	C	G	.	.	.	GT	0	0	0	0	0	0	0	0	0	0	0	0	0	0	0	0	1	0	0	0	0
Iswi_2	3177	.	T	A	.	.	.	GT	0	0	0	0	0	0	0	0	0	0	0	0	0	0	0	0	1	0	0	0	0
Iswi_2	3219	.	T	G	.	.	.	GT	0	0	0	0	0	0	0	0	0	0	0	0	0	0	0	0	1	0	0	0	0
Iswi_2	3256	.	C	G	.	.	.	GT	0	0	0	0	0	0	0	0	1	0	1	0	1	0	1	0	1	0	0	1	1
Iswi_2	3312	.	G	T	.	.	.	GT	0	0	0	0	0	0	0	0	0	0	0	0	0	0	0	0	1	0	0	0	0
Iswi_2	3336	.	C	A	.	.	.	GT	0	0	0	0	0	0	0	0	0	0	0	0	0	0	0	0	1	0	0	0	0
Iswi_2	3361	.	G	C	.	.	.	GT	0	0	0	0	0	0	0	0	0	0	0	0	0	0	0	0	1	0	0	0	0
Iswi_2	3378	.	C	G	.	.	.	GT	0	0	0	0	0	0	0	0	0	0	1	0	1	0	1	0	0	0	0	0	0
Iswi_2	3405	.	C	T	.	.	.	GT	0	0	0	0	0	0	0	0	1	0	0	0	0	0	0	0	0	0	0	0	0
#CHROM	POS	ID	REF (Morex)	ALT	QUAL	FILTER	INFO	FORMAT	Morex	Akashinriki	Barke	Golden_Promise	Hockett	HOR_10350	HOR_13821	HOR_13942	HOR_21599	HOR_3081	HOR_3365	HOR_7552	HOR_8148	HOR_9043	Igri	OUN333	RGT_Planet	ZDM01467	ZDM02064	B1K-04-12	OUH602
									HORVU.MOREX.r3.4HG0416240	HORVU_AKASHIN_4H01G511900	HORVU_BARKE_4H01G521200	NA	HORVU_HOCKETT_4H01G503100	HORVU_10350_4H01G530900	HORVU_13821_4H01G512400	HORVU_13942_4H01G516400	HORVU_21599_4H01G512500	HORVU_3081_4H01G502500	HORVU_HHOR_4H01G515300	HORVU_7552_4H01G498600	HORVU_8148_4H01G516200	HORVU_9043_4H01G501800	HORVU_IGRI_4H01G512900	HORVU_OUN333_4H01G515400	HORVU_PLANET_4H01G515700	HORVU_HUANG_4H01G501300	HORVU_CHIBA_4H01G508400	HORVU_FT11_4H01G518100	HORVU_OUH_4H01G501900
ALC1	60	.	C	A	.	.	.	GT	0	0	0	NA	1	0	1	0	0	0	0	1	1	0	0	0	0	0	0	0	0
ALC1	268	.	G	A	.	.	.	GT	0	1	0	NA	1	0	1	1	0	0	0	1	1	0	0	1	0	0	1	0	0
ALC1	277	.	C	T	.	.	.	GT	0	0	0	NA	0	0	0	0	0	0	0	0	0	1	0	0	0	0	0	0	0
ALC1	285	.	A	G	.	.	.	GT	0	0	0	NA	0	1	0	0	1	0	1	0	0	0	0	0	0	1	0	0	0
ALC1	341	.	C	G	.	.	.	GT	0	0	0	NA	0	1	0	0	1	0	1	0	0	0	0	0	0	1	0	0	1
ALC1	342	.	A	C	.	.	.	GT	0	0	0	NA	0	1	0	0	1	0	1	0	0	0	0	0	0	1	0	0	1
ALC1	437	.	A	G	.	.	.	GT	0	0	0	NA	0	1	0	0	1	0	1	0	0	0	0	0	0	0	0	0	0
ALC1	438	.	A	T	.	.	.	GT	0	1	0	NA	0	0	0	1	0	0	0	0	0	0	0	1	0	0	1	0	0
ALC1	516	.	C	T	.	.	.	GT	0	0	0	NA	0	0	0	0	0	0	0	0	0	0	0	0	0	1	0	0	0
ALC1	525	.	C	G	.	.	.	GT	0	0	0	NA	0	0	0	0	0	0	0	0	0	0	0	0	0	1	0	0	0
ALC1	537	.	A	C	.	.	.	GT	0	0	0	NA	0	0	0	0	0	0	0	0	0	0	0	0	0	1	0	0	0
ALC1	540	.	A	G	.	.	.	GT	0	0	0	NA	0	0	0	0	0	0	0	0	0	0	0	0	0	1	0	0	0
ALC1	555	.	T	A	.	.	.	GT	0	0	0	NA	0	0	0	0	0	0	0	0	0	0	0	0	0	1	0	0	0
ALC1	591	.	T	C	.	.	.	GT	0	0	0	NA	0	0	0	0	0	0	0	0	0	0	0	0	0	1	0	0	0
ALC1	660	.	A	G	.	.	.	GT	0	0	0	NA	0	0	0	0	0	0	0	0	0	0	0	0	0	1	0	0	0
ALC1	674	.	T	C	.	.	.	GT	0	0	0	NA	0	0	0	0	1	0	0	0	0	0	0	0	0	0	0	0	0
ALC1	691	.	C	T	.	.	.	GT	0	0	0	NA	0	0	0	0	0	0	0	0	0	0	0	0	0	1	0	0	0
ALC1	712	.	A	G	.	.	.	GT	0	0	0	NA	0	0	0	0	0	0	0	0	0	0	0	0	0	1	0	0	0
ALC1	756	.	C	T	.	.	.	GT	0	0	0	NA	0	0	0	0	0	0	0	0	0	0	0	0	0	1	0	0	0
ALC1	757	.	C	A	.	.	.	GT	0	0	0	NA	0	0	0	0	0	0	0	0	0	0	0	0	0	1	0	0	0
ALC1	864	.	G	A	.	.	.	GT	0	0	0	NA	0	0	0	0	0	0	0	0	0	0	0	0	0	1	0	0	0
ALC1	880	.	A	G	.	.	.	GT	0	1	0	NA	0	0	0	0	0	0	0	0	0	0	0	0	0	0	1	0	0
ALC1	889	.	C	T	.	.	.	GT	0	1	0	NA	0	1	0	1	1	0	1	0	0	0	0	1	0	1	1	0	0
ALC1	906	.	G	A	.	.	.	GT	0	0	0	NA	0	0	0	0	0	0	0	0	0	0	0	0	0	1	0	0	0
ALC1	918	.	A	G	.	.	.	GT	0	0	0	NA	0	0	0	0	1	0	0	0	0	0	0	0	0	0	0	0	0
ALC1	937	.	C	T	.	.	.	GT	0	0	0	NA	0	0	0	0	0	0	0	0	0	0	0	0	0	1	0	0	0
ALC1	954	.	A	T	.	.	.	GT	0	0	0	NA	0	0	0	0	0	0	0	0	0	0	0	0	0	1	0	0	0
ALC1	1011	.	G	A	.	.	.	GT	0	1	0	NA	0	1	0	1	1	0	1	0	0	0	0	1	0	1	1	0	0
ALC1	1113	.	C	T	.	.	.	GT	0	1	0	NA	0	1	0	1	1	0	1	0	0	0	0	1	0	1	1	0	0
ALC1	1116	.	T	C	.	.	.	GT	0	1	0	NA	0	1	0	1	1	0	1	0	0	0	0	1	0	1	1	0	0
ALC1	1156	.	C	T	.	.	.	GT	0	0	0	NA	1	0	1	0	0	0	0	1	1	0	0	0	0	0	0	0	1
ALC1	1173	.	T	C	.	.	.	GT	0	1	0	NA	0	1	0	1	1	0	1	0	0	0	0	1	0	1	1	0	0
ALC1	1179	.	G	A	.	.	.	GT	0	1	0	NA	0	1	0	1	1	0	1	0	0	0	0	1	0	1	1	0	0
ALC1	1203	.	T	A	.	.	.	GT	0	1	0	NA	0	1	0	1	1	0	1	0	0	0	0	1	0	1	1	0	0
ALC1	1207	.	C	T	.	.	.	GT	0	0	0	NA	1	0	1	0	0	0	0	1	1	0	0	0	0	0	0	0	1
ALC1	1210	.	C	T	.	.	.	GT	0	0	0	NA	1	0	1	0	0	0	0	1	1	0	0	0	0	0	0	0	0
ALC1	1218	.	C	T	.	.	.	GT	0	0	0	NA	0	1	0	0	0	0	1	0	0	0	0	0	0	0	0	0	0
ALC1	1221	.	A	G	.	.	.	GT	0	1	0	NA	0	1	0	1	1	0	1	0	0	0	0	1	0	1	1	0	0
ALC1	1224	.	C	T	.	.	.	GT	0	1	0	NA	0	1	0	1	1	0	1	0	0	0	0	1	0	1	1	0	0
ALC1	1242	.	G	A	.	.	.	GT	0	1	0	NA	0	1	0	1	1	0	1	0	0	0	0	1	0	1	1	0	0
ALC1	1245	.	G	A	.	.	.	GT	0	1	0	NA	0	1	0	1	1	0	1	0	0	0	0	1	0	1	1	0	0
ALC1	1278	.	T	C	.	.	.	GT	0	1	0	NA	0	1	0	1	1	0	1	0	0	0	0	1	0	1	1	0	0
ALC1	1284	.	T	C	.	.	.	GT	0	1	0	NA	0	1	0	1	1	0	1	0	0	0	0	1	0	1	1	0	0
ALC1	1287	.	T	A	.	.	.	GT	0	0	0	NA	0	1	0	0	0	0	1	0	0	0	0	0	0	1	0	0	0
ALC1	1291	.	C	G	.	.	.	GT	0	1	0	NA	0	1	0	1	1	0	1	0	0	0	0	1	0	1	1	0	0
ALC1	1332	.	G	A	.	.	.	GT	0	1	0	NA	0	1	0	1	1	0	1	0	0	0	0	1	0	1	1	0	0
ALC1	1339	.	A	G	.	.	.	GT	0	1	0	NA	0	1	0	1	1	0	1	0	0	0	0	1	0	1	1	0	0
ALC1	1362	.	G	A	.	.	.	GT	0	1	0	NA	0	1	0	1	1	0	1	0	0	0	0	1	0	1	1	0	0
ALC1	1383	.	C	T	.	.	.	GT	0	0	0	NA	0	0	0	0	1	0	0	0	0	0	0	0	0	0	0	0	0
ALC1	1389	.	C	T	.	.	.	GT	0	1	0	NA	0	1	0	1	1	0	1	0	0	0	0	1	0	1	1	0	0
ALC1	1413	.	A	G	.	.	.	GT	0	1	0	NA	0	1	0	1	1	0	1	0	0	0	0	1	0	1	1	0	0
ALC1	1425	.	T	C	.	.	.	GT	0	1	0	NA	0	0	0	1	0	0	0	0	0	0	0	1	0	0	1	0	0
ALC1	1446	.	T	C	.	.	.	GT	0	1	0	NA	0	1	0	1	1	0	1	0	0	0	0	1	0	1	1	0	0
ALC1	1486	.	C	T	.	.	.	GT	0	1	0	NA	0	1	0	1	1	0	1	0	0	0	0	1	0	1	1	0	0
ALC1	1506	.	A	G	.	.	.	GT	0	1	0	NA	1	1	1	1	1	0	1	1	1	1	0	1	0	1	1	1	1
ALC1	1614	.	C	T	.	.	.	GT	0	1	0	NA	0	0	0	1	0	0	0	0	0	0	0	1	0	0	1	0	0
ALC1	1640	.	C	T	.	.	.	GT	0	0	0	NA	0	1	0	0	0	0	1	0	0	0	0	0	0	0	0	0	0
ALC1	1765	.	T	G	.	.	.	GT	0	1	0	NA	0	0	0	1	0	0	0	0	0	0	0	1	0	0	1	0	0
ALC1	1798	.	C	G	.	.	.	GT	0	0	0	NA	0	0	0	0	1	0	0	0	0	0	0	0	0	0	0	0	0
ALC1	1901	.	G	A	.	.	.	GT	0	0	0	NA	1	0	1	0	0	0	0	1	1	1	0	0	0	0	0	1	1
ALC1	1914	.	C	T	.	.	.	GT	0	0	0	NA	1	0	1	0	0	0	0	1	1	1	0	0	0	0	0	1	1
ALC1	1926	.	T	C	.	.	.	GT	0	0	0	NA	0	0	0	0	0	0	0	0	0	0	0	0	0	0	0	1	0
ALC1	1963	.	G	C	.	.	.	GT	0	0	0	NA	1	0	1	0	0	0	0	1	1	1	0	0	0	0	0	1	1
ALC1	2030	.	A	G	.	.	.	GT	0	1	0	NA	0	0	0	1	0	0	0	0	0	0	0	1	0	0	1	0	0
ALC1	2046	.	T	G	.	.	.	GT	0	0	0	NA	1	0	1	0	0	0	0	1	1	1	0	0	0	0	0	1	1
ALC1	2106	.	G	A	.	.	.	GT	0	0	0	NA	1	0	1	0	0	0	0	1	1	1	0	0	0	0	0	1	1
ALC1	2168	.	C	T	.	.	.	GT	0	0	0	NA	0	0	0	0	0	0	0	0	0	1	0	0	0	0	0	1	0
ALC1	2169	.	T	C	.	.	.	GT	0	0	0	NA	1	0	1	0	0	0	0	1	1	1	0	0	0	0	0	1	1
ALC1	2187	.	C	T	.	.	.	GT	0	0	0	NA	1	0	1	0	0	0	0	1	1	1	0	0	0	0	0	1	1
ALC1	2199	.	T	C	.	.	.	GT	0	0	0	NA	1	0	1	0	0	0	0	1	1	1	0	0	0	0	0	1	1
ALC1	2313	.	T	C	.	.	.	GT	0	0	0	NA	1	0	1	0	0	0	0	1	1	1	0	0	0	0	0	1	1
ALC1	2370	.	T	G	.	.	.	GT	0	0	0	NA	1	0	1	0	0	0	0	1	1	1	0	0	0	0	0	1	1
ALC1	2379	.	T	G	.	.	.	GT	0	0	0	NA	1	0	1	0	0	0	0	1	1	0	0	0	0	0	0	0	1
ALC1	2414	.	C	G	.	.	.	GT	0	0	0	NA	0	0	0	0	0	0	0	0	0	0	0	0	0	1	0	0	0
ALC1	2427	.	C	A	.	.	.	GT	0	0	0	NA	0	0	0	0	0	0	0	0	0	1	0	0	0	0	0	1	0
ALC1	2433	.	G	A	.	.	.	GT	0	0	0	NA	0	0	0	0	0	0	0	0	0	0	0	0	0	1	0	0	0
ALC1	2440	.	T	C	.	.	.	GT	0	0	0	NA	0	0	0	0	1	0	0	0	0	0	0	0	0	0	0	0	0
ALC1	2468	.	T	C	.	.	.	GT	0	1	0	NA	0	0	0	1	0	0	0	0	0	0	0	1	0	0	1	0	0
ALC1	2624	.	G	C	.	.	.	GT	0	0	0	NA	0	0	0	0	0	0	0	0	0	0	0	0	0	1	0	0	0
ALC1	2635	.	C	A	.	.	.	GT	0	0	0	NA	1	0	1	0	0	0	0	1	1	1	0	0	0	0	0	1	1
#CHROM	POS	ID	REF (Morex)	ALT	QUAL	FILTER	INFO	FORMAT	Morex	Akashinriki	Barke	Golden_Promise	Hockett	HOR_10350	HOR_13821	HOR_13942	HOR_21599	HOR_3081	HOR_3365	HOR_7552	HOR_8148	HOR_9043	Igri	OUN333	RGT_Planet	ZDM01467	ZDM02064	B1K-04-12	OUH602
									HORVU.MOREX.r3.2HG0116700	HORVU_AKASHIN_2H01G140600	HORVU_BARKE_2H01G149000	HORVU_GOLDEN_2H01G121500	HORVU_HOCKETT_2H01G124600	HORVU_10350_2H01G145100	HORVU_13821_2H01G142600	HORVU_13942_2H01G141500	HORVU_21599_2H01G140300	HORVU_3081_2H01G143500	HORVU_HHOR_2H01G138500	HORVU_7552_2H01G141600	HORVU_8148_2H01G144800	HORVU_9043_2H01G143300	HORVU_IGRI_2H01G142000	HORVU_OUN333_2H01G138500	HORVU_PLANET_2H01G143500	HORVU_HUANG_2H01G133800	HORVU_CHIBA_2H01G139600	HORVU_FT11_2H01G142700	HORVU_OUH_2H01G136200
Chd1	79	.	G	A	.	.	.	GT	0	0	1	1	0	0	0	0	0	1	0	0	0	0	1	0	1	0	0	0	0
Chd1	500	.	G	A	.	.	.	GT	0	0	0	0	1	1	1	1	1	0	1	1	1	1	0	1	0	1	0	0	0
Chd1	590	.	A	G	.	.	.	GT	0	0	0	0	0	0	1	0	0	0	0	0	0	0	0	0	0	0	0	0	0
Chd1	696	.	C	T	.	.	.	GT	0	0	0	0	1	1	1	1	1	0	1	1	1	1	0	1	0	1	0	0	0
Chd1	834	.	C	T	.	.	.	GT	0	0	0	0	0	0	0	0	0	0	0	0	0	0	0	0	0	0	0	0	1
Chd1	1249	.	G	A	.	.	.	GT	0	1	0	0	1	1	1	1	1	0	1	1	1	1	0	1	0	1	1	1	1
Chd1	1311	.	C	T	.	.	.	GT	0	0	1	1	0	0	0	0	0	1	0	0	0	0	1	0	1	0	0	0	0
Chd1	2125	.	A	T	.	.	.	GT	0	0	0	0	1	1	1	1	1	0	1	1	1	1	0	1	0	1	0	0	0
Chd1	2562	.	G	A	.	.	.	GT	0	1	1	1	1	1	1	1	1	1	1	1	1	1	1	1	1	1	1	1	1
Chd1	3767	.	A	G	.	.	.	GT	0	0	0	0	0	0	0	0	0	0	0	0	0	0	1	0	0	0	0	0	0
Chd1	5028	.	T	G	.	.	.	GT	0	1	1	1	1	1	1	1	1	1	1	1	1	1	1	1	1	1	1	1	1
#CHROM	POS	ID	REF (Morex)	ALT	QUAL	FILTER	INFO	FORMAT	Morex	Akashinriki	Barke	Golden_Promise	Hockett	HOR_10350	HOR_13821	HOR_13942	HOR_21599	HOR_3081	HOR_3365	HOR_7552	HOR_8148	HOR_9043	Igri	OUN333	RGT_Planet	ZDM01467	ZDM02064	B1K-04-12	OUH602
									HORVU.MOREX.r3.7HG0658830	HORVU_AKASHIN_7H01G143000	HORVU_BARKE_7H01G157200	HORVU_GOLDEN_7H01G129700	NA	HORVU_10350_7H01G158800	HORVU_13821_7H01G145900	HORVU_13942_7H01G147500	HORVU_21599_7H01G154200	HORVU_3081_7H01G154000	HORVU_HHOR_7H01G149200	HORVU_7552_7H01G149400	HORVU_8148_7H01G147400	HORVU_9043_7H01G152500	HORVU_IGRI_7H01G148300	HORVU_OUN333_7H01G155400	HORVU_PLANET_7H01G154900	HORVU_HUANG_7H01G134300	HORVU_CHIBA_7H01G141500	HORVU_FT11_7H01G132600	HORVU_OUH_7H01G138800
Mi-2_1	90	.	C	T	.	.	.	GT	0	1	0	0	NA	0	0	0	0	0	0	0	0	0	0	1	0	0	1	0	0
Mi-2_1	262	.	A	G	.	.	.	GT	0	0	0	0	NA	0	0	0	0	0	1	0	0	0	0	0	0	0	0	0	0
Mi-2_1	699	.	A	T	.	.	.	GT	0	0	1	0	NA	1	0	0	0	0	0	0	1	1	1	0	0	0	0	0	0
Mi-2_1	909	.	C	T	.	.	.	GT	0	1	0	0	NA	0	0	0	0	0	0	0	0	0	0	1	0	0	1	0	0
Mi-2_1	1169	.	A	G	.	.	.	GT	0	0	0	0	NA	0	0	0	1	0	0	0	0	0	0	0	0	0	0	0	0
Mi-2_1	2085	.	C	T	.	.	.	GT	0	0	0	0	NA	0	0	0	0	0	0	0	0	0	0	0	0	0	0	0	1
Mi-2_1	2235	.	G	A	.	.	.	GT	0	1	1	0	NA	1	0	0	0	1	1	1	1	1	1	1	0	1	1	1	1
Mi-2_1	2376	.	C	T	.	.	.	GT	0	0	1	0	NA	1	0	0	0	0	0	0	1	1	1	0	0	0	0	0	0
Mi-2_1	3155	.	T	C	.	.	.	GT	0	1	1	0	NA	1	0	0	0	1	1	1	1	1	1	1	0	1	1	1	1
Mi-2_1	3675	.	C	T	.	.	.	GT	0	0	0	0	NA	0	0	0	0	0	1	0	0	0	0	0	0	0	0	0	0
#CHROM	POS	ID	REF (Morex)	ALT	QUAL	FILTER	INFO	FORMAT	Morex	Akashinriki	Barke	Golden_Promise	Hockett	HOR_10350	HOR_13821	HOR_13942	HOR_21599	HOR_3081	HOR_3365	HOR_7552	HOR_8148	HOR_9043	Igri	OUN333	RGT_Planet	ZDM01467	ZDM02064	B1K-04-12	OUH602
									HORVU.MOREX.r3.3HG0307470	HORVU_AKASHIN_3H01G549900	HORVU_BARKE_3H01G552300	HORVU_GOLDEN_3H01G520900	HORVU_HOCKETT_3H01G536900	HORVU_10350_3H01G552500	HORVU_13942_3H01G549700	NA	HORVU_21599_3H01G553300	HORVU_3081_3H01G547200	HORVU_HHOR_3H01G545200	HORVU_7552_3H01G555200	HORVU_8148_3H01G553200	HORVU_9043_3H01G545000	HORVU_IGRI_3H01G546100	HORVU_OUN333_3H01G551600	HORVU_PLANET_3H01G555800	HORVU_HUANG_3H01G540900	HORVU_CHIBA_3H01G544200	HORVU_FT11_3H01G561800	HORVU_OUH_3H01G547000
Mi-2_2	39	.	G	T	.	.	.	GT	0	0	0	0	0	0	0	NA	0	0	0	0	0	0	0	0	0	0	0	1	0
Mi-2_2	270	.	T	C	.	.	.	GT	0	0	0	0	0	0	0	NA	0	0	0	0	0	0	0	1	0	0	0	0	0
Mi-2_2	390	.	G	C	.	.	.	GT	0	0	0	0	0	0	0	NA	0	0	0	0	0	0	0	1	0	0	0	0	0
Mi-2_2	482	.	G	A	.	.	.	GT	0	0	0	0	0	0	0	NA	0	0	1	0	0	0	0	0	0	0	0	0	0
Mi-2_2	602	.	G	A	.	.	.	GT	0	0	0	0	0	0	0	NA	0	0	1	0	0	0	0	0	0	0	0	0	0
Mi-2_2	610	.	C	T	.	.	.	GT	0	0	0	0	0	0	0	NA	0	0	0	0	0	0	0	0	0	0	0	0	1
Mi-2_2	768	.	C	T	.	.	.	GT	0	0	0	0	0	0	0	NA	0	0	0	0	0	0	0	0	0	0	1	0	0
Mi-2_2	888	.	C	T	.	.	.	GT	0	0	0	0	0	0	0	NA	0	1	0	0	0	0	0	0	0	0	1	1	0
Mi-2_2	899	.	C	T	.	.	.	GT	0	0	0	0	0	0	0	NA	0	1	0	0	0	0	0	0	0	0	1	0	0
Mi-2_2	1084	.	A	G	.	.	.	GT	0	0	0	0	0	0	0	NA	0	1	0	0	0	0	0	0	0	0	0	0	0
Mi-2_2	1140	.	C	T	.	.	.	GT	0	0	0	0	0	0	0	NA	0	1	0	0	0	0	0	0	0	0	1	0	0
Mi-2_2	1220	.	T	G	.	.	.	GT	0	0	0	0	0	0	0	NA	0	0	0	0	0	0	0	1	0	0	0	0	0
Mi-2_2	1355	.	C	T	.	.	.	GT	0	0	0	0	0	0	0	NA	0	0	0	0	0	0	0	0	0	0	0	1	0
Mi-2_2	1419	.	C	T	.	.	.	GT	0	1	0	0	0	0	0	NA	0	0	0	1	0	0	0	0	0	1	0	0	0
Mi-2_2	1660	.	G	A	.	.	.	GT	0	0	0	0	0	0	0	NA	0	1	0	0	0	0	0	0	0	0	1	0	0
Mi-2_2	1847	.	T	C	.	.	.	GT	0	0	0	0	0	0	0	NA	0	0	0	0	0	0	0	0	0	0	0	0	1
Mi-2_2	1908	.	C	T	.	.	.	GT	0	0	0	0	0	0	0	NA	0	0	0	0	0	0	0	0	0	0	0	1	0
Mi-2_2	2059	.	A	T	.	.	.	GT	0	0	0	0	0	0	0	NA	0	1	0	0	0	0	0	0	0	0	1	0	0
Mi-2_2	2122	.	A	G	.	.	.	GT	0	0	0	0	0	0	0	NA	0	1	1	0	0	0	0	1	0	0	1	1	1
Mi-2_2	2143	.	A	G	.	.	.	GT	0	0	0	0	0	0	0	NA	0	0	0	0	0	0	0	0	0	0	1	0	0
Mi-2_2	2414	.	C	T	.	.	.	GT	0	0	0	0	0	0	0	NA	0	0	1	0	0	0	0	0	0	0	0	0	0
Mi-2_2	2499	.	G	T	.	.	.	GT	0	1	0	0	0	0	0	NA	0	0	0	1	0	0	0	0	0	1	0	0	0
Mi-2_2	2551	.	C	T	.	.	.	GT	0	0	0	0	0	0	0	NA	0	0	0	0	0	0	0	0	0	0	0	1	0
Mi-2_2	2569	.	T	C	.	.	.	GT	0	0	0	0	0	0	0	NA	0	0	0	0	0	0	0	0	0	0	0	0	1
Mi-2_2	2587	.	G	A	.	.	.	GT	0	0	0	0	0	0	0	NA	0	1	0	0	0	0	0	0	0	0	0	0	0
Mi-2_2	2607	.	G	A	.	.	.	GT	0	0	0	0	0	0	0	NA	0	0	0	0	0	0	0	0	0	0	0	0	1
Mi-2_2	2661	.	A	G	.	.	.	GT	0	0	0	0	0	0	0	NA	0	1	0	0	0	0	0	0	0	0	1	0	0
Mi-2_2	2724	.	T	C	.	.	.	GT	0	0	0	0	0	0	0	NA	0	1	1	0	0	0	0	1	0	0	1	1	1
Mi-2_2	2820	.	T	C	.	.	.	GT	0	1	0	0	0	0	0	NA	0	1	1	1	0	0	0	1	0	1	1	1	1
Mi-2_2	2967	.	T	C	.	.	.	GT	0	0	1	0	0	0	0	NA	0	0	0	0	0	0	1	0	1	0	0	0	0
Mi-2_2	2998	.	C	T	.	.	.	GT	0	0	0	0	0	0	0	NA	0	0	1	0	0	0	0	1	0	0	0	0	0
Mi-2_2	3072	.	G	C	.	.	.	GT	0	0	0	0	0	0	0	NA	0	1	0	0	0	0	0	0	0	0	1	0	0
Mi-2_2	3091	.	A	G	.	.	.	GT	0	0	0	0	0	0	0	NA	0	0	0	0	0	0	0	0	0	0	0	1	0
Mi-2_2	3307	.	A	G	.	.	.	GT	0	0	0	0	0	0	0	NA	0	1	1	0	0	0	0	1	0	0	1	0	1
#CHROM	POS	ID	REF (Morex)	ALT	QUAL	FILTER	INFO	FORMAT	Morex	Akashinriki	Barke	Golden_Promise	Hockett	HOR_10350	HOR_13821	HOR_13942	HOR_21599	HOR_3081	HOR_3365	HOR_7552	HOR_8148	HOR_9043	Igri	OUN333	RGT_Planet	ZDM01467	ZDM02064	B1K-04-12	OUH602
									HORVU.MOREX.r3.2HG0143700	HORVU_AKASHIN_2H01G307000	HORVU_BARKE_2H01G317000	HORVU_GOLDEN_2H01G279400	HORVU_HOCKETT_2H01G289900	HORVU_10350_2H01G314700	HORVU_13821_2H01G307600	HORVU_13942_2H01G305900	HORVU_21599_2H01G305400	HORVU_3081_2H01G307200	HORVU_HHOR_2H01G302900	HORVU_7552_2H01G305900	HORVU_8148_2H01G309000	HORVU_9043_2H01G311200	HORVU_IGRI_2H01G307900	HORVU_OUN333_2H01G303200	HORVU_PLANET_2H01G309600	HORVU_HUANG_2H01G300000	HORVU_CHIBA_2H01G306700	HORVU_FT11_2H01G305200	HORVU_OUH_2H01G299000
Mi-2_3	54	.	A	C	.	.	.	GT	0	0	0	0	0	0	0	0	0	0	0	0	0	1	0	0	0	0	0	0	0
Mi-2_3	655	.	A	G	.	.	.	GT	0	0	0	0	0	0	0	0	0	0	0	0	0	0	0	0	0	0	0	1	0
Mi-2_3	1869	.	T	C	.	.	.	GT	0	0	1	1	1	1	1	1	0	1	1	0	1	0	1	0	1	0	0	0	0
Mi-2_3	2353	.	A	C	.	.	.	GT	0	0	0	0	0	0	0	0	0	0	0	1	0	0	0	0	0	0	0	0	0
Mi-2_3	2764	.	C	T	.	.	.	GT	0	0	0	0	0	0	0	0	0	0	0	1	0	0	0	0	0	0	0	1	0
Mi-2_3	3009	.	G	C	.	.	.	GT	0	0	0	0	0	0	0	0	0	0	0	1	0	0	0	0	0	0	0	0	0
Mi-2_3	3945	.	T	C	.	.	.	GT	0	0	0	0	0	0	0	0	0	0	0	0	0	0	0	0	0	0	0	0	1
Mi-2_3	4005	.	T	C	.	.	.	GT	0	0	0	0	0	0	0	0	0	0	1	0	0	0	0	0	0	0	0	0	0
Mi-2_3	4721	.	G	C	.	.	.	GT	0	0	1	1	1	1	1	1	0	1	1	0	1	0	1	0	1	0	0	0	0
Mi-2_3	6155	.	G	T	.	.	.	GT	0	1	1	1	1	1	1	1	1	1	1	1	1	1	1	1	1	1	1	1	1
Mi-2_3	6156	.	T	C	.	.	.	GT	0	1	1	1	1	1	1	1	1	1	1	1	1	1	1	1	1	1	1	1	1
Mi-2_3	6160	.	T	A	.	.	.	GT	0	1	1	1	1	1	1	1	1	1	1	1	1	1	1	1	1	1	1	1	1
Mi-2_3	6161	.	C	G	.	.	.	GT	0	1	1	1	1	1	1	1	1	1	1	1	1	1	1	1	1	1	1	1	1
Mi-2_3	6162	.	A	C	.	.	.	GT	0	1	1	1	1	1	1	1	1	1	1	1	1	1	1	1	1	1	1	1	1
Mi-2_3	6165	.	T	G	.	.	.	GT	0	1	1	1	1	1	1	1	1	1	1	1	1	1	1	1	1	1	1	1	1
Mi-2_3	6168	.	C	G	.	.	.	GT	0	1	1	1	1	1	1	1	1	1	1	1	1	1	1	1	1	1	1	1	1
Mi-2_3	6171	.	C	A	.	.	.	GT	0	1	1	1	1	1	1	1	1	1	1	1	1	1	1	1	1	1	1	1	1
#CHROM	POS	ID	REF (Morex)	ALT	QUAL	FILTER	INFO	FORMAT	Morex	Akashinriki	Barke	Golden_Promise	Hockett	HOR_10350	HOR_13821	HOR_13942	HOR_21599	HOR_3081	HOR_3365	HOR_7552	HOR_8148	HOR_9043	Igri	OUN333	RGT_Planet	ZDM01467	ZDM02064	B1K-04-12	OUH602
									HORVU.MOREX.r3.7HG0748860	HORVU_AKASHIN_7H01G681100	HORVU_BARKE_7H01G703300	HORVU_GOLDEN_7H01G632300	HORVU_HOCKETT_7H01G672700	HORVU_10350_7H01G697800	HORVU_13821_7H01G683200	HORVU_13942_7H01G677800	HORVU_21599_7H01G686800	HORVU_3081_7H01G690900	HORVU_HHOR_7H01G684300	HORVU_7552_7H01G682200	HORVU_8148_7H01G688000	HORVU_9043_7H01G686500	HORVU_IGRI_7H01G683400	HORVU_OUN333_7H01G694700	HORVU_PLANET_7H01G695900	HORVU_HUANG_7H01G657900	HORVU_CHIBA_7H01G674700	HORVU_FT11_7H01G690100	HORVU_OUH_7H01G661400
Swr1	138	.	A	G	.	.	.	GT	0	1	0	1	0	0	0	0	0	0	0	0	0	0	0	0	0	0	1	1	1
Swr1	497	.	C	T	.	.	.	GT	0	0	0	0	0	0	0	0	0	0	0	0	0	0	0	0	0	0	0	1	0
Swr1	521	.	T	C	.	.	.	GT	0	0	0	0	0	0	0	0	1	0	0	0	0	0	0	0	0	0	0	0	0
Swr1	649	.	G	C	.	.	.	GT	0	0	0	1	0	0	0	0	0	0	0	0	0	0	0	0	0	0	0	0	0
Swr1	654	.	G	A	.	.	.	GT	0	1	0	1	0	0	0	0	0	0	0	0	0	0	0	0	0	0	1	1	1
Swr1	702	.	G	A	.	.	.	GT	0	1	0	0	0	0	0	0	0	0	0	0	0	0	0	0	0	0	1	1	0
Swr1	1085	.	A	G	.	.	.	GT	0	1	0	0	0	0	0	0	0	0	0	0	0	0	0	0	0	0	1	1	0
Swr1	1180	.	G	T	.	.	.	GT	0	1	0	0	0	0	0	0	0	0	0	0	0	0	0	0	0	0	1	0	0
Swr1	1233	.	C	T	.	.	.	GT	0	1	0	0	0	0	0	0	0	0	0	0	0	0	0	0	0	0	1	1	0
Swr1	1335	.	C	A	.	.	.	GT	0	1	0	1	0	0	0	0	0	0	0	0	0	0	0	0	0	0	1	1	1
Swr1	1341	.	T	G	.	.	.	GT	0	0	0	0	0	0	0	0	0	0	0	0	0	0	0	0	0	0	0	1	0
Swr1	1485	.	G	A	.	.	.	GT	0	1	0	0	0	0	0	0	0	0	0	0	0	0	0	0	0	0	1	1	0
Swr1	1572	.	T	C	.	.	.	GT	0	1	1	1	0	1	0	0	1	0	0	0	0	0	0	0	1	0	1	1	1
Swr1	2187	.	T	C	.	.	.	GT	0	0	0	1	0	0	0	0	0	0	0	0	0	0	0	0	0	0	0	0	0
Swr1	2193	.	A	T	.	.	.	GT	0	0	0	1	0	0	0	0	0	0	0	0	0	0	0	0	0	0	0	0	0
Swr1	3034	.	C	T	.	.	.	GT	0	0	0	1	0	0	0	0	0	0	0	0	0	0	0	0	0	0	0	0	0
Swr1	3144	.	G	T	.	.	.	GT	0	0	0	0	0	0	0	0	0	0	0	0	0	0	0	0	0	0	0	0	1
Swr1	3295	.	G	C	.	.	.	GT	0	0	0	0	0	1	0	0	0	0	0	0	0	0	0	0	1	0	0	0	0
Swr1	3471	.	A	G	.	.	.	GT	0	1	0	1	0	0	0	0	0	0	0	0	0	0	0	0	0	0	1	1	1
Swr1	3528	.	T	C	.	.	.	GT	0	1	0	1	0	0	0	0	0	0	0	0	0	0	0	0	0	0	1	1	1
Swr1	3549	.	G	A	.	.	.	GT	0	1	0	0	0	0	0	0	0	0	0	0	0	0	0	0	0	0	1	1	0
Swr1	3831	.	G	C	.	.	.	GT	0	1	1	1	0	1	0	0	1	0	0	0	0	0	0	0	1	0	1	1	1
Swr1	4449	.	C	T	.	.	.	GT	0	0	1	0	0	0	0	0	0	0	0	0	0	0	0	0	0	0	0	0	0
Swr1	4864	.	C	G	.	.	.	GT	0	0	0	0	0	0	0	0	0	0	0	0	0	0	0	0	0	0	0	1	0
Swr1	4894	.	G	A	.	.	.	GT	0	1	0	1	0	0	0	0	0	0	0	0	0	0	0	0	0	0	1	1	1
Swr1	5029	.	C	A	.	.	.	GT	0	1	0	1	0	0	0	0	0	0	0	0	0	0	0	0	0	0	1	1	1
Swr1	5085	.	C	T	.	.	.	GT	0	1	0	1	0	0	0	0	0	0	0	0	0	0	0	0	0	0	1	1	1
Swr1	5127	.	A	G	.	.	.	GT	0	1	1	1	0	1	0	0	1	0	0	0	0	0	0	0	1	0	1	1	1
Swr1	5244	.	G	A	.	.	.	GT	0	0	0	1	0	0	0	0	0	0	0	0	0	0	0	0	0	0	0	0	0
Swr1	5256	.	A	C	.	.	.	GT	0	1	0	1	0	0	0	0	0	0	0	0	0	0	0	0	0	0	1	1	1
Swr1	5292	.	T	C	.	.	.	GT	0	0	1	0	0	0	0	0	0	0	0	0	0	0	0	0	0	0	0	0	0
Swr1	5568	.	C	T	.	.	.	GT	0	1	0	1	0	0	0	0	0	0	0	0	0	0	0	0	0	0	1	1	1
Swr1	5746	.	A	G	.	.	.	GT	0	0	0	0	0	0	0	0	1	0	0	0	0	0	0	0	0	0	0	0	0
Swr1	6007	.	C	T	.	.	.	GT	0	0	0	0	0	0	0	0	1	0	0	0	0	0	0	0	0	0	0	0	0
Swr1	6071	.	C	G	.	.	.	GT	0	0	1	0	0	0	0	0	0	0	0	0	0	0	0	0	0	0	0	0	0
Swr1	6110	.	C	T	.	.	.	GT	0	0	0	1	0	0	0	0	0	0	0	0	0	0	0	0	0	0	0	0	0
Swr1	6159	.	A	G	.	.	.	GT	0	1	0	0	0	0	0	0	0	0	0	0	0	0	0	0	0	0	1	0	0
Swr1	6330	.	T	C	.	.	.	GT	0	1	0	1	0	0	0	0	0	0	0	0	0	0	0	0	0	0	1	1	1
Swr1	6477	.	C	T	.	.	.	GT	0	0	0	0	0	1	0	0	0	0	0	0	0	0	0	0	1	0	0	0	0
#CHROM	POS	ID	REF (Morex)	ALT	QUAL	FILTER	INFO	FORMAT	Morex	Akashinriki	Barke	Golden_Promise	Hockett	HOR_10350	HOR_13821	HOR_13942	HOR_21599	HOR_3081	HOR_3365	HOR_7552	HOR_8148	HOR_9043	Igri	OUN333	RGT_Planet	ZDM01467	ZDM02064	B1K-04-12	OUH602
									HORVU.MOREX.r3.4HG0375120	HORVU_AKASHIN_4H01G241100	HORVU_BARKE_4H01G245000	HORVU_GOLDEN_4H01G226300	HORVU_HOCKETT_4H01G232200	HORVU_10350_4H01G246200	HORVU_13821_4H01G244600	HORVU_13942_4H01G247200	HORVU_21599_4H01G244900	HORVU_3081_4H01G241200	HORVU_HHOR_4H01G246900	HORVU_7552_4H01G241200	HORVU_8148_4H01G244400	HORVU_9043_4H01G240800	HORVU_IGRI_4H01G244000	HORVU_OUN333_4H01G245900	HORVU_PLANET_4H01G242500	HORVU_HUANG_4H01G235200	HORVU_CHIBA_4H01G240800	HORVU_FT11_4H01G250500	HORVU_OUH_4H01G236500
Ino80	39	.	C	T	.	.	.	GT	0	0	0	0	0	0	0	0	0	0	0	0	0	0	0	0	0	0	0	1	0
#CHROM	POS	ID	REF (Morex)	ALT	QUAL	FILTER	INFO	FORMAT	Morex	Akashinriki	Barke	Golden_Promise	Hockett	HOR_10350	HOR_13821	HOR_13942	HOR_21599	HOR_3081	HOR_3365	HOR_7552	HOR_8148	HOR_9043	Igri	OUN333	RGT_Planet	ZDM01467	ZDM02064	B1K-04-12	OUH602
									HORVU.MOREX.r3.2HG0187800	HORVU_AKASHIN_2H01G556500	HORVU_BARKE_2H01G564700	HORVU_GOLDEN_2H01G515000	HORVU_HOCKETT_2H01G529400	HORVU_10350_2H01G560800	HORVU_13821_2H01G556200	HORVU_13942_2H01G556200	HORVU_21599_2H01G554800	HORVU_3081_2H01G557400	HORVU_HHOR_2H01G550200	HORVU_7552_2H01G557300	HORVU_8148_2H01G556700	HORVU_9043_2H01G556700	HORVU_IGRI_2H01G556100	HORVU_OUN333_2H01G553700	HORVU_PLANET_2H01G559000	HORVU_HUANG_2H01G550600	HORVU_CHIBA_2H01G555500	HORVU_FT11_2H01G561500	HORVU_OUH_2H01G547200
Etl1	555	.	C	T	.	.	.	GT	0	0	0	0	1	1	0	0	0	0	0	0	0	1	0	0	0	0	0	0	0
Etl1	656	.	C	T	.	.	.	GT	0	0	0	0	1	1	0	0	0	0	0	0	0	1	0	0	0	0	0	0	0
Etl1	966	.	G	A	.	.	.	GT	0	0	0	0	0	0	0	0	0	0	0	0	0	0	0	0	0	0	0	1	0
Etl1	996	.	C	T	.	.	.	GT	0	0	0	0	0	0	0	0	0	0	0	1	1	0	0	1	0	0	0	1	0
Etl1	1232	.	C	T	.	.	.	GT	0	0	0	0	0	0	0	0	0	0	0	1	1	0	0	1	0	0	0	0	0
Etl1	1897	.	C	A	.	.	.	GT	0	0	1	1	0	0	1	1	0	0	0	0	0	0	1	0	1	0	1	0	1
Etl1	2112	.	A	G	.	.	.	GT	0	0	1	1	0	0	1	1	0	0	0	0	0	0	1	0	1	0	1	0	1
Etl1	2149	.	C	A	.	.	.	GT	0	0	0	0	1	1	0	0	0	0	0	0	0	1	0	0	0	0	0	0	0
Etl1	2340	.	A	G	.	.	.	GT	0	0	0	0	0	0	0	0	1	0	0	0	0	0	0	0	0	0	0	0	0
Etl1	2524	.	C	T	.	.	.	GT	0	0	0	0	0	0	0	0	1	0	0	0	0	0	0	0	0	0	0	0	0
#CHROM	POS	ID	REF (Morex)	ALT	QUAL	FILTER	INFO	FORMAT	Morex	Akashinriki	Barke	Golden_Promise	Hockett	HOR_10350	HOR_13821	HOR_13942	HOR_21599	HOR_3081	HOR_3365	HOR_7552	HOR_8148	HOR_9043	Igri	OUN333	RGT_Planet	ZDM01467	ZDM02064	B1K-04-12	OUH602
									HORVU.MOREX.r3.6HG0617770	HORVU_AKASHIN_6H01G460300	HORVU_BARKE_6H01G479400	HORVU_GOLDEN_6H01G430900	HORVU_HOCKETT_6H01G450200	HORVU_10350_6H01G473900	HORVU_13821_6H01G463500	HORVU_13942_6H01G460200	HORVU_21599_6H01G467100	HORVU_3081_6H01G468600	HORVU_HHOR_6H01G459000	HORVU_7552_6H01G463000	HORVU_8148_6H01G475000	HORVU_9043_6H01G465900	HORVU_IGRI_6H01G466900	HORVU_OUN333_6H01G467700	HORVU_PLANET_6H01G472400	HORVU_HUANG_6H01G462300	HORVU_CHIBA_6H01G462700	HORVU_FT11_6H01G474300	HORVU_OUH_6H01G453600
Rad54	81	.	C	T	.	.	.	GT	0	0	0	0	0	0	0	0	0	0	0	0	0	0	0	0	0	0	0	1	0
Rad54	204	.	C	T	.	.	.	GT	0	0	0	0	0	0	0	0	0	0	0	0	0	0	0	0	0	0	0	0	1
Rad54	226	.	G	A	.	.	.	GT	0	0	0	1	0	0	1	0	0	0	0	0	0	0	1	0	0	0	0	0	0
Rad54	375	.	T	A	.	.	.	GT	0	1	1	1	1	1	1	0	1	1	1	1	1	1	1	1	1	1	1	1	1
Rad54	813	.	A	G	.	.	.	GT	0	1	1	1	1	1	1	0	1	1	1	1	1	1	1	1	1	1	0	1	1
Rad54	1752	.	C	T	.	.	.	GT	0	0	0	1	0	0	1	0	0	0	0	0	0	0	1	0	0	0	0	0	0
Rad54	1779	.	A	G	.	.	.	GT	0	1	1	1	1	1	1	0	1	1	1	1	1	1	1	1	1	1	0	1	1
Rad54	2064	.	T	C	.	.	.	GT	0	1	0	0	1	1	0	0	1	1	1	1	1	1	0	1	1	1	0	0	1
Rad54	2426	.	C	G	.	.	.	GT	0	1	1	0	1	1	0	0	1	1	1	1	1	1	0	1	1	1	0	1	1
Rad54	2550	.	T	A	.	.	.	GT	0	0	1	0	0	0	0	0	0	0	0	0	0	0	0	0	0	0	0	0	0
Rad54	2659	.	G	A	.	.	.	GT	0	0	1	0	0	0	0	0	0	0	0	0	0	0	0	0	0	0	0	0	0
Rad54	2862	.	C	T	.	.	.	GT	0	0	0	1	0	0	1	0	0	0	0	0	0	0	1	0	0	0	0	0	0
#CHROM	POS	ID	REF (Morex)	ALT	QUAL	FILTER	INFO	FORMAT	Morex	Akashinriki	Barke	Golden_Promise	Hockett	HOR_10350	HOR_13821	HOR_13942	HOR_21599	HOR_3081	HOR_3365	HOR_7552	HOR_8148	HOR_9043	Igri	OUN333	RGT_Planet	ZDM01467	ZDM02064	B1K-04-12	OUH602
									HORVU.MOREX.r3.1HG0040050	HORVU_AKASHIN_1H01G227300	HORVU_BARKE_1H01G244200	HORVU_GOLDEN_1H01G193000	HORVU_HOCKETT_1H01G217200	HORVU_10350_1H01G237700	HORVU_13821_1H01G224700	HORVU_13942_1H01G223200	HORVU_21599_1H01G223100	HORVU_3081_1H01G232400	HORVU_HHOR_1H01G227700	HORVU_7552_1H01G231500	HORVU_8148_1H01G227300	HORVU_9043_1H01G227400	HORVU_IGRI_1H01G230800	HORVU_OUN333_1H01G225300	HORVU_PLANET_1H01G235600	HORVU_HUANG_1H01G214400	HORVU_CHIBA_1H01G215300	HORVU_FT11_1H01G237000	HORVU_OUH_1H01G217900
ATRX	916	.	A	T	.	.	.	GT	0	0	0	0	0	0	1	0	0	0	0	0	0	0	0	0	0	0	0	0	0
ATRX	1321	.	G	A	.	.	.	GT	0	0	0	0	0	0	1	0	0	0	0	0	0	0	0	0	0	0	0	0	0
ATRX	2467	.	C	A	.	.	.	GT	0	0	0	0	0	0	0	0	0	0	1	0	0	0	0	0	0	0	0	0	0
ATRX	2608	.	A	G	.	.	.	GT	0	0	0	0	0	0	0	0	1	0	0	0	0	0	0	0	0	0	0	0	0
ATRX	3186	.	A	G	.	.	.	GT	0	0	0	0	0	0	1	0	1	0	1	0	0	0	0	0	0	0	0	1	0
ATRX	4326	.	C	T	.	.	.	GT	0	0	0	0	0	0	1	0	0	0	0	0	0	0	0	0	0	0	0	0	0
#CHROM	POS	ID	REF (Morex)	ALT	QUAL	FILTER	INFO	FORMAT	Morex	Akashinriki	Barke	Golden_Promise	Hockett	HOR_10350	HOR_13821	HOR_13942	HOR_21599	HOR_3081	HOR_3365	HOR_7552	HOR_8148	HOR_9043	Igri	OUN333	RGT_Planet	ZDM01467	ZDM02064	B1K-04-12	OUH602
									HORVU.MOREX.r3.2HG0108640	HORVU_AKASHIN_2H01G088900	HORVU_BARKE_2H01G094700	HORVU_GOLDEN_2H01G076200	HORVU_HOCKETT_2H01G077400	HORVU_10350_2H01G093400	HORVU_13821_2H01G090100	HORVU_13942_2H01G088600	HORVU_21599_2H01G091100	HORVU_3081_2H01G091000	HORVU_HHOR_2H01G086600	HORVU_7552_2H01G089400	HORVU_8148_2H01G092500	HORVU_9043_2H01G091700	HORVU_IGRI_2H01G089400	HORVU_OUN333_2H01G087700	HORVU_PLANET_2H01G091800	HORVU_HUANG_2H01G081000	HORVU_CHIBA_2H01G086700	HORVU_FT11_2H01G090900	HORVU_OUH_2H01G082900
DRD1_1	68	.	G	A	.	.	.	GT	0	0	0	1	0	0	0	0	0	0	0	0	0	0	0	0	0	0	0	0	0
DRD1_1	369	.	C	A	.	.	.	GT	0	0	0	0	0	0	0	0	1	0	0	0	0	1	0	1	0	0	0	0	0
DRD1_1	741	.	C	T	.	.	.	GT	0	0	0	0	0	0	0	0	1	0	0	0	0	1	0	1	0	0	0	0	0
DRD1_1	845	.	C	G	.	.	.	GT	0	0	0	0	0	0	0	0	1	0	0	0	0	1	0	1	0	0	0	0	0
DRD1_1	947	.	C	T	.	.	.	GT	0	0	0	0	0	0	0	0	1	0	0	0	0	1	0	1	0	0	0	0	0
DRD1_1	1227	.	C	T	.	.	.	GT	0	0	0	1	0	0	0	0	0	0	0	0	0	0	0	0	0	0	0	0	0
DRD1_1	1369	.	A	T	.	.	.	GT	0	0	0	0	0	0	0	0	1	0	0	0	0	1	0	1	0	0	0	0	0
DRD1_1	1371	.	C	T	.	.	.	GT	0	1	0	0	1	1	0	1	1	1	1	1	0	1	1	1	0	1	1	1	1
DRD1_1	1552	.	G	A	.	.	.	GT	0	0	0	0	0	0	0	0	0	0	0	0	0	0	0	0	0	0	0	0	1
DRD1_1	1641	.	C	T	.	.	.	GT	0	1	0	1	1	1	0	1	1	1	1	1	0	1	1	1	0	1	1	1	1
DRD1_1	2364	.	G	T	.	.	.	GT	0	0	0	0	1	1	0	1	0	1	0	1	0	0	1	0	0	1	0	1	0
DRD1_1	2514	.	G	A	.	.	.	GT	0	0	0	0	0	0	0	0	0	0	0	0	0	0	0	0	0	0	0	1	0
DRD1_1	2516	.	C	T	.	.	.	GT	0	0	0	0	0	0	0	0	0	0	0	0	0	0	0	0	0	0	0	0	1
DRD1_1	2556	.	G	A	.	.	.	GT	0	0	0	1	0	0	0	0	0	0	0	0	0	0	0	0	0	0	0	0	0
DRD1_1	2766	.	G	A	.	.	.	GT	0	0	0	1	0	0	0	0	0	0	0	0	0	0	0	0	0	0	0	0	0
DRD1_1	3390	.	C	T	.	.	.	GT	0	1	0	0	0	0	0	0	0	0	1	0	0	0	0	0	0	0	1	0	0
DRD1_1	3606	.	T	C	.	.	.	GT	0	0	0	0	0	0	0	0	1	0	0	0	0	1	0	1	0	0	0	0	0
DRD1_1	3703	.	A	G	.	.	.	GT	0	0	0	0	0	0	0	0	0	0	0	0	0	0	0	0	0	0	0	0	1
#CHROM	POS	ID	REF (Morex)	ALT	QUAL	FILTER	INFO	FORMAT	Morex	Akashinriki	Barke	Golden_Promise	Hockett	HOR_10350	HOR_13821	HOR_13942	HOR_21599	HOR_3081	HOR_3365	HOR_7552	HOR_8148	HOR_9043	Igri	OUN333	RGT_Planet	ZDM01467	ZDM02064	B1K-04-12	OUH602
									HORVU.MOREX.r3.4HG0402720	HORVU_AKASHIN_4H01G412600	HORVU_BARKE_4H01G418700	HORVU_GOLDEN_4H01G388600	HORVU_HOCKETT_4H01G401300	HORVU_10350_4H01G416700	HORVU_13821_4H01G412000	HORVU_13942_4H01G415500	HORVU_21599_4H01G413700	HORVU_3081_4H01G412000	HORVU_HHOR_4H01G415700	HORVU_7552_4H01G410500	HORVU_8148_4H01G415300	HORVU_9043_4H01G411600	HORVU_IGRI_4H01G413100	HORVU_OUN333_4H01G416300	HORVU_PLANET_4H01G413600	HORVU_HUANG_4H01G403800	HORVU_CHIBA_4H01G409200	HORVU_FT11_4H01G419900	HORVU_OUH_4H01G403700
DRD1_2	109	.	A	G	.	.	.	GT	0	0	0	0	0	0	0	0	0	0	0	1	0	0	0	1	0	0	0	0	0
DRD1_2	142	.	G	C	.	.	.	GT	0	0	0	0	0	0	0	0	0	0	0	1	0	0	0	1	0	0	0	0	0
DRD1_2	492	.	C	T	.	.	.	GT	0	0	0	0	0	0	0	0	0	0	0	0	0	0	1	0	0	0	1	0	0
DRD1_2	813	.	G	C	.	.	.	GT	0	0	0	0	0	0	0	0	0	0	0	0	0	0	0	0	0	0	0	1	0
DRD1_2	2469	.	G	C	.	.	.	GT	0	0	1	1	0	0	0	1	1	1	0	1	0	0	1	1	1	0	1	1	1
DRD1_2	2604	.	A	G	.	.	.	GT	0	0	0	0	0	0	0	0	0	0	0	0	0	0	0	0	0	0	0	1	0
DRD1_2	2610	.	T	G	.	.	.	GT	0	0	1	1	0	0	0	1	1	1	0	0	0	0	0	0	1	0	0	0	0
DRD1_2	2749	.	A	G	.	.	.	GT	0	1	0	0	0	0	0	0	0	0	0	0	0	0	0	0	0	1	0	0	0
DRD1_2	2850	.	T	C	.	.	.	GT	0	0	0	0	0	0	0	0	0	0	0	0	0	0	0	0	0	0	0	0	1
#CHROM	POS	ID	REF (Morex)	ALT	QUAL	FILTER	INFO	FORMAT	Morex	Akashinriki	Barke	Golden_Promise	Hockett	HOR_10350	HOR_13821	HOR_13942	HOR_21599	HOR_3081	HOR_3365	HOR_7552	HOR_8148	HOR_9043	Igri	OUN333	RGT_Planet	ZDM01467	ZDM02064	B1K-04-12	OUH602
									HORVU.MOREX.r3.3HG0271560	HORVU_AKASHIN_3H01G309400	HORVU_BARKE_3H01G312300	HORVU_GOLDEN_3H01G289500	HORVU_HOCKETT_3H01G299500	HORVU_10350_3H01G307800	HORVU_13821_3H01G305400	HORVU_13942_3H01G307000	HORVU_21599_3H01G310900	HORVU_3081_3H01G304100	HORVU_HHOR_3H01G306300	HORVU_7552_3H01G310400	HORVU_8148_3H01G310900	HORVU_9043_3H01G302400	HORVU_IGRI_3H01G303900	HORVU_OUN333_3H01G306700	HORVU_PLANET_3H01G314400	HORVU_HUANG_3H01G298800	HORVU_CHIBA_3H01G303600	HORVU_FT11_3H01G315900	HORVU_OUH_3H01G305100
DRD1_3	84	.	C	T	.	.	.	GT	0	0	0	0	0	0	0	0	0	0	0	0	0	0	0	1	0	0	0	0	0
DRD1_3	121	.	G	A	.	.	.	GT	0	0	1	1	1	0	1	0	0	0	1	0	1	0	1	0	0	0	0	0	0
DRD1_3	168	.	C	G	.	.	.	GT	0	0	1	1	1	0	1	0	0	0	1	0	1	0	1	0	0	0	0	0	0
DRD1_3	299	.	C	T	.	.	.	GT	0	0	0	0	0	0	0	0	1	0	0	0	0	0	0	0	0	0	0	0	0
DRD1_3	335	.	G	C	.	.	.	GT	0	0	1	1	1	0	1	0	0	0	1	0	1	0	1	0	0	0	0	0	1
DRD1_3	1455	.	G	T	.	.	.	GT	0	0	0	0	0	0	0	0	0	0	0	0	0	0	0	0	0	0	0	0	1
DRD1_3	1484	.	G	A	.	.	.	GT	0	1	1	1	1	1	1	1	1	0	1	1	1	1	1	1	1	1	1	1	1
DRD1_3	1685	.	C	T	.	.	.	GT	0	1	0	0	0	1	0	0	0	0	0	1	0	1	0	0	0	1	1	0	0
DRD1_3	1946	.	C	T	.	.	.	GT	0	0	0	0	0	0	0	0	0	0	0	0	0	0	0	1	0	0	0	0	0
DRD1_3	3755	.	A	G	.	.	.	GT	0	1	1	1	1	1	1	1	1	0	1	1	1	1	1	1	1	1	1	1	1
#CHROM	POS	ID	REF (Morex)	ALT	QUAL	FILTER	INFO	FORMAT	Morex	Akashinriki	Barke	Golden_Promise	Hockett	HOR_10350	HOR_13821	HOR_13942	HOR_21599	HOR_3081	HOR_3365	HOR_7552	HOR_8148	HOR_9043	Igri	OUN333	RGT_Planet	ZDM01467	ZDM02064	B1K-04-12	OUH602
									HORVU.MOREX.r3.1HG0064430	HORVU_AKASHIN_1H01G379100	HORVU_BARKE_1H01G394900	HORVU_GOLDEN_1H01G337200	HORVU_HOCKETT_1H01G366500	HORVU_10350_1H01G387400	HORVU_13821_1H01G377900	HORVU_13942_1H01G374300	HORVU_21599_1H01G375100	HORVU_3081_1H01G383000	HORVU_HHOR_1H01G377900	HORVU_7552_1H01G381500	HORVU_8148_1H01G379400	HORVU_9043_1H01G379500	HORVU_IGRI_1H01G377600	HORVU_OUN333_1H01G376800	HORVU_PLANET_1H01G385600	HORVU_HUANG_1H01G365400	HORVU_CHIBA_1H01G365800	HORVU_FT11_1H01G388800	HORVU_OUH_1H01G366600
DRD1_4	89	.	A	G	.	.	.	GT	0	1	1	1	1	1	1	1	1	1	0	1	1	1	1	1	1	1	1	1	1
DRD1_4	222	.	G	A	.	.	.	GT	0	1	0	0	0	0	1	0	0	0	0	0	0	0	0	0	0	0	1	0	0
DRD1_4	327	.	C	T	.	.	.	GT	0	1	0	0	0	0	1	0	0	0	0	0	0	0	0	0	0	0	1	0	0
DRD1_4	353	.	G	A	.	.	.	GT	0	1	0	0	0	0	1	0	0	0	0	0	0	0	0	0	0	0	1	0	0
DRD1_4	357	.	T	C	.	.	.	GT	0	0	0	0	0	0	0	0	0	0	0	0	0	0	0	0	0	0	0	0	1
DRD1_4	393	.	G	C	.	.	.	GT	0	1	0	0	0	0	1	0	0	0	0	0	0	0	0	0	0	0	1	0	0
DRD1_4	417	.	C	A	.	.	.	GT	0	0	0	0	0	0	0	0	0	0	0	0	0	0	0	0	0	0	0	0	1
DRD1_4	490	.	G	T	.	.	.	GT	0	0	1	1	1	0	0	1	1	1	0	0	1	0	1	0	1	0	0	0	0
DRD1_4	643	.	G	C	.	.	.	GT	0	0	0	0	0	0	0	0	0	0	0	0	0	0	0	0	0	0	0	0	1
DRD1_4	1072	.	G	A	.	.	.	GT	0	0	1	1	1	0	0	1	1	1	0	0	1	0	1	0	1	0	0	0	0
DRD1_4	1081	.	A	G	.	.	.	GT	0	0	0	0	0	0	1	0	0	0	0	0	0	0	0	0	0	0	0	0	0
DRD1_4	1224	.	G	A	.	.	.	GT	0	0	0	0	0	1	0	0	0	0	0	0	0	1	0	0	0	0	0	0	0
DRD1_4	1298	.	C	A	.	.	.	GT	0	0	0	0	0	0	1	0	0	0	0	0	0	0	0	0	0	0	0	0	0
DRD1_4	1305	.	G	A	.	.	.	GT	0	0	1	1	1	0	0	1	1	1	0	0	1	0	1	0	1	0	0	0	0
DRD1_4	1846	.	G	A	.	.	.	GT	0	0	0	0	0	0	0	0	0	0	0	0	0	0	0	0	0	0	0	1	0
DRD1_4	1860	.	T	C	.	.	.	GT	0	0	1	1	1	0	0	1	1	1	0	0	1	0	1	0	1	0	0	0	0
DRD1_4	2078	.	A	G	.	.	.	GT	0	0	0	0	0	0	0	0	0	0	0	0	0	0	0	0	0	0	0	0	1
DRD1_4	2182	.	C	A	.	.	.	GT	0	0	0	0	0	0	0	0	0	0	0	0	0	0	0	1	0	0	0	0	0
DRD1_4	4008	.	G	A	.	.	.	GT	0	1	0	0	0	0	0	0	0	0	0	0	0	0	0	0	0	0	1	0	0
#CHROM	POS	ID	REF (Morex)	ALT	QUAL	FILTER	INFO	FORMAT	Morex	Akashinriki	Barke	Golden_Promise	Hockett	HOR_10350	HOR_13821	HOR_13942	HOR_21599	HOR_3081	HOR_3365	HOR_7552	HOR_8148	HOR_9043	Igri	OUN333	RGT_Planet	ZDM01467	ZDM02064	B1K-04-12	OUH602
									HORVU.MOREX.r3.2HG0128530	HORVU_AKASHIN_2H01G218300	HORVU_BARKE_2H01G228200	HORVU_GOLDEN_2H01G193500	HORVU_HOCKETT_2H01G203100	HORVU_10350_2H01G224700	HORVU_13821_2H01G220800	HORVU_13942_2H01G218800	HORVU_21599_2H01G217700	HORVU_3081_2H01G219800	HORVU_HHOR_2H01G214800	HORVU_7552_2H01G220000	HORVU_8148_2H01G222100	HORVU_9043_2H01G222100	HORVU_IGRI_2H01G220300	HORVU_OUN333_2H01G215500	HORVU_PLANET_2H01G222100	HORVU_HUANG_2H01G211800	HORVU_CHIBA_Un01G105400	HORVU_FT11_2H01G219200	HORVU_OUH_2H01G214600
DRD1_5	118	.	G	A	.	.	.	GT	NA	0	0	0	0	1	0	1	1	1	0	0	1	0	0	0	0	0	NA	0	1
DRD1_5	138	.	G	C	.	.	.	GT	NA	0	0	0	0	0	0	0	0	0	0	0	0	0	0	0	0	0	NA	0	1
DRD1_5	977	.	A	G	.	.	.	GT	0	0	0	0	0	1	0	1	1	1	0	0	1	0	0	0	0	0	0	0	1
DRD1_5	2870	.	G	T	.	.	.	GT	0	0	0	0	0	0	0	0	0	0	1	0	0	1	0	0	0	0	0	0	0
#CHROM	POS	ID	REF (Morex)	ALT	QUAL	FILTER	INFO	FORMAT	Morex	Akashinriki	Barke	Golden_Promise	Hockett	HOR_10350	HOR_13821	HOR_13942	HOR_21599	HOR_3081	HOR_3365	HOR_7552	HOR_8148	HOR_9043	Igri	OUN333	RGT_Planet	ZDM01467	ZDM02064	B1K-04-12	OUH602
									HORVU.MOREX.r3.5HG0501840	HORVU_AKASHIN_5H01G472500	HORVU_BARKE_5H01G492700	HORVU_GOLDEN_5H01G447500	HORVU_HOCKETT_5H01G470100	HORVU_10350_5H01G490900	HORVU_13821_5H01G474200	HORVU_13942_5H01G471800	HORVU_21599_5H01G470900	HORVU_3081_5H01G483200	HORVU_HHOR_5H01G475400	HORVU_7552_5H01G475900	HORVU_8148_5H01G484700	HORVU_9043_5H01G481100	HORVU_IGRI_5H01G484500	HORVU_OUN333_5H01G478800	HORVU_PLANET_5H01G484400	HORVU_HUANG_5H01G464600	HORVU_CHIBA_5H01G471500	HORVU_FT11_5H01G483300	HORVU_OUH_5H01G464600
DRD1_6	65	.	G	A	.	.	.	GT	0	0	0	0	0	0	0	0	0	0	0	0	1	0	0	0	0	0	0	0	0
DRD1_6	75	.	C	T	.	.	.	GT	0	0	0	0	0	0	0	0	1	0	0	0	0	0	0	0	0	0	0	0	0
DRD1_6	159	.	G	A	.	.	.	GT	0	0	0	0	0	0	1	0	0	0	0	0	0	0	0	0	0	0	0	0	0
DRD1_6	196	.	A	G	.	.	.	GT	0	0	0	0	0	0	0	0	0	0	0	1	0	0	0	0	0	0	0	0	0
DRD1_6	201	.	G	A	.	.	.	GT	0	0	0	0	0	0	0	0	0	0	0	1	0	0	0	0	0	0	0	0	0
DRD1_6	256	.	A	G	.	.	.	GT	0	1	0	0	0	1	0	1	0	1	0	0	0	1	1	1	0	1	1	0	0
DRD1_6	323	.	C	G	.	.	.	GT	0	0	0	0	0	0	0	0	0	0	0	1	0	0	0	0	0	0	0	0	0
DRD1_6	473	.	A	T	.	.	.	GT	0	0	0	0	0	0	0	0	0	0	0	0	0	0	0	0	0	0	0	1	0
DRD1_6	722	.	T	C	.	.	.	GT	0	0	0	0	0	0	0	0	1	0	0	0	0	0	0	0	0	0	0	0	0
DRD1_6	725	.	C	A	.	.	.	GT	0	1	0	0	0	1	1	1	1	1	1	1	1	1	1	1	0	1	1	1	1
DRD1_6	770	.	C	T	.	.	.	GT	0	0	0	0	0	0	0	0	0	0	0	0	1	0	0	0	0	0	0	0	0
DRD1_6	834	.	T	C	.	.	.	GT	0	0	0	0	0	0	0	0	0	0	1	0	0	0	0	0	0	0	0	0	0
DRD1_6	900	.	T	C	.	.	.	GT	0	0	0	0	0	0	0	0	1	0	0	0	0	0	0	0	0	0	0	0	0
DRD1_6	1002	.	T	C	.	.	.	GT	0	0	0	0	0	0	1	0	1	0	1	0	1	0	0	0	0	0	0	1	1
DRD1_6	1008	.	C	T	.	.	.	GT	0	0	0	0	0	0	1	0	1	0	1	0	1	0	0	0	0	0	0	1	1
DRD1_6	1131	.	G	A	.	.	.	GT	0	1	0	0	0	1	1	1	1	1	1	1	1	1	1	1	0	1	1	1	1
DRD1_6	1164	.	C	T	.	.	.	GT	0	0	0	0	0	0	0	0	0	0	0	0	0	0	0	0	0	0	0	0	1
DRD1_6	1175	.	C	T	.	.	.	GT	0	0	0	0	0	0	0	0	0	0	0	0	0	0	0	0	0	0	0	1	0
DRD1_6	1284	.	C	G	.	.	.	GT	0	0	0	0	0	0	1	0	0	0	1	0	1	0	0	0	0	0	0	1	1
DRD1_6	2025	.	T	C	.	.	.	GT	0	0	0	0	0	0	0	0	1	0	0	0	0	0	0	0	0	0	0	0	0
DRD1_6	2098	.	G	A	.	.	.	GT	0	0	0	0	0	0	1	0	0	0	1	0	1	0	0	0	0	0	0	1	1
DRD1_6	2220	.	A	G	.	.	.	GT	0	0	0	0	0	0	1	0	0	0	1	0	1	0	0	0	0	0	0	1	1
DRD1_6	2368	.	T	C	.	.	.	GT	0	0	0	0	0	0	0	0	0	0	0	0	0	0	0	0	0	0	0	0	1
DRD1_6	2409	.	G	A	.	.	.	GT	0	1	1	1	0	1	1	1	1	1	1	1	1	1	1	1	1	1	1	1	1
DRD1_6	2468	.	C	T	.	.	.	GT	0	0	0	0	0	0	1	0	0	0	1	0	1	0	0	0	0	0	0	1	1
DRD1_6	2616	.	A	G	.	.	.	GT	0	0	0	0	0	0	1	0	0	0	1	0	1	0	0	0	0	0	0	1	1
DRD1_6	2664	.	C	T	.	.	.	GT	0	0	0	0	0	0	0	0	1	0	0	0	0	0	0	0	0	0	0	0	0
DRD1_6	2673	.	T	C	.	.	.	GT	0	0	0	0	0	0	1	0	0	0	1	0	1	0	0	0	0	0	0	1	1
DRD1_6	2754	.	G	A	.	.	.	GT	0	1	0	0	0	1	0	1	0	1	0	1	0	1	1	1	0	1	1	0	0
DRD1_6	2790	.	C	T	.	.	.	GT	0	0	0	0	0	0	0	0	0	0	0	0	0	0	0	0	0	0	0	0	1
DRD1_6	2799	.	T	C	.	.	.	GT	0	0	0	0	0	0	1	0	0	0	1	0	1	0	0	0	0	0	0	1	1
DRD1_6	2838	.	A	C	.	.	.	GT	0	0	0	0	0	0	1	0	0	0	1	0	1	0	0	0	0	0	0	1	1
#CHROM	POS	ID	REF (Morex)	ALT	QUAL	FILTER	INFO	FORMAT	Morex	Akashinriki	Barke	Golden_Promise	Hockett	HOR_10350	HOR_13821	HOR_13942	HOR_21599	HOR_3081	HOR_3365	HOR_7552	HOR_8148	HOR_9043	Igri	OUN333	RGT_Planet	ZDM01467	ZDM02064	B1K-04-12	OUH602
									HORVU_AKASHIN_6H01G339200	NA	HORVU_BARKE_6H01G355400	HORVU_GOLDEN_6H01G317200	HORVU_HOCKETT_6H01G330800	HORVU_10350_6H01G352900	HORVU_13821_6H01G344400	NA	HORVU_21599_6H01G348200	HORVU_3081_6H01G349000	HORVU_HHOR_6H01G338500	HORVU_7552_6H01G343800	HORVU_8148_6H01G351300	HORVU_9043_6H01G344500	HORVU_IGRI_6H01G347000	HORVU_OUN333_6H01G347400	HORVU_PLANET_6H01G349900	HORVU_HUANG_6H01G341600	HORVU_CHIBA_6H01G340900	HORVU_FT11_6H01G356400	HORVU_OUH_6H01G340000
DRD1_7	229	.	G	A	.	.	.	GT	0	NA	0	0	0	0	0	NA	0	1	0	0	0	0	0	0	0	0	0	0	0
DRD1_7	318	.	C	T	.	.	.	GT	0	NA	0	0	0	0	0	NA	0	0	0	1	0	0	0	1	0	0	1	0	0
DRD1_7	374	.	A	G	.	.	.	GT	0	NA	0	0	0	0	0	NA	0	0	0	0	0	0	0	0	0	0	0	1	0
DRD1_7	473	.	C	T	.	.	.	GT	0	NA	0	0	0	0	0	NA	0	1	0	0	0	0	0	0	0	0	0	0	0
DRD1_7	478	.	G	A	.	.	.	GT	0	NA	0	0	0	0	0	NA	0	1	0	0	0	0	0	0	0	0	0	0	0
DRD1_7	559	.	C	T	.	.	.	GT	0	NA	0	0	0	0	0	NA	0	0	0	0	0	0	0	0	0	0	0	1	0
DRD1_7	595	.	C	T	.	.	.	GT	0	NA	0	0	0	0	0	NA	0	0	0	0	0	0	0	0	0	0	0	0	1
DRD1_7	621	.	G	A	.	.	.	GT	0	NA	0	0	0	0	0	NA	0	0	0	0	0	0	0	0	0	0	0	0	1
DRD1_7	912	.	G	A	.	.	.	GT	0	NA	0	1	0	1	1	NA	0	0	0	0	0	1	1	0	0	0	0	0	0
DRD1_7	983	.	C	T	.	.	.	GT	0	NA	0	0	0	0	0	NA	0	0	0	0	0	0	0	0	0	0	0	0	1
DRD1_7	1317	.	A	G	.	.	.	GT	0	NA	0	0	0	0	0	NA	0	0	0	0	0	0	0	0	0	0	0	1	0
DRD1_7	2136	.	A	G	.	.	.	GT	0	NA	0	0	0	0	0	NA	0	0	0	0	0	0	0	0	0	0	0	1	0
DRD1_7	2454	.	G	A	.	.	.	GT	0	NA	0	1	0	1	1	NA	0	0	0	0	0	1	1	0	0	0	0	0	0
DRD1_7	2619	.	G	A	.	.	.	GT	0	NA	0	0	0	0	0	NA	0	0	0	0	0	0	0	0	0	0	0	1	0
#CHROM	POS	ID	REF (Morex)	ALT	QUAL	FILTER	INFO	FORMAT	Morex	Akashinriki	Barke	Golden_Promise	Hockett	HOR_10350	HOR_13821	HOR_13942	HOR_21599	HOR_3081	HOR_3365	HOR_7552	HOR_8148	HOR_9043	Igri	OUN333	RGT_Planet	ZDM01467	ZDM02064	B1K-04-12	OUH602
									HORVU.MOREX.r3.2HG0119710	HORVU_AKASHIN_2H01G160700	HORVU_BARKE_2H01G170500	HORVU_GOLDEN_2H01G139800	HORVU_HOCKETT_2H01G145000	HORVU_10350_2H01G166600	HORVU_13821_2H01G163400	HORVU_13942_2H01G162700	HORVU_21599_2H01G160800	HORVU_3081_2H01G164300	HORVU_HHOR_2H01G158900	HORVU_7552_2H01G163100	HORVU_8148_2H01G166000	HORVU_9043_2H01G164000	HORVU_IGRI_2H01G163000	HORVU_OUN333_2H01G159000	HORVU_PLANET_2H01G164800	HORVU_HUANG_2H01G155400	HORVU_CHIBA_2H01G160100	HORVU_FT11_2H01G163500	HORVU_OUH_2H01G157000
Rad5_16_1	200	.	A	G	.	.	.	GT	0	1	1	1	1	1	1	1	1	0	1	1	0	1	1	1	0	1	1	1	1
Rad5_16_1	1135	.	G	T	.	.	.	GT	0	1	0	0	0	0	0	1	0	0	0	0	0	1	0	0	0	1	1	0	0
Rad5_16_1	1175	.	A	G	.	.	.	GT	0	0	0	0	0	0	1	0	0	0	0	0	0	0	0	0	0	0	0	0	0
Rad5_16_1	1299	.	C	T	.	.	.	GT	0	1	1	1	1	1	1	1	1	0	1	1	0	1	1	1	0	1	1	1	1
Rad5_16_1	1534	.	T	C	.	.	.	GT	0	0	1	1	1	1	0	0	1	0	1	1	0	0	1	1	0	0	0	0	0
Rad5_16_1	1642	.	C	A	.	.	.	GT	0	0	0	0	0	0	1	0	0	0	0	0	0	0	0	0	0	0	0	0	0
Rad5_16_1	1827	.	G	A	.	.	.	GT	0	0	0	0	0	0	0	0	0	0	0	0	0	0	0	0	0	0	0	0	1
Rad5_16_1	2151	.	G	A	.	.	.	GT	0	1	1	1	1	1	1	1	1	0	1	1	0	1	1	1	0	1	1	1	1
#CHROM	POS	ID	REF (Morex)	ALT	QUAL	FILTER	INFO	FORMAT	Morex	Akashinriki	Barke	Golden_Promise	Hockett	HOR_10350	HOR_13821	HOR_13942	HOR_21599	HOR_3081	HOR_3365	HOR_7552	HOR_8148	HOR_9043	Igri	OUN333	RGT_Planet	ZDM01467	ZDM02064	B1K-04-12	OUH602
									HORVU.MOREX.r3.6HG0559070	HORVU_AKASHIN_6H01G126900	HORVU_BARKE_6H01G139900	HORVU_GOLDEN_6H01G115600	HORVU_HOCKETT_6H01G124600	HORVU_HUANG_6H01G128300	HORVU_10350_6H01G136800	HORVU_13821_6H01G133500	HORVU_13942_6H01G131100	HORVU_21599_6H01G136000	HORVU_3081_6H01G133100	HORVU_HHOR_6H01G130500	HORVU_7552_6H01G131200	HORVU_8148_6H01G137300	HORVU_9043_6H01G132600	HORVU_IGRI_6H01G134200	HORVU_OUN333_6H01G131000	HORVU_PLANET_6H01G137300	HORVU_CHIBA_6H01G127900	HORVU_FT11_6H01G136500	HORVU_OUH_6H01G126100
Rad5_16_2	230	.	A	C	.	.	.	GT	0	0	0	0	0	1	0	0	0	1	0	1	1	0	0	0	0	0	0	0	0
Rad5_16_2	639	.	T	C	.	.	.	GT	0	0	1	1	1	0	0	0	0	0	0	0	0	0	0	0	0	1	0	0	0
Rad5_16_2	656	.	T	C	.	.	.	GT	0	0	0	0	0	0	1	0	0	0	0	0	0	0	1	0	0	0	0	0	0
Rad5_16_2	831	.	C	T	.	.	.	GT	0	0	0	0	0	0	1	0	0	0	1	0	0	0	1	0	0	0	0	1	0
Rad5_16_2	2170	.	C	T	.	.	.	GT	0	0	0	0	0	0	1	0	0	0	1	0	0	0	1	0	0	0	0	1	0
Rad5_16_2	2327	.	G	T	.	.	.	GT	0	0	0	0	0	0	1	0	0	0	1	0	0	0	1	0	0	0	0	1	0
Rad5_16_2	2513	.	C	T	.	.	.	GT	0	0	0	0	0	0	0	0	0	0	1	0	0	0	0	0	0	0	0	0	0
#CHROM	POS	ID	REF (Morex)	ALT	QUAL	FILTER	INFO	FORMAT	Morex	Akashinriki	Barke	Golden_Promise	Hockett	HOR_10350	HOR_13821	HOR_13942	HOR_21599	HOR_3081	HOR_3365	HOR_7552	HOR_8148	HOR_9043	Igri	OUN333	RGT_Planet	ZDM01467	ZDM02064	B1K-04-12	OUH602
									HORVU.MOREX.r3.2HG0103780	HORVU_AKASHIN_2H01G053700	HORVU_BARKE_2H01G061200	HORVU_GOLDEN_2H01G049000	HORVU_HOCKETT_2H01G043700	HORVU_10350_2H01G051600	HORVU_13821_2H01G054800	HORVU_13942_2H01G053200	HORVU_21599_2H01G055800	HORVU_3081_2H01G055700	HORVU_HHOR_2H01G051800	HORVU_7552_2H01G053800	HORVU_8148_2H01G054200	HORVU_9043_2H01G056000	HORVU_IGRI_2H01G053900	HORVU_OUN333_2H01G051600	HORVU_PLANET_2H01G057500	HORVU_HUANG_2H01G046700	HORVU_CHIBA_2H01G051800	HORVU_FT11_Un01G002000	HORVU_OUH_2H01G050300
Rad5_16_3	117	.	T	C	.	.	.	GT	0	1	1	1	1	NA	1	1	1	1	1	1	1	1	1	1	1	1	1	1	1
Rad5_16_3	285	.	G	T	.	.	.	GT	0	0	1	1	1	NA	1	0	0	0	0	1	1	1	0	0	1	1	0	0	0
Rad5_16_3	318	.	C	T	.	.	.	GT	0	0	0	0	0	1	0	0	0	0	0	0	0	0	0	2	0	0	0	0	0
Rad5_16_3	356	.	T	C	.	.	.	GT	0	0	0	0	0	1	0	0	0	0	0	0	0	0	0	2	0	0	0	0	0
Rad5_16_3	507	.	T	C	.	.	.	GT	0	1	0	0	0	NA	0	0	0	0	0	0	0	0	0	1	0	0	1	1	1
Rad5_16_3	556	.	C	A	.	.	.	GT	0	1	0	0	0	NA	0	0	0	0	0	0	0	0	0	0	0	0	1	0	1
Rad5_16_3	651	.	G	T	.	.	.	GT	0	0	0	0	0	1	0	0	0	0	0	0	0	0	0	2	0	0	0	0	0
Rad5_16_3	656	.	G	T	.	.	.	GT	0	0	0	0	0	1	0	2	2	2	2	0	0	0	2	0	0	0	0	0	0
Rad5_16_3	660	.	T	C	.	.	.	GT	0	0	0	0	0	1	0	2	2	2	2	0	0	0	2	0	0	0	0	0	0
Rad5_16_3	695	.	C	A	.	.	.	GT	0	0	0	0	0	1	0	0	0	0	0	0	0	0	0	2	0	0	0	0	0
Rad5_16_3	729	.	C	A	.	.	.	GT	0	0	0	0	0	0	0	0	0	0	0	0	0	0	0	1	0	0	0	0	0
Rad5_16_3	759	.	G	T	.	.	.	GT	0	0	0	0	0	0	0	0	0	0	0	0	0	0	0	1	0	0	0	0	0
Rad5_16_3	787	.	C	T	.	.	.	GT	0	0	0	0	0	0	0	0	0	0	0	0	0	0	0	0	0	0	0	1	0
Rad5_16_3	798	.	C	T	.	.	.	GT	0	1	0	0	0	0	0	0	0	0	0	0	0	0	0	0	0	0	1	0	1
Rad5_16_3	1068	.	A	C	.	.	.	GT	0	1	1	1	1	0	1	1	1	1	1	1	1	1	1	1	1	1	1	1	1
Rad5_16_3	1242	.	G	A	.	.	.	GT	0	0	1	1	1	0	1	0	0	0	0	1	1	1	0	0	1	1	0	0	0
Rad5_16_3	1363	.	G	A	.	.	.	GT	0	0	0	0	0	0	0	0	0	0	0	0	0	0	0	1	0	0	0	0	0
Rad5_16_3	1404	.	G	A	.	.	.	GT	0	0	0	0	0	0	0	0	0	0	0	0	0	0	0	0	0	0	0	1	0
Rad5_16_3	1659	.	T	A	.	.	.	GT	0	0	0	0	0	0	0	0	0	0	0	0	0	0	0	0	0	0	0	1	0
Rad5_16_3	1685	.	C	T	.	.	.	GT	0	0	0	0	0	0	0	0	0	0	0	0	0	0	0	1	0	0	0	0	0
Rad5_16_3	2208	.	C	T	.	.	.	GT	0	0	0	0	0	0	0	0	0	0	0	0	0	0	0	0	0	0	0	1	0
Rad5_16_3	2472	.	T	C	.	.	.	GT	0	0	1	1	1	0	1	1	0	1	0	1	1	1	0	0	1	1	0	0	0
Rad5_16_3	2604	.	T	C	.	.	.	GT	0	0	1	1	1	0	1	0	0	0	0	1	1	1	0	0	1	1	0	0	0
Rad5_16_3	2670	.	T	G	.	.	.	GT	0	0	1	1	1	0	1	0	0	0	0	1	1	1	0	0	1	1	0	0	0
Rad5_16_3	2694	.	C	G	.	.	.	GT	0	0	1	1	1	0	1	1	0	1	0	1	1	1	0	0	1	1	0	0	0
Rad5_16_3	2737	.	G	C	.	.	.	GT	0	0	0	0	0	0	0	0	1	0	0	0	0	0	0	0	0	0	0	0	0
Rad5_16_3	2751	.	C	T	.	.	.	GT	0	0	1	1	1	0	1	1	0	1	0	1	1	1	0	0	1	1	1	0	0
Rad5_16_3	2754	.	G	A	.	.	.	GT	0	0	1	1	1	0	1	1	0	1	0	1	1	1	0	0	1	1	0	0	0
Rad5_16_3	2772	.	G	A	.	.	.	GT	0	0	1	1	1	0	1	0	0	0	0	1	1	1	0	0	1	1	0	0	0
Rad5_16_3	2884	.	G	A	.	.	.	GT	0	0	0	0	0	0	0	0	0	0	0	0	0	1	0	0	0	0	0	0	0
Rad5_16_3	2890	.	G	T	.	.	.	GT	0	0	0	0	0	0	0	0	1	0	1	0	0	0	1	0	0	0	0	0	0
Rad5_16_3	2924	.	C	T	.	.	.	GT	0	0	1	1	1	0	1	0	0	0	0	1	1	1	0	0	1	1	0	0	0
Rad5_16_3	2988	.	T	C	.	.	.	GT	0	0	0	0	0	0	0	0	1	0	0	0	0	0	0	0	0	0	0	0	0
Rad5_16_3	3054	.	C	T	.	.	.	GT	0	1	0	0	0	0	0	0	0	0	0	0	0	0	0	0	0	0	1	0	1
Rad5_16_3	3081	.	T	C	.	.	.	GT	0	1	1	1	1	0	1	1	1	1	1	1	1	1	1	1	1	1	1	1	1
#CHROM	POS	ID	REF (Morex)	ALT	QUAL	FILTER	INFO	FORMAT	Morex	Akashinriki	Barke	Golden_Promise	Hockett	HOR_10350	HOR_13821	HOR_13942	HOR_21599	HOR_3081	HOR_3365	HOR_7552	HOR_8148	HOR_9043	Igri	OUN333	RGT_Planet	ZDM01467	ZDM02064	B1K-04-12	OUH602
									HORVU.MOREX.r3.2HG0141740	HORVU_AKASHIN_2H01G297900	HORVU_BARKE_2H01G307300	HORVU_GOLDEN_2H01G270200	HORVU_HOCKETT_2H01G280700	HORVU_10350_2H01G306100	HORVU_13821_2H01G298100	HORVU_13942_2H01G296900	HORVU_21599_2H01G296200	HORVU_3081_2H01G298500	HORVU_HHOR_2H01G294000	HORVU_7552_2H01G299800	HORVU_8148_2H01G300100	HORVU_9043_2H01G301800	HORVU_IGRI_2H01G299200	HORVU_OUN333_2H01G293500	HORVU_PLANET_2H01G300200	HORVU_HUANG_2H01G291100	HORVU_CHIBA_2H01G297100	HORVU_FT11_2H01G299200	HORVU_OUH_2H01G290100
Rad5_16_4	39	.	C	T	.	.	.	GT	0	0	0	0	0	1	0	0	2	0	0	0	0	0	0	0	0	0	0	0	0
Rad5_16_4	177	.	G	A	.	.	.	GT	0	0	0	0	0	1	0	0	2	0	0	0	0	0	0	0	0	0	0	0	0
Rad5_16_4	239	.	G	C	.	.	.	GT	0	0	1	1	1	NA	1	1	0	1	1	0	1	0	1	0	1	0	0	0	0
Rad5_16_4	1314	.	C	T	.	.	.	GT	0	1	1	1	1	1	1	1	1	1	1	0	1	0	1	0	1	0	1	0	0
Rad5_16_4	1388	.	C	T	.	.	.	GT	0	0	0	0	0	0	0	0	1	0	0	0	0	0	0	0	0	0	0	0	0
Rad5_16_4	2355	.	G	A	.	.	.	GT	0	1	1	1	1	1	1	1	1	1	1	0	1	0	1	0	1	0	1	0	0
#CHROM	POS	ID	REF (Morex)	ALT	QUAL	FILTER	INFO	FORMAT	Morex	Akashinriki	Barke	Golden_Promise	Hockett	HOR_10350	HOR_13821	HOR_13942	HOR_21599	HOR_3081	HOR_3365	HOR_7552	HOR_8148	HOR_9043	Igri	OUN333	RGT_Planet	ZDM01467	ZDM02064	B1K-04-12	OUH602
									HORVU.MOREX.r3.3HG0293510	HORVU_AKASHIN_3H01G447500	HORVU_BARKE_3H01G449200	HORVU_GOLDEN_3H01G424400	HORVU_HOCKETT_3H01G435400	HORVU_10350_3H01G448800	HORVU_13821_3H01G443600	HORVU_13942_3H01G444600	HORVU_21599_3H01G450800	HORVU_3081_3H01G442700	HORVU_HHOR_3H01G443500	HORVU_7552_3H01G450500	HORVU_8148_3H01G449300	HORVU_9043_3H01G441000	HORVU_IGRI_3H01G443000	HORVU_OUN333_3H01G448400	HORVU_PLANET_3H01G453600	HORVU_HUANG_3H01G439400	HORVU_CHIBA_3H01G442300	HORVU_FT11_3H01G459100	HORVU_OUH_3H01G445900
Ris1_1	263	.	C	A	.	.	.	GT	0	0	0	0	0	0	0	0	0	0	0	0	0	0	0	0	0	1	0	0	0
Ris1_1	1137	.	C	T	.	.	.	GT	0	1	0	0	0	1	1	1	1	1	0	1	0	1	0	0	0	0	1	1	0
Ris1_1	1335	.	C	G	.	.	.	GT	0	1	0	0	0	1	1	1	1	1	0	1	0	1	0	0	0	0	1	1	0
Ris1_1	1379	.	C	T	.	.	.	GT	0	1	0	0	0	1	1	1	1	1	0	1	0	1	0	0	0	1	1	1	1
Ris1_1	1383	.	T	C	.	.	.	GT	0	1	0	0	0	1	1	1	1	1	0	1	0	1	0	0	0	0	1	1	0
Ris1_1	1793	.	T	A	.	.	.	GT	0	0	0	0	0	0	0	0	0	0	0	0	0	0	0	0	0	1	0	0	0
Ris1_1	2038	.	T	C	.	.	.	GT	0	1	0	0	0	1	1	1	1	1	0	1	0	1	0	0	0	0	1	1	0
Ris1_1	2208	.	T	G	.	.	.	GT	0	0	0	0	0	0	0	0	0	0	0	0	0	0	0	0	0	0	0	1	0
Ris1_1	2343	.	T	C	.	.	.	GT	0	1	0	0	0	0	0	0	0	0	0	0	0	0	0	0	0	0	1	0	0
Ris1_1	2400	.	A	G	.	.	.	GT	0	1	0	0	0	1	1	1	1	1	0	1	0	1	0	0	0	1	1	1	0
#CHROM	POS	ID	REF (Morex)	ALT	QUAL	FILTER	INFO	FORMAT	Morex	Akashinriki	Barke	Golden_Promise	Hockett	HOR_10350	HOR_13821	HOR_13942	HOR_21599	HOR_3081	HOR_3365	HOR_7552	HOR_8148	HOR_9043	Igri	OUN333	RGT_Planet	ZDM01467	ZDM02064	B1K-04-12	OUH602
									HORVU.MOREX.r3.2HG0199060	HORVU_AKASHIN_2H01G639000	HORVU_BARKE_2H01G650200	HORVU_GOLDEN_2H01G592900	HORVU_HOCKETT_2H01G608400	HORVU_10350_2H01G643800	HORVU_13821_2H01G636700	HORVU_13942_2H01G636200	HORVU_21599_2H01G636600	HORVU_3081_2H01G639800	HORVU_HHOR_2H01G632400	HORVU_7552_2H01G638400	HORVU_8148_2H01G636800	HORVU_9043_2H01G640400	HORVU_IGRI_2H01G638600	HORVU_OUN333_2H01G634300	HORVU_PLANET_2H01G640500	NA	HORVU_CHIBA_2H01G637000	HORVU_FT11_2H01G643000	HORVU_OUH_2H01G628800
Ris1_2	65	.	G	A	.	.	.	GT	0	1	1	1	0	0	1	1	1	1	1	1	1	0	1	0	1	NA	0	1	1
Ris1_2	114	.	A	T	.	.	.	GT	0	0	1	0	0	0	0	1	0	0	0	0	0	0	0	0	0	NA	0	1	0
Ris1_2	192	.	T	C	.	.	.	GT	0	0	1	0	0	0	0	1	0	0	0	0	0	0	0	0	0	NA	0	1	0
Ris1_2	205	.	A	T	.	.	.	GT	0	1	1	1	0	1	1	1	1	1	1	1	1	1	1	1	1	NA	1	1	1
Ris1_2	222	.	T	C	.	.	.	GT	0	0	1	0	0	0	0	1	0	0	0	0	0	0	0	0	0	NA	0	1	0
Ris1_2	383	.	T	C	.	.	.	GT	0	1	1	1	0	1	1	1	1	1	1	1	1	1	1	1	1	NA	1	1	1
Ris1_2	591	.	A	G	.	.	.	GT	0	0	0	0	0	0	1	0	0	1	1	0	1	0	0	0	0	NA	0	0	0
Ris1_2	598	.	C	T	.	.	.	GT	0	0	1	0	0	0	0	1	0	0	0	0	0	0	0	0	0	NA	0	1	0
Ris1_2	622	.	C	T	.	.	.	GT	0	0	1	0	0	0	0	1	0	0	0	0	0	0	0	0	0	NA	0	0	0
Ris1_2	628	.	T	G	.	.	.	GT	0	0	1	0	0	0	0	1	0	0	0	0	0	0	0	0	0	NA	0	1	0
Ris1_2	638	.	G	A	.	.	.	GT	0	0	0	0	0	0	0	0	0	0	0	0	0	1	0	1	0	NA	1	0	0
Ris1_2	639	.	C	A	.	.	.	GT	0	0	1	0	0	0	0	1	0	0	0	0	0	0	0	0	0	NA	0	1	0
Ris1_2	648	.	G	A	.	.	.	GT	0	0	1	0	0	0	0	1	0	0	0	0	0	0	0	0	0	NA	0	1	0
Ris1_2	660	.	A	G	.	.	.	GT	0	1	1	1	0	1	1	1	1	1	1	1	1	1	1	1	1	NA	1	1	1
Ris1_2	728	.	G	C	.	.	.	GT	0	0	0	0	0	0	0	0	0	0	0	0	0	0	0	0	0	NA	0	1	0
Ris1_2	801	.	A	G	.	.	.	GT	0	0	1	0	0	0	0	1	0	0	0	0	0	0	0	0	0	NA	0	0	0
Ris1_2	834	.	G	T	.	.	.	GT	0	0	0	0	0	0	0	0	0	0	0	0	0	0	0	0	0	NA	0	1	0
Ris1_2	975	.	C	T	.	.	.	GT	0	0	1	0	0	0	0	1	0	0	0	0	0	0	0	0	0	NA	0	0	0
Ris1_2	1057	.	T	C	.	.	.	GT	0	0	0	0	0	0	1	0	0	1	1	0	1	0	0	0	0	NA	0	0	0
Ris1_2	1072	.	A	G	.	.	.	GT	0	1	0	0	0	0	0	0	0	0	0	1	0	0	0	0	1	NA	0	0	0
Ris1_2	1076	.	A	G	.	.	.	GT	0	0	1	0	0	0	0	1	0	0	0	0	0	0	0	0	0	NA	0	1	0
Ris1_2	1077	.	T	A	.	.	.	GT	0	0	1	0	0	0	0	1	0	0	0	0	0	0	0	0	0	NA	0	1	0
Ris1_2	1081	.	G	A	.	.	.	GT	0	0	0	0	0	0	0	0	0	0	0	0	0	0	0	0	0	NA	1	0	0
Ris1_2	1088	.	A	C	.	.	.	GT	0	1	1	0	0	0	0	1	0	0	0	1	0	0	0	0	1	NA	0	1	0
Ris1_2	1125	.	T	G	.	.	.	GT	0	0	1	0	0	0	0	1	0	0	0	0	0	0	0	0	0	NA	0	1	0
Ris1_2	1154	.	G	C	.	.	.	GT	0	0	0	0	0	1	0	0	0	0	0	0	0	0	0	0	0	NA	0	0	0
Ris1_2	1185	.	G	A	.	.	.	GT	0	0	0	0	0	0	0	0	0	0	0	0	0	1	0	1	0	NA	1	0	0
Ris1_2	1209	.	T	C	.	.	.	GT	0	0	1	0	0	0	0	1	0	0	0	0	0	0	0	0	0	NA	0	1	0
Ris1_2	1317	.	T	C	.	.	.	GT	0	0	1	0	0	0	0	1	0	0	0	0	0	0	0	0	0	NA	0	0	0
Ris1_2	1320	.	G	C	.	.	.	GT	0	0	1	0	0	0	0	1	0	0	0	0	0	0	0	0	0	NA	0	1	0
Ris1_2	1329	.	T	C	.	.	.	GT	0	0	1	0	0	0	0	1	0	0	0	0	0	0	0	0	0	NA	0	0	0
Ris1_2	1389	.	C	T	.	.	.	GT	0	0	0	0	0	0	0	0	0	0	0	0	0	1	0	1	0	NA	1	0	0
Ris1_2	1494	.	C	T	.	.	.	GT	0	0	1	0	0	0	0	1	0	0	0	0	0	0	0	0	0	NA	0	0	0
Ris1_2	1878	.	G	T	.	.	.	GT	0	0	1	0	0	0	0	1	0	0	0	0	0	0	0	0	0	NA	0	0	0
Ris1_2	2184	.	G	T	.	.	.	GT	0	0	0	0	0	0	0	0	0	0	0	0	0	0	0	0	0	NA	0	0	1
Ris1_2	2232	.	G	T	.	.	.	GT	0	0	1	0	0	0	0	1	0	0	0	0	0	0	0	0	0	NA	0	1	1
Ris1_2	2247	.	A	T	.	.	.	GT	0	0	0	0	0	0	0	0	0	0	0	0	0	0	0	0	0	NA	0	1	0
Ris1_2	2332	.	T	C	.	.	.	GT	0	0	0	0	0	1	0	0	0	0	0	0	0	0	0	0	0	NA	0	0	0
Ris1_2	2395	.	T	A	.	.	.	GT	0	0	0	0	0	0	0	0	0	0	0	0	0	0	0	0	0	NA	0	1	0
Ris1_2	2405	.	T	C	.	.	.	GT	1	0	0	0	1	0	0	0	0	0	0	0	0	0	0	0	0	NA	0	2	0
Ris1_2	2418	.	A	T	.	.	.	GT	0	0	1	0	0	0	0	1	0	0	0	0	0	0	0	0	0	NA	0	NA	NA
Ris1_2	2433	.	T	C	.	.	.	GT	0	0	0	0	0	0	0	0	0	0	0	0	0	0	0	0	0	NA	0	0	1
Ris1_2	2439	.	A	T	.	.	.	GT	0	0	0	0	0	0	0	0	0	0	0	0	0	0	0	0	0	NA	0	0	1
Ris1_2	2447	.	C	T,G	.	.	.	GT	0	0	0	0	0	0	0	0	0	0	0	0	0	1	0	1	0	NA	1	0	1
Ris1_2	2448	.	A	T	.	.	.	GT	0	0	1	0	0	0	0	1	0	0	0	0	0	0	0	0	0	NA	0	NA	0
Ris1_2	2454	.	C	T	.	.	.	GT	0	0	1	0	0	0	0	1	0	0	0	0	0	0	0	0	0	NA	0	NA	NA
Ris1_2	2484	.	T	C	.	.	.	GT	0	0	0	0	0	0	0	0	0	0	0	0	0	0	0	0	0	NA	0	1	0
Ris1_2	2498	.	C	T	.	.	.	GT	0	0	0	0	0	0	0	0	0	0	0	0	0	0	0	0	0	NA	0	1	0
Ris1_2	2514	.	A	T	.	.	.	GT	0	0	0	0	0	0	0	0	0	0	0	0	0	0	0	0	0	NA	0	1	0
Ris1_2	2540	.	C	T	.	.	.	GT	0	0	0	0	0	0	0	0	0	0	0	0	0	0	0	0	0	NA	0	1	0
Ris1_2	2541	.	A	G	.	.	.	GT	0	0	0	0	0	0	0	0	0	0	0	0	0	0	0	0	0	NA	0	1	0
Ris1_2	2543	.	C	T	.	.	.	GT	0	0	0	0	0	0	0	0	0	0	0	0	0	0	0	0	0	NA	0	1	0
Ris1_2	2548	.	G	T	.	.	.	GT	0	0	0	0	0	1	0	0	0	0	0	0	0	0	0	0	0	NA	0	0	0
Ris1_2	2569	.	T	G	.	.	.	GT	0	0	1	0	0	0	0	1	0	0	0	0	0	0	0	0	0	NA	0	0	NA
Ris1_2	2787	.	C	G	.	.	.	GT	0	0	1	0	0	0	0	1	0	0	0	0	0	0	0	0	0	NA	0	0	0
Ris1_2	3147	.	G	T	.	.	.	GT	0	0	0	0	0	0	0	0	0	0	0	0	0	1	0	1	0	NA	1	0	0
#CHROM	POS	ID	REF (Morex)	ALT	QUAL	FILTER	INFO	FORMAT	Morex	Akashinriki	Barke	Golden_Promise	Hockett	HOR_10350	HOR_13821	HOR_13942	HOR_21599	HOR_3081	HOR_3365	HOR_7552	HOR_8148	HOR_9043	Igri	OUN333	RGT_Planet	ZDM01467	ZDM02064	B1K-04-12	OUH602
									HORVU.MOREX.r3.7HG0696030	HORVU_AKASHIN_7H01G359500	HORVU_BARKE_7H01G375500	HORVU_GOLDEN_7H01G339000	HORVU_HOCKETT_7H01G355000	HORVU_10350_7H01G374900	HORVU_13821_7H01G361400	HORVU_13942_7H01G359600	HORVU_21599_7H01G365200	HORVU_3081_7H01G369500	HORVU_HHOR_7H01G363200	HORVU_7552_7H01G364100	HORVU_8148_7H01G363500	HORVU_9043_7H01G368400	HORVU_IGRI_7H01G363600	HORVU_OUN333_7H01G371200	HORVU_PLANET_7H01G372500	HORVU_HUANG_7H01G348500	HORVU_CHIBA_7H01G358800	HORVU_FT11_7H01G364600	HORVU_OUH_7H01G347000
Ris1_3	156	.	C	T	.	.	.	GT	0	0	1	1	0	0	1	0	0	0	0	0	1	0	1	0	1	1	1	0	0
Ris1_3	362	.	T	C	.	.	.	GT	0	0	0	0	0	0	0	0	0	0	0	1	0	0	0	0	0	0	0	0	0
Ris1_3	1056	.	G	A	.	.	.	GT	0	0	0	0	0	0	0	0	0	0	0	0	0	0	0	0	0	0	0	0	1
Ris1_3	1328	.	T	C	.	.	.	GT	0	0	1	1	0	1	1	0	1	0	0	1	1	1	1	0	1	1	1	1	1
Ris1_3	1593	.	A	G	.	.	.	GT	0	0	0	0	0	0	1	0	0	0	0	0	0	0	0	0	0	0	0	0	0
#CHROM	POS	ID	REF (Morex)	ALT	QUAL	FILTER	INFO	FORMAT	Morex	Akashinriki	Barke	Golden_Promise	Hockett	HOR_10350	HOR_13821	HOR_13942	HOR_21599	HOR_3081	HOR_3365	HOR_7552	HOR_8148	HOR_9043	Igri	OUN333	RGT_Planet	ZDM01467	ZDM02064	B1K-04-12	OUH602
									HORVU.MOREX.r3.3HG0320710	HORVU_AKASHIN_3H01G635400	HORVU_BARKE_3H01G643800	HORVU_GOLDEN_3H01G600300	HORVU_HOCKETT_3H01G626100	HORVU_10350_3H01G642000	HORVU_13821_3H01G623700	HORVU_13942_3H01G634700	HORVU_21599_3H01G642500	HORVU_3081_3H01G635200	HORVU_HHOR_3H01G627100	HORVU_7552_3H01G645500	HORVU_8148_3H01G640800	HORVU_9043_3H01G635000	HORVU_IGRI_3H01G634900	HORVU_OUN333_3H01G640100	HORVU_PLANET_3H01G647600	HORVU_HUANG_3H01G624500	HORVU_CHIBA_3H01G627500	HORVU_FT11_3H01G652100	HORVU_OUH_3H01G630700
SHPRH	18	.	T	C	.	.	.	GT	0	0	0	0	0	0	0	0	0	0	0	0	0	0	1	0	0	0	0	0	1
SHPRH	81	.	C	G	.	.	.	GT	0	0	0	0	0	0	0	0	0	0	0	0	0	0	0	0	0	0	0	1	0
SHPRH	90	.	G	T	.	.	.	GT	0	0	0	0	0	0	0	0	0	0	0	0	0	0	1	0	0	0	0	0	0
SHPRH	120	.	C	T	.	.	.	GT	0	1	0	0	0	0	0	0	0	0	0	1	0	0	0	0	0	0	0	1	0
SHPRH	122	.	C	A	.	.	.	GT	0	0	0	0	0	1	0	0	0	0	0	0	0	0	0	0	0	0	0	0	0
SHPRH	161	.	A	G	.	.	.	GT	0	0	0	0	0	0	0	0	0	1	0	0	1	0	0	0	0	0	0	0	0
SHPRH	166	.	A	G	.	.	.	GT	0	1	0	0	0	1	0	1	1	1	0	1	1	0	1	1	0	1	1	1	1
SHPRH	189	.	C	T	.	.	.	GT	0	0	0	0	0	0	0	1	1	1	0	0	1	0	1	0	0	1	0	0	0
SHPRH	228	.	G	C	.	.	.	GT	0	1	0	0	0	1	0	0	0	0	0	1	0	0	0	0	0	1	1	1	0
SHPRH	285	.	G	T	.	.	.	GT	0	0	0	0	0	0	0	0	0	0	0	0	0	0	1	0	0	0	0	0	0
SHPRH	291	.	C	A	.	.	.	GT	0	0	0	0	0	1	0	0	0	1	0	0	1	0	0	0	0	0	0	0	0
SHPRH	303	.	C	G	.	.	.	GT	0	0	0	0	0	0	0	1	1	0	0	0	0	0	1	0	0	0	0	0	0
SHPRH	310	.	A	T	.	.	.	GT	0	0	0	0	0	0	0	1	1	0	0	0	0	0	1	0	0	0	0	0	0
SHPRH	312	.	G	C	.	.	.	GT	0	0	0	0	0	0	0	1	1	0	0	0	0	0	1	0	0	0	0	0	0
SHPRH	313	.	C	A	.	.	.	GT	0	0	0	0	0	0	0	1	1	0	0	0	0	0	1	0	0	0	0	0	0
SHPRH	317	.	A	G,C	.	.	.	GT	0	1	0	0	0	1	0	1	1	1	0	1	1	0	1	1	0	1	1	1	1
SHPRH	318	.	C	G	.	.	.	GT	0	0	0	0	0	0	0	1	1	0	0	0	0	0	1	0	0	0	0	0	0
SHPRH	384	.	C	G	.	.	.	GT	0	1	0	0	0	1	0	0	0	0	0	1	0	0	0	0	0	0	1	0	1
SHPRH	582	.	G	A	.	.	.	GT	0	0	0	0	0	0	0	0	0	0	0	0	0	0	0	0	0	0	0	0	1
SHPRH	588	.	G	C	.	.	.	GT	0	1	0	0	0	1	0	1	1	1	0	1	1	0	1	0	0	1	1	1	1
SHPRH	728	.	G	A	.	.	.	GT	0	1	0	0	0	1	0	1	1	1	0	1	1	0	1	0	0	1	1	1	1
SHPRH	740	.	C	T	.	.	.	GT	0	1	0	0	0	1	0	1	1	1	0	1	1	0	1	0	0	1	1	1	1
SHPRH	792	.	A	G	.	.	.	GT	0	0	0	0	0	0	0	1	1	0	0	0	0	0	0	0	0	0	0	0	0
SHPRH	827	.	A	G	.	.	.	GT	0	0	0	0	0	0	0	0	0	0	0	0	0	0	0	0	0	0	0	0	1
SHPRH	855	.	G	T	.	.	.	GT	0	0	0	0	0	1	0	0	0	0	0	0	0	0	0	0	0	0	0	0	0
SHPRH	912	.	G	A	.	.	.	GT	0	0	0	0	0	0	0	0	0	0	0	0	0	0	1	0	0	0	0	0	0
SHPRH	981	.	C	T,G	.	.	.	GT	0	1	0	0	0	0	0	0	0	0	0	1	0	0	0	0	0	0	1	0	1
SHPRH	1029	.	T	C	.	.	.	GT	0	0	0	0	0	1	0	0	0	0	0	0	0	0	0	0	0	0	0	0	0
SHPRH	1088	.	C	T	.	.	.	GT	0	0	0	0	0	0	0	1	1	0	0	0	0	0	0	0	0	0	0	0	0
SHPRH	1145	.	A	G	.	.	.	GT	0	0	0	0	0	0	0	0	0	0	0	0	0	0	0	0	0	0	0	0	1
SHPRH	1146	.	A	G	.	.	.	GT	0	0	0	0	0	0	0	1	1	0	0	0	0	0	0	0	0	0	0	0	0
SHPRH	1174	.	G	A	.	.	.	GT	0	1	0	0	0	1	0	1	1	1	0	1	1	0	1	0	0	1	1	1	1
SHPRH	1255	.	G	C	.	.	.	GT	0	1	0	0	0	1	0	1	1	1	0	1	1	0	1	0	0	1	1	1	1
SHPRH	1311	.	G	A	.	.	.	GT	0	0	0	0	0	0	0	0	0	0	0	0	0	0	0	0	0	1	0	0	0
SHPRH	1384	.	C	T	.	.	.	GT	0	0	0	0	0	0	0	0	0	0	0	0	0	0	1	0	0	0	0	0	0
SHPRH	1412	.	A	T	.	.	.	GT	0	0	0	0	0	0	0	0	0	0	0	0	0	0	0	0	0	0	0	0	1
SHPRH	1630	.	A	G	.	.	.	GT	0	1	0	0	0	0	0	0	0	0	0	1	0	0	0	0	0	0	1	0	0
SHPRH	1693	.	T	C	.	.	.	GT	0	0	0	0	0	0	0	0	0	0	0	0	0	0	1	0	0	0	0	0	0
SHPRH	1704	.	C	T	.	.	.	GT	0	0	0	0	0	0	0	0	0	0	0	0	0	0	0	1	0	0	0	0	0
SHPRH	1759	.	C	A	.	.	.	GT	0	1	0	0	0	1	0	1	1	0	0	1	0	0	1	1	0	1	1	0	1
SHPRH	1785	.	C	T	.	.	.	GT	0	0	0	0	0	1	0	0	0	0	0	0	0	0	0	0	0	0	0	0	0
SHPRH	1833	.	C	G	.	.	.	GT	0	1	0	0	0	0	0	0	0	0	0	1	0	0	0	0	0	0	1	0	0
SHPRH	1899	.	C	T	.	.	.	GT	0	0	0	0	0	0	0	0	0	0	0	0	0	0	0	1	0	0	0	0	0
SHPRH	2241	.	C	T	.	.	.	GT	0	0	0	0	0	0	0	0	0	0	0	0	0	0	0	0	0	0	0	1	0
SHPRH	2899	.	T	A	.	.	.	GT	0	0	0	0	0	0	0	0	0	0	0	0	0	0	0	0	0	1	0	0	0
SHPRH	2926	.	G	T	.	.	.	GT	0	0	0	0	0	0	0	0	0	0	0	0	0	0	0	1	0	0	0	0	0
SHPRH	2995	.	C	T	.	.	.	GT	0	0	0	0	0	0	0	0	0	0	0	0	0	0	0	1	0	0	0	0	0
SHPRH	3195	.	A	C	.	.	.	GT	0	1	0	0	0	1	0	1	1	1	0	1	1	0	1	1	0	1	1	1	1
SHPRH	3220	.	G	A	.	.	.	GT	0	0	0	0	0	0	0	0	0	0	0	0	0	0	1	0	0	0	0	0	0
SHPRH	3233	.	G	A	.	.	.	GT	0	0	0	0	0	0	0	0	0	0	0	0	0	0	0	0	0	1	0	0	0
SHPRH	3262	.	A	C	.	.	.	GT	0	0	0	0	0	0	0	0	0	0	0	0	0	0	0	0	0	0	0	0	1
SHPRH	3305	.	C	T	.	.	.	GT	0	0	0	0	0	1	0	0	0	0	0	0	0	0	0	0	0	0	0	0	0
SHPRH	3343	.	C	T	.	.	.	GT	0	0	0	0	0	0	0	1	1	0	0	0	0	0	0	0	0	0	0	0	0
SHPRH	3468	.	C	A	.	.	.	GT	0	0	0	0	0	0	0	0	0	1	0	0	1	0	0	0	0	0	0	0	0
SHPRH	3694	.	G	A	.	.	.	GT	0	0	0	0	0	0	0	0	0	0	0	0	0	0	0	0	1	0	0	0	0
SHPRH	3729	.	C	G	.	.	.	GT	0	0	0	0	0	0	0	1	1	0	0	0	0	0	0	0	0	0	0	0	0
SHPRH	3774	.	T	C	.	.	.	GT	0	0	0	0	0	0	0	0	0	0	0	0	0	0	0	0	0	1	0	0	0
SHPRH	3786	.	T	A	.	.	.	GT	0	1	0	0	0	0	0	0	0	0	0	1	0	0	0	0	0	0	0	0	0
SHPRH	3808	.	G	A	.	.	.	GT	0	0	0	0	0	0	0	0	0	0	0	0	0	0	0	1	0	0	0	0	0
SHPRH	3816	.	T	C	.	.	.	GT	0	0	0	0	0	1	0	0	0	0	0	0	0	0	0	0	0	0	0	0	0
SHPRH	3837	.	A	G	.	.	.	GT	0	0	0	0	0	0	0	0	0	0	0	0	0	0	0	1	0	0	1	0	0
SHPRH	3876	.	G	A	.	.	.	GT	0	0	0	0	0	0	0	0	0	0	0	0	0	0	0	0	0	0	0	0	1
#CHROM	POS	ID	REF (Morex)	ALT	QUAL	FILTER	INFO	FORMAT	Morex	Akashinriki	Barke	Golden_Promise	Hockett	HOR_10350	HOR_13821	HOR_13942	HOR_21599	HOR_3081	HOR_3365	HOR_7552	HOR_8148	HOR_9043	Igri	OUN333	RGT_Planet	ZDM01467	ZDM02064	B1K-04-12	OUH602
									HORVU.MOREX.r3.1HG0094930	HORVU_AKASHIN_1H01G589400	HORVU_BARKE_1H01G612100	HORVU_GOLDEN_1H01G535900	HORVU_HOCKETT_1H01G372800	HORVU_10350_1H01G603800	HORVU_13821_1H01G589600	HORVU_13942_1H01G581700	HORVU_21599_1H01G585700	HORVU_3081_1H01G593200	HORVU_HHOR_1H01G588900	HORVU_7552_1H01G590300	HORVU_8148_1H01G589100	HORVU_9043_1H01G589500	HORVU_IGRI_1H01G587500	HORVU_OUN333_1H01G587600	HORVU_PLANET_1H01G596500	HORVU_HUANG_1H01G570700	HORVU_CHIBA_1H01G574400	HORVU_FT11_1H01G602900	HORVU_OUH_1H01G570000
Mot1	77	.	C	T	.	.	.	GT	0	1	1	1	0	1	1	0	0	1	1	1	1	0	1	1	0	1	1	1	1
Mot1	262	.	G	A	.	.	.	GT	0	0	1	1	0	0	0	0	0	1	0	0	0	0	1	0	0	1	0	0	0
Mot1	453	.	C	G	.	.	.	GT	0	0	0	0	0	1	1	0	0	0	1	1	0	0	0	1	0	0	0	0	0
Mot1	606	.	T	C	.	.	.	GT	0	1	0	0	0	0	0	0	0	0	0	0	0	0	0	0	0	0	1	1	1
Mot1	775	.	G	A	.	.	.	GT	0	1	1	1	0	1	1	0	0	1	1	1	1	0	1	1	0	1	1	1	1
Mot1	789	.	G	C	.	.	.	GT	0	1	1	1	0	1	1	0	0	1	1	1	1	0	1	1	0	1	1	1	1
Mot1	1341	.	T	C	.	.	.	GT	0	1	0	0	0	0	0	0	0	0	0	0	0	0	0	0	0	0	1	1	1
Mot1	1434	.	T	A	.	.	.	GT	0	1	0	0	0	0	0	0	0	0	0	0	0	0	0	0	0	0	1	1	1
Mot1	1483	.	G	A	.	.	.	GT	0	1	0	0	0	0	0	0	0	0	0	0	0	0	0	0	0	0	1	1	1
Mot1	1506	.	G	A	.	.	.	GT	0	1	0	0	0	0	0	0	0	0	0	0	0	0	0	0	0	0	1	1	1
Mot1	1519	.	C	T	.	.	.	GT	0	1	0	0	0	0	0	0	0	0	0	0	0	0	0	0	0	0	1	1	1
Mot1	1734	.	G	A	.	.	.	GT	0	0	1	1	0	0	0	0	0	1	0	0	0	0	1	0	0	1	0	0	0
Mot1	2168	.	A	G	.	.	.	GT	0	0	0	0	0	0	0	0	1	0	0	0	0	0	0	0	0	0	0	0	0
Mot1	3972	.	C	G	.	.	.	GT	0	0	1	1	0	0	0	0	0	0	0	0	0	0	0	0	0	0	0	0	0
Mot1	4653	.	C	T	.	.	.	GT	0	0	0	0	0	1	1	0	0	0	1	1	0	0	0	1	0	0	0	0	0
Mot1	5595	.	T	C	.	.	.	GT	0	1	0	0	0	0	0	0	0	0	0	0	0	0	0	0	0	0	1	1	1
Mot1	6138	.	C	T	.	.	.	GT	0	1	0	0	0	0	0	0	0	0	0	0	0	0	0	0	0	0	1	1	1
#CHROM	POS	ID	REF (Morex)	ALT	QUAL	FILTER	INFO	FORMAT	Morex	Akashinriki	Barke	Golden_Promise	Hockett	HOR_10350	HOR_13821	HOR_13942	HOR_21599	HOR_3081	HOR_3365	HOR_7552	HOR_8148	HOR_9043	Igri	OUN333	RGT_Planet	ZDM01467	ZDM02064	B1K-04-12	OUH602
									HORVU.MOREX.r3.3HG0231890	HORVU_AKASHIN_3H01G085700	HORVU_BARKE_3H01G090600	HORVU_GOLDEN_3H01G077400	HORVU_HOCKETT_3H01G080500	HORVU_10350_3H01G085100	HORVU_13821_3H01G086200	HORVU_13942_3H01G086600	HORVU_21599_3H01G087700	HORVU_3081_3H01G082900	HORVU_HHOR_3H01G086100	HORVU_7552_3H01G087600	HORVU_8148_3H01G089100	HORVU_9043_3H01G081400	HORVU_IGRI_3H01G082900	HORVU_OUN333_3H01G087700	HORVU_PLANET_3H01G090900	HORVU_HUANG_3H01G079500	HORVU_CHIBA_3H01G084600	HORVU_FT11_3H01G090900	HORVU_OUH_3H01G085400
ERCC6_1	12	.	G	C	.	.	.	GT	0	0	0	0	0	0	0	0	0	0	0	0	0	0	0	0	0	0	0	0	1
ERCC6_1	61	.	A	G	.	.	.	GT	0	0	1	1	1	0	1	0	0	0	0	0	1	0	1	0	0	0	0	0	0
ERCC6_1	127	.	A	G	.	.	.	GT	0	0	0	0	0	0	0	1	0	1	1	0	0	0	0	0	0	0	0	1	0
ERCC6_1	147	.	C	T	.	.	.	GT	0	0	0	0	0	0	0	0	0	0	0	0	0	0	0	0	0	0	0	1	0
ERCC6_1	161	.	G	C	.	.	.	GT	0	0	0	0	0	0	0	0	0	0	0	0	0	0	0	0	0	0	0	1	1
ERCC6_1	166	.	C	T	.	.	.	GT	0	0	0	0	0	0	0	1	0	1	1	0	0	0	0	0	0	0	0	0	0
ERCC6_1	183	.	C	T	.	.	.	GT	0	0	0	0	0	0	0	1	0	1	1	0	0	0	0	0	0	0	0	1	0
ERCC6_1	234	.	C	A	.	.	.	GT	0	0	0	0	0	1	0	0	0	0	0	0	0	1	0	0	0	0	0	1	0
ERCC6_1	243	.	G	C	.	.	.	GT	0	0	0	0	0	0	0	0	0	0	0	0	0	0	0	0	0	0	0	1	0
ERCC6_1	249	.	A	C	.	.	.	GT	0	0	0	0	0	1	0	0	0	0	0	0	0	1	0	0	0	0	0	1	0
ERCC6_1	276	.	T	C	.	.	.	GT	0	0	0	0	0	0	0	0	0	0	0	0	0	0	0	0	0	0	0	0	1
ERCC6_1	279	.	A	G	.	.	.	GT	0	0	0	0	0	0	0	0	0	0	0	0	0	0	0	0	0	0	0	0	1
ERCC6_1	290	.	G	A	.	.	.	GT	0	0	0	0	0	0	0	0	0	0	0	0	0	0	0	0	0	0	0	1	0
ERCC6_1	297	.	A	C	.	.	.	GT	0	0	1	1	1	1	1	1	1	1	1	0	1	1	1	0	0	0	0	1	1
ERCC6_1	310	.	G	A	.	.	.	GT	0	0	0	0	0	0	0	0	0	0	0	0	0	0	0	0	0	0	0	1	0
ERCC6_1	311	.	C	T	.	.	.	GT	0	0	0	0	0	0	0	0	0	0	0	0	0	0	0	0	0	0	0	1	0
ERCC6_1	369	.	T	C	.	.	.	GT	0	0	1	1	1	0	1	0	1	0	0	0	1	0	1	0	0	0	0	1	1
ERCC6_1	386	.	G	A	.	.	.	GT	0	0	0	0	0	0	0	1	0	1	1	0	0	0	0	0	0	0	0	0	0
ERCC6_1	396	.	C	T	.	.	.	GT	0	0	1	1	1	0	1	0	1	0	0	0	1	0	1	0	0	0	0	1	1
ERCC6_1	461	.	G	A	.	.	.	GT	0	0	0	0	0	0	0	1	0	1	1	0	0	0	0	0	0	0	0	0	0
ERCC6_1	477	.	C	G	.	.	.	GT	0	0	0	0	0	0	0	1	0	1	1	0	0	0	0	0	0	0	0	0	0
ERCC6_1	492	.	T	C	.	.	.	GT	0	0	0	0	0	0	0	1	0	1	1	0	0	0	0	0	0	0	0	0	0
ERCC6_1	495	.	A	G,C	.	.	.	GT	0	0	0	0	0	0	0	1	0	1	1	0	0	0	0	0	0	0	0	1	0
ERCC6_1	496	.	T	C	.	.	.	GT	0	0	0	0	0	1	0	0	0	0	0	0	0	1	0	0	0	0	0	0	0
ERCC6_1	540	.	C	T	.	.	.	GT	0	0	1	1	1	0	1	0	1	0	0	0	1	0	1	0	0	0	0	1	1
ERCC6_1	633	.	C	T	.	.	.	GT	0	0	0	0	0	0	0	1	0	1	1	0	0	0	0	0	0	0	0	1	0
ERCC6_1	645	.	T	C	.	.	.	GT	0	0	1	1	1	0	1	1	1	1	1	0	1	0	1	0	0	0	0	1	1
ERCC6_1	761	.	A	G	.	.	.	GT	0	0	1	1	1	0	1	1	1	1	1	0	1	0	1	0	0	0	0	1	1
ERCC6_1	797	.	A	T	.	.	.	GT	0	0	0	0	0	0	0	1	0	1	1	0	0	0	0	0	0	0	0	0	0
ERCC6_1	897	.	G	A	.	.	.	GT	0	0	0	0	0	0	0	1	0	1	1	0	0	0	0	0	0	0	0	0	1
ERCC6_1	933	.	G	A	.	.	.	GT	0	0	0	0	0	1	0	0	0	0	0	0	0	1	0	0	0	0	0	0	0
ERCC6_1	1050	.	T	A	.	.	.	GT	0	0	1	1	1	0	1	1	1	1	1	0	1	0	1	0	0	0	0	1	1
ERCC6_1	1118	.	T	C	.	.	.	GT	0	0	1	1	1	0	1	1	1	1	1	0	1	0	1	0	0	0	0	1	1
ERCC6_1	1151	.	A	G	.	.	.	GT	0	0	0	0	0	0	0	0	0	0	0	0	0	0	0	0	0	0	0	1	0
ERCC6_1	1209	.	C	A	.	.	.	GT	0	0	1	1	1	0	1	1	1	1	1	0	1	0	1	0	0	0	0	1	1
ERCC6_1	1299	.	T	C	.	.	.	GT	0	0	0	0	0	0	0	1	0	1	1	0	0	0	0	0	0	0	0	0	0
ERCC6_1	1323	.	G	A	.	.	.	GT	0	0	0	0	0	0	0	0	0	0	0	0	0	0	0	0	0	0	0	1	0
ERCC6_1	1431	.	A	G	.	.	.	GT	0	0	0	0	0	0	0	0	0	0	0	0	0	0	0	0	0	0	0	1	0
ERCC6_1	1440	.	G	A	.	.	.	GT	0	0	1	1	1	1	1	1	1	1	1	0	1	1	1	0	0	0	0	1	1
ERCC6_1	1559	.	T	G	.	.	.	GT	0	0	0	0	0	0	0	0	0	0	0	0	0	0	0	0	0	0	0	1	0
ERCC6_1	1833	.	C	T	.	.	.	GT	0	0	0	0	0	0	0	0	0	0	0	0	0	0	0	0	0	0	0	1	0
ERCC6_1	1857	.	C	A	.	.	.	GT	0	0	1	1	1	0	1	0	1	0	0	0	1	0	1	0	0	0	0	0	0
ERCC6_1	1899	.	C	T	.	.	.	GT	0	0	0	0	0	0	0	0	0	0	0	0	0	0	0	0	0	0	0	1	0
ERCC6_1	1960	.	T	C	.	.	.	GT	0	0	1	1	1	0	1	0	1	0	0	0	1	0	1	0	0	0	0	1	0
ERCC6_1	2103	.	A	T	.	.	.	GT	0	0	0	0	0	0	0	0	0	0	0	0	0	0	0	0	0	0	0	1	0
ERCC6_1	2158	.	C	T	.	.	.	GT	0	0	0	0	0	0	0	0	0	0	0	0	0	0	0	0	0	0	0	0	1
ERCC6_1	2172	.	C	T	.	.	.	GT	0	0	1	1	1	0	1	0	1	0	0	0	1	0	1	0	0	0	0	1	0
ERCC6_1	2220	.	T	C	.	.	.	GT	0	0	1	1	1	0	1	0	1	0	0	0	1	0	1	0	0	0	0	1	0
ERCC6_1	2266	.	G	A	.	.	.	GT	0	0	1	1	1	0	1	0	1	0	0	0	1	0	1	0	0	0	0	0	0
ERCC6_1	2271	.	A	T	.	.	.	GT	0	0	1	1	1	0	1	0	1	0	0	0	1	0	1	0	0	0	0	1	0
ERCC6_1	2274	.	A	G	.	.	.	GT	0	0	0	0	0	0	0	0	0	0	0	0	0	0	0	0	0	0	0	1	0
ERCC6_1	2354	.	T	C	.	.	.	GT	0	0	1	1	1	0	1	1	1	1	1	0	1	0	1	0	0	0	0	1	1
ERCC6_1	2358	.	C	T	.	.	.	GT	0	0	1	1	1	0	1	0	1	0	0	0	1	0	1	0	0	0	0	1	0
ERCC6_1	2478	.	T	C	.	.	.	GT	0	0	1	1	1	0	1	0	1	0	0	0	1	0	1	0	0	0	0	1	0
ERCC6_1	2611	.	T	C	.	.	.	GT	0	0	0	0	0	1	0	0	0	0	0	0	0	1	0	0	0	0	0	0	0
ERCC6_1	2670	.	C	T	.	.	.	GT	0	0	0	0	0	0	0	1	0	1	1	0	0	0	0	0	0	0	0	0	1
ERCC6_1	2821	.	G	A	.	.	.	GT	0	0	0	0	0	0	0	0	0	0	0	0	0	0	0	0	0	0	0	1	0
ERCC6_1	2853	.	C	A	.	.	.	GT	0	0	1	1	1	0	1	0	1	0	0	0	1	0	1	0	0	0	0	1	0
ERCC6_1	2855	.	C	G	.	.	.	GT	0	0	1	1	1	0	1	0	1	0	0	0	1	0	1	0	0	0	0	0	0
ERCC6_1	2893	.	G	T	.	.	.	GT	0	0	0	0	0	0	0	0	0	0	0	0	0	0	0	0	0	0	0	1	0
ERCC6_1	2895	.	T	C	.	.	.	GT	0	0	1	1	1	0	1	0	1	0	0	0	1	0	1	0	0	0	0	1	0
ERCC6_1	2972	.	C	T	.	.	.	GT	0	0	0	0	0	1	0	0	0	0	0	0	0	1	0	0	0	0	0	0	0
ERCC6_1	3015	.	C	T	.	.	.	GT	0	0	0	0	0	0	0	0	0	0	0	0	0	0	0	0	0	0	0	1	0
ERCC6_1	3165	.	T	C	.	.	.	GT	0	0	1	1	1	0	1	0	1	0	0	0	1	0	1	0	0	0	0	1	0
ERCC6_1	3225	.	A	G	.	.	.	GT	0	0	1	1	1	0	1	0	1	0	0	0	1	0	1	0	0	0	0	1	0
ERCC6_1	3231	.	G	A	.	.	.	GT	0	0	1	1	1	0	1	0	1	0	0	0	1	0	1	0	0	0	0	1	0
ERCC6_1	3243	.	T	A	.	.	.	GT	0	0	1	1	1	0	1	0	1	0	0	0	1	0	1	0	0	0	0	1	0
ERCC6_1	3261	.	A	C	.	.	.	GT	0	0	0	0	0	0	0	0	0	0	0	0	0	0	0	0	0	0	0	1	0
ERCC6_1	3262	.	A	G	.	.	.	GT	0	0	0	0	0	0	0	0	1	0	0	0	0	0	0	0	0	0	0	0	0
ERCC6_1	3303	.	T	C	.	.	.	GT	0	0	0	0	0	0	0	0	1	0	0	0	0	0	0	0	0	0	0	0	0
ERCC6_1	3306	.	C	T	.	.	.	GT	0	0	0	0	0	0	0	0	0	0	0	0	0	0	0	0	0	0	0	1	0
ERCC6_1	3354	.	T	C	.	.	.	GT	0	0	1	1	1	0	1	0	1	0	0	0	1	0	1	0	0	0	0	0	0
ERCC6_1	3375	.	T	C	.	.	.	GT	0	0	1	1	1	0	1	0	1	0	0	0	1	0	1	0	0	0	0	1	0
ERCC6_1	3384	.	C	T	.	.	.	GT	0	0	0	0	0	0	0	0	0	0	0	0	0	0	0	0	0	0	0	1	0
ERCC6_1	3385	.	T	G	.	.	.	GT	0	0	1	1	1	0	1	0	1	0	0	0	1	0	1	0	0	0	0	1	0
ERCC6_1	3444	.	C	T	.	.	.	GT	0	0	1	1	1	0	1	0	1	0	0	0	1	0	1	0	0	0	0	0	0
ERCC6_1	3478	.	C	T	.	.	.	GT	0	0	1	1	1	0	0	0	0	0	0	0	0	0	0	0	0	0	0	0	0
ERCC6_1	3546	.	T	C	.	.	.	GT	0	0	1	1	1	0	1	1	1	1	1	0	1	0	1	0	0	0	0	0	0
ERCC6_1	3589	.	C	T	.	.	.	GT	0	0	1	1	1	0	1	0	0	0	0	0	1	0	1	0	0	0	0	0	0
ERCC6_1	3592	.	C	T	.	.	.	GT	0	0	0	0	0	0	0	1	0	1	1	0	0	0	0	0	0	0	0	0	1
ERCC6_1	3594	.	G	C	.	.	.	GT	0	0	1	1	1	0	1	0	1	0	0	0	1	0	1	0	0	0	0	0	0
ERCC6_1	3606	.	A	T	.	.	.	GT	0	0	1	1	1	0	1	0	1	0	0	0	1	0	1	0	0	0	0	0	0
ERCC6_1	3636	.	A	G,T	.	.	.	GT	0	0	1	1	1	0	1	1	1	1	1	0	1	0	1	0	0	0	0	1	0
#CHROM	POS	ID	REF (Morex)	ALT	QUAL	FILTER	INFO	FORMAT	Morex	Akashinriki	Barke	Golden_Promise	Hockett	HOR_10350	HOR_13821	HOR_13942	HOR_21599	HOR_3081	HOR_3365	HOR_7552	HOR_8148	HOR_9043	Igri	OUN333	RGT_Planet	ZDM01467	ZDM02064	B1K-04-12	OUH602
									HORVU.MOREX.r3.2HG0132190	HORVU_AKASHIN_2H01G241100	HORVU_BARKE_2H01G251300	HORVU_GOLDEN_2H01G215100	HORVU_HOCKETT_2H01G225400	HORVU_10350_2H01G247600	HORVU_13821_2H01G243300	HORVU_13942_2H01G241100	HORVU_21599_2H01G239600	HORVU_3081_2H01G243400	HORVU_HHOR_2H01G238000	HORVU_7552_2H01G242900	HORVU_8148_2H01G245300	HORVU_9043_2H01G244900	HORVU_IGRI_2H01G243300	HORVU_OUN333_2H01G238200	HORVU_PLANET_2H01G245200	HORVU_HUANG_2H01G234300	HORVU_CHIBA_2H01G240400	HORVU_FT11_2H01G242500	HORVU_OUH_2H01G236100
ERCC6_2	13	.	T	C	.	.	.	GT	0	0	0	0	0	0	0	0	0	0	0	0	0	0	0	0	0	0	0	1	0
ERCC6_2	31	.	C	T	.	.	.	GT	0	0	0	0	0	0	0	0	0	0	0	0	0	0	0	0	0	0	0	1	0
ERCC6_2	265	.	C	T	.	.	.	GT	0	0	0	0	0	0	0	1	0	0	0	0	0	0	0	0	0	0	0	0	0
ERCC6_2	2370	.	C	T	.	.	.	GT	0	0	0	0	0	1	0	0	0	0	0	0	0	0	0	0	0	0	0	0	1
ERCC6_2	2462	.	G	T	.	.	.	GT	0	1	0	0	0	0	0	0	0	0	0	0	0	0	0	0	0	0	0	0	0
ERCC6_2	2491	.	G	C	.	.	.	GT	0	0	0	0	0	0	0	0	0	0	0	0	0	0	0	0	0	0	0	1	0
#CHROM	POS	ID	REF (Morex)	ALT	QUAL	FILTER	INFO	FORMAT	Morex	Akashinriki	Barke	Golden_Promise	Hockett	HOR_10350	HOR_13821	HOR_13942	HOR_21599	HOR_3081	HOR_3365	HOR_7552	HOR_8148	HOR_9043	Igri	OUN333	RGT_Planet	ZDM01467	ZDM02064	B1K-04-12	OUH602
									HORVU.MOREX.r3.2HG0217790	HORVU_AKASHIN_2H01G762900	HORVU_BARKE_2H01G779600	HORVU_GOLDEN_2H01G702100	HORVU_HOCKETT_2H01G733800	HORVU_10350_2H01G776400	HORVU_13821_2H01G756400	HORVU_13942_2H01G751800	HORVU_21599_2H01G762200	HORVU_3081_2H01G771300	HORVU_HHOR_2H01G760200	HORVU_7552_2H01G761100	HORVU_8148_2H01G763200	HORVU_9043_2H01G762200	HORVU_IGRI_2H01G760800	HORVU_OUN333_2H01G761800	HORVU_PLANET_2H01G771400	HORVU_HUANG_2H01G756100	HORVU_CHIBA_2H01G766600	HORVU_FT11_2H01G764300	HORVU_OUH_2H01G746200
ERCC6_3	51	.	T	C	.	.	.	GT	0	NA	NA	NA	1	NA	NA	NA	NA	NA	NA	NA	NA	NA	NA	NA	NA	NA	NA	NA	NA
ERCC6_3	55	.	T	G	.	.	.	GT	0	NA	NA	NA	1	NA	NA	NA	NA	NA	NA	NA	NA	NA	NA	NA	NA	NA	NA	NA	NA
ERCC6_3	56	.	C	A	.	.	.	GT	0	NA	NA	NA	1	NA	NA	NA	NA	NA	NA	NA	NA	NA	NA	NA	NA	NA	NA	NA	NA
ERCC6_3	85	.	C	A	.	.	.	GT	0	NA	NA	NA	0	NA	NA	NA	NA	NA	1	NA	NA	NA	NA	NA	NA	NA	NA	NA	NA
ERCC6_3	86	.	C	T	.	.	.	GT	0	NA	NA	NA	0	NA	NA	NA	NA	NA	1	NA	NA	NA	NA	NA	NA	NA	NA	NA	NA
ERCC6_3	91	.	C	T	.	.	.	GT	0	NA	NA	NA	0	NA	NA	NA	NA	NA	1	NA	NA	NA	NA	NA	NA	NA	NA	NA	NA
ERCC6_3	93	.	G	C	.	.	.	GT	0	NA	NA	NA	1	NA	NA	NA	NA	NA	1	NA	NA	NA	NA	NA	NA	NA	NA	NA	NA
ERCC6_3	96	.	G	A	.	.	.	GT	0	NA	NA	NA	0	NA	NA	NA	NA	NA	1	NA	NA	NA	NA	NA	NA	NA	NA	NA	NA
ERCC6_3	99	.	C	G	.	.	.	GT	0	NA	NA	NA	0	NA	NA	NA	NA	NA	1	NA	NA	NA	NA	NA	NA	NA	NA	NA	NA
ERCC6_3	100	.	C	T	.	.	.	GT	0	NA	NA	NA	0	NA	NA	NA	NA	NA	1	NA	NA	NA	NA	NA	NA	NA	NA	NA	NA
ERCC6_3	102	.	G	C	.	.	.	GT	0	NA	NA	NA	0	NA	NA	NA	NA	NA	1	NA	NA	NA	NA	NA	NA	NA	NA	NA	NA
ERCC6_3	103	.	C	T	.	.	.	GT	0	NA	NA	NA	0	NA	NA	NA	NA	NA	1	NA	NA	NA	NA	NA	NA	NA	NA	NA	NA
ERCC6_3	104	.	C	T	.	.	.	GT	0	NA	NA	NA	0	NA	NA	NA	NA	NA	1	NA	NA	NA	NA	NA	NA	NA	NA	NA	NA
ERCC6_3	106	.	A	G	.	.	.	GT	0	NA	NA	NA	0	NA	NA	NA	NA	NA	1	NA	NA	NA	NA	NA	NA	NA	NA	NA	NA
ERCC6_3	107	.	C	A	.	.	.	GT	0	NA	NA	NA	0	NA	NA	NA	NA	NA	1	NA	NA	NA	NA	NA	NA	NA	NA	NA	NA
ERCC6_3	109	.	C	T	.	.	.	GT	0	NA	NA	NA	0	NA	NA	NA	NA	NA	1	NA	NA	NA	NA	NA	NA	NA	NA	NA	NA
ERCC6_3	110	.	C	T	.	.	.	GT	0	NA	NA	NA	0	NA	NA	NA	NA	NA	1	NA	NA	NA	NA	NA	NA	NA	NA	NA	NA
ERCC6_3	112	.	A	T	.	.	.	GT	0	NA	NA	NA	0	NA	NA	NA	NA	NA	1	NA	NA	NA	NA	NA	NA	NA	NA	NA	NA
ERCC6_3	113	.	A	T	.	.	.	GT	0	NA	NA	NA	0	NA	NA	NA	NA	NA	1	NA	NA	NA	NA	NA	NA	NA	NA	NA	NA
ERCC6_3	115	.	G	T	.	.	.	GT	0	NA	NA	NA	0	NA	NA	NA	NA	NA	1	NA	NA	NA	NA	NA	NA	NA	NA	NA	NA
ERCC6_3	116	.	G	C	.	.	.	GT	0	NA	NA	NA	0	NA	NA	NA	NA	NA	1	NA	NA	NA	NA	NA	NA	NA	NA	NA	NA
ERCC6_3	118	.	C	G	.	.	.	GT	0	NA	NA	NA	0	NA	NA	NA	NA	NA	1	NA	NA	NA	NA	NA	NA	NA	NA	NA	NA
ERCC6_3	119	.	T	A	.	.	.	GT	0	NA	NA	NA	0	NA	NA	NA	NA	NA	1	NA	NA	NA	NA	NA	NA	NA	NA	NA	NA
ERCC6_3	121	.	A	G	.	.	.	GT	0	NA	NA	NA	0	NA	NA	NA	NA	NA	1	NA	NA	NA	NA	NA	NA	NA	NA	NA	NA
ERCC6_3	122	.	A	C	.	.	.	GT	0	NA	NA	NA	0	NA	NA	NA	NA	NA	1	NA	NA	NA	NA	NA	NA	NA	NA	NA	NA
ERCC6_3	123	.	C	G	.	.	.	GT	0	NA	NA	NA	0	NA	NA	NA	NA	NA	1	NA	NA	NA	NA	NA	NA	NA	NA	NA	NA
ERCC6_3	124	.	G	C	.	.	.	GT	0	NA	NA	NA	0	NA	NA	NA	NA	NA	1	NA	NA	NA	NA	NA	NA	NA	NA	NA	NA
ERCC6_3	125	.	A	T	.	.	.	GT	0	NA	NA	NA	0	NA	NA	NA	NA	NA	1	NA	NA	NA	NA	NA	NA	NA	NA	NA	NA
ERCC6_3	127	.	C	G	.	.	.	GT	0	NA	NA	NA	0	NA	NA	NA	NA	NA	1	NA	NA	NA	NA	NA	NA	NA	NA	NA	NA
ERCC6_3	128	.	G	A	.	.	.	GT	0	NA	NA	NA	0	NA	NA	NA	NA	NA	1	NA	NA	NA	NA	NA	NA	NA	NA	NA	NA
ERCC6_3	130	.	C	G	.	.	.	GT	0	NA	NA	NA	0	NA	NA	NA	NA	NA	1	NA	NA	NA	NA	NA	NA	NA	NA	NA	NA
ERCC6_3	131	.	T	A	.	.	.	GT	0	NA	NA	NA	0	NA	NA	NA	NA	NA	1	NA	NA	NA	NA	NA	NA	NA	NA	NA	NA
ERCC6_3	132	.	G	C	.	.	.	GT	0	NA	NA	NA	0	NA	NA	NA	NA	NA	1	NA	NA	NA	NA	NA	NA	NA	NA	NA	NA
ERCC6_3	133	.	C	G	.	.	.	GT	0	NA	NA	NA	0	NA	NA	NA	NA	NA	1	NA	NA	NA	NA	NA	NA	NA	NA	NA	NA
ERCC6_3	134	.	T	A	.	.	.	GT	0	NA	NA	NA	0	NA	NA	NA	NA	NA	1	NA	NA	NA	NA	NA	NA	NA	NA	NA	NA
ERCC6_3	136	.	C	G	.	.	.	GT	0	NA	NA	NA	0	NA	NA	NA	NA	NA	1	NA	NA	NA	NA	NA	NA	NA	NA	NA	NA
ERCC6_3	137	.	G	C	.	.	.	GT	0	NA	NA	NA	0	NA	NA	NA	NA	NA	1	NA	NA	NA	NA	NA	NA	NA	NA	NA	NA
ERCC6_3	139	.	T	G	.	.	.	GT	0	NA	NA	NA	0	NA	NA	NA	NA	NA	1	NA	NA	NA	NA	NA	NA	NA	NA	NA	NA
ERCC6_3	140	.	T	A	.	.	.	GT	0	NA	NA	NA	0	NA	NA	NA	NA	NA	1	NA	NA	NA	NA	NA	NA	NA	NA	NA	NA
ERCC6_3	142	.	A	G	.	.	.	GT	0	NA	NA	NA	0	NA	NA	NA	NA	NA	1	NA	NA	NA	NA	NA	NA	NA	NA	NA	NA
ERCC6_3	147	.	G	A	.	.	.	GT	0	NA	NA	NA	0	NA	NA	NA	NA	NA	1	NA	NA	NA	NA	NA	NA	NA	NA	NA	NA
ERCC6_3	149	.	G	A	.	.	.	GT	0	NA	NA	NA	0	NA	NA	NA	NA	NA	1	NA	NA	NA	NA	NA	NA	NA	NA	NA	NA
ERCC6_3	152	.	G	C	.	.	.	GT	0	NA	NA	NA	0	NA	NA	NA	NA	NA	1	NA	NA	NA	NA	NA	NA	NA	NA	NA	NA
ERCC6_3	153	.	A	T	.	.	.	GT	0	NA	NA	NA	0	NA	NA	NA	NA	NA	1	NA	NA	NA	NA	NA	NA	NA	NA	NA	NA
ERCC6_3	154	.	C	A	.	.	.	GT	0	NA	NA	NA	0	NA	NA	NA	NA	NA	1	NA	NA	NA	NA	NA	NA	NA	NA	NA	NA
ERCC6_3	155	.	C	A	.	.	.	GT	0	NA	NA	NA	0	NA	NA	NA	NA	NA	1	NA	NA	NA	NA	NA	NA	NA	NA	NA	NA
ERCC6_3	158	.	G	C	.	.	.	GT	0	NA	NA	NA	0	NA	NA	NA	NA	NA	1	NA	NA	NA	NA	NA	NA	NA	NA	NA	NA
ERCC6_3	161	.	C	A	.	.	.	GT	0	NA	NA	NA	0	NA	NA	NA	NA	NA	1	NA	NA	NA	NA	NA	NA	NA	NA	NA	NA
ERCC6_3	165	.	A	C	.	.	.	GT	0	NA	NA	NA	0	NA	NA	NA	NA	NA	1	NA	NA	NA	NA	NA	NA	NA	NA	NA	NA
ERCC6_3	166	.	C	A	.	.	.	GT	0	NA	NA	NA	0	NA	NA	NA	NA	NA	1	NA	NA	NA	NA	NA	NA	NA	NA	NA	NA
ERCC6_3	167	.	A	C	.	.	.	GT	0	NA	NA	NA	0	NA	NA	NA	NA	NA	1	NA	NA	NA	NA	NA	NA	NA	NA	NA	NA
ERCC6_3	168	.	A	G	.	.	.	GT	0	NA	NA	NA	0	NA	NA	NA	NA	NA	1	NA	NA	NA	NA	NA	NA	NA	NA	NA	NA
ERCC6_3	169	.	A	C	.	.	.	GT	0	NA	NA	NA	0	NA	NA	NA	NA	NA	1	NA	NA	NA	NA	NA	NA	NA	NA	NA	NA
ERCC6_3	170	.	A	C	.	.	.	GT	0	NA	NA	NA	0	NA	NA	NA	NA	NA	1	NA	NA	NA	NA	NA	NA	NA	NA	NA	NA
ERCC6_3	171	.	C	G	.	.	.	GT	0	NA	NA	NA	0	NA	NA	NA	NA	NA	1	NA	NA	NA	NA	NA	NA	NA	NA	NA	NA
ERCC6_3	172	.	C	G	.	.	.	GT	0	NA	NA	NA	0	NA	NA	NA	NA	NA	1	NA	NA	NA	NA	NA	NA	NA	NA	NA	NA
ERCC6_3	174	.	T	G	.	.	.	GT	0	NA	NA	NA	0	NA	NA	NA	NA	NA	1	NA	NA	NA	NA	NA	NA	NA	NA	NA	NA
ERCC6_3	175	.	A	C	.	.	.	GT	0	NA	NA	NA	0	NA	NA	NA	NA	NA	1	NA	NA	NA	NA	NA	NA	NA	NA	NA	NA
ERCC6_3	180	.	C	G	.	.	.	GT	0	NA	NA	NA	0	NA	NA	NA	NA	NA	1	NA	NA	NA	NA	NA	NA	NA	NA	NA	NA
ERCC6_3	183	.	G	C	.	.	.	GT	0	NA	NA	NA	0	NA	NA	NA	NA	NA	1	NA	NA	NA	NA	NA	NA	NA	NA	NA	NA
ERCC6_3	189	.	A	C	.	.	.	GT	0	NA	NA	NA	0	NA	NA	NA	NA	NA	1	NA	NA	NA	NA	NA	NA	NA	NA	NA	NA
ERCC6_3	190	.	G	C	.	.	.	GT	0	NA	NA	NA	0	NA	NA	NA	NA	NA	1	NA	NA	NA	NA	NA	NA	NA	NA	NA	NA
ERCC6_3	192	.	C	G	.	.	.	GT	0	NA	NA	NA	0	NA	NA	NA	NA	NA	1	NA	NA	NA	NA	NA	NA	NA	NA	NA	NA
ERCC6_3	194	.	A	C	.	.	.	GT	0	NA	NA	NA	0	NA	NA	NA	NA	NA	1	NA	NA	NA	NA	NA	NA	NA	NA	NA	NA
ERCC6_3	196	.	G	A	.	.	.	GT	0	NA	NA	NA	0	NA	NA	NA	NA	NA	1	NA	NA	NA	NA	NA	NA	NA	NA	NA	NA
ERCC6_3	200	.	A	C	.	.	.	GT	0	NA	NA	NA	0	NA	NA	NA	NA	NA	1	NA	NA	NA	NA	NA	NA	NA	NA	NA	NA
ERCC6_3	202	.	C	A	.	.	.	GT	0	NA	NA	NA	0	NA	NA	NA	NA	NA	1	NA	NA	NA	NA	NA	NA	NA	NA	NA	NA
ERCC6_3	204	.	G	C	.	.	.	GT	0	NA	NA	NA	0	NA	NA	NA	NA	NA	1	NA	NA	NA	NA	NA	NA	NA	NA	NA	NA
ERCC6_3	205	.	C	G	.	.	.	GT	0	NA	NA	NA	0	NA	NA	NA	NA	NA	1	NA	NA	NA	NA	NA	NA	NA	NA	NA	NA
ERCC6_3	206	.	C	G	.	.	.	GT	0	NA	NA	NA	0	NA	NA	NA	NA	NA	1	NA	NA	NA	NA	NA	NA	NA	NA	NA	NA
ERCC6_3	210	.	G	C	.	.	.	GT	0	NA	NA	NA	0	NA	NA	NA	NA	NA	1	NA	NA	NA	NA	NA	NA	NA	NA	NA	NA
ERCC6_3	211	.	C	A	.	.	.	GT	0	NA	NA	NA	0	NA	NA	NA	NA	NA	1	NA	NA	NA	NA	NA	NA	NA	NA	NA	NA
ERCC6_3	212	.	C	A	.	.	.	GT	0	NA	NA	NA	0	NA	NA	NA	NA	NA	1	NA	NA	NA	NA	NA	NA	NA	NA	NA	NA
ERCC6_3	214	.	C	G	.	.	.	GT	0	NA	NA	NA	0	NA	NA	NA	NA	NA	1	NA	NA	NA	NA	NA	NA	NA	NA	NA	NA
ERCC6_3	216	.	G	C	.	.	.	GT	0	NA	NA	NA	0	NA	NA	NA	NA	NA	1	NA	NA	NA	NA	NA	NA	NA	NA	NA	NA
ERCC6_3	217	.	G	C	.	.	.	GT	0	NA	NA	NA	0	NA	NA	NA	NA	NA	1	NA	NA	NA	NA	NA	NA	NA	NA	NA	NA
ERCC6_3	218	.	A	G	.	.	.	GT	0	NA	NA	NA	0	NA	NA	NA	NA	NA	1	NA	NA	NA	NA	NA	NA	NA	NA	NA	NA
ERCC6_3	221	.	G	T	.	.	.	GT	0	NA	NA	NA	0	NA	NA	NA	NA	NA	1	NA	NA	NA	NA	NA	NA	NA	NA	NA	NA
ERCC6_3	222	.	C	G	.	.	.	GT	0	NA	NA	NA	0	NA	NA	NA	NA	NA	1	NA	NA	NA	NA	NA	NA	NA	NA	NA	NA
ERCC6_3	223	.	A	C	.	.	.	GT	0	NA	NA	NA	0	NA	NA	NA	NA	NA	1	NA	NA	NA	NA	NA	NA	NA	NA	NA	NA
ERCC6_3	224	.	A	T	.	.	.	GT	0	NA	NA	NA	0	NA	NA	NA	NA	NA	1	NA	NA	NA	NA	NA	NA	NA	NA	NA	NA
ERCC6_3	225	.	G	C	.	.	.	GT	0	NA	NA	NA	0	NA	NA	NA	NA	NA	1	NA	NA	NA	NA	NA	NA	NA	NA	NA	NA
ERCC6_3	226	.	G	C	.	.	.	GT	0	NA	NA	NA	0	NA	NA	NA	NA	NA	1	NA	NA	NA	NA	NA	NA	NA	NA	NA	NA
ERCC6_3	227	.	T	G	.	.	.	GT	0	NA	NA	NA	0	NA	NA	NA	NA	NA	1	NA	NA	NA	NA	NA	NA	NA	NA	NA	NA
ERCC6_3	229	.	A	T	.	.	.	GT	0	NA	NA	NA	0	NA	NA	NA	NA	NA	1	NA	NA	NA	NA	NA	NA	NA	NA	NA	NA
ERCC6_3	230	.	A	T	.	.	.	GT	0	NA	NA	NA	0	NA	NA	NA	NA	NA	1	NA	NA	NA	NA	NA	NA	NA	NA	NA	NA
ERCC6_3	231	.	G	C	.	.	.	GT	0	NA	NA	NA	0	NA	NA	NA	NA	NA	1	NA	NA	NA	NA	NA	NA	NA	NA	NA	NA
ERCC6_3	232	.	C	A	.	.	.	GT	0	NA	NA	NA	0	NA	NA	NA	NA	NA	1	NA	NA	NA	NA	NA	NA	NA	NA	NA	NA
ERCC6_3	233	.	T	C	.	.	.	GT	0	NA	NA	NA	0	NA	NA	NA	NA	NA	1	NA	NA	NA	NA	NA	NA	NA	NA	NA	NA
ERCC6_3	235	.	G	C	.	.	.	GT	0	NA	NA	NA	0	NA	NA	NA	NA	NA	1	NA	NA	NA	NA	NA	NA	NA	NA	NA	NA
ERCC6_3	236	.	C	A	.	.	.	GT	0	NA	NA	NA	0	NA	NA	NA	NA	NA	1	NA	NA	NA	NA	NA	NA	NA	NA	NA	NA
ERCC6_3	237	.	C	G	.	.	.	GT	0	NA	NA	NA	0	NA	NA	NA	NA	NA	1	NA	NA	NA	NA	NA	NA	NA	NA	NA	NA
ERCC6_3	238	.	G	A	.	.	.	GT	0	NA	NA	NA	0	NA	NA	NA	NA	NA	1	NA	NA	NA	NA	NA	NA	NA	NA	NA	NA
ERCC6_3	243	.	C	A	.	.	.	GT	0	NA	NA	NA	0	NA	NA	NA	NA	NA	1	NA	NA	NA	NA	NA	NA	NA	NA	NA	NA
ERCC6_3	245	.	G	C	.	.	.	GT	0	NA	NA	NA	0	NA	NA	NA	NA	NA	1	NA	NA	NA	NA	NA	NA	NA	NA	NA	NA
ERCC6_3	246	.	A	C	.	.	.	GT	0	NA	NA	NA	0	NA	NA	NA	NA	NA	1	NA	NA	NA	NA	NA	NA	NA	NA	NA	NA
ERCC6_3	251	.	T	C	.	.	.	GT	0	NA	NA	NA	0	NA	NA	NA	NA	NA	1	NA	NA	NA	NA	NA	NA	NA	NA	NA	NA
ERCC6_3	253	.	T	C	.	.	.	GT	0	NA	NA	NA	0	NA	NA	NA	NA	NA	1	NA	NA	NA	NA	NA	NA	NA	NA	NA	NA
ERCC6_3	254	.	G	C	.	.	.	GT	0	NA	NA	NA	0	NA	NA	NA	NA	NA	1	NA	NA	NA	NA	NA	NA	NA	NA	NA	NA
ERCC6_3	255	.	C	A	.	.	.	GT	0	NA	NA	NA	0	NA	NA	NA	NA	NA	1	NA	NA	NA	NA	NA	NA	NA	NA	NA	NA
ERCC6_3	256	.	A	C	.	.	.	GT	0	NA	NA	NA	0	NA	NA	NA	NA	NA	1	NA	NA	NA	NA	NA	NA	NA	NA	NA	NA
ERCC6_3	258	.	G	A	.	.	.	GT	0	NA	NA	NA	0	NA	NA	NA	NA	NA	1	NA	NA	NA	NA	NA	NA	NA	NA	NA	NA
ERCC6_3	259	.	C	A	.	.	.	GT	0	NA	NA	NA	0	NA	NA	NA	NA	NA	1	NA	NA	NA	NA	NA	NA	NA	NA	NA	NA
ERCC6_3	260	.	T	A	.	.	.	GT	0	NA	NA	NA	0	NA	NA	NA	NA	NA	1	NA	NA	NA	NA	NA	NA	NA	NA	NA	NA
ERCC6_3	261	.	A	C	.	.	.	GT	0	NA	NA	NA	0	NA	NA	NA	NA	NA	1	NA	NA	NA	NA	NA	NA	NA	NA	NA	NA
ERCC6_3	262	.	T	C	.	.	.	GT	0	NA	NA	NA	0	NA	NA	NA	NA	NA	1	NA	NA	NA	NA	NA	NA	NA	NA	NA	NA
ERCC6_3	264	.	A	T	.	.	.	GT	0	NA	NA	NA	0	NA	NA	NA	NA	NA	1	NA	NA	NA	NA	NA	NA	NA	NA	NA	NA
ERCC6_3	265	.	T	A	.	.	.	GT	0	NA	NA	NA	0	NA	NA	NA	NA	NA	1	NA	NA	NA	NA	NA	NA	NA	NA	NA	NA
ERCC6_3	266	.	C	A	.	.	.	GT	0	NA	NA	NA	0	NA	NA	NA	NA	NA	1	NA	NA	NA	NA	NA	NA	NA	NA	NA	NA
ERCC6_3	268	.	T	C	.	.	.	GT	0	NA	NA	NA	0	NA	NA	NA	NA	NA	1	NA	NA	NA	NA	NA	NA	NA	NA	NA	NA
ERCC6_3	273	.	C	G	.	.	.	GT	0	NA	NA	NA	0	NA	NA	NA	NA	NA	1	NA	NA	NA	NA	NA	NA	NA	NA	NA	NA
ERCC6_3	274	.	G	C	.	.	.	GT	0	NA	NA	NA	0	NA	NA	NA	NA	NA	1	NA	NA	NA	NA	NA	NA	NA	NA	NA	NA
ERCC6_3	275	.	A	C	.	.	.	GT	0	NA	NA	NA	0	NA	NA	NA	NA	NA	1	NA	NA	NA	NA	NA	NA	NA	NA	NA	NA
ERCC6_3	276	.	C	G	.	.	.	GT	0	NA	NA	NA	0	NA	NA	NA	NA	NA	1	NA	NA	NA	NA	NA	NA	NA	NA	NA	NA
ERCC6_3	278	.	A	C	.	.	.	GT	0	NA	NA	NA	0	NA	NA	NA	NA	NA	1	NA	NA	NA	NA	NA	NA	NA	NA	NA	NA
ERCC6_3	279	.	C	A	.	.	.	GT	0	NA	NA	NA	0	NA	NA	NA	NA	NA	1	NA	NA	NA	NA	NA	NA	NA	NA	NA	NA
ERCC6_3	281	.	A	C	.	.	.	GT	0	NA	NA	NA	0	NA	NA	NA	NA	NA	1	NA	NA	NA	NA	NA	NA	NA	NA	NA	NA
ERCC6_3	287	.	A	C	.	.	.	GT	0	NA	NA	NA	0	NA	NA	NA	NA	NA	1	NA	NA	NA	NA	NA	NA	NA	NA	NA	NA
ERCC6_3	289	.	A	C	.	.	.	GT	0	NA	NA	NA	0	NA	NA	NA	NA	NA	1	NA	NA	NA	NA	NA	NA	NA	NA	NA	NA
ERCC6_3	291	.	G	C	.	.	.	GT	0	NA	NA	NA	0	NA	NA	NA	NA	NA	1	NA	NA	NA	NA	NA	NA	NA	NA	NA	NA
ERCC6_3	294	.	C	G	.	.	.	GT	0	NA	NA	NA	0	NA	NA	NA	NA	NA	1	NA	NA	NA	NA	NA	NA	NA	NA	NA	NA
ERCC6_3	295	.	G	C	.	.	.	GT	0	NA	NA	NA	0	NA	NA	NA	NA	NA	1	NA	NA	NA	NA	NA	NA	NA	NA	NA	NA
ERCC6_3	296	.	A	C	.	.	.	GT	0	NA	NA	NA	0	NA	NA	NA	NA	NA	1	NA	NA	NA	NA	NA	NA	NA	NA	NA	NA
ERCC6_3	297	.	G	C	.	.	.	GT	0	NA	NA	NA	0	NA	NA	NA	NA	NA	1	NA	NA	NA	NA	NA	NA	NA	NA	NA	NA
ERCC6_3	298	.	G	C	.	.	.	GT	0	NA	NA	NA	0	NA	NA	NA	NA	NA	1	NA	NA	NA	NA	NA	NA	NA	NA	NA	NA
ERCC6_3	299	.	A	T	.	.	.	GT	0	NA	NA	NA	0	NA	NA	NA	NA	NA	1	NA	NA	NA	NA	NA	NA	NA	NA	NA	NA
ERCC6_3	300	.	C	G	.	.	.	GT	0	NA	NA	NA	0	NA	NA	NA	NA	NA	1	NA	NA	NA	NA	NA	NA	NA	NA	NA	NA
ERCC6_3	301	.	A	C	.	.	.	GT	0	NA	NA	NA	0	NA	NA	NA	NA	NA	1	NA	NA	NA	NA	NA	NA	NA	NA	NA	NA
ERCC6_3	302	.	G	C	.	.	.	GT	0	NA	NA	NA	0	NA	NA	NA	NA	NA	1	NA	NA	NA	NA	NA	NA	NA	NA	NA	NA
ERCC6_3	304	.	A	C	.	.	.	GT	0	NA	NA	NA	0	NA	NA	NA	NA	NA	1	NA	NA	NA	NA	NA	NA	NA	NA	NA	NA
ERCC6_3	305	.	T	A	.	.	.	GT	0	NA	NA	NA	0	NA	NA	NA	NA	NA	1	NA	NA	NA	NA	NA	NA	NA	NA	NA	NA
ERCC6_3	306	.	C	G	.	.	.	GT	0	NA	NA	NA	0	NA	NA	NA	NA	NA	1	NA	NA	NA	NA	NA	NA	NA	NA	NA	NA
ERCC6_3	307	.	C	G	.	.	.	GT	0	NA	NA	NA	0	NA	NA	NA	NA	NA	1	NA	NA	NA	NA	NA	NA	NA	NA	NA	NA
ERCC6_3	308	.	G	A	.	.	.	GT	0	NA	NA	NA	0	NA	NA	NA	NA	NA	1	NA	NA	NA	NA	NA	NA	NA	NA	NA	NA
ERCC6_3	310	.	G	C	.	.	.	GT	0	NA	NA	NA	0	NA	NA	NA	NA	NA	1	NA	NA	NA	NA	NA	NA	NA	NA	NA	NA
ERCC6_3	311	.	A	G	.	.	.	GT	0	NA	NA	NA	0	NA	NA	NA	NA	NA	1	NA	NA	NA	NA	NA	NA	NA	NA	NA	NA
ERCC6_3	314	.	T	A	.	.	.	GT	0	NA	NA	NA	0	NA	NA	NA	NA	NA	1	NA	NA	NA	NA	NA	NA	NA	NA	NA	NA
ERCC6_3	315	.	C	G	.	.	.	GT	0	NA	NA	NA	0	NA	NA	NA	NA	NA	1	NA	NA	NA	NA	NA	NA	NA	NA	NA	NA
ERCC6_3	316	.	C	G	.	.	.	GT	0	NA	NA	NA	0	NA	NA	NA	NA	NA	1	NA	NA	NA	NA	NA	NA	NA	NA	NA	NA
ERCC6_3	319	.	G	A	.	.	.	GT	0	NA	NA	NA	0	NA	NA	NA	NA	NA	1	NA	NA	NA	NA	NA	NA	NA	NA	NA	NA
ERCC6_3	321	.	C	G	.	.	.	GT	0	NA	NA	NA	0	NA	NA	NA	NA	NA	1	NA	NA	NA	NA	NA	NA	NA	NA	NA	NA
ERCC6_3	322	.	G	C	.	.	.	GT	0	NA	NA	NA	0	NA	NA	NA	NA	NA	1	NA	NA	NA	NA	NA	NA	NA	NA	NA	NA
ERCC6_3	323	.	A	T	.	.	.	GT	0	NA	NA	NA	0	NA	NA	NA	NA	NA	1	NA	NA	NA	NA	NA	NA	NA	NA	NA	NA
ERCC6_3	325	.	C	G	.	.	.	GT	0	NA	NA	NA	0	NA	NA	NA	NA	NA	1	NA	NA	NA	NA	NA	NA	NA	NA	NA	NA
ERCC6_3	326	.	T	C	.	.	.	GT	0	NA	NA	NA	0	NA	NA	NA	NA	NA	1	NA	NA	NA	NA	NA	NA	NA	NA	NA	NA
ERCC6_3	329	.	C	G	.	.	.	GT	0	NA	NA	NA	0	NA	NA	NA	NA	NA	1	NA	NA	NA	NA	NA	NA	NA	NA	NA	NA
ERCC6_3	331	.	A	C	.	.	.	GT	0	NA	NA	NA	0	NA	NA	NA	NA	NA	1	NA	NA	NA	NA	NA	NA	NA	NA	NA	NA
ERCC6_3	332	.	C	G	.	.	.	GT	0	NA	NA	NA	0	NA	NA	NA	NA	NA	1	NA	NA	NA	NA	NA	NA	NA	NA	NA	NA
ERCC6_3	336	.	C	A	.	.	.	GT	0	NA	NA	NA	0	NA	NA	NA	NA	NA	1	NA	NA	NA	NA	NA	NA	NA	NA	NA	NA
ERCC6_3	338	.	T	G	.	.	.	GT	0	NA	NA	NA	0	NA	NA	NA	NA	NA	1	NA	NA	NA	NA	NA	NA	NA	NA	NA	NA
ERCC6_3	339	.	A	C	.	.	.	GT	0	NA	NA	NA	0	NA	NA	NA	NA	NA	1	NA	NA	NA	NA	NA	NA	NA	NA	NA	NA
ERCC6_3	340	.	G	C	.	.	.	GT	0	NA	NA	NA	0	NA	NA	NA	NA	NA	1	NA	NA	NA	NA	NA	NA	NA	NA	NA	NA
ERCC6_3	341	.	A	T	.	.	.	GT	0	NA	NA	NA	0	NA	NA	NA	NA	NA	1	NA	NA	NA	NA	NA	NA	NA	NA	NA	NA
ERCC6_3	344	.	C	G	.	.	.	GT	0	NA	NA	NA	0	NA	NA	NA	NA	NA	1	NA	NA	NA	NA	NA	NA	NA	NA	NA	NA
ERCC6_3	346	.	C	A	.	.	.	GT	0	NA	NA	NA	0	NA	NA	NA	NA	NA	1	NA	NA	NA	NA	NA	NA	NA	NA	NA	NA
ERCC6_3	347	.	T	A	.	.	.	GT	0	NA	NA	NA	0	NA	NA	NA	NA	NA	1	NA	NA	NA	NA	NA	NA	NA	NA	NA	NA
ERCC6_3	348	.	C	G	.	.	.	GT	0	NA	NA	NA	0	NA	NA	NA	NA	NA	1	NA	NA	NA	NA	NA	NA	NA	NA	NA	NA
ERCC6_3	349	.	T	C	.	.	.	GT	0	NA	NA	NA	0	NA	NA	NA	NA	NA	1	NA	NA	NA	NA	NA	NA	NA	NA	NA	NA
ERCC6_3	350	.	C	T	.	.	.	GT	0	NA	NA	NA	0	NA	NA	NA	NA	NA	1	NA	NA	NA	NA	NA	NA	NA	NA	NA	NA
ERCC6_3	351	.	C	A	.	.	.	GT	0	NA	NA	NA	0	NA	NA	NA	NA	NA	1	NA	NA	NA	NA	NA	NA	NA	NA	NA	NA
ERCC6_3	352	.	G	T	.	.	.	GT	0	NA	NA	NA	0	NA	NA	NA	NA	NA	1	NA	NA	NA	NA	NA	NA	NA	NA	NA	NA
ERCC6_3	353	.	T	C	.	.	.	GT	0	NA	NA	NA	0	NA	NA	NA	NA	NA	1	NA	NA	NA	NA	NA	NA	NA	NA	NA	NA
ERCC6_3	354	.	C	A	.	.	.	GT	0	NA	NA	NA	0	NA	NA	NA	NA	NA	1	NA	NA	NA	NA	NA	NA	NA	NA	NA	NA
ERCC6_3	355	.	G	T	.	.	.	GT	0	NA	NA	NA	0	NA	NA	NA	NA	NA	1	NA	NA	NA	NA	NA	NA	NA	NA	NA	NA
ERCC6_3	356	.	A	C	.	.	.	GT	0	NA	NA	NA	0	NA	NA	NA	NA	NA	1	NA	NA	NA	NA	NA	NA	NA	NA	NA	NA
ERCC6_3	358	.	A	T	.	.	.	GT	0	NA	NA	NA	0	NA	NA	NA	NA	NA	1	NA	NA	NA	NA	NA	NA	NA	NA	NA	NA
ERCC6_3	359	.	G	C	.	.	.	GT	0	NA	NA	NA	0	NA	NA	NA	NA	NA	1	NA	NA	NA	NA	NA	NA	NA	NA	NA	NA
ERCC6_3	360	.	G	C	.	.	.	GT	0	NA	NA	NA	0	NA	NA	NA	NA	NA	1	NA	NA	NA	NA	NA	NA	NA	NA	NA	NA
ERCC6_3	364	.	A	G	.	.	.	GT	0	NA	NA	NA	0	NA	NA	NA	NA	NA	1	NA	NA	NA	NA	NA	NA	NA	NA	NA	NA
ERCC6_3	366	.	A	C	.	.	.	GT	0	NA	NA	NA	0	NA	NA	NA	NA	NA	1	NA	NA	NA	NA	NA	NA	NA	NA	NA	NA
ERCC6_3	367	.	G	C	.	.	.	GT	0	NA	NA	NA	0	NA	NA	NA	NA	NA	1	NA	NA	NA	NA	NA	NA	NA	NA	NA	NA
ERCC6_3	368	.	C	A	.	.	.	GT	0	NA	NA	NA	0	NA	NA	NA	NA	NA	1	NA	NA	NA	NA	NA	NA	NA	NA	NA	NA
ERCC6_3	370	.	C	G	.	.	.	GT	0	NA	NA	NA	0	NA	NA	NA	NA	NA	1	NA	NA	NA	NA	NA	NA	NA	NA	NA	NA
ERCC6_3	371	.	G	A	.	.	.	GT	0	NA	NA	NA	0	NA	NA	NA	NA	NA	1	NA	NA	NA	NA	NA	NA	NA	NA	NA	NA
ERCC6_3	374	.	C	A	.	.	.	GT	0	NA	NA	NA	0	NA	NA	NA	NA	NA	1	NA	NA	NA	NA	NA	NA	NA	NA	NA	NA
ERCC6_3	376	.	A	G	.	.	.	GT	0	NA	NA	NA	0	NA	NA	NA	NA	NA	1	NA	NA	NA	NA	NA	NA	NA	NA	NA	NA
ERCC6_3	377	.	G	A	.	.	.	GT	0	NA	NA	NA	0	NA	NA	NA	NA	NA	1	NA	NA	NA	NA	NA	NA	NA	NA	NA	NA
ERCC6_3	378	.	G	C	.	.	.	GT	0	NA	NA	NA	0	NA	NA	NA	NA	NA	1	NA	NA	NA	NA	NA	NA	NA	NA	NA	NA
ERCC6_3	379	.	C	A	.	.	.	GT	0	NA	NA	NA	0	NA	NA	NA	NA	NA	1	NA	NA	NA	NA	NA	NA	NA	NA	NA	NA
ERCC6_3	380	.	C	A	.	.	.	GT	0	NA	NA	NA	0	NA	NA	NA	NA	NA	1	NA	NA	NA	NA	NA	NA	NA	NA	NA	NA
ERCC6_3	381	.	C	G	.	.	.	GT	0	NA	NA	NA	0	NA	NA	NA	NA	NA	1	NA	NA	NA	NA	NA	NA	NA	NA	NA	NA
ERCC6_3	383	.	C	A	.	.	.	GT	0	NA	NA	NA	0	NA	NA	NA	NA	NA	1	NA	NA	NA	NA	NA	NA	NA	NA	NA	NA
ERCC6_3	385	.	C	G	.	.	.	GT	0	NA	NA	NA	0	NA	NA	NA	NA	NA	1	NA	NA	NA	NA	NA	NA	NA	NA	NA	NA
ERCC6_3	389	.	C	A	.	.	.	GT	0	NA	NA	NA	0	NA	NA	NA	NA	NA	1	NA	NA	NA	NA	NA	NA	NA	NA	NA	NA
ERCC6_3	393	.	G	C	.	.	.	GT	0	NA	NA	NA	0	NA	NA	NA	NA	NA	1	NA	NA	NA	NA	NA	NA	NA	NA	NA	NA
ERCC6_3	394	.	G	A	.	.	.	GT	0	NA	NA	NA	0	NA	NA	NA	NA	NA	1	NA	NA	NA	NA	NA	NA	NA	NA	NA	NA
ERCC6_3	395	.	C	T	.	.	.	GT	0	NA	NA	NA	0	NA	NA	NA	NA	NA	1	NA	NA	NA	NA	NA	NA	NA	NA	NA	NA
ERCC6_3	398	.	C	G	.	.	.	GT	0	NA	NA	NA	0	NA	NA	NA	NA	NA	1	NA	NA	NA	NA	NA	NA	NA	NA	NA	NA
ERCC6_3	399	.	G	C	.	.	.	GT	0	NA	NA	NA	0	NA	NA	NA	NA	NA	1	NA	NA	NA	NA	NA	NA	NA	NA	NA	NA
ERCC6_3	400	.	C	G	.	.	.	GT	0	NA	NA	NA	0	NA	NA	NA	NA	NA	1	NA	NA	NA	NA	NA	NA	NA	NA	NA	NA
ERCC6_3	401	.	T	A	.	.	.	GT	0	NA	NA	NA	0	NA	NA	NA	NA	NA	1	NA	NA	NA	NA	NA	NA	NA	NA	NA	NA
ERCC6_3	403	.	C	A	.	.	.	GT	0	NA	NA	NA	0	NA	NA	NA	NA	NA	1	NA	NA	NA	NA	NA	NA	NA	NA	NA	NA
[truncated: 334 more rows]

## Sheet: Table S6
Table S6. Variant calling of Snf2 gene-associated SNPs across barley accessions.
[truncated: 884 more rows]

[truncated: 3 more sheets: Table S7, Table S8, Table S9]
